# Supplementary material for: MicroRNA 3′-compensatory pairing occurs through two binding modes, with affinity shaped by nucleotide identity and position
Source: eLife. 2022 Feb 22;11:e69803. doi: 10.7554/eLife.69803 (PMC8940178; doi:10.7554/eLife.69803)
Supplement: Supplementary file 1. [file elife-69803-supp1.xlsx]

## Sheet: oligo_df_210726_library0
Library of DNA sequences used for let-7a massively parallel reporter assay
Seed	ThreePrime	Bulge	Location	Context	Sequence
lin-41	9mer-m11.19	T	dual	lin-41_context	TCTACAGTCCGACGATCACCTCTTTTCCTCAAATTGCACCAACTCAAGTATACCTTTTATACAACCGTTCTACACTCAACGCGATGTAAATATCGCAATCCCTTTTTATACAACCATTCTGCCTCTGAACCATTGAAACCTTCTCCCGTACTCCCACCAATAGATTTACCAATGCCCTGGCTCTGCCC
8mer			left	lin-41_context	TCTACAGTCCGACGATCACCTCTTTTCCTCAAATTGCACCAACTCAAGTATACCTTTTGCGCTTTAGTCTACCTCAACGCGATGTAAATATCGCAATCCCTTTTTAAATCTTTATTGATGTGTGAACCATTGAAACCTTCTCCCGTACTCCCACCAATAGATTTACCAATGCCCTGGCTCTGCCCTGG
8mer			right	lin-41_context	TCTACAGTCCGACGATCACCTCTTTTCCTCAAATTGCACCAACTCAAGTATACCTTTTGCGCTTTAGTTTTAAGACACGCGATGTAAATATCGCAATCCCTTTTTAAATCTTTATCTACCTCAGAACCATTGAAACCTTCTCCCGTACTCCCACCAATAGATTTACCAATGCCCTGGCTCTGCCCTGG
8mer			dual	lin-41_context	TCTACAGTCCGACGATCACCTCTTTTCCTCAAATTGCACCAACTCAAGTATACCTTTTGCGCTTTAGTCTACCTCAACGCGATGTAAATATCGCAATCCCTTTTTAAATCTTTATCTACCTCAGAACCATTGAAACCTTCTCCCGTACTCCCACCAATAGATTTACCAATGCCCTGGCTCTGCCCTGG
7mer-m8			left	lin-41_context	TCTACAGTCCGACGATCACCTCTTTTCCTCAAATTGCACCAACTCAAGTATACCTTTTGCGCTTTAGTCTACCTCCACGCGATGTAAATATCGCAATCCCTTTTTAAATCTTTATTGATGTGTGAACCATTGAAACCTTCTCCCGTACTCCCACCAATAGATTTACCAATGCCCTGGCTCTGCCCTGG
7mer-m8			right	lin-41_context	TCTACAGTCCGACGATCACCTCTTTTCCTCAAATTGCACCAACTCAAGTATACCTTTTGCGCTTTAGTTTTAAGACACGCGATGTAAATATCGCAATCCCTTTTTAAATCTTTATCTACCTCTGAACCATTGAAACCTTCTCCCGTACTCCCACCAATAGATTTACCAATGCCCTGGCTCTGCCCTGG
7mer-m8			dual	lin-41_context	TCTACAGTCCGACGATCACCTCTTTTCCTCAAATTGCACCAACTCAAGTATACCTTTTGCGCTTTAGTCTACCTCCACGCGATGTAAATATCGCAATCCCTTTTTAAATCTTTATCTACCTCTGAACCATTGAAACCTTCTCCCGTACTCCCACCAATAGATTTACCAATGCCCTGGCTCTGCCCTGG
7mer-A1			left	lin-41_context	TCTACAGTCCGACGATCACCTCTTTTCCTCAAATTGCACCAACTCAAGTATACCTTTTGCGCTTTAGTTTACCTCAACGCGATGTAAATATCGCAATCCCTTTTTAAATCTTTATTGATGTGTGAACCATTGAAACCTTCTCCCGTACTCCCACCAATAGATTTACCAATGCCCTGGCTCTGCCCTGG
7mer-A1			right	lin-41_context	TCTACAGTCCGACGATCACCTCTTTTCCTCAAATTGCACCAACTCAAGTATACCTTTTGCGCTTTAGTTTTAAGACACGCGATGTAAATATCGCAATCCCTTTTTAAATCTTTATTTACCTCAGAACCATTGAAACCTTCTCCCGTACTCCCACCAATAGATTTACCAATGCCCTGGCTCTGCCCTGG
7mer-A1			dual	lin-41_context	TCTACAGTCCGACGATCACCTCTTTTCCTCAAATTGCACCAACTCAAGTATACCTTTTGCGCTTTAGTTTACCTCAACGCGATGTAAATATCGCAATCCCTTTTTAAATCTTTATTTACCTCAGAACCATTGAAACCTTCTCCCGTACTCCCACCAATAGATTTACCAATGCCCTGGCTCTGCCCTGG
6mer			left	lin-41_context	TCTACAGTCCGACGATCACCTCTTTTCCTCAAATTGCACCAACTCAAGTATACCTTTTGCGCTTTAGTTTACCTCCACGCGATGTAAATATCGCAATCCCTTTTTAAATCTTTATTGATGTGTGAACCATTGAAACCTTCTCCCGTACTCCCACCAATAGATTTACCAATGCCCTGGCTCTGCCCTGG
6mer			right	lin-41_context	TCTACAGTCCGACGATCACCTCTTTTCCTCAAATTGCACCAACTCAAGTATACCTTTTGCGCTTTAGTTTTAAGACACGCGATGTAAATATCGCAATCCCTTTTTAAATCTTTATTTACCTCTGAACCATTGAAACCTTCTCCCGTACTCCCACCAATAGATTTACCAATGCCCTGGCTCTGCCCTGG
6mer			dual	lin-41_context	TCTACAGTCCGACGATCACCTCTTTTCCTCAAATTGCACCAACTCAAGTATACCTTTTGCGCTTTAGTTTACCTCCACGCGATGTAAATATCGCAATCCCTTTTTAAATCTTTATTTACCTCTGAACCATTGAAACCTTCTCCCGTACTCCCACCAATAGATTTACCAATGCCCTGGCTCTGCCCTGG
8mer-w6			left	lin-41_context	TCTACAGTCCGACGATCACCTCTTTTCCTCAAATTGCACCAACTCAAGTATACCTTTTGCGCTTTAGTCTGCCTCAACGCGATGTAAATATCGCAATCCCTTTTTAAATCTTTATTGATGTGTGAACCATTGAAACCTTCTCCCGTACTCCCACCAATAGATTTACCAATGCCCTGGCTCTGCCCTGG
8mer-w6			right	lin-41_context	TCTACAGTCCGACGATCACCTCTTTTCCTCAAATTGCACCAACTCAAGTATACCTTTTGCGCTTTAGTTTTAAGACACGCGATGTAAATATCGCAATCCCTTTTTAAATCTTTATCTGCCTCAGAACCATTGAAACCTTCTCCCGTACTCCCACCAATAGATTTACCAATGCCCTGGCTCTGCCCTGG
8mer-w6			dual	lin-41_context	TCTACAGTCCGACGATCACCTCTTTTCCTCAAATTGCACCAACTCAAGTATACCTTTTGCGCTTTAGTCTGCCTCAACGCGATGTAAATATCGCAATCCCTTTTTAAATCTTTATCTGCCTCAGAACCATTGAAACCTTCTCCCGTACTCCCACCAATAGATTTACCAATGCCCTGGCTCTGCCCTGG
8mer-w6	4mer-m13.16		left	lin-41_context	TCTACAGTCCGACGATCACCTCTTTTCCTCAAATTGCACCAACTCAAGTATACCTTTTGCACAATAGTCTGCCTCAACGCGATGTAAATATCGCAATCCCTTTTTAAATCTTTATTGATGTGTGAACCATTGAAACCTTCTCCCGTACTCCCACCAATAGATTTACCAATGCCCTGGCTCTGCCCTGG
8mer-w6	4mer-m13.16		right	lin-41_context	TCTACAGTCCGACGATCACCTCTTTTCCTCAAATTGCACCAACTCAAGTATACCTTTTGCGCTTTAGTTTTAAGACACGCGATGTAAATATCGCAATCCCTTTTTAAACAATTATCTGCCTCAGAACCATTGAAACCTTCTCCCGTACTCCCACCAATAGATTTACCAATGCCCTGGCTCTGCCCTGG
8mer-w6	4mer-m13.16		dual	lin-41_context	TCTACAGTCCGACGATCACCTCTTTTCCTCAAATTGCACCAACTCAAGTATACCTTTTGCACAATAGTCTGCCTCAACGCGATGTAAATATCGCAATCCCTTTTTAAACAATTATCTGCCTCAGAACCATTGAAACCTTCTCCCGTACTCCCACCAATAGATTTACCAATGCCCTGGCTCTGCCCTGG
8mer-w6	4mer-m13.16	A	left	lin-41_context	TCTACAGTCCGACGATCACCTCTTTTCCTCAAATTGCACCAACTCAAGTATACCTTTTGCACAATAGATCTGCCTCAACGCGATGTAAATATCGCAATCCCTTTTTAAATCTTTATTGATGTGTGAACCATTGAAACCTTCTCCCGTACTCCCACCAATAGATTTACCAATGCCCTGGCTCTGCCCTG
8mer-w6	4mer-m13.16	A	right	lin-41_context	TCTACAGTCCGACGATCACCTCTTTTCCTCAAATTGCACCAACTCAAGTATACCTTTTGCGCTTTAGTTTTAAGACACGCGATGTAAATATCGCAATCCCTTTTTAAACAATTAATCTGCCTCAGAACCATTGAAACCTTCTCCCGTACTCCCACCAATAGATTTACCAATGCCCTGGCTCTGCCCTG
8mer-w6	4mer-m13.16	A	dual	lin-41_context	TCTACAGTCCGACGATCACCTCTTTTCCTCAAATTGCACCAACTCAAGTATACCTTTTGCACAATAGATCTGCCTCAACGCGATGTAAATATCGCAATCCCTTTTTAAACAATTAATCTGCCTCAGAACCATTGAAACCTTCTCCCGTACTCCCACCAATAGATTTACCAATGCCCTGGCTCTGCCCT
8mer-w6	4mer-m13.16	AAAA	left	lin-41_context	TCTACAGTCCGACGATCACCTCTTTTCCTCAAATTGCACCAACTCAAGTATACCTTTTGCACAATAGAAAATCTGCCTCAACGCGATGTAAATATCGCAATCCCTTTTTAAATCTTTATTGATGTGTGAACCATTGAAACCTTCTCCCGTACTCCCACCAATAGATTTACCAATGCCCTGGCTCTGCC
8mer-w6	4mer-m13.16	AAAA	right	lin-41_context	TCTACAGTCCGACGATCACCTCTTTTCCTCAAATTGCACCAACTCAAGTATACCTTTTGCGCTTTAGTTTTAAGACACGCGATGTAAATATCGCAATCCCTTTTTAAACAATTAAAAATCTGCCTCAGAACCATTGAAACCTTCTCCCGTACTCCCACCAATAGATTTACCAATGCCCTGGCTCTGCC
8mer-w6	4mer-m13.16	AAAA	dual	lin-41_context	TCTACAGTCCGACGATCACCTCTTTTCCTCAAATTGCACCAACTCAAGTATACCTTTTGCACAATAGAAAATCTGCCTCAACGCGATGTAAATATCGCAATCCCTTTTTAAACAATTAAAAATCTGCCTCAGAACCATTGAAACCTTCTCCCGTACTCCCACCAATAGATTTACCAATGCCCTGGCTC
8mer-w6	4mer-m13.16	T	left	lin-41_context	TCTACAGTCCGACGATCACCTCTTTTCCTCAAATTGCACCAACTCAAGTATACCTTTTGCACAATAGTTCTGCCTCAACGCGATGTAAATATCGCAATCCCTTTTTAAATCTTTATTGATGTGTGAACCATTGAAACCTTCTCCCGTACTCCCACCAATAGATTTACCAATGCCCTGGCTCTGCCCTG
8mer-w6	4mer-m13.16	T	right	lin-41_context	TCTACAGTCCGACGATCACCTCTTTTCCTCAAATTGCACCAACTCAAGTATACCTTTTGCGCTTTAGTTTTAAGACACGCGATGTAAATATCGCAATCCCTTTTTAAACAATTATTCTGCCTCAGAACCATTGAAACCTTCTCCCGTACTCCCACCAATAGATTTACCAATGCCCTGGCTCTGCCCTG
8mer-w6	4mer-m13.16	T	dual	lin-41_context	TCTACAGTCCGACGATCACCTCTTTTCCTCAAATTGCACCAACTCAAGTATACCTTTTGCACAATAGTTCTGCCTCAACGCGATGTAAATATCGCAATCCCTTTTTAAACAATTATTCTGCCTCAGAACCATTGAAACCTTCTCCCGTACTCCCACCAATAGATTTACCAATGCCCTGGCTCTGCCCT
8mer-w6	4mer-m13.16	TTTT	left	lin-41_context	TCTACAGTCCGACGATCACCTCTTTTCCTCAAATTGCACCAACTCAAGTATACCTTTTGCACAATAGTTTTTCTGCCTCAACGCGATGTAAATATCGCAATCCCTTTTTAAATCTTTATTGATGTGTGAACCATTGAAACCTTCTCCCGTACTCCCACCAATAGATTTACCAATGCCCTGGCTCTGCC
8mer-w6	4mer-m13.16	TTTT	right	lin-41_context	TCTACAGTCCGACGATCACCTCTTTTCCTCAAATTGCACCAACTCAAGTATACCTTTTGCGCTTTAGTTTTAAGACACGCGATGTAAATATCGCAATCCCTTTTTAAACAATTATTTTTCTGCCTCAGAACCATTGAAACCTTCTCCCGTACTCCCACCAATAGATTTACCAATGCCCTGGCTCTGCC
8mer-w6	4mer-m13.16	TTTT	dual	lin-41_context	TCTACAGTCCGACGATCACCTCTTTTCCTCAAATTGCACCAACTCAAGTATACCTTTTGCACAATAGTTTTTCTGCCTCAACGCGATGTAAATATCGCAATCCCTTTTTAAACAATTATTTTTCTGCCTCAGAACCATTGAAACCTTCTCCCGTACTCCCACCAATAGATTTACCAATGCCCTGGCTC
8mer-w6	9mer-m11.19		left	lin-41_context	TCTACAGTCCGACGATCACCTCTTTTCCTCAAATTGCACCAACTCAAGTATACCTTTTATACAACCGTCTGCCTCAACGCGATGTAAATATCGCAATCCCTTTTTAAATCTTTATTGATGTGTGAACCATTGAAACCTTCTCCCGTACTCCCACCAATAGATTTACCAATGCCCTGGCTCTGCCCTGG
8mer-w6	9mer-m11.19		right	lin-41_context	TCTACAGTCCGACGATCACCTCTTTTCCTCAAATTGCACCAACTCAAGTATACCTTTTGCGCTTTAGTTTTAAGACACGCGATGTAAATATCGCAATCCCTTTTTATACAACCATCTGCCTCAGAACCATTGAAACCTTCTCCCGTACTCCCACCAATAGATTTACCAATGCCCTGGCTCTGCCCTGG
8mer-w6	9mer-m11.19		dual	lin-41_context	TCTACAGTCCGACGATCACCTCTTTTCCTCAAATTGCACCAACTCAAGTATACCTTTTATACAACCGTCTGCCTCAACGCGATGTAAATATCGCAATCCCTTTTTATACAACCATCTGCCTCAGAACCATTGAAACCTTCTCCCGTACTCCCACCAATAGATTTACCAATGCCCTGGCTCTGCCCTGG
8mer-w6	9mer-m11.19	A	left	lin-41_context	TCTACAGTCCGACGATCACCTCTTTTCCTCAAATTGCACCAACTCAAGTATACCTTTTATACAACCGATCTGCCTCAACGCGATGTAAATATCGCAATCCCTTTTTAAATCTTTATTGATGTGTGAACCATTGAAACCTTCTCCCGTACTCCCACCAATAGATTTACCAATGCCCTGGCTCTGCCCTG
8mer-w6	9mer-m11.19	A	right	lin-41_context	TCTACAGTCCGACGATCACCTCTTTTCCTCAAATTGCACCAACTCAAGTATACCTTTTGCGCTTTAGTTTTAAGACACGCGATGTAAATATCGCAATCCCTTTTTATACAACCAATCTGCCTCAGAACCATTGAAACCTTCTCCCGTACTCCCACCAATAGATTTACCAATGCCCTGGCTCTGCCCTG
8mer-w6	9mer-m11.19	A	dual	lin-41_context	TCTACAGTCCGACGATCACCTCTTTTCCTCAAATTGCACCAACTCAAGTATACCTTTTATACAACCGATCTGCCTCAACGCGATGTAAATATCGCAATCCCTTTTTATACAACCAATCTGCCTCAGAACCATTGAAACCTTCTCCCGTACTCCCACCAATAGATTTACCAATGCCCTGGCTCTGCCCT
8mer-w6	9mer-m11.19	AAAA	left	lin-41_context	TCTACAGTCCGACGATCACCTCTTTTCCTCAAATTGCACCAACTCAAGTATACCTTTTATACAACCGAAAATCTGCCTCAACGCGATGTAAATATCGCAATCCCTTTTTAAATCTTTATTGATGTGTGAACCATTGAAACCTTCTCCCGTACTCCCACCAATAGATTTACCAATGCCCTGGCTCTGCC
8mer-w6	9mer-m11.19	AAAA	right	lin-41_context	TCTACAGTCCGACGATCACCTCTTTTCCTCAAATTGCACCAACTCAAGTATACCTTTTGCGCTTTAGTTTTAAGACACGCGATGTAAATATCGCAATCCCTTTTTATACAACCAAAAATCTGCCTCAGAACCATTGAAACCTTCTCCCGTACTCCCACCAATAGATTTACCAATGCCCTGGCTCTGCC
8mer-w6	9mer-m11.19	AAAA	dual	lin-41_context	TCTACAGTCCGACGATCACCTCTTTTCCTCAAATTGCACCAACTCAAGTATACCTTTTATACAACCGAAAATCTGCCTCAACGCGATGTAAATATCGCAATCCCTTTTTATACAACCAAAAATCTGCCTCAGAACCATTGAAACCTTCTCCCGTACTCCCACCAATAGATTTACCAATGCCCTGGCTC
8mer-w6	9mer-m11.19	T	left	lin-41_context	TCTACAGTCCGACGATCACCTCTTTTCCTCAAATTGCACCAACTCAAGTATACCTTTTATACAACCGTTCTGCCTCAACGCGATGTAAATATCGCAATCCCTTTTTAAATCTTTATTGATGTGTGAACCATTGAAACCTTCTCCCGTACTCCCACCAATAGATTTACCAATGCCCTGGCTCTGCCCTG
8mer-w6	9mer-m11.19	T	right	lin-41_context	TCTACAGTCCGACGATCACCTCTTTTCCTCAAATTGCACCAACTCAAGTATACCTTTTGCGCTTTAGTTTTAAGACACGCGATGTAAATATCGCAATCCCTTTTTATACAACCATTCTGCCTCAGAACCATTGAAACCTTCTCCCGTACTCCCACCAATAGATTTACCAATGCCCTGGCTCTGCCCTG
8mer-w6	9mer-m11.19	T	dual	lin-41_context	TCTACAGTCCGACGATCACCTCTTTTCCTCAAATTGCACCAACTCAAGTATACCTTTTATACAACCGTTCTGCCTCAACGCGATGTAAATATCGCAATCCCTTTTTATACAACCATTCTGCCTCAGAACCATTGAAACCTTCTCCCGTACTCCCACCAATAGATTTACCAATGCCCTGGCTCTGCCCT
8mer-w6	9mer-m11.19	TTTT	left	lin-41_context	TCTACAGTCCGACGATCACCTCTTTTCCTCAAATTGCACCAACTCAAGTATACCTTTTATACAACCGTTTTTCTGCCTCAACGCGATGTAAATATCGCAATCCCTTTTTAAATCTTTATTGATGTGTGAACCATTGAAACCTTCTCCCGTACTCCCACCAATAGATTTACCAATGCCCTGGCTCTGCC
8mer-w6	9mer-m11.19	TTTT	right	lin-41_context	TCTACAGTCCGACGATCACCTCTTTTCCTCAAATTGCACCAACTCAAGTATACCTTTTGCGCTTTAGTTTTAAGACACGCGATGTAAATATCGCAATCCCTTTTTATACAACCATTTTTCTGCCTCAGAACCATTGAAACCTTCTCCCGTACTCCCACCAATAGATTTACCAATGCCCTGGCTCTGCC
8mer-w6	9mer-m11.19	TTTT	dual	lin-41_context	TCTACAGTCCGACGATCACCTCTTTTCCTCAAATTGCACCAACTCAAGTATACCTTTTATACAACCGTTTTTCTGCCTCAACGCGATGTAAATATCGCAATCCCTTTTTATACAACCATTTTTCTGCCTCAGAACCATTGAAACCTTCTCCCGTACTCCCACCAATAGATTTACCAATGCCCTGGCTC
8mer-w6	9mer-m13.21		left	lin-41_context	TCTACAGTCCGACGATCACCTCTTTTCCTCAAATTGCACCAACTCAAGTATACCTACTATACAATAGTCTGCCTCAACGCGATGTAAATATCGCAATCCCTTTTTAAATCTTTATTGATGTGTGAACCATTGAAACCTTCTCCCGTACTCCCACCAATAGATTTACCAATGCCCTGGCTCTGCCCTGG
8mer-w6	9mer-m13.21		right	lin-41_context	TCTACAGTCCGACGATCACCTCTTTTCCTCAAATTGCACCAACTCAAGTATACCTTTTGCGCTTTAGTTTTAAGACACGCGATGTAAATATCGCAATCCCTTACTATACAATTATCTGCCTCAGAACCATTGAAACCTTCTCCCGTACTCCCACCAATAGATTTACCAATGCCCTGGCTCTGCCCTGG
8mer-w6	9mer-m13.21		dual	lin-41_context	TCTACAGTCCGACGATCACCTCTTTTCCTCAAATTGCACCAACTCAAGTATACCTACTATACAATAGTCTGCCTCAACGCGATGTAAATATCGCAATCCCTTACTATACAATTATCTGCCTCAGAACCATTGAAACCTTCTCCCGTACTCCCACCAATAGATTTACCAATGCCCTGGCTCTGCCCTGG
8mer-w6	9mer-m13.21	A	left	lin-41_context	TCTACAGTCCGACGATCACCTCTTTTCCTCAAATTGCACCAACTCAAGTATACCTACTATACAATAGATCTGCCTCAACGCGATGTAAATATCGCAATCCCTTTTTAAATCTTTATTGATGTGTGAACCATTGAAACCTTCTCCCGTACTCCCACCAATAGATTTACCAATGCCCTGGCTCTGCCCTG
8mer-w6	9mer-m13.21	A	right	lin-41_context	TCTACAGTCCGACGATCACCTCTTTTCCTCAAATTGCACCAACTCAAGTATACCTTTTGCGCTTTAGTTTTAAGACACGCGATGTAAATATCGCAATCCCTTACTATACAATTAATCTGCCTCAGAACCATTGAAACCTTCTCCCGTACTCCCACCAATAGATTTACCAATGCCCTGGCTCTGCCCTG
8mer-w6	9mer-m13.21	A	dual	lin-41_context	TCTACAGTCCGACGATCACCTCTTTTCCTCAAATTGCACCAACTCAAGTATACCTACTATACAATAGATCTGCCTCAACGCGATGTAAATATCGCAATCCCTTACTATACAATTAATCTGCCTCAGAACCATTGAAACCTTCTCCCGTACTCCCACCAATAGATTTACCAATGCCCTGGCTCTGCCCT
8mer-w6	9mer-m13.21	AAAA	left	lin-41_context	TCTACAGTCCGACGATCACCTCTTTTCCTCAAATTGCACCAACTCAAGTATACCTACTATACAATAGAAAATCTGCCTCAACGCGATGTAAATATCGCAATCCCTTTTTAAATCTTTATTGATGTGTGAACCATTGAAACCTTCTCCCGTACTCCCACCAATAGATTTACCAATGCCCTGGCTCTGCC
8mer-w6	9mer-m13.21	AAAA	right	lin-41_context	TCTACAGTCCGACGATCACCTCTTTTCCTCAAATTGCACCAACTCAAGTATACCTTTTGCGCTTTAGTTTTAAGACACGCGATGTAAATATCGCAATCCCTTACTATACAATTAAAAATCTGCCTCAGAACCATTGAAACCTTCTCCCGTACTCCCACCAATAGATTTACCAATGCCCTGGCTCTGCC
8mer-w6	9mer-m13.21	AAAA	dual	lin-41_context	TCTACAGTCCGACGATCACCTCTTTTCCTCAAATTGCACCAACTCAAGTATACCTACTATACAATAGAAAATCTGCCTCAACGCGATGTAAATATCGCAATCCCTTACTATACAATTAAAAATCTGCCTCAGAACCATTGAAACCTTCTCCCGTACTCCCACCAATAGATTTACCAATGCCCTGGCTC
8mer-w6	9mer-m13.21	T	left	lin-41_context	TCTACAGTCCGACGATCACCTCTTTTCCTCAAATTGCACCAACTCAAGTATACCTACTATACAATAGTTCTGCCTCAACGCGATGTAAATATCGCAATCCCTTTTTAAATCTTTATTGATGTGTGAACCATTGAAACCTTCTCCCGTACTCCCACCAATAGATTTACCAATGCCCTGGCTCTGCCCTG
8mer-w6	9mer-m13.21	T	right	lin-41_context	TCTACAGTCCGACGATCACCTCTTTTCCTCAAATTGCACCAACTCAAGTATACCTTTTGCGCTTTAGTTTTAAGACACGCGATGTAAATATCGCAATCCCTTACTATACAATTATTCTGCCTCAGAACCATTGAAACCTTCTCCCGTACTCCCACCAATAGATTTACCAATGCCCTGGCTCTGCCCTG
8mer-w6	9mer-m13.21	T	dual	lin-41_context	TCTACAGTCCGACGATCACCTCTTTTCCTCAAATTGCACCAACTCAAGTATACCTACTATACAATAGTTCTGCCTCAACGCGATGTAAATATCGCAATCCCTTACTATACAATTATTCTGCCTCAGAACCATTGAAACCTTCTCCCGTACTCCCACCAATAGATTTACCAATGCCCTGGCTCTGCCCT
8mer-w6	9mer-m13.21	TTTT	left	lin-41_context	TCTACAGTCCGACGATCACCTCTTTTCCTCAAATTGCACCAACTCAAGTATACCTACTATACAATAGTTTTTCTGCCTCAACGCGATGTAAATATCGCAATCCCTTTTTAAATCTTTATTGATGTGTGAACCATTGAAACCTTCTCCCGTACTCCCACCAATAGATTTACCAATGCCCTGGCTCTGCC
8mer-w6	9mer-m13.21	TTTT	right	lin-41_context	TCTACAGTCCGACGATCACCTCTTTTCCTCAAATTGCACCAACTCAAGTATACCTTTTGCGCTTTAGTTTTAAGACACGCGATGTAAATATCGCAATCCCTTACTATACAATTATTTTTCTGCCTCAGAACCATTGAAACCTTCTCCCGTACTCCCACCAATAGATTTACCAATGCCCTGGCTCTGCC
8mer-w6	9mer-m13.21	TTTT	dual	lin-41_context	TCTACAGTCCGACGATCACCTCTTTTCCTCAAATTGCACCAACTCAAGTATACCTACTATACAATAGTTTTTCTGCCTCAACGCGATGTAAATATCGCAATCCCTTACTATACAATTATTTTTCTGCCTCAGAACCATTGAAACCTTCTCCCGTACTCCCACCAATAGATTTACCAATGCCCTGGCTC
No_site_0				lin-41_context	TCTACAGTCCGACGATCACCTCTTTTCCTCAAATTGCACCAACTCAAGTATACCTTTTGCGCTTTAGTTTTAAGACACGCGATGTAAATATCGCAATCCCTTTTTAAATCTTTATTGATGTGTGAACCATTGAAACCTTCTCCCGTACTCCCACCAATAGATTTACCAATGCCCTGGCTCTGCCCTGG
No_site_1				lin-41_context	TCTACAGTCCGACGATCACCTCTTTTCCTCAAATTGCACCAACTCAAGTATACCTTGGAGGAGGATTTCAATGCAAACGCGATGTAAATATCGCAATCCCTTTATTTTGTCGAAACTGACTGTGAACCATTGAAACCTTCTCCCGTACTCCCACCAATAGATTTACCAATGCCCTGGCTCTGCCCTGG
No_site_2				lin-41_context	TCTACAGTCCGACGATCACCTCTTTTCCTCAAATTGCACCAACTCAAGTATACCTTTAGCTAATATTTGAAAGCTGACGCGATGTAAATATCGCAATCCCTTTCAACTAAGATCAATTCAAGCGAACCATTGAAACCTTCTCCCGTACTCCCACCAATAGATTTACCAATGCCCTGGCTCTGCCCTGG
No_site_3				lin-41_context	TCTACAGTCCGACGATCACCTCTTTTCCTCAAATTGCACCAACTCAAGTATACCTTGACCAAAATTATAAGTCCGCACGCGATGTAAATATCGCAATCCCTTTTGTTACCATGCATGGACAAAGAACCATTGAAACCTTCTCCCGTACTCCCACCAATAGATTTACCAATGCCCTGGCTCTGCCCTGG
No_site_4				lin-41_context	TCTACAGTCCGACGATCACCTCTTTTCCTCAAATTGCACCAACTCAAGTATACCTTGATGTCTAAAAAATTTTACGACGCGATGTAAATATCGCAATCCCTTTCAAGCCTCAAGCCGGAGTTAGAACCATTGAAACCTTCTCCCGTACTCCCACCAATAGATTTACCAATGCCCTGGCTCTGCCCTGG
No_site_5				lin-41_context	TCTACAGTCCGACGATCACCTCTTTTCCTCAAATTGCACCAACTCAAGTATACCTTTATCCGGATTTTGTTTTTTGACGCGATGTAAATATCGCAATCCCTTTTGCTGGAGCTGCATCCTGGAGAACCATTGAAACCTTCTCCCGTACTCCCACCAATAGATTTACCAATGCCCTGGCTCTGCCCTGG
No_site_6				lin-41_context	TCTACAGTCCGACGATCACCTCTTTTCCTCAAATTGCACCAACTCAAGTATACCTTGTCCCTATTATACGGGCCCCACGCGATGTAAATATCGCAATCCCTTTGAACTTGATTGTTGCCTGGCGAACCATTGAAACCTTCTCCCGTACTCCCACCAATAGATTTACCAATGCCCTGGCTCTGCCCTGG
lin-41	9mer-m11.19	T	dual	Context_1	TCTACAGTCCGACGATCATTGCTGCGCTGACGAGTCGAACCCTATTTGGCGGTGTTGTATACAACCATTCTACACTCATAGGAGGTTCTAAAGGCTTGAACTACAGTATACAACCATTCTGCCTCTTTGACCAGGTGAAAGGGTTGACTCATCATAATATGGAGGATACCAATGCCCTGGCTCTGCCC
8mer			left	Context_1	TCTACAGTCCGACGATCATTGCTGCGCTGACGAGTCGAACCCTATTTGGCGGTGTTGATATCCAGTATCTACCTCATAGGAGGTTCTAAAGGCTTGAACTACAGTCGGACATTATTGCCCAGTTTGACCAGGTGAAAGGGTTGACTCATCATAATATGGAGGATACCAATGCCCTGGCTCTGCCCTGG
8mer			right	Context_1	TCTACAGTCCGACGATCATTGCTGCGCTGACGAGTCGAACCCTATTTGGCGGTGTTGATATCCAGTATTTCTTACCTAGGAGGTTCTAAAGGCTTGAACTACAGTCGGACATTATCTACCTCATTGACCAGGTGAAAGGGTTGACTCATCATAATATGGAGGATACCAATGCCCTGGCTCTGCCCTGG
8mer			dual	Context_1	TCTACAGTCCGACGATCATTGCTGCGCTGACGAGTCGAACCCTATTTGGCGGTGTTGATATCCAGTATCTACCTCATAGGAGGTTCTAAAGGCTTGAACTACAGTCGGACATTATCTACCTCATTGACCAGGTGAAAGGGTTGACTCATCATAATATGGAGGATACCAATGCCCTGGCTCTGCCCTGG
7mer-m8			left	Context_1	TCTACAGTCCGACGATCATTGCTGCGCTGACGAGTCGAACCCTATTTGGCGGTGTTGATATCCAGTATCTACCTCCTAGGAGGTTCTAAAGGCTTGAACTACAGTCGGACATTATTGCCCAGTTTGACCAGGTGAAAGGGTTGACTCATCATAATATGGAGGATACCAATGCCCTGGCTCTGCCCTGG
7mer-m8			right	Context_1	TCTACAGTCCGACGATCATTGCTGCGCTGACGAGTCGAACCCTATTTGGCGGTGTTGATATCCAGTATTTCTTACCTAGGAGGTTCTAAAGGCTTGAACTACAGTCGGACATTATCTACCTCTTTGACCAGGTGAAAGGGTTGACTCATCATAATATGGAGGATACCAATGCCCTGGCTCTGCCCTGG
7mer-m8			dual	Context_1	TCTACAGTCCGACGATCATTGCTGCGCTGACGAGTCGAACCCTATTTGGCGGTGTTGATATCCAGTATCTACCTCCTAGGAGGTTCTAAAGGCTTGAACTACAGTCGGACATTATCTACCTCTTTGACCAGGTGAAAGGGTTGACTCATCATAATATGGAGGATACCAATGCCCTGGCTCTGCCCTGG
7mer-A1			left	Context_1	TCTACAGTCCGACGATCATTGCTGCGCTGACGAGTCGAACCCTATTTGGCGGTGTTGATATCCAGTATTTACCTCATAGGAGGTTCTAAAGGCTTGAACTACAGTCGGACATTATTGCCCAGTTTGACCAGGTGAAAGGGTTGACTCATCATAATATGGAGGATACCAATGCCCTGGCTCTGCCCTGG
7mer-A1			right	Context_1	TCTACAGTCCGACGATCATTGCTGCGCTGACGAGTCGAACCCTATTTGGCGGTGTTGATATCCAGTATTTCTTACCTAGGAGGTTCTAAAGGCTTGAACTACAGTCGGACATTATTTACCTCATTGACCAGGTGAAAGGGTTGACTCATCATAATATGGAGGATACCAATGCCCTGGCTCTGCCCTGG
7mer-A1			dual	Context_1	TCTACAGTCCGACGATCATTGCTGCGCTGACGAGTCGAACCCTATTTGGCGGTGTTGATATCCAGTATTTACCTCATAGGAGGTTCTAAAGGCTTGAACTACAGTCGGACATTATTTACCTCATTGACCAGGTGAAAGGGTTGACTCATCATAATATGGAGGATACCAATGCCCTGGCTCTGCCCTGG
6mer			left	Context_1	TCTACAGTCCGACGATCATTGCTGCGCTGACGAGTCGAACCCTATTTGGCGGTGTTGATATCCAGTATTTACCTCCTAGGAGGTTCTAAAGGCTTGAACTACAGTCGGACATTATTGCCCAGTTTGACCAGGTGAAAGGGTTGACTCATCATAATATGGAGGATACCAATGCCCTGGCTCTGCCCTGG
6mer			right	Context_1	TCTACAGTCCGACGATCATTGCTGCGCTGACGAGTCGAACCCTATTTGGCGGTGTTGATATCCAGTATTTCTTACCTAGGAGGTTCTAAAGGCTTGAACTACAGTCGGACATTATTTACCTCTTTGACCAGGTGAAAGGGTTGACTCATCATAATATGGAGGATACCAATGCCCTGGCTCTGCCCTGG
6mer			dual	Context_1	TCTACAGTCCGACGATCATTGCTGCGCTGACGAGTCGAACCCTATTTGGCGGTGTTGATATCCAGTATTTACCTCCTAGGAGGTTCTAAAGGCTTGAACTACAGTCGGACATTATTTACCTCTTTGACCAGGTGAAAGGGTTGACTCATCATAATATGGAGGATACCAATGCCCTGGCTCTGCCCTGG
8mer-w6			left	Context_1	TCTACAGTCCGACGATCATTGCTGCGCTGACGAGTCGAACCCTATTTGGCGGTGTTGATATCCAGTATCTGCCTCATAGGAGGTTCTAAAGGCTTGAACTACAGTCGGACATTATTGCCCAGTTTGACCAGGTGAAAGGGTTGACTCATCATAATATGGAGGATACCAATGCCCTGGCTCTGCCCTGG
8mer-w6			right	Context_1	TCTACAGTCCGACGATCATTGCTGCGCTGACGAGTCGAACCCTATTTGGCGGTGTTGATATCCAGTATTTCTTACCTAGGAGGTTCTAAAGGCTTGAACTACAGTCGGACATTATCTGCCTCATTGACCAGGTGAAAGGGTTGACTCATCATAATATGGAGGATACCAATGCCCTGGCTCTGCCCTGG
8mer-w6			dual	Context_1	TCTACAGTCCGACGATCATTGCTGCGCTGACGAGTCGAACCCTATTTGGCGGTGTTGATATCCAGTATCTGCCTCATAGGAGGTTCTAAAGGCTTGAACTACAGTCGGACATTATCTGCCTCATTGACCAGGTGAAAGGGTTGACTCATCATAATATGGAGGATACCAATGCCCTGGCTCTGCCCTGG
8mer-w6	4mer-m13.16		left	Context_1	TCTACAGTCCGACGATCATTGCTGCGCTGACGAGTCGAACCCTATTTGGCGGTGTTGATAACAAGTATCTGCCTCATAGGAGGTTCTAAAGGCTTGAACTACAGTCGGACATTATTGCCCAGTTTGACCAGGTGAAAGGGTTGACTCATCATAATATGGAGGATACCAATGCCCTGGCTCTGCCCTGG
8mer-w6	4mer-m13.16		right	Context_1	TCTACAGTCCGACGATCATTGCTGCGCTGACGAGTCGAACCCTATTTGGCGGTGTTGATATCCAGTATTTCTTACCTAGGAGGTTCTAAAGGCTTGAACTACAGTCGACAATTATCTGCCTCATTGACCAGGTGAAAGGGTTGACTCATCATAATATGGAGGATACCAATGCCCTGGCTCTGCCCTGG
8mer-w6	4mer-m13.16		dual	Context_1	TCTACAGTCCGACGATCATTGCTGCGCTGACGAGTCGAACCCTATTTGGCGGTGTTGATAACAAGTATCTGCCTCATAGGAGGTTCTAAAGGCTTGAACTACAGTCGACAATTATCTGCCTCATTGACCAGGTGAAAGGGTTGACTCATCATAATATGGAGGATACCAATGCCCTGGCTCTGCCCTGG
8mer-w6	4mer-m13.16	A	left	Context_1	TCTACAGTCCGACGATCATTGCTGCGCTGACGAGTCGAACCCTATTTGGCGGTGTTGATAACAAGTAATCTGCCTCATAGGAGGTTCTAAAGGCTTGAACTACAGTCGGACATTATTGCCCAGTTTGACCAGGTGAAAGGGTTGACTCATCATAATATGGAGGATACCAATGCCCTGGCTCTGCCCTG
8mer-w6	4mer-m13.16	A	right	Context_1	TCTACAGTCCGACGATCATTGCTGCGCTGACGAGTCGAACCCTATTTGGCGGTGTTGATATCCAGTATTTCTTACCTAGGAGGTTCTAAAGGCTTGAACTACAGTCGACAATTAATCTGCCTCATTGACCAGGTGAAAGGGTTGACTCATCATAATATGGAGGATACCAATGCCCTGGCTCTGCCCTG
8mer-w6	4mer-m13.16	A	dual	Context_1	TCTACAGTCCGACGATCATTGCTGCGCTGACGAGTCGAACCCTATTTGGCGGTGTTGATAACAAGTAATCTGCCTCATAGGAGGTTCTAAAGGCTTGAACTACAGTCGACAATTAATCTGCCTCATTGACCAGGTGAAAGGGTTGACTCATCATAATATGGAGGATACCAATGCCCTGGCTCTGCCCT
8mer-w6	4mer-m13.16	AAAA	left	Context_1	TCTACAGTCCGACGATCATTGCTGCGCTGACGAGTCGAACCCTATTTGGCGGTGTTGATAACAAGTAAAAATCTGCCTCATAGGAGGTTCTAAAGGCTTGAACTACAGTCGGACATTATTGCCCAGTTTGACCAGGTGAAAGGGTTGACTCATCATAATATGGAGGATACCAATGCCCTGGCTCTGCC
8mer-w6	4mer-m13.16	AAAA	right	Context_1	TCTACAGTCCGACGATCATTGCTGCGCTGACGAGTCGAACCCTATTTGGCGGTGTTGATATCCAGTATTTCTTACCTAGGAGGTTCTAAAGGCTTGAACTACAGTCGACAATTAAAAATCTGCCTCATTGACCAGGTGAAAGGGTTGACTCATCATAATATGGAGGATACCAATGCCCTGGCTCTGCC
8mer-w6	4mer-m13.16	AAAA	dual	Context_1	TCTACAGTCCGACGATCATTGCTGCGCTGACGAGTCGAACCCTATTTGGCGGTGTTGATAACAAGTAAAAATCTGCCTCATAGGAGGTTCTAAAGGCTTGAACTACAGTCGACAATTAAAAATCTGCCTCATTGACCAGGTGAAAGGGTTGACTCATCATAATATGGAGGATACCAATGCCCTGGCTC
8mer-w6	4mer-m13.16	T	left	Context_1	TCTACAGTCCGACGATCATTGCTGCGCTGACGAGTCGAACCCTATTTGGCGGTGTTGATAACAAGTATTCTGCCTCATAGGAGGTTCTAAAGGCTTGAACTACAGTCGGACATTATTGCCCAGTTTGACCAGGTGAAAGGGTTGACTCATCATAATATGGAGGATACCAATGCCCTGGCTCTGCCCTG
8mer-w6	4mer-m13.16	T	right	Context_1	TCTACAGTCCGACGATCATTGCTGCGCTGACGAGTCGAACCCTATTTGGCGGTGTTGATATCCAGTATTTCTTACCTAGGAGGTTCTAAAGGCTTGAACTACAGTCGACAATTATTCTGCCTCATTGACCAGGTGAAAGGGTTGACTCATCATAATATGGAGGATACCAATGCCCTGGCTCTGCCCTG
8mer-w6	4mer-m13.16	T	dual	Context_1	TCTACAGTCCGACGATCATTGCTGCGCTGACGAGTCGAACCCTATTTGGCGGTGTTGATAACAAGTATTCTGCCTCATAGGAGGTTCTAAAGGCTTGAACTACAGTCGACAATTATTCTGCCTCATTGACCAGGTGAAAGGGTTGACTCATCATAATATGGAGGATACCAATGCCCTGGCTCTGCCCT
8mer-w6	4mer-m13.16	TTTT	left	Context_1	TCTACAGTCCGACGATCATTGCTGCGCTGACGAGTCGAACCCTATTTGGCGGTGTTGATAACAAGTATTTTTCTGCCTCATAGGAGGTTCTAAAGGCTTGAACTACAGTCGGACATTATTGCCCAGTTTGACCAGGTGAAAGGGTTGACTCATCATAATATGGAGGATACCAATGCCCTGGCTCTGCC
8mer-w6	4mer-m13.16	TTTT	right	Context_1	TCTACAGTCCGACGATCATTGCTGCGCTGACGAGTCGAACCCTATTTGGCGGTGTTGATATCCAGTATTTCTTACCTAGGAGGTTCTAAAGGCTTGAACTACAGTCGACAATTATTTTTCTGCCTCATTGACCAGGTGAAAGGGTTGACTCATCATAATATGGAGGATACCAATGCCCTGGCTCTGCC
8mer-w6	4mer-m13.16	TTTT	dual	Context_1	TCTACAGTCCGACGATCATTGCTGCGCTGACGAGTCGAACCCTATTTGGCGGTGTTGATAACAAGTATTTTTCTGCCTCATAGGAGGTTCTAAAGGCTTGAACTACAGTCGACAATTATTTTTCTGCCTCATTGACCAGGTGAAAGGGTTGACTCATCATAATATGGAGGATACCAATGCCCTGGCTC
8mer-w6	9mer-m11.19		left	Context_1	TCTACAGTCCGACGATCATTGCTGCGCTGACGAGTCGAACCCTATTTGGCGGTGTTGTATACAACCATCTGCCTCATAGGAGGTTCTAAAGGCTTGAACTACAGTCGGACATTATTGCCCAGTTTGACCAGGTGAAAGGGTTGACTCATCATAATATGGAGGATACCAATGCCCTGGCTCTGCCCTGG
8mer-w6	9mer-m11.19		right	Context_1	TCTACAGTCCGACGATCATTGCTGCGCTGACGAGTCGAACCCTATTTGGCGGTGTTGATATCCAGTATTTCTTACCTAGGAGGTTCTAAAGGCTTGAACTACAGTATACAACCATCTGCCTCATTGACCAGGTGAAAGGGTTGACTCATCATAATATGGAGGATACCAATGCCCTGGCTCTGCCCTGG
8mer-w6	9mer-m11.19		dual	Context_1	TCTACAGTCCGACGATCATTGCTGCGCTGACGAGTCGAACCCTATTTGGCGGTGTTGTATACAACCATCTGCCTCATAGGAGGTTCTAAAGGCTTGAACTACAGTATACAACCATCTGCCTCATTGACCAGGTGAAAGGGTTGACTCATCATAATATGGAGGATACCAATGCCCTGGCTCTGCCCTGG
8mer-w6	9mer-m11.19	A	left	Context_1	TCTACAGTCCGACGATCATTGCTGCGCTGACGAGTCGAACCCTATTTGGCGGTGTTGTATACAACCAATCTGCCTCATAGGAGGTTCTAAAGGCTTGAACTACAGTCGGACATTATTGCCCAGTTTGACCAGGTGAAAGGGTTGACTCATCATAATATGGAGGATACCAATGCCCTGGCTCTGCCCTG
8mer-w6	9mer-m11.19	A	right	Context_1	TCTACAGTCCGACGATCATTGCTGCGCTGACGAGTCGAACCCTATTTGGCGGTGTTGATATCCAGTATTTCTTACCTAGGAGGTTCTAAAGGCTTGAACTACAGTATACAACCAATCTGCCTCATTGACCAGGTGAAAGGGTTGACTCATCATAATATGGAGGATACCAATGCCCTGGCTCTGCCCTG
8mer-w6	9mer-m11.19	A	dual	Context_1	TCTACAGTCCGACGATCATTGCTGCGCTGACGAGTCGAACCCTATTTGGCGGTGTTGTATACAACCAATCTGCCTCATAGGAGGTTCTAAAGGCTTGAACTACAGTATACAACCAATCTGCCTCATTGACCAGGTGAAAGGGTTGACTCATCATAATATGGAGGATACCAATGCCCTGGCTCTGCCCT
8mer-w6	9mer-m11.19	AAAA	left	Context_1	TCTACAGTCCGACGATCATTGCTGCGCTGACGAGTCGAACCCTATTTGGCGGTGTTGTATACAACCAAAAATCTGCCTCATAGGAGGTTCTAAAGGCTTGAACTACAGTCGGACATTATTGCCCAGTTTGACCAGGTGAAAGGGTTGACTCATCATAATATGGAGGATACCAATGCCCTGGCTCTGCC
8mer-w6	9mer-m11.19	AAAA	right	Context_1	TCTACAGTCCGACGATCATTGCTGCGCTGACGAGTCGAACCCTATTTGGCGGTGTTGATATCCAGTATTTCTTACCTAGGAGGTTCTAAAGGCTTGAACTACAGTATACAACCAAAAATCTGCCTCATTGACCAGGTGAAAGGGTTGACTCATCATAATATGGAGGATACCAATGCCCTGGCTCTGCC
8mer-w6	9mer-m11.19	AAAA	dual	Context_1	TCTACAGTCCGACGATCATTGCTGCGCTGACGAGTCGAACCCTATTTGGCGGTGTTGTATACAACCAAAAATCTGCCTCATAGGAGGTTCTAAAGGCTTGAACTACAGTATACAACCAAAAATCTGCCTCATTGACCAGGTGAAAGGGTTGACTCATCATAATATGGAGGATACCAATGCCCTGGCTC
8mer-w6	9mer-m11.19	T	left	Context_1	TCTACAGTCCGACGATCATTGCTGCGCTGACGAGTCGAACCCTATTTGGCGGTGTTGTATACAACCATTCTGCCTCATAGGAGGTTCTAAAGGCTTGAACTACAGTCGGACATTATTGCCCAGTTTGACCAGGTGAAAGGGTTGACTCATCATAATATGGAGGATACCAATGCCCTGGCTCTGCCCTG
8mer-w6	9mer-m11.19	T	right	Context_1	TCTACAGTCCGACGATCATTGCTGCGCTGACGAGTCGAACCCTATTTGGCGGTGTTGATATCCAGTATTTCTTACCTAGGAGGTTCTAAAGGCTTGAACTACAGTATACAACCATTCTGCCTCATTGACCAGGTGAAAGGGTTGACTCATCATAATATGGAGGATACCAATGCCCTGGCTCTGCCCTG
8mer-w6	9mer-m11.19	T	dual	Context_1	TCTACAGTCCGACGATCATTGCTGCGCTGACGAGTCGAACCCTATTTGGCGGTGTTGTATACAACCATTCTGCCTCATAGGAGGTTCTAAAGGCTTGAACTACAGTATACAACCATTCTGCCTCATTGACCAGGTGAAAGGGTTGACTCATCATAATATGGAGGATACCAATGCCCTGGCTCTGCCCT
8mer-w6	9mer-m11.19	TTTT	left	Context_1	TCTACAGTCCGACGATCATTGCTGCGCTGACGAGTCGAACCCTATTTGGCGGTGTTGTATACAACCATTTTTCTGCCTCATAGGAGGTTCTAAAGGCTTGAACTACAGTCGGACATTATTGCCCAGTTTGACCAGGTGAAAGGGTTGACTCATCATAATATGGAGGATACCAATGCCCTGGCTCTGCC
8mer-w6	9mer-m11.19	TTTT	right	Context_1	TCTACAGTCCGACGATCATTGCTGCGCTGACGAGTCGAACCCTATTTGGCGGTGTTGATATCCAGTATTTCTTACCTAGGAGGTTCTAAAGGCTTGAACTACAGTATACAACCATTTTTCTGCCTCATTGACCAGGTGAAAGGGTTGACTCATCATAATATGGAGGATACCAATGCCCTGGCTCTGCC
8mer-w6	9mer-m11.19	TTTT	dual	Context_1	TCTACAGTCCGACGATCATTGCTGCGCTGACGAGTCGAACCCTATTTGGCGGTGTTGTATACAACCATTTTTCTGCCTCATAGGAGGTTCTAAAGGCTTGAACTACAGTATACAACCATTTTTCTGCCTCATTGACCAGGTGAAAGGGTTGACTCATCATAATATGGAGGATACCAATGCCCTGGCTC
8mer-w6	9mer-m13.21		left	Context_1	TCTACAGTCCGACGATCATTGCTGCGCTGACGAGTCGAACCCTATTTGGCGGTGTACTATACAAGTATCTGCCTCATAGGAGGTTCTAAAGGCTTGAACTACAGTCGGACATTATTGCCCAGTTTGACCAGGTGAAAGGGTTGACTCATCATAATATGGAGGATACCAATGCCCTGGCTCTGCCCTGG
8mer-w6	9mer-m13.21		right	Context_1	TCTACAGTCCGACGATCATTGCTGCGCTGACGAGTCGAACCCTATTTGGCGGTGTTGATATCCAGTATTTCTTACCTAGGAGGTTCTAAAGGCTTGAACTACACTATACAATTATCTGCCTCATTGACCAGGTGAAAGGGTTGACTCATCATAATATGGAGGATACCAATGCCCTGGCTCTGCCCTGG
8mer-w6	9mer-m13.21		dual	Context_1	TCTACAGTCCGACGATCATTGCTGCGCTGACGAGTCGAACCCTATTTGGCGGTGTACTATACAAGTATCTGCCTCATAGGAGGTTCTAAAGGCTTGAACTACACTATACAATTATCTGCCTCATTGACCAGGTGAAAGGGTTGACTCATCATAATATGGAGGATACCAATGCCCTGGCTCTGCCCTGG
8mer-w6	9mer-m13.21	A	left	Context_1	TCTACAGTCCGACGATCATTGCTGCGCTGACGAGTCGAACCCTATTTGGCGGTGTACTATACAAGTAATCTGCCTCATAGGAGGTTCTAAAGGCTTGAACTACAGTCGGACATTATTGCCCAGTTTGACCAGGTGAAAGGGTTGACTCATCATAATATGGAGGATACCAATGCCCTGGCTCTGCCCTG
8mer-w6	9mer-m13.21	A	right	Context_1	TCTACAGTCCGACGATCATTGCTGCGCTGACGAGTCGAACCCTATTTGGCGGTGTTGATATCCAGTATTTCTTACCTAGGAGGTTCTAAAGGCTTGAACTACACTATACAATTAATCTGCCTCATTGACCAGGTGAAAGGGTTGACTCATCATAATATGGAGGATACCAATGCCCTGGCTCTGCCCTG
8mer-w6	9mer-m13.21	A	dual	Context_1	TCTACAGTCCGACGATCATTGCTGCGCTGACGAGTCGAACCCTATTTGGCGGTGTACTATACAAGTAATCTGCCTCATAGGAGGTTCTAAAGGCTTGAACTACACTATACAATTAATCTGCCTCATTGACCAGGTGAAAGGGTTGACTCATCATAATATGGAGGATACCAATGCCCTGGCTCTGCCCT
8mer-w6	9mer-m13.21	AAAA	left	Context_1	TCTACAGTCCGACGATCATTGCTGCGCTGACGAGTCGAACCCTATTTGGCGGTGTACTATACAAGTAAAAATCTGCCTCATAGGAGGTTCTAAAGGCTTGAACTACAGTCGGACATTATTGCCCAGTTTGACCAGGTGAAAGGGTTGACTCATCATAATATGGAGGATACCAATGCCCTGGCTCTGCC
8mer-w6	9mer-m13.21	AAAA	right	Context_1	TCTACAGTCCGACGATCATTGCTGCGCTGACGAGTCGAACCCTATTTGGCGGTGTTGATATCCAGTATTTCTTACCTAGGAGGTTCTAAAGGCTTGAACTACACTATACAATTAAAAATCTGCCTCATTGACCAGGTGAAAGGGTTGACTCATCATAATATGGAGGATACCAATGCCCTGGCTCTGCC
8mer-w6	9mer-m13.21	AAAA	dual	Context_1	TCTACAGTCCGACGATCATTGCTGCGCTGACGAGTCGAACCCTATTTGGCGGTGTACTATACAAGTAAAAATCTGCCTCATAGGAGGTTCTAAAGGCTTGAACTACACTATACAATTAAAAATCTGCCTCATTGACCAGGTGAAAGGGTTGACTCATCATAATATGGAGGATACCAATGCCCTGGCTC
8mer-w6	9mer-m13.21	T	left	Context_1	TCTACAGTCCGACGATCATTGCTGCGCTGACGAGTCGAACCCTATTTGGCGGTGTACTATACAAGTATTCTGCCTCATAGGAGGTTCTAAAGGCTTGAACTACAGTCGGACATTATTGCCCAGTTTGACCAGGTGAAAGGGTTGACTCATCATAATATGGAGGATACCAATGCCCTGGCTCTGCCCTG
8mer-w6	9mer-m13.21	T	right	Context_1	TCTACAGTCCGACGATCATTGCTGCGCTGACGAGTCGAACCCTATTTGGCGGTGTTGATATCCAGTATTTCTTACCTAGGAGGTTCTAAAGGCTTGAACTACACTATACAATTATTCTGCCTCATTGACCAGGTGAAAGGGTTGACTCATCATAATATGGAGGATACCAATGCCCTGGCTCTGCCCTG
8mer-w6	9mer-m13.21	T	dual	Context_1	TCTACAGTCCGACGATCATTGCTGCGCTGACGAGTCGAACCCTATTTGGCGGTGTACTATACAAGTATTCTGCCTCATAGGAGGTTCTAAAGGCTTGAACTACACTATACAATTATTCTGCCTCATTGACCAGGTGAAAGGGTTGACTCATCATAATATGGAGGATACCAATGCCCTGGCTCTGCCCT
8mer-w6	9mer-m13.21	TTTT	left	Context_1	TCTACAGTCCGACGATCATTGCTGCGCTGACGAGTCGAACCCTATTTGGCGGTGTACTATACAAGTATTTTTCTGCCTCATAGGAGGTTCTAAAGGCTTGAACTACAGTCGGACATTATTGCCCAGTTTGACCAGGTGAAAGGGTTGACTCATCATAATATGGAGGATACCAATGCCCTGGCTCTGCC
8mer-w6	9mer-m13.21	TTTT	right	Context_1	TCTACAGTCCGACGATCATTGCTGCGCTGACGAGTCGAACCCTATTTGGCGGTGTTGATATCCAGTATTTCTTACCTAGGAGGTTCTAAAGGCTTGAACTACACTATACAATTATTTTTCTGCCTCATTGACCAGGTGAAAGGGTTGACTCATCATAATATGGAGGATACCAATGCCCTGGCTCTGCC
8mer-w6	9mer-m13.21	TTTT	dual	Context_1	TCTACAGTCCGACGATCATTGCTGCGCTGACGAGTCGAACCCTATTTGGCGGTGTACTATACAAGTATTTTTCTGCCTCATAGGAGGTTCTAAAGGCTTGAACTACACTATACAATTATTTTTCTGCCTCATTGACCAGGTGAAAGGGTTGACTCATCATAATATGGAGGATACCAATGCCCTGGCTC
No_site_0				Context_1	TCTACAGTCCGACGATCATTGCTGCGCTGACGAGTCGAACCCTATTTGGCGGTGTTGATATCCAGTATTTCTTACCTAGGAGGTTCTAAAGGCTTGAACTACAGTCGGACATTATTGCCCAGTTTGACCAGGTGAAAGGGTTGACTCATCATAATATGGAGGATACCAATGCCCTGGCTCTGCCCTGG
No_site_1				Context_1	TCTACAGTCCGACGATCATTGCTGCGCTGACGAGTCGAACCCTATTTGGCGGTGTTTCAGGGTTTTAACAAGGCGTTAGGAGGTTCTAAAGGCTTGAACTACAAGGCCCGCCGATGAGGGCAATTGACCAGGTGAAAGGGTTGACTCATCATAATATGGAGGATACCAATGCCCTGGCTCTGCCCTGG
No_site_2				Context_1	TCTACAGTCCGACGATCATTGCTGCGCTGACGAGTCGAACCCTATTTGGCGGTGTTCTGTAGGTATAAAATGTGGCTAGGAGGTTCTAAAGGCTTGAACTACAGGGGTGTTCCTGAGGGAAGTTTGACCAGGTGAAAGGGTTGACTCATCATAATATGGAGGATACCAATGCCCTGGCTCTGCCCTGG
No_site_3				Context_1	TCTACAGTCCGACGATCATTGCTGCGCTGACGAGTCGAACCCTATTTGGCGGTGTTTGAGCTGGTTTTGAAAGGCCTAGGAGGTTCTAAAGGCTTGAACTACAAAGTTAAATTTTTGTTTCAATTGACCAGGTGAAAGGGTTGACTCATCATAATATGGAGGATACCAATGCCCTGGCTCTGCCCTGG
No_site_4				Context_1	TCTACAGTCCGACGATCATTGCTGCGCTGACGAGTCGAACCCTATTTGGCGGTGTTAAAGTCTTTTTTGGGGGAGTTAGGAGGTTCTAAAGGCTTGAACTACAGGCCATGATTGCAGTAGATCTTGACCAGGTGAAAGGGTTGACTCATCATAATATGGAGGATACCAATGCCCTGGCTCTGCCCTGG
No_site_5				Context_1	TCTACAGTCCGACGATCATTGCTGCGCTGACGAGTCGAACCCTATTTGGCGGTGTTGATCATATAAAAAGTCTCCCTAGGAGGTTCTAAAGGCTTGAACTACAGGGCACTTTCTGGACAGTTATTGACCAGGTGAAAGGGTTGACTCATCATAATATGGAGGATACCAATGCCCTGGCTCTGCCCTGG
No_site_6				Context_1	TCTACAGTCCGACGATCATTGCTGCGCTGACGAGTCGAACCCTATTTGGCGGTGTTTAGTTGGCTTTTCACCAAACTAGGAGGTTCTAAAGGCTTGAACTACACTTAATCGGTTGTGATCAAATTGACCAGGTGAAAGGGTTGACTCATCATAATATGGAGGATACCAATGCCCTGGCTCTGCCCTGG
lin-41	9mer-m11.19	T	dual	Context_2	TCTACAGTCCGACGATCACATCTGGTTTTTCTTACTCACTGAAGCAACTCACACCCGTATACAACCATTCTACACTCATAGGTCTTTCCGAAGGGCATTTAAGTATTATACAACCATTCTGCCTCTTGGTGCCCTTTGTGACCTTGTAGGCATGCTGCCCTAGAATTACCAATGCCCTGGCTCTGCCC
8mer			left	Context_2	TCTACAGTCCGACGATCACATCTGGTTTTTCTTACTCACTGAAGCAACTCACACCCGAGATTGGAAATCTACCTCATAGGTCTTTCCGAAGGGCATTTAAGTATCTGCAAGAAATGTGCCAGTTGGTGCCCTTTGTGACCTTGTAGGCATGCTGCCCTAGAATTACCAATGCCCTGGCTCTGCCCTGG
8mer			right	Context_2	TCTACAGTCCGACGATCACATCTGGTTTTTCTTACTCACTGAAGCAACTCACACCCGAGATTGGAAATTTTCCTTTTAGGTCTTTCCGAAGGGCATTTAAGTATCTGCAAGAAATCTACCTCATGGTGCCCTTTGTGACCTTGTAGGCATGCTGCCCTAGAATTACCAATGCCCTGGCTCTGCCCTGG
8mer			dual	Context_2	TCTACAGTCCGACGATCACATCTGGTTTTTCTTACTCACTGAAGCAACTCACACCCGAGATTGGAAATCTACCTCATAGGTCTTTCCGAAGGGCATTTAAGTATCTGCAAGAAATCTACCTCATGGTGCCCTTTGTGACCTTGTAGGCATGCTGCCCTAGAATTACCAATGCCCTGGCTCTGCCCTGG
7mer-m8			left	Context_2	TCTACAGTCCGACGATCACATCTGGTTTTTCTTACTCACTGAAGCAACTCACACCCGAGATTGGAAATCTACCTCTTAGGTCTTTCCGAAGGGCATTTAAGTATCTGCAAGAAATGTGCCAGTTGGTGCCCTTTGTGACCTTGTAGGCATGCTGCCCTAGAATTACCAATGCCCTGGCTCTGCCCTGG
7mer-m8			right	Context_2	TCTACAGTCCGACGATCACATCTGGTTTTTCTTACTCACTGAAGCAACTCACACCCGAGATTGGAAATTTTCCTTTTAGGTCTTTCCGAAGGGCATTTAAGTATCTGCAAGAAATCTACCTCTTGGTGCCCTTTGTGACCTTGTAGGCATGCTGCCCTAGAATTACCAATGCCCTGGCTCTGCCCTGG
7mer-m8			dual	Context_2	TCTACAGTCCGACGATCACATCTGGTTTTTCTTACTCACTGAAGCAACTCACACCCGAGATTGGAAATCTACCTCTTAGGTCTTTCCGAAGGGCATTTAAGTATCTGCAAGAAATCTACCTCTTGGTGCCCTTTGTGACCTTGTAGGCATGCTGCCCTAGAATTACCAATGCCCTGGCTCTGCCCTGG
7mer-A1			left	Context_2	TCTACAGTCCGACGATCACATCTGGTTTTTCTTACTCACTGAAGCAACTCACACCCGAGATTGGAAATTTACCTCATAGGTCTTTCCGAAGGGCATTTAAGTATCTGCAAGAAATGTGCCAGTTGGTGCCCTTTGTGACCTTGTAGGCATGCTGCCCTAGAATTACCAATGCCCTGGCTCTGCCCTGG
7mer-A1			right	Context_2	TCTACAGTCCGACGATCACATCTGGTTTTTCTTACTCACTGAAGCAACTCACACCCGAGATTGGAAATTTTCCTTTTAGGTCTTTCCGAAGGGCATTTAAGTATCTGCAAGAAATGTACCTCATGGTGCCCTTTGTGACCTTGTAGGCATGCTGCCCTAGAATTACCAATGCCCTGGCTCTGCCCTGG
7mer-A1			dual	Context_2	TCTACAGTCCGACGATCACATCTGGTTTTTCTTACTCACTGAAGCAACTCACACCCGAGATTGGAAATTTACCTCATAGGTCTTTCCGAAGGGCATTTAAGTATCTGCAAGAAATGTACCTCATGGTGCCCTTTGTGACCTTGTAGGCATGCTGCCCTAGAATTACCAATGCCCTGGCTCTGCCCTGG
6mer			left	Context_2	TCTACAGTCCGACGATCACATCTGGTTTTTCTTACTCACTGAAGCAACTCACACCCGAGATTGGAAATTTACCTCTTAGGTCTTTCCGAAGGGCATTTAAGTATCTGCAAGAAATGTGCCAGTTGGTGCCCTTTGTGACCTTGTAGGCATGCTGCCCTAGAATTACCAATGCCCTGGCTCTGCCCTGG
6mer			right	Context_2	TCTACAGTCCGACGATCACATCTGGTTTTTCTTACTCACTGAAGCAACTCACACCCGAGATTGGAAATTTTCCTTTTAGGTCTTTCCGAAGGGCATTTAAGTATCTGCAAGAAATGTACCTCTTGGTGCCCTTTGTGACCTTGTAGGCATGCTGCCCTAGAATTACCAATGCCCTGGCTCTGCCCTGG
6mer			dual	Context_2	TCTACAGTCCGACGATCACATCTGGTTTTTCTTACTCACTGAAGCAACTCACACCCGAGATTGGAAATTTACCTCTTAGGTCTTTCCGAAGGGCATTTAAGTATCTGCAAGAAATGTACCTCTTGGTGCCCTTTGTGACCTTGTAGGCATGCTGCCCTAGAATTACCAATGCCCTGGCTCTGCCCTGG
8mer-w6			left	Context_2	TCTACAGTCCGACGATCACATCTGGTTTTTCTTACTCACTGAAGCAACTCACACCCGAGATTGGAAATCTGCCTCATAGGTCTTTCCGAAGGGCATTTAAGTATCTGCAAGAAATGTGCCAGTTGGTGCCCTTTGTGACCTTGTAGGCATGCTGCCCTAGAATTACCAATGCCCTGGCTCTGCCCTGG
8mer-w6			right	Context_2	TCTACAGTCCGACGATCACATCTGGTTTTTCTTACTCACTGAAGCAACTCACACCCGAGATTGGAAATTTTCCTTTTAGGTCTTTCCGAAGGGCATTTAAGTATCTGCAAGAAATCTGCCTCATGGTGCCCTTTGTGACCTTGTAGGCATGCTGCCCTAGAATTACCAATGCCCTGGCTCTGCCCTGG
8mer-w6			dual	Context_2	TCTACAGTCCGACGATCACATCTGGTTTTTCTTACTCACTGAAGCAACTCACACCCGAGATTGGAAATCTGCCTCATAGGTCTTTCCGAAGGGCATTTAAGTATCTGCAAGAAATCTGCCTCATGGTGCCCTTTGTGACCTTGTAGGCATGCTGCCCTAGAATTACCAATGCCCTGGCTCTGCCCTGG
8mer-w6	4mer-m13.16		left	Context_2	TCTACAGTCCGACGATCACATCTGGTTTTTCTTACTCACTGAAGCAACTCACACCCGAGAACAAAAATCTGCCTCATAGGTCTTTCCGAAGGGCATTTAAGTATCTGCAAGAAATGTGCCAGTTGGTGCCCTTTGTGACCTTGTAGGCATGCTGCCCTAGAATTACCAATGCCCTGGCTCTGCCCTGG
8mer-w6	4mer-m13.16		right	Context_2	TCTACAGTCCGACGATCACATCTGGTTTTTCTTACTCACTGAAGCAACTCACACCCGAGATTGGAAATTTTCCTTTTAGGTCTTTCCGAAGGGCATTTAAGTATCTGACAAAAATCTGCCTCATGGTGCCCTTTGTGACCTTGTAGGCATGCTGCCCTAGAATTACCAATGCCCTGGCTCTGCCCTGG
8mer-w6	4mer-m13.16		dual	Context_2	TCTACAGTCCGACGATCACATCTGGTTTTTCTTACTCACTGAAGCAACTCACACCCGAGAACAAAAATCTGCCTCATAGGTCTTTCCGAAGGGCATTTAAGTATCTGACAAAAATCTGCCTCATGGTGCCCTTTGTGACCTTGTAGGCATGCTGCCCTAGAATTACCAATGCCCTGGCTCTGCCCTGG
8mer-w6	4mer-m13.16	A	left	Context_2	TCTACAGTCCGACGATCACATCTGGTTTTTCTTACTCACTGAAGCAACTCACACCCGAGAACAAAAAATCTGCCTCATAGGTCTTTCCGAAGGGCATTTAAGTATCTGCAAGAAATGTGCCAGTTGGTGCCCTTTGTGACCTTGTAGGCATGCTGCCCTAGAATTACCAATGCCCTGGCTCTGCCCTG
8mer-w6	4mer-m13.16	A	right	Context_2	TCTACAGTCCGACGATCACATCTGGTTTTTCTTACTCACTGAAGCAACTCACACCCGAGATTGGAAATTTTCCTTTTAGGTCTTTCCGAAGGGCATTTAAGTATCTGACAAAAAATCTGCCTCATGGTGCCCTTTGTGACCTTGTAGGCATGCTGCCCTAGAATTACCAATGCCCTGGCTCTGCCCTG
8mer-w6	4mer-m13.16	A	dual	Context_2	TCTACAGTCCGACGATCACATCTGGTTTTTCTTACTCACTGAAGCAACTCACACCCGAGAACAAAAAATCTGCCTCATAGGTCTTTCCGAAGGGCATTTAAGTATCTGACAAAAAATCTGCCTCATGGTGCCCTTTGTGACCTTGTAGGCATGCTGCCCTAGAATTACCAATGCCCTGGCTCTGCCCT
8mer-w6	4mer-m13.16	AAAA	left	Context_2	TCTACAGTCCGACGATCACATCTGGTTTTTCTTACTCACTGAAGCAACTCACACCCGAGAACAAAAAAAAATCTGCCTCATAGGTCTTTCCGAAGGGCATTTAAGTATCTGCAAGAAATGTGCCAGTTGGTGCCCTTTGTGACCTTGTAGGCATGCTGCCCTAGAATTACCAATGCCCTGGCTCTGCC
8mer-w6	4mer-m13.16	AAAA	right	Context_2	TCTACAGTCCGACGATCACATCTGGTTTTTCTTACTCACTGAAGCAACTCACACCCGAGATTGGAAATTTTCCTTTTAGGTCTTTCCGAAGGGCATTTAAGTATCTGACAAAAAAAAATCTGCCTCATGGTGCCCTTTGTGACCTTGTAGGCATGCTGCCCTAGAATTACCAATGCCCTGGCTCTGCC
8mer-w6	4mer-m13.16	AAAA	dual	Context_2	TCTACAGTCCGACGATCACATCTGGTTTTTCTTACTCACTGAAGCAACTCACACCCGAGAACAAAAAAAAATCTGCCTCATAGGTCTTTCCGAAGGGCATTTAAGTATCTGACAAAAAAAAATCTGCCTCATGGTGCCCTTTGTGACCTTGTAGGCATGCTGCCCTAGAATTACCAATGCCCTGGCTC
8mer-w6	4mer-m13.16	T	left	Context_2	TCTACAGTCCGACGATCACATCTGGTTTTTCTTACTCACTGAAGCAACTCACACCCGAGAACAAAAATTCTGCCTCATAGGTCTTTCCGAAGGGCATTTAAGTATCTGCAAGAAATGTGCCAGTTGGTGCCCTTTGTGACCTTGTAGGCATGCTGCCCTAGAATTACCAATGCCCTGGCTCTGCCCTG
8mer-w6	4mer-m13.16	T	right	Context_2	TCTACAGTCCGACGATCACATCTGGTTTTTCTTACTCACTGAAGCAACTCACACCCGAGATTGGAAATTTTCCTTTTAGGTCTTTCCGAAGGGCATTTAAGTATCTGACAAAAATTCTGCCTCATGGTGCCCTTTGTGACCTTGTAGGCATGCTGCCCTAGAATTACCAATGCCCTGGCTCTGCCCTG
8mer-w6	4mer-m13.16	T	dual	Context_2	TCTACAGTCCGACGATCACATCTGGTTTTTCTTACTCACTGAAGCAACTCACACCCGAGAACAAAAATTCTGCCTCATAGGTCTTTCCGAAGGGCATTTAAGTATCTGACAAAAATTCTGCCTCATGGTGCCCTTTGTGACCTTGTAGGCATGCTGCCCTAGAATTACCAATGCCCTGGCTCTGCCCT
8mer-w6	4mer-m13.16	TTTT	left	Context_2	TCTACAGTCCGACGATCACATCTGGTTTTTCTTACTCACTGAAGCAACTCACACCCGAGAACAAAAATTTTTCTGCCTCATAGGTCTTTCCGAAGGGCATTTAAGTATCTGCAAGAAATGTGCCAGTTGGTGCCCTTTGTGACCTTGTAGGCATGCTGCCCTAGAATTACCAATGCCCTGGCTCTGCC
8mer-w6	4mer-m13.16	TTTT	right	Context_2	TCTACAGTCCGACGATCACATCTGGTTTTTCTTACTCACTGAAGCAACTCACACCCGAGATTGGAAATTTTCCTTTTAGGTCTTTCCGAAGGGCATTTAAGTATCTGACAAAAATTTTTCTGCCTCATGGTGCCCTTTGTGACCTTGTAGGCATGCTGCCCTAGAATTACCAATGCCCTGGCTCTGCC
8mer-w6	4mer-m13.16	TTTT	dual	Context_2	TCTACAGTCCGACGATCACATCTGGTTTTTCTTACTCACTGAAGCAACTCACACCCGAGAACAAAAATTTTTCTGCCTCATAGGTCTTTCCGAAGGGCATTTAAGTATCTGACAAAAATTTTTCTGCCTCATGGTGCCCTTTGTGACCTTGTAGGCATGCTGCCCTAGAATTACCAATGCCCTGGCTC
8mer-w6	9mer-m11.19		left	Context_2	TCTACAGTCCGACGATCACATCTGGTTTTTCTTACTCACTGAAGCAACTCACACCCGTATACAACCATCTGCCTCATAGGTCTTTCCGAAGGGCATTTAAGTATCTGCAAGAAATGTGCCAGTTGGTGCCCTTTGTGACCTTGTAGGCATGCTGCCCTAGAATTACCAATGCCCTGGCTCTGCCCTGG
8mer-w6	9mer-m11.19		right	Context_2	TCTACAGTCCGACGATCACATCTGGTTTTTCTTACTCACTGAAGCAACTCACACCCGAGATTGGAAATTTTCCTTTTAGGTCTTTCCGAAGGGCATTTAAGTATTATACAACCATCTGCCTCATGGTGCCCTTTGTGACCTTGTAGGCATGCTGCCCTAGAATTACCAATGCCCTGGCTCTGCCCTGG
8mer-w6	9mer-m11.19		dual	Context_2	TCTACAGTCCGACGATCACATCTGGTTTTTCTTACTCACTGAAGCAACTCACACCCGTATACAACCATCTGCCTCATAGGTCTTTCCGAAGGGCATTTAAGTATTATACAACCATCTGCCTCATGGTGCCCTTTGTGACCTTGTAGGCATGCTGCCCTAGAATTACCAATGCCCTGGCTCTGCCCTGG
8mer-w6	9mer-m11.19	A	left	Context_2	TCTACAGTCCGACGATCACATCTGGTTTTTCTTACTCACTGAAGCAACTCACACCCGTATACAACCAATCTGCCTCATAGGTCTTTCCGAAGGGCATTTAAGTATCTGCAAGAAATGTGCCAGTTGGTGCCCTTTGTGACCTTGTAGGCATGCTGCCCTAGAATTACCAATGCCCTGGCTCTGCCCTG
8mer-w6	9mer-m11.19	A	right	Context_2	TCTACAGTCCGACGATCACATCTGGTTTTTCTTACTCACTGAAGCAACTCACACCCGAGATTGGAAATTTTCCTTTTAGGTCTTTCCGAAGGGCATTTAAGTATTATACAACCAATCTGCCTCATGGTGCCCTTTGTGACCTTGTAGGCATGCTGCCCTAGAATTACCAATGCCCTGGCTCTGCCCTG
8mer-w6	9mer-m11.19	A	dual	Context_2	TCTACAGTCCGACGATCACATCTGGTTTTTCTTACTCACTGAAGCAACTCACACCCGTATACAACCAATCTGCCTCATAGGTCTTTCCGAAGGGCATTTAAGTATTATACAACCAATCTGCCTCATGGTGCCCTTTGTGACCTTGTAGGCATGCTGCCCTAGAATTACCAATGCCCTGGCTCTGCCCT
8mer-w6	9mer-m11.19	AAAA	left	Context_2	TCTACAGTCCGACGATCACATCTGGTTTTTCTTACTCACTGAAGCAACTCACACCCGTATACAACCAAAAATCTGCCTCATAGGTCTTTCCGAAGGGCATTTAAGTATCTGCAAGAAATGTGCCAGTTGGTGCCCTTTGTGACCTTGTAGGCATGCTGCCCTAGAATTACCAATGCCCTGGCTCTGCC
8mer-w6	9mer-m11.19	AAAA	right	Context_2	TCTACAGTCCGACGATCACATCTGGTTTTTCTTACTCACTGAAGCAACTCACACCCGAGATTGGAAATTTTCCTTTTAGGTCTTTCCGAAGGGCATTTAAGTATTATACAACCAAAAATCTGCCTCATGGTGCCCTTTGTGACCTTGTAGGCATGCTGCCCTAGAATTACCAATGCCCTGGCTCTGCC
8mer-w6	9mer-m11.19	AAAA	dual	Context_2	TCTACAGTCCGACGATCACATCTGGTTTTTCTTACTCACTGAAGCAACTCACACCCGTATACAACCAAAAATCTGCCTCATAGGTCTTTCCGAAGGGCATTTAAGTATTATACAACCAAAAATCTGCCTCATGGTGCCCTTTGTGACCTTGTAGGCATGCTGCCCTAGAATTACCAATGCCCTGGCTC
8mer-w6	9mer-m11.19	T	left	Context_2	TCTACAGTCCGACGATCACATCTGGTTTTTCTTACTCACTGAAGCAACTCACACCCGTATACAACCATTCTGCCTCATAGGTCTTTCCGAAGGGCATTTAAGTATCTGCAAGAAATGTGCCAGTTGGTGCCCTTTGTGACCTTGTAGGCATGCTGCCCTAGAATTACCAATGCCCTGGCTCTGCCCTG
8mer-w6	9mer-m11.19	T	right	Context_2	TCTACAGTCCGACGATCACATCTGGTTTTTCTTACTCACTGAAGCAACTCACACCCGAGATTGGAAATTTTCCTTTTAGGTCTTTCCGAAGGGCATTTAAGTATTATACAACCATTCTGCCTCATGGTGCCCTTTGTGACCTTGTAGGCATGCTGCCCTAGAATTACCAATGCCCTGGCTCTGCCCTG
8mer-w6	9mer-m11.19	T	dual	Context_2	TCTACAGTCCGACGATCACATCTGGTTTTTCTTACTCACTGAAGCAACTCACACCCGTATACAACCATTCTGCCTCATAGGTCTTTCCGAAGGGCATTTAAGTATTATACAACCATTCTGCCTCATGGTGCCCTTTGTGACCTTGTAGGCATGCTGCCCTAGAATTACCAATGCCCTGGCTCTGCCCT
8mer-w6	9mer-m11.19	TTTT	left	Context_2	TCTACAGTCCGACGATCACATCTGGTTTTTCTTACTCACTGAAGCAACTCACACCCGTATACAACCATTTTTCTGCCTCATAGGTCTTTCCGAAGGGCATTTAAGTATCTGCAAGAAATGTGCCAGTTGGTGCCCTTTGTGACCTTGTAGGCATGCTGCCCTAGAATTACCAATGCCCTGGCTCTGCC
8mer-w6	9mer-m11.19	TTTT	right	Context_2	TCTACAGTCCGACGATCACATCTGGTTTTTCTTACTCACTGAAGCAACTCACACCCGAGATTGGAAATTTTCCTTTTAGGTCTTTCCGAAGGGCATTTAAGTATTATACAACCATTTTTCTGCCTCATGGTGCCCTTTGTGACCTTGTAGGCATGCTGCCCTAGAATTACCAATGCCCTGGCTCTGCC
8mer-w6	9mer-m11.19	TTTT	dual	Context_2	TCTACAGTCCGACGATCACATCTGGTTTTTCTTACTCACTGAAGCAACTCACACCCGTATACAACCATTTTTCTGCCTCATAGGTCTTTCCGAAGGGCATTTAAGTATTATACAACCATTTTTCTGCCTCATGGTGCCCTTTGTGACCTTGTAGGCATGCTGCCCTAGAATTACCAATGCCCTGGCTC
8mer-w6	9mer-m13.21		left	Context_2	TCTACAGTCCGACGATCACATCTGGTTTTTCTTACTCACTGAAGCAACTCACACCACTATACAAAAATCTGCCTCATAGGTCTTTCCGAAGGGCATTTAAGTATCTGCAAGAAATGTGCCAGTTGGTGCCCTTTGTGACCTTGTAGGCATGCTGCCCTAGAATTACCAATGCCCTGGCTCTGCCCTGG
8mer-w6	9mer-m13.21		right	Context_2	TCTACAGTCCGACGATCACATCTGGTTTTTCTTACTCACTGAAGCAACTCACACCCGAGATTGGAAATTTTCCTTTTAGGTCTTTCCGAAGGGCATTTAAGTACTATACAAAAATCTGCCTCATGGTGCCCTTTGTGACCTTGTAGGCATGCTGCCCTAGAATTACCAATGCCCTGGCTCTGCCCTGG
8mer-w6	9mer-m13.21		dual	Context_2	TCTACAGTCCGACGATCACATCTGGTTTTTCTTACTCACTGAAGCAACTCACACCACTATACAAAAATCTGCCTCATAGGTCTTTCCGAAGGGCATTTAAGTACTATACAAAAATCTGCCTCATGGTGCCCTTTGTGACCTTGTAGGCATGCTGCCCTAGAATTACCAATGCCCTGGCTCTGCCCTGG
8mer-w6	9mer-m13.21	A	left	Context_2	TCTACAGTCCGACGATCACATCTGGTTTTTCTTACTCACTGAAGCAACTCACACCACTATACAAAAAATCTGCCTCATAGGTCTTTCCGAAGGGCATTTAAGTATCTGCAAGAAATGTGCCAGTTGGTGCCCTTTGTGACCTTGTAGGCATGCTGCCCTAGAATTACCAATGCCCTGGCTCTGCCCTG
8mer-w6	9mer-m13.21	A	right	Context_2	TCTACAGTCCGACGATCACATCTGGTTTTTCTTACTCACTGAAGCAACTCACACCCGAGATTGGAAATTTTCCTTTTAGGTCTTTCCGAAGGGCATTTAAGTACTATACAAAAAATCTGCCTCATGGTGCCCTTTGTGACCTTGTAGGCATGCTGCCCTAGAATTACCAATGCCCTGGCTCTGCCCTG
8mer-w6	9mer-m13.21	A	dual	Context_2	TCTACAGTCCGACGATCACATCTGGTTTTTCTTACTCACTGAAGCAACTCACACCACTATACAAAAAATCTGCCTCATAGGTCTTTCCGAAGGGCATTTAAGTACTATACAAAAAATCTGCCTCATGGTGCCCTTTGTGACCTTGTAGGCATGCTGCCCTAGAATTACCAATGCCCTGGCTCTGCCCT
8mer-w6	9mer-m13.21	AAAA	left	Context_2	TCTACAGTCCGACGATCACATCTGGTTTTTCTTACTCACTGAAGCAACTCACACCACTATACAAAAAAAAATCTGCCTCATAGGTCTTTCCGAAGGGCATTTAAGTATCTGCAAGAAATGTGCCAGTTGGTGCCCTTTGTGACCTTGTAGGCATGCTGCCCTAGAATTACCAATGCCCTGGCTCTGCC
8mer-w6	9mer-m13.21	AAAA	right	Context_2	TCTACAGTCCGACGATCACATCTGGTTTTTCTTACTCACTGAAGCAACTCACACCCGAGATTGGAAATTTTCCTTTTAGGTCTTTCCGAAGGGCATTTAAGTACTATACAAAAAAAAATCTGCCTCATGGTGCCCTTTGTGACCTTGTAGGCATGCTGCCCTAGAATTACCAATGCCCTGGCTCTGCC
8mer-w6	9mer-m13.21	AAAA	dual	Context_2	TCTACAGTCCGACGATCACATCTGGTTTTTCTTACTCACTGAAGCAACTCACACCACTATACAAAAAAAAATCTGCCTCATAGGTCTTTCCGAAGGGCATTTAAGTACTATACAAAAAAAAATCTGCCTCATGGTGCCCTTTGTGACCTTGTAGGCATGCTGCCCTAGAATTACCAATGCCCTGGCTC
8mer-w6	9mer-m13.21	T	left	Context_2	TCTACAGTCCGACGATCACATCTGGTTTTTCTTACTCACTGAAGCAACTCACACCACTATACAAAAATTCTGCCTCATAGGTCTTTCCGAAGGGCATTTAAGTATCTGCAAGAAATGTGCCAGTTGGTGCCCTTTGTGACCTTGTAGGCATGCTGCCCTAGAATTACCAATGCCCTGGCTCTGCCCTG
8mer-w6	9mer-m13.21	T	right	Context_2	TCTACAGTCCGACGATCACATCTGGTTTTTCTTACTCACTGAAGCAACTCACACCCGAGATTGGAAATTTTCCTTTTAGGTCTTTCCGAAGGGCATTTAAGTACTATACAAAAATTCTGCCTCATGGTGCCCTTTGTGACCTTGTAGGCATGCTGCCCTAGAATTACCAATGCCCTGGCTCTGCCCTG
8mer-w6	9mer-m13.21	T	dual	Context_2	TCTACAGTCCGACGATCACATCTGGTTTTTCTTACTCACTGAAGCAACTCACACCACTATACAAAAATTCTGCCTCATAGGTCTTTCCGAAGGGCATTTAAGTACTATACAAAAATTCTGCCTCATGGTGCCCTTTGTGACCTTGTAGGCATGCTGCCCTAGAATTACCAATGCCCTGGCTCTGCCCT
8mer-w6	9mer-m13.21	TTTT	left	Context_2	TCTACAGTCCGACGATCACATCTGGTTTTTCTTACTCACTGAAGCAACTCACACCACTATACAAAAATTTTTCTGCCTCATAGGTCTTTCCGAAGGGCATTTAAGTATCTGCAAGAAATGTGCCAGTTGGTGCCCTTTGTGACCTTGTAGGCATGCTGCCCTAGAATTACCAATGCCCTGGCTCTGCC
8mer-w6	9mer-m13.21	TTTT	right	Context_2	TCTACAGTCCGACGATCACATCTGGTTTTTCTTACTCACTGAAGCAACTCACACCCGAGATTGGAAATTTTCCTTTTAGGTCTTTCCGAAGGGCATTTAAGTACTATACAAAAATTTTTCTGCCTCATGGTGCCCTTTGTGACCTTGTAGGCATGCTGCCCTAGAATTACCAATGCCCTGGCTCTGCC
8mer-w6	9mer-m13.21	TTTT	dual	Context_2	TCTACAGTCCGACGATCACATCTGGTTTTTCTTACTCACTGAAGCAACTCACACCACTATACAAAAATTTTTCTGCCTCATAGGTCTTTCCGAAGGGCATTTAAGTACTATACAAAAATTTTTCTGCCTCATGGTGCCCTTTGTGACCTTGTAGGCATGCTGCCCTAGAATTACCAATGCCCTGGCTC
No_site_0				Context_2	TCTACAGTCCGACGATCACATCTGGTTTTTCTTACTCACTGAAGCAACTCACACCCGAGATTGGAAATTTTCCTTTTAGGTCTTTCCGAAGGGCATTTAAGTATCTGCAAGAAATGTGCCAGTTGGTGCCCTTTGTGACCTTGTAGGCATGCTGCCCTAGAATTACCAATGCCCTGGCTCTGCCCTGG
No_site_1				Context_2	TCTACAGTCCGACGATCACATCTGGTTTTTCTTACTCACTGAAGCAACTCACACCCCATCAGTCTTTTCCAAGGGTTAGGTCTTTCCGAAGGGCATTTAAGTAGCATCTTTTAAAACAGTGCCTGGTGCCCTTTGTGACCTTGTAGGCATGCTGCCCTAGAATTACCAATGCCCTGGCTCTGCCCTGG
No_site_2				Context_2	TCTACAGTCCGACGATCACATCTGGTTTTTCTTACTCACTGAAGCAACTCACACCCCCTAACCCATTTGCTTTTGGTAGGTCTTTCCGAAGGGCATTTAAGTATTACATAGACCCAGACAGTTTGGTGCCCTTTGTGACCTTGTAGGCATGCTGCCCTAGAATTACCAATGCCCTGGCTCTGCCCTGG
No_site_3				Context_2	TCTACAGTCCGACGATCACATCTGGTTTTTCTTACTCACTGAAGCAACTCACACCCAAAAGGTAATTTAACTAGGATAGGTCTTTCCGAAGGGCATTTAAGTAATTGTCTCTGACTCTGGGGTTGGTGCCCTTTGTGACCTTGTAGGCATGCTGCCCTAGAATTACCAATGCCCTGGCTCTGCCCTGG
No_site_4				Context_2	TCTACAGTCCGACGATCACATCTGGTTTTTCTTACTCACTGAAGCAACTCACACCCCATGAGTCATTTAAGACAAGTAGGTCTTTCCGAAGGGCATTTAAGTAGGGCAAAGCACGAAATTTTGTGGTGCCCTTTGTGACCTTGTAGGCATGCTGCCCTAGAATTACCAATGCCCTGGCTCTGCCCTGG
No_site_5				Context_2	TCTACAGTCCGACGATCACATCTGGTTTTTCTTACTCACTGAAGCAACTCACACCCGGAGTTATTTTAGATCTTGGTAGGTCTTTCCGAAGGGCATTTAAGTACTGACCTTGGTGCAGATGGCTGGTGCCCTTTGTGACCTTGTAGGCATGCTGCCCTAGAATTACCAATGCCCTGGCTCTGCCCTGG
No_site_6				Context_2	TCTACAGTCCGACGATCACATCTGGTTTTTCTTACTCACTGAAGCAACTCACACCCATAAAATTAAAAACATCACCTAGGTCTTTCCGAAGGGCATTTAAGTATGCATGAAAAGACTCAGTTGTGGTGCCCTTTGTGACCTTGTAGGCATGCTGCCCTAGAATTACCAATGCCCTGGCTCTGCCCTGG
lin-41	9mer-m11.19	T	dual	Context_3	TCTACAGTCCGACGATCCTTCATTTGGTGGAGCTTTAACCTTATGCTGGAAAGTCTGTATACAACCATTCTACACTCATAGGACCTCCATAACCTTACATAAATATTATACAACCATTCTGCCTCTGAGCTTTTTACAAGCTCACAGCCCAGGGCATTGCAGCCTTTACCAATGCCCTGGCTCTGCCC
8mer			left	Context_3	TCTACAGTCCGACGATCCTTCATTTGGTGGAGCTTTAACCTTATGCTGGAAAGTCTGAGACCCTTTATCTACCTCATAGGACCTCCATAACCTTACATAAATATTTGTTCGAAATGACGGACTGAGCTTTTTACAAGCTCACAGCCCAGGGCATTGCAGCCTTTACCAATGCCCTGGCTCTGCCCTGG
8mer			right	Context_3	TCTACAGTCCGACGATCCTTCATTTGGTGGAGCTTTAACCTTATGCTGGAAAGTCTGAGACCCTTTATGAAAAGGCTAGGACCTCCATAACCTTACATAAATATTTGTTCGAAATCTACCTCAGAGCTTTTTACAAGCTCACAGCCCAGGGCATTGCAGCCTTTACCAATGCCCTGGCTCTGCCCTGG
8mer			dual	Context_3	TCTACAGTCCGACGATCCTTCATTTGGTGGAGCTTTAACCTTATGCTGGAAAGTCTGAGACCCTTTATCTACCTCATAGGACCTCCATAACCTTACATAAATATTTGTTCGAAATCTACCTCAGAGCTTTTTACAAGCTCACAGCCCAGGGCATTGCAGCCTTTACCAATGCCCTGGCTCTGCCCTGG
7mer-m8			left	Context_3	TCTACAGTCCGACGATCCTTCATTTGGTGGAGCTTTAACCTTATGCTGGAAAGTCTGAGACCCTTTATCTACCTCCTAGGACCTCCATAACCTTACATAAATATTTGTTCGAAATGACGGACTGAGCTTTTTACAAGCTCACAGCCCAGGGCATTGCAGCCTTTACCAATGCCCTGGCTCTGCCCTGG
7mer-m8			right	Context_3	TCTACAGTCCGACGATCCTTCATTTGGTGGAGCTTTAACCTTATGCTGGAAAGTCTGAGACCCTTTATGAAAAGGCTAGGACCTCCATAACCTTACATAAATATTTGTTCGAAATCTACCTCTGAGCTTTTTACAAGCTCACAGCCCAGGGCATTGCAGCCTTTACCAATGCCCTGGCTCTGCCCTGG
7mer-m8			dual	Context_3	TCTACAGTCCGACGATCCTTCATTTGGTGGAGCTTTAACCTTATGCTGGAAAGTCTGAGACCCTTTATCTACCTCCTAGGACCTCCATAACCTTACATAAATATTTGTTCGAAATCTACCTCTGAGCTTTTTACAAGCTCACAGCCCAGGGCATTGCAGCCTTTACCAATGCCCTGGCTCTGCCCTGG
7mer-A1			left	Context_3	TCTACAGTCCGACGATCCTTCATTTGGTGGAGCTTTAACCTTATGCTGGAAAGTCTGAGACCCTTTATGTACCTCATAGGACCTCCATAACCTTACATAAATATTTGTTCGAAATGACGGACTGAGCTTTTTACAAGCTCACAGCCCAGGGCATTGCAGCCTTTACCAATGCCCTGGCTCTGCCCTGG
7mer-A1			right	Context_3	TCTACAGTCCGACGATCCTTCATTTGGTGGAGCTTTAACCTTATGCTGGAAAGTCTGAGACCCTTTATGAAAAGGCTAGGACCTCCATAACCTTACATAAATATTTGTTCGAAATGTACCTCAGAGCTTTTTACAAGCTCACAGCCCAGGGCATTGCAGCCTTTACCAATGCCCTGGCTCTGCCCTGG
7mer-A1			dual	Context_3	TCTACAGTCCGACGATCCTTCATTTGGTGGAGCTTTAACCTTATGCTGGAAAGTCTGAGACCCTTTATGTACCTCATAGGACCTCCATAACCTTACATAAATATTTGTTCGAAATGTACCTCAGAGCTTTTTACAAGCTCACAGCCCAGGGCATTGCAGCCTTTACCAATGCCCTGGCTCTGCCCTGG
6mer			left	Context_3	TCTACAGTCCGACGATCCTTCATTTGGTGGAGCTTTAACCTTATGCTGGAAAGTCTGAGACCCTTTATGTACCTCCTAGGACCTCCATAACCTTACATAAATATTTGTTCGAAATGACGGACTGAGCTTTTTACAAGCTCACAGCCCAGGGCATTGCAGCCTTTACCAATGCCCTGGCTCTGCCCTGG
6mer			right	Context_3	TCTACAGTCCGACGATCCTTCATTTGGTGGAGCTTTAACCTTATGCTGGAAAGTCTGAGACCCTTTATGAAAAGGCTAGGACCTCCATAACCTTACATAAATATTTGTTCGAAATGTACCTCTGAGCTTTTTACAAGCTCACAGCCCAGGGCATTGCAGCCTTTACCAATGCCCTGGCTCTGCCCTGG
6mer			dual	Context_3	TCTACAGTCCGACGATCCTTCATTTGGTGGAGCTTTAACCTTATGCTGGAAAGTCTGAGACCCTTTATGTACCTCCTAGGACCTCCATAACCTTACATAAATATTTGTTCGAAATGTACCTCTGAGCTTTTTACAAGCTCACAGCCCAGGGCATTGCAGCCTTTACCAATGCCCTGGCTCTGCCCTGG
8mer-w6			left	Context_3	TCTACAGTCCGACGATCCTTCATTTGGTGGAGCTTTAACCTTATGCTGGAAAGTCTGAGACCCTTTATCTGCCTCATAGGACCTCCATAACCTTACATAAATATTTGTTCGAAATGACGGACTGAGCTTTTTACAAGCTCACAGCCCAGGGCATTGCAGCCTTTACCAATGCCCTGGCTCTGCCCTGG
8mer-w6			right	Context_3	TCTACAGTCCGACGATCCTTCATTTGGTGGAGCTTTAACCTTATGCTGGAAAGTCTGAGACCCTTTATGAAAAGGCTAGGACCTCCATAACCTTACATAAATATTTGTTCGAAATCTGCCTCAGAGCTTTTTACAAGCTCACAGCCCAGGGCATTGCAGCCTTTACCAATGCCCTGGCTCTGCCCTGG
8mer-w6			dual	Context_3	TCTACAGTCCGACGATCCTTCATTTGGTGGAGCTTTAACCTTATGCTGGAAAGTCTGAGACCCTTTATCTGCCTCATAGGACCTCCATAACCTTACATAAATATTTGTTCGAAATCTGCCTCAGAGCTTTTTACAAGCTCACAGCCCAGGGCATTGCAGCCTTTACCAATGCCCTGGCTCTGCCCTGG
8mer-w6	4mer-m13.16		left	Context_3	TCTACAGTCCGACGATCCTTCATTTGGTGGAGCTTTAACCTTATGCTGGAAAGTCTGAGAACAATTATCTGCCTCATAGGACCTCCATAACCTTACATAAATATTTGTTCGAAATGACGGACTGAGCTTTTTACAAGCTCACAGCCCAGGGCATTGCAGCCTTTACCAATGCCCTGGCTCTGCCCTGG
8mer-w6	4mer-m13.16		right	Context_3	TCTACAGTCCGACGATCCTTCATTTGGTGGAGCTTTAACCTTATGCTGGAAAGTCTGAGACCCTTTATGAAAAGGCTAGGACCTCCATAACCTTACATAAATATTTGACAAAAATCTGCCTCAGAGCTTTTTACAAGCTCACAGCCCAGGGCATTGCAGCCTTTACCAATGCCCTGGCTCTGCCCTGG
8mer-w6	4mer-m13.16		dual	Context_3	TCTACAGTCCGACGATCCTTCATTTGGTGGAGCTTTAACCTTATGCTGGAAAGTCTGAGAACAATTATCTGCCTCATAGGACCTCCATAACCTTACATAAATATTTGACAAAAATCTGCCTCAGAGCTTTTTACAAGCTCACAGCCCAGGGCATTGCAGCCTTTACCAATGCCCTGGCTCTGCCCTGG
8mer-w6	4mer-m13.16	A	left	Context_3	TCTACAGTCCGACGATCCTTCATTTGGTGGAGCTTTAACCTTATGCTGGAAAGTCTGAGAACAATTAATCTGCCTCATAGGACCTCCATAACCTTACATAAATATTTGTTCGAAATGACGGACTGAGCTTTTTACAAGCTCACAGCCCAGGGCATTGCAGCCTTTACCAATGCCCTGGCTCTGCCCTG
8mer-w6	4mer-m13.16	A	right	Context_3	TCTACAGTCCGACGATCCTTCATTTGGTGGAGCTTTAACCTTATGCTGGAAAGTCTGAGACCCTTTATGAAAAGGCTAGGACCTCCATAACCTTACATAAATATTTGACAAAAAATCTGCCTCAGAGCTTTTTACAAGCTCACAGCCCAGGGCATTGCAGCCTTTACCAATGCCCTGGCTCTGCCCTG
8mer-w6	4mer-m13.16	A	dual	Context_3	TCTACAGTCCGACGATCCTTCATTTGGTGGAGCTTTAACCTTATGCTGGAAAGTCTGAGAACAATTAATCTGCCTCATAGGACCTCCATAACCTTACATAAATATTTGACAAAAAATCTGCCTCAGAGCTTTTTACAAGCTCACAGCCCAGGGCATTGCAGCCTTTACCAATGCCCTGGCTCTGCCCT
8mer-w6	4mer-m13.16	AAAA	left	Context_3	TCTACAGTCCGACGATCCTTCATTTGGTGGAGCTTTAACCTTATGCTGGAAAGTCTGAGAACAATTAAAAATCTGCCTCATAGGACCTCCATAACCTTACATAAATATTTGTTCGAAATGACGGACTGAGCTTTTTACAAGCTCACAGCCCAGGGCATTGCAGCCTTTACCAATGCCCTGGCTCTGCC
8mer-w6	4mer-m13.16	AAAA	right	Context_3	TCTACAGTCCGACGATCCTTCATTTGGTGGAGCTTTAACCTTATGCTGGAAAGTCTGAGACCCTTTATGAAAAGGCTAGGACCTCCATAACCTTACATAAATATTTGACAAAAAAAAATCTGCCTCAGAGCTTTTTACAAGCTCACAGCCCAGGGCATTGCAGCCTTTACCAATGCCCTGGCTCTGCC
8mer-w6	4mer-m13.16	AAAA	dual	Context_3	TCTACAGTCCGACGATCCTTCATTTGGTGGAGCTTTAACCTTATGCTGGAAAGTCTGAGAACAATTAAAAATCTGCCTCATAGGACCTCCATAACCTTACATAAATATTTGACAAAAAAAAATCTGCCTCAGAGCTTTTTACAAGCTCACAGCCCAGGGCATTGCAGCCTTTACCAATGCCCTGGCTC
8mer-w6	4mer-m13.16	T	left	Context_3	TCTACAGTCCGACGATCCTTCATTTGGTGGAGCTTTAACCTTATGCTGGAAAGTCTGAGAACAATTATTCTGCCTCATAGGACCTCCATAACCTTACATAAATATTTGTTCGAAATGACGGACTGAGCTTTTTACAAGCTCACAGCCCAGGGCATTGCAGCCTTTACCAATGCCCTGGCTCTGCCCTG
8mer-w6	4mer-m13.16	T	right	Context_3	TCTACAGTCCGACGATCCTTCATTTGGTGGAGCTTTAACCTTATGCTGGAAAGTCTGAGACCCTTTATGAAAAGGCTAGGACCTCCATAACCTTACATAAATATTTGACAAAAATTCTGCCTCAGAGCTTTTTACAAGCTCACAGCCCAGGGCATTGCAGCCTTTACCAATGCCCTGGCTCTGCCCTG
8mer-w6	4mer-m13.16	T	dual	Context_3	TCTACAGTCCGACGATCCTTCATTTGGTGGAGCTTTAACCTTATGCTGGAAAGTCTGAGAACAATTATTCTGCCTCATAGGACCTCCATAACCTTACATAAATATTTGACAAAAATTCTGCCTCAGAGCTTTTTACAAGCTCACAGCCCAGGGCATTGCAGCCTTTACCAATGCCCTGGCTCTGCCCT
8mer-w6	4mer-m13.16	TTTT	left	Context_3	TCTACAGTCCGACGATCCTTCATTTGGTGGAGCTTTAACCTTATGCTGGAAAGTCTGAGAACAATTATTTTTCTGCCTCATAGGACCTCCATAACCTTACATAAATATTTGTTCGAAATGACGGACTGAGCTTTTTACAAGCTCACAGCCCAGGGCATTGCAGCCTTTACCAATGCCCTGGCTCTGCC
8mer-w6	4mer-m13.16	TTTT	right	Context_3	TCTACAGTCCGACGATCCTTCATTTGGTGGAGCTTTAACCTTATGCTGGAAAGTCTGAGACCCTTTATGAAAAGGCTAGGACCTCCATAACCTTACATAAATATTTGACAAAAATTTTTCTGCCTCAGAGCTTTTTACAAGCTCACAGCCCAGGGCATTGCAGCCTTTACCAATGCCCTGGCTCTGCC
8mer-w6	4mer-m13.16	TTTT	dual	Context_3	TCTACAGTCCGACGATCCTTCATTTGGTGGAGCTTTAACCTTATGCTGGAAAGTCTGAGAACAATTATTTTTCTGCCTCATAGGACCTCCATAACCTTACATAAATATTTGACAAAAATTTTTCTGCCTCAGAGCTTTTTACAAGCTCACAGCCCAGGGCATTGCAGCCTTTACCAATGCCCTGGCTC
8mer-w6	9mer-m11.19		left	Context_3	TCTACAGTCCGACGATCCTTCATTTGGTGGAGCTTTAACCTTATGCTGGAAAGTCTGTATACAACCATCTGCCTCATAGGACCTCCATAACCTTACATAAATATTTGTTCGAAATGACGGACTGAGCTTTTTACAAGCTCACAGCCCAGGGCATTGCAGCCTTTACCAATGCCCTGGCTCTGCCCTGG
8mer-w6	9mer-m11.19		right	Context_3	TCTACAGTCCGACGATCCTTCATTTGGTGGAGCTTTAACCTTATGCTGGAAAGTCTGAGACCCTTTATGAAAAGGCTAGGACCTCCATAACCTTACATAAATATTATACAACCATCTGCCTCAGAGCTTTTTACAAGCTCACAGCCCAGGGCATTGCAGCCTTTACCAATGCCCTGGCTCTGCCCTGG
8mer-w6	9mer-m11.19		dual	Context_3	TCTACAGTCCGACGATCCTTCATTTGGTGGAGCTTTAACCTTATGCTGGAAAGTCTGTATACAACCATCTGCCTCATAGGACCTCCATAACCTTACATAAATATTATACAACCATCTGCCTCAGAGCTTTTTACAAGCTCACAGCCCAGGGCATTGCAGCCTTTACCAATGCCCTGGCTCTGCCCTGG
8mer-w6	9mer-m11.19	A	left	Context_3	TCTACAGTCCGACGATCCTTCATTTGGTGGAGCTTTAACCTTATGCTGGAAAGTCTGTATACAACCAATCTGCCTCATAGGACCTCCATAACCTTACATAAATATTTGTTCGAAATGACGGACTGAGCTTTTTACAAGCTCACAGCCCAGGGCATTGCAGCCTTTACCAATGCCCTGGCTCTGCCCTG
8mer-w6	9mer-m11.19	A	right	Context_3	TCTACAGTCCGACGATCCTTCATTTGGTGGAGCTTTAACCTTATGCTGGAAAGTCTGAGACCCTTTATGAAAAGGCTAGGACCTCCATAACCTTACATAAATATTATACAACCAATCTGCCTCAGAGCTTTTTACAAGCTCACAGCCCAGGGCATTGCAGCCTTTACCAATGCCCTGGCTCTGCCCTG
8mer-w6	9mer-m11.19	A	dual	Context_3	TCTACAGTCCGACGATCCTTCATTTGGTGGAGCTTTAACCTTATGCTGGAAAGTCTGTATACAACCAATCTGCCTCATAGGACCTCCATAACCTTACATAAATATTATACAACCAATCTGCCTCAGAGCTTTTTACAAGCTCACAGCCCAGGGCATTGCAGCCTTTACCAATGCCCTGGCTCTGCCCT
8mer-w6	9mer-m11.19	AAAA	left	Context_3	TCTACAGTCCGACGATCCTTCATTTGGTGGAGCTTTAACCTTATGCTGGAAAGTCTGTATACAACCAAAAATCTGCCTCATAGGACCTCCATAACCTTACATAAATATTTGTTCGAAATGACGGACTGAGCTTTTTACAAGCTCACAGCCCAGGGCATTGCAGCCTTTACCAATGCCCTGGCTCTGCC
8mer-w6	9mer-m11.19	AAAA	right	Context_3	TCTACAGTCCGACGATCCTTCATTTGGTGGAGCTTTAACCTTATGCTGGAAAGTCTGAGACCCTTTATGAAAAGGCTAGGACCTCCATAACCTTACATAAATATTATACAACCAAAAATCTGCCTCAGAGCTTTTTACAAGCTCACAGCCCAGGGCATTGCAGCCTTTACCAATGCCCTGGCTCTGCC
8mer-w6	9mer-m11.19	AAAA	dual	Context_3	TCTACAGTCCGACGATCCTTCATTTGGTGGAGCTTTAACCTTATGCTGGAAAGTCTGTATACAACCAAAAATCTGCCTCATAGGACCTCCATAACCTTACATAAATATTATACAACCAAAAATCTGCCTCAGAGCTTTTTACAAGCTCACAGCCCAGGGCATTGCAGCCTTTACCAATGCCCTGGCTC
8mer-w6	9mer-m11.19	T	left	Context_3	TCTACAGTCCGACGATCCTTCATTTGGTGGAGCTTTAACCTTATGCTGGAAAGTCTGTATACAACCATTCTGCCTCATAGGACCTCCATAACCTTACATAAATATTTGTTCGAAATGACGGACTGAGCTTTTTACAAGCTCACAGCCCAGGGCATTGCAGCCTTTACCAATGCCCTGGCTCTGCCCTG
8mer-w6	9mer-m11.19	T	right	Context_3	TCTACAGTCCGACGATCCTTCATTTGGTGGAGCTTTAACCTTATGCTGGAAAGTCTGAGACCCTTTATGAAAAGGCTAGGACCTCCATAACCTTACATAAATATTATACAACCATTCTGCCTCAGAGCTTTTTACAAGCTCACAGCCCAGGGCATTGCAGCCTTTACCAATGCCCTGGCTCTGCCCTG
8mer-w6	9mer-m11.19	T	dual	Context_3	TCTACAGTCCGACGATCCTTCATTTGGTGGAGCTTTAACCTTATGCTGGAAAGTCTGTATACAACCATTCTGCCTCATAGGACCTCCATAACCTTACATAAATATTATACAACCATTCTGCCTCAGAGCTTTTTACAAGCTCACAGCCCAGGGCATTGCAGCCTTTACCAATGCCCTGGCTCTGCCCT
8mer-w6	9mer-m11.19	TTTT	left	Context_3	TCTACAGTCCGACGATCCTTCATTTGGTGGAGCTTTAACCTTATGCTGGAAAGTCTGTATACAACCATTTTTCTGCCTCATAGGACCTCCATAACCTTACATAAATATTTGTTCGAAATGACGGACTGAGCTTTTTACAAGCTCACAGCCCAGGGCATTGCAGCCTTTACCAATGCCCTGGCTCTGCC
8mer-w6	9mer-m11.19	TTTT	right	Context_3	TCTACAGTCCGACGATCCTTCATTTGGTGGAGCTTTAACCTTATGCTGGAAAGTCTGAGACCCTTTATGAAAAGGCTAGGACCTCCATAACCTTACATAAATATTATACAACCATTTTTCTGCCTCAGAGCTTTTTACAAGCTCACAGCCCAGGGCATTGCAGCCTTTACCAATGCCCTGGCTCTGCC
8mer-w6	9mer-m11.19	TTTT	dual	Context_3	TCTACAGTCCGACGATCCTTCATTTGGTGGAGCTTTAACCTTATGCTGGAAAGTCTGTATACAACCATTTTTCTGCCTCATAGGACCTCCATAACCTTACATAAATATTATACAACCATTTTTCTGCCTCAGAGCTTTTTACAAGCTCACAGCCCAGGGCATTGCAGCCTTTACCAATGCCCTGGCTC
8mer-w6	9mer-m13.21		left	Context_3	TCTACAGTCCGACGATCCTTCATTTGGTGGAGCTTTAACCTTATGCTGGAAAGTCACTATACAATTATCTGCCTCATAGGACCTCCATAACCTTACATAAATATTTGTTCGAAATGACGGACTGAGCTTTTTACAAGCTCACAGCCCAGGGCATTGCAGCCTTTACCAATGCCCTGGCTCTGCCCTGG
8mer-w6	9mer-m13.21		right	Context_3	TCTACAGTCCGACGATCCTTCATTTGGTGGAGCTTTAACCTTATGCTGGAAAGTCTGAGACCCTTTATGAAAAGGCTAGGACCTCCATAACCTTACATAAATACTATACAAAAATCTGCCTCAGAGCTTTTTACAAGCTCACAGCCCAGGGCATTGCAGCCTTTACCAATGCCCTGGCTCTGCCCTGG
8mer-w6	9mer-m13.21		dual	Context_3	TCTACAGTCCGACGATCCTTCATTTGGTGGAGCTTTAACCTTATGCTGGAAAGTCACTATACAATTATCTGCCTCATAGGACCTCCATAACCTTACATAAATACTATACAAAAATCTGCCTCAGAGCTTTTTACAAGCTCACAGCCCAGGGCATTGCAGCCTTTACCAATGCCCTGGCTCTGCCCTGG
8mer-w6	9mer-m13.21	A	left	Context_3	TCTACAGTCCGACGATCCTTCATTTGGTGGAGCTTTAACCTTATGCTGGAAAGTCACTATACAATTAATCTGCCTCATAGGACCTCCATAACCTTACATAAATATTTGTTCGAAATGACGGACTGAGCTTTTTACAAGCTCACAGCCCAGGGCATTGCAGCCTTTACCAATGCCCTGGCTCTGCCCTG
8mer-w6	9mer-m13.21	A	right	Context_3	TCTACAGTCCGACGATCCTTCATTTGGTGGAGCTTTAACCTTATGCTGGAAAGTCTGAGACCCTTTATGAAAAGGCTAGGACCTCCATAACCTTACATAAATACTATACAAAAAATCTGCCTCAGAGCTTTTTACAAGCTCACAGCCCAGGGCATTGCAGCCTTTACCAATGCCCTGGCTCTGCCCTG
8mer-w6	9mer-m13.21	A	dual	Context_3	TCTACAGTCCGACGATCCTTCATTTGGTGGAGCTTTAACCTTATGCTGGAAAGTCACTATACAATTAATCTGCCTCATAGGACCTCCATAACCTTACATAAATACTATACAAAAAATCTGCCTCAGAGCTTTTTACAAGCTCACAGCCCAGGGCATTGCAGCCTTTACCAATGCCCTGGCTCTGCCCT
8mer-w6	9mer-m13.21	AAAA	left	Context_3	TCTACAGTCCGACGATCCTTCATTTGGTGGAGCTTTAACCTTATGCTGGAAAGTCACTATACAATTAAAAATCTGCCTCATAGGACCTCCATAACCTTACATAAATATTTGTTCGAAATGACGGACTGAGCTTTTTACAAGCTCACAGCCCAGGGCATTGCAGCCTTTACCAATGCCCTGGCTCTGCC
8mer-w6	9mer-m13.21	AAAA	right	Context_3	TCTACAGTCCGACGATCCTTCATTTGGTGGAGCTTTAACCTTATGCTGGAAAGTCTGAGACCCTTTATGAAAAGGCTAGGACCTCCATAACCTTACATAAATACTATACAAAAAAAAATCTGCCTCAGAGCTTTTTACAAGCTCACAGCCCAGGGCATTGCAGCCTTTACCAATGCCCTGGCTCTGCC
8mer-w6	9mer-m13.21	AAAA	dual	Context_3	TCTACAGTCCGACGATCCTTCATTTGGTGGAGCTTTAACCTTATGCTGGAAAGTCACTATACAATTAAAAATCTGCCTCATAGGACCTCCATAACCTTACATAAATACTATACAAAAAAAAATCTGCCTCAGAGCTTTTTACAAGCTCACAGCCCAGGGCATTGCAGCCTTTACCAATGCCCTGGCTC
8mer-w6	9mer-m13.21	T	left	Context_3	TCTACAGTCCGACGATCCTTCATTTGGTGGAGCTTTAACCTTATGCTGGAAAGTCACTATACAATTATTCTGCCTCATAGGACCTCCATAACCTTACATAAATATTTGTTCGAAATGACGGACTGAGCTTTTTACAAGCTCACAGCCCAGGGCATTGCAGCCTTTACCAATGCCCTGGCTCTGCCCTG
8mer-w6	9mer-m13.21	T	right	Context_3	TCTACAGTCCGACGATCCTTCATTTGGTGGAGCTTTAACCTTATGCTGGAAAGTCTGAGACCCTTTATGAAAAGGCTAGGACCTCCATAACCTTACATAAATACTATACAAAAATTCTGCCTCAGAGCTTTTTACAAGCTCACAGCCCAGGGCATTGCAGCCTTTACCAATGCCCTGGCTCTGCCCTG
8mer-w6	9mer-m13.21	T	dual	Context_3	TCTACAGTCCGACGATCCTTCATTTGGTGGAGCTTTAACCTTATGCTGGAAAGTCACTATACAATTATTCTGCCTCATAGGACCTCCATAACCTTACATAAATACTATACAAAAATTCTGCCTCAGAGCTTTTTACAAGCTCACAGCCCAGGGCATTGCAGCCTTTACCAATGCCCTGGCTCTGCCCT
8mer-w6	9mer-m13.21	TTTT	left	Context_3	TCTACAGTCCGACGATCCTTCATTTGGTGGAGCTTTAACCTTATGCTGGAAAGTCACTATACAATTATTTTTCTGCCTCATAGGACCTCCATAACCTTACATAAATATTTGTTCGAAATGACGGACTGAGCTTTTTACAAGCTCACAGCCCAGGGCATTGCAGCCTTTACCAATGCCCTGGCTCTGCC
8mer-w6	9mer-m13.21	TTTT	right	Context_3	TCTACAGTCCGACGATCCTTCATTTGGTGGAGCTTTAACCTTATGCTGGAAAGTCTGAGACCCTTTATGAAAAGGCTAGGACCTCCATAACCTTACATAAATACTATACAAAAATTTTTCTGCCTCAGAGCTTTTTACAAGCTCACAGCCCAGGGCATTGCAGCCTTTACCAATGCCCTGGCTCTGCC
8mer-w6	9mer-m13.21	TTTT	dual	Context_3	TCTACAGTCCGACGATCCTTCATTTGGTGGAGCTTTAACCTTATGCTGGAAAGTCACTATACAATTATTTTTCTGCCTCATAGGACCTCCATAACCTTACATAAATACTATACAAAAATTTTTCTGCCTCAGAGCTTTTTACAAGCTCACAGCCCAGGGCATTGCAGCCTTTACCAATGCCCTGGCTC
No_site_0				Context_3	TCTACAGTCCGACGATCCTTCATTTGGTGGAGCTTTAACCTTATGCTGGAAAGTCTGAGACCCTTTATGAAAAGGCTAGGACCTCCATAACCTTACATAAATATTTGTTCGAAATGACGGACTGAGCTTTTTACAAGCTCACAGCCCAGGGCATTGCAGCCTTTACCAATGCCCTGGCTCTGCCCTGG
No_site_1				Context_3	TCTACAGTCCGACGATCCTTCATTTGGTGGAGCTTTAACCTTATGCTGGAAAGTCTGGAAAGAAATATGGAACTCATAGGACCTCCATAACCTTACATAAATAGATCACCGTTTATCATCGAAGAGCTTTTTACAAGCTCACAGCCCAGGGCATTGCAGCCTTTACCAATGCCCTGGCTCTGCCCTGG
No_site_2				Context_3	TCTACAGTCCGACGATCCTTCATTTGGTGGAGCTTTAACCTTATGCTGGAAAGTCTGAGACCGGTATAAAAGAAGGTAGGACCTCCATAACCTTACATAAATATGGGCAGCACATCTGGAGGGGAGCTTTTTACAAGCTCACAGCCCAGGGCATTGCAGCCTTTACCAATGCCCTGGCTCTGCCCTGG
No_site_3				Context_3	TCTACAGTCCGACGATCCTTCATTTGGTGGAGCTTTAACCTTATGCTGGAAAGTCTTACTGCCCTTAAACAAAGGTTAGGACCTCCATAACCTTACATAAATAACAATTTAACTTGGTCCTTCGAGCTTTTTACAAGCTCACAGCCCAGGGCATTGCAGCCTTTACCAATGCCCTGGCTCTGCCCTGG
No_site_4				Context_3	TCTACAGTCCGACGATCCTTCATTTGGTGGAGCTTTAACCTTATGCTGGAAAGTCTGTATCCAAATTTACGCTCCATAGGACCTCCATAACCTTACATAAATACTGGGTTGCCTTTGGGGGTTGAGCTTTTTACAAGCTCACAGCCCAGGGCATTGCAGCCTTTACCAATGCCCTGGCTCTGCCCTGG
No_site_5				Context_3	TCTACAGTCCGACGATCCTTCATTTGGTGGAGCTTTAACCTTATGCTGGAAAGTCTGCAGTGTGATTTGCTCCTGATAGGACCTCCATAACCTTACATAAATATGTCAGTGCTGATTGGCGTGGAGCTTTTTACAAGCTCACAGCCCAGGGCATTGCAGCCTTTACCAATGCCCTGGCTCTGCCCTGG
No_site_6				Context_3	TCTACAGTCCGACGATCCTTCATTTGGTGGAGCTTTAACCTTATGCTGGAAAGTCTAGGCTGCAAATTGCTCTTATTAGGACCTCCATAACCTTACATAAATAGGAAGAGATAATGCCTTGTAGAGCTTTTTACAAGCTCACAGCCCAGGGCATTGCAGCCTTTACCAATGCCCTGGCTCTGCCCTGG
lin-41	9mer-m11.19	T	dual	Context_4	TCTACAGTCCGACGATCAGCACTAAAACTGCAATCCGAGCCTGGTTTGAACGATGAATATACAACCATTCTACACTCACAAGGATGTCATCCATGGAAACTTTCTTTATACAACCATTCTGCCTCGGTAACATGAGAATTAGAGAAGTAATTCTTTGCTGGCTGCATACCAATGCCCTGGCTCTGCCC
8mer			left	Context_4	TCTACAGTCCGACGATCAGCACTAAAACTGCAATCCGAGCCTGGTTTGAACGATGAAGACGAAATTATCTACCTCACAAGGATGTCATCCATGGAAACTTTCTTTTATTAATTATTCTGTAAGGTAACATGAGAATTAGAGAAGTAATTCTTTGCTGGCTGCATACCAATGCCCTGGCTCTGCCCTGG
8mer			right	Context_4	TCTACAGTCCGACGATCAGCACTAAAACTGCAATCCGAGCCTGGTTTGAACGATGAAGACGAAATTATGTGTTCTCCAAGGATGTCATCCATGGAAACTTTCTTTTATTAATTATCTACCTCAGTAACATGAGAATTAGAGAAGTAATTCTTTGCTGGCTGCATACCAATGCCCTGGCTCTGCCCTGG
8mer			dual	Context_4	TCTACAGTCCGACGATCAGCACTAAAACTGCAATCCGAGCCTGGTTTGAACGATGAAGACGAAATTATCTACCTCACAAGGATGTCATCCATGGAAACTTTCTTTTATTAATTATCTACCTCAGTAACATGAGAATTAGAGAAGTAATTCTTTGCTGGCTGCATACCAATGCCCTGGCTCTGCCCTGG
7mer-m8			left	Context_4	TCTACAGTCCGACGATCAGCACTAAAACTGCAATCCGAGCCTGGTTTGAACGATGAAGACGAAATTATCTACCTCCCAAGGATGTCATCCATGGAAACTTTCTTTTATTAATTATTCTGTAAGGTAACATGAGAATTAGAGAAGTAATTCTTTGCTGGCTGCATACCAATGCCCTGGCTCTGCCCTGG
7mer-m8			right	Context_4	TCTACAGTCCGACGATCAGCACTAAAACTGCAATCCGAGCCTGGTTTGAACGATGAAGACGAAATTATGTGTTCTCCAAGGATGTCATCCATGGAAACTTTCTTTTATTAATTATCTACCTCGGTAACATGAGAATTAGAGAAGTAATTCTTTGCTGGCTGCATACCAATGCCCTGGCTCTGCCCTGG
7mer-m8			dual	Context_4	TCTACAGTCCGACGATCAGCACTAAAACTGCAATCCGAGCCTGGTTTGAACGATGAAGACGAAATTATCTACCTCCCAAGGATGTCATCCATGGAAACTTTCTTTTATTAATTATCTACCTCGGTAACATGAGAATTAGAGAAGTAATTCTTTGCTGGCTGCATACCAATGCCCTGGCTCTGCCCTGG
7mer-A1			left	Context_4	TCTACAGTCCGACGATCAGCACTAAAACTGCAATCCGAGCCTGGTTTGAACGATGAAGACGAAATTATGTACCTCACAAGGATGTCATCCATGGAAACTTTCTTTTATTAATTATTCTGTAAGGTAACATGAGAATTAGAGAAGTAATTCTTTGCTGGCTGCATACCAATGCCCTGGCTCTGCCCTGG
7mer-A1			right	Context_4	TCTACAGTCCGACGATCAGCACTAAAACTGCAATCCGAGCCTGGTTTGAACGATGAAGACGAAATTATGTGTTCTCCAAGGATGTCATCCATGGAAACTTTCTTTTATTAATTATTTACCTCAGTAACATGAGAATTAGAGAAGTAATTCTTTGCTGGCTGCATACCAATGCCCTGGCTCTGCCCTGG
7mer-A1			dual	Context_4	TCTACAGTCCGACGATCAGCACTAAAACTGCAATCCGAGCCTGGTTTGAACGATGAAGACGAAATTATGTACCTCACAAGGATGTCATCCATGGAAACTTTCTTTTATTAATTATTTACCTCAGTAACATGAGAATTAGAGAAGTAATTCTTTGCTGGCTGCATACCAATGCCCTGGCTCTGCCCTGG
6mer			left	Context_4	TCTACAGTCCGACGATCAGCACTAAAACTGCAATCCGAGCCTGGTTTGAACGATGAAGACGAAATTATGTACCTCCCAAGGATGTCATCCATGGAAACTTTCTTTTATTAATTATTCTGTAAGGTAACATGAGAATTAGAGAAGTAATTCTTTGCTGGCTGCATACCAATGCCCTGGCTCTGCCCTGG
6mer			right	Context_4	TCTACAGTCCGACGATCAGCACTAAAACTGCAATCCGAGCCTGGTTTGAACGATGAAGACGAAATTATGTGTTCTCCAAGGATGTCATCCATGGAAACTTTCTTTTATTAATTATTTACCTCGGTAACATGAGAATTAGAGAAGTAATTCTTTGCTGGCTGCATACCAATGCCCTGGCTCTGCCCTGG
6mer			dual	Context_4	TCTACAGTCCGACGATCAGCACTAAAACTGCAATCCGAGCCTGGTTTGAACGATGAAGACGAAATTATGTACCTCCCAAGGATGTCATCCATGGAAACTTTCTTTTATTAATTATTTACCTCGGTAACATGAGAATTAGAGAAGTAATTCTTTGCTGGCTGCATACCAATGCCCTGGCTCTGCCCTGG
8mer-w6			left	Context_4	TCTACAGTCCGACGATCAGCACTAAAACTGCAATCCGAGCCTGGTTTGAACGATGAAGACGAAATTATCTGCCTCACAAGGATGTCATCCATGGAAACTTTCTTTTATTAATTATTCTGTAAGGTAACATGAGAATTAGAGAAGTAATTCTTTGCTGGCTGCATACCAATGCCCTGGCTCTGCCCTGG
8mer-w6			right	Context_4	TCTACAGTCCGACGATCAGCACTAAAACTGCAATCCGAGCCTGGTTTGAACGATGAAGACGAAATTATGTGTTCTCCAAGGATGTCATCCATGGAAACTTTCTTTTATTAATTATCTGCCTCAGTAACATGAGAATTAGAGAAGTAATTCTTTGCTGGCTGCATACCAATGCCCTGGCTCTGCCCTGG
8mer-w6			dual	Context_4	TCTACAGTCCGACGATCAGCACTAAAACTGCAATCCGAGCCTGGTTTGAACGATGAAGACGAAATTATCTGCCTCACAAGGATGTCATCCATGGAAACTTTCTTTTATTAATTATCTGCCTCAGTAACATGAGAATTAGAGAAGTAATTCTTTGCTGGCTGCATACCAATGCCCTGGCTCTGCCCTGG
8mer-w6	4mer-m13.16		left	Context_4	TCTACAGTCCGACGATCAGCACTAAAACTGCAATCCGAGCCTGGTTTGAACGATGAAGACACAATTATCTGCCTCACAAGGATGTCATCCATGGAAACTTTCTTTTATTAATTATTCTGTAAGGTAACATGAGAATTAGAGAAGTAATTCTTTGCTGGCTGCATACCAATGCCCTGGCTCTGCCCTGG
8mer-w6	4mer-m13.16		right	Context_4	TCTACAGTCCGACGATCAGCACTAAAACTGCAATCCGAGCCTGGTTTGAACGATGAAGACGAAATTATGTGTTCTCCAAGGATGTCATCCATGGAAACTTTCTTTTAACAATTATCTGCCTCAGTAACATGAGAATTAGAGAAGTAATTCTTTGCTGGCTGCATACCAATGCCCTGGCTCTGCCCTGG
8mer-w6	4mer-m13.16		dual	Context_4	TCTACAGTCCGACGATCAGCACTAAAACTGCAATCCGAGCCTGGTTTGAACGATGAAGACACAATTATCTGCCTCACAAGGATGTCATCCATGGAAACTTTCTTTTAACAATTATCTGCCTCAGTAACATGAGAATTAGAGAAGTAATTCTTTGCTGGCTGCATACCAATGCCCTGGCTCTGCCCTGG
8mer-w6	4mer-m13.16	A	left	Context_4	TCTACAGTCCGACGATCAGCACTAAAACTGCAATCCGAGCCTGGTTTGAACGATGAAGACACAATTAATCTGCCTCACAAGGATGTCATCCATGGAAACTTTCTTTTATTAATTATTCTGTAAGGTAACATGAGAATTAGAGAAGTAATTCTTTGCTGGCTGCATACCAATGCCCTGGCTCTGCCCTG
8mer-w6	4mer-m13.16	A	right	Context_4	TCTACAGTCCGACGATCAGCACTAAAACTGCAATCCGAGCCTGGTTTGAACGATGAAGACGAAATTATGTGTTCTCCAAGGATGTCATCCATGGAAACTTTCTTTTAACAATTAATCTGCCTCAGTAACATGAGAATTAGAGAAGTAATTCTTTGCTGGCTGCATACCAATGCCCTGGCTCTGCCCTG
8mer-w6	4mer-m13.16	A	dual	Context_4	TCTACAGTCCGACGATCAGCACTAAAACTGCAATCCGAGCCTGGTTTGAACGATGAAGACACAATTAATCTGCCTCACAAGGATGTCATCCATGGAAACTTTCTTTTAACAATTAATCTGCCTCAGTAACATGAGAATTAGAGAAGTAATTCTTTGCTGGCTGCATACCAATGCCCTGGCTCTGCCCT
8mer-w6	4mer-m13.16	AAAA	left	Context_4	TCTACAGTCCGACGATCAGCACTAAAACTGCAATCCGAGCCTGGTTTGAACGATGAAGACACAATTAAAAATCTGCCTCACAAGGATGTCATCCATGGAAACTTTCTTTTATTAATTATTCTGTAAGGTAACATGAGAATTAGAGAAGTAATTCTTTGCTGGCTGCATACCAATGCCCTGGCTCTGCC
8mer-w6	4mer-m13.16	AAAA	right	Context_4	TCTACAGTCCGACGATCAGCACTAAAACTGCAATCCGAGCCTGGTTTGAACGATGAAGACGAAATTATGTGTTCTCCAAGGATGTCATCCATGGAAACTTTCTTTTAACAATTAAAAATCTGCCTCAGTAACATGAGAATTAGAGAAGTAATTCTTTGCTGGCTGCATACCAATGCCCTGGCTCTGCC
8mer-w6	4mer-m13.16	AAAA	dual	Context_4	TCTACAGTCCGACGATCAGCACTAAAACTGCAATCCGAGCCTGGTTTGAACGATGAAGACACAATTAAAAATCTGCCTCACAAGGATGTCATCCATGGAAACTTTCTTTTAACAATTAAAAATCTGCCTCAGTAACATGAGAATTAGAGAAGTAATTCTTTGCTGGCTGCATACCAATGCCCTGGCTC
8mer-w6	4mer-m13.16	T	left	Context_4	TCTACAGTCCGACGATCAGCACTAAAACTGCAATCCGAGCCTGGTTTGAACGATGAAGACACAATTATTCTGCCTCACAAGGATGTCATCCATGGAAACTTTCTTTTATTAATTATTCTGTAAGGTAACATGAGAATTAGAGAAGTAATTCTTTGCTGGCTGCATACCAATGCCCTGGCTCTGCCCTG
8mer-w6	4mer-m13.16	T	right	Context_4	TCTACAGTCCGACGATCAGCACTAAAACTGCAATCCGAGCCTGGTTTGAACGATGAAGACGAAATTATGTGTTCTCCAAGGATGTCATCCATGGAAACTTTCTTTTAACAATTATTCTGCCTCAGTAACATGAGAATTAGAGAAGTAATTCTTTGCTGGCTGCATACCAATGCCCTGGCTCTGCCCTG
8mer-w6	4mer-m13.16	T	dual	Context_4	TCTACAGTCCGACGATCAGCACTAAAACTGCAATCCGAGCCTGGTTTGAACGATGAAGACACAATTATTCTGCCTCACAAGGATGTCATCCATGGAAACTTTCTTTTAACAATTATTCTGCCTCAGTAACATGAGAATTAGAGAAGTAATTCTTTGCTGGCTGCATACCAATGCCCTGGCTCTGCCCT
8mer-w6	4mer-m13.16	TTTT	left	Context_4	TCTACAGTCCGACGATCAGCACTAAAACTGCAATCCGAGCCTGGTTTGAACGATGAAGACACAATTATTTTTCTGCCTCACAAGGATGTCATCCATGGAAACTTTCTTTTATTAATTATTCTGTAAGGTAACATGAGAATTAGAGAAGTAATTCTTTGCTGGCTGCATACCAATGCCCTGGCTCTGCC
8mer-w6	4mer-m13.16	TTTT	right	Context_4	TCTACAGTCCGACGATCAGCACTAAAACTGCAATCCGAGCCTGGTTTGAACGATGAAGACGAAATTATGTGTTCTCCAAGGATGTCATCCATGGAAACTTTCTTTTAACAATTATTTTTCTGCCTCAGTAACATGAGAATTAGAGAAGTAATTCTTTGCTGGCTGCATACCAATGCCCTGGCTCTGCC
8mer-w6	4mer-m13.16	TTTT	dual	Context_4	TCTACAGTCCGACGATCAGCACTAAAACTGCAATCCGAGCCTGGTTTGAACGATGAAGACACAATTATTTTTCTGCCTCACAAGGATGTCATCCATGGAAACTTTCTTTTAACAATTATTTTTCTGCCTCAGTAACATGAGAATTAGAGAAGTAATTCTTTGCTGGCTGCATACCAATGCCCTGGCTC
8mer-w6	9mer-m11.19		left	Context_4	TCTACAGTCCGACGATCAGCACTAAAACTGCAATCCGAGCCTGGTTTGAACGATGAATATACAACCATCTGCCTCACAAGGATGTCATCCATGGAAACTTTCTTTTATTAATTATTCTGTAAGGTAACATGAGAATTAGAGAAGTAATTCTTTGCTGGCTGCATACCAATGCCCTGGCTCTGCCCTGG
8mer-w6	9mer-m11.19		right	Context_4	TCTACAGTCCGACGATCAGCACTAAAACTGCAATCCGAGCCTGGTTTGAACGATGAAGACGAAATTATGTGTTCTCCAAGGATGTCATCCATGGAAACTTTCTTTATACAACCATCTGCCTCAGTAACATGAGAATTAGAGAAGTAATTCTTTGCTGGCTGCATACCAATGCCCTGGCTCTGCCCTGG
8mer-w6	9mer-m11.19		dual	Context_4	TCTACAGTCCGACGATCAGCACTAAAACTGCAATCCGAGCCTGGTTTGAACGATGAATATACAACCATCTGCCTCACAAGGATGTCATCCATGGAAACTTTCTTTATACAACCATCTGCCTCAGTAACATGAGAATTAGAGAAGTAATTCTTTGCTGGCTGCATACCAATGCCCTGGCTCTGCCCTGG
8mer-w6	9mer-m11.19	A	left	Context_4	TCTACAGTCCGACGATCAGCACTAAAACTGCAATCCGAGCCTGGTTTGAACGATGAATATACAACCAATCTGCCTCACAAGGATGTCATCCATGGAAACTTTCTTTTATTAATTATTCTGTAAGGTAACATGAGAATTAGAGAAGTAATTCTTTGCTGGCTGCATACCAATGCCCTGGCTCTGCCCTG
8mer-w6	9mer-m11.19	A	right	Context_4	TCTACAGTCCGACGATCAGCACTAAAACTGCAATCCGAGCCTGGTTTGAACGATGAAGACGAAATTATGTGTTCTCCAAGGATGTCATCCATGGAAACTTTCTTTATACAACCAATCTGCCTCAGTAACATGAGAATTAGAGAAGTAATTCTTTGCTGGCTGCATACCAATGCCCTGGCTCTGCCCTG
8mer-w6	9mer-m11.19	A	dual	Context_4	TCTACAGTCCGACGATCAGCACTAAAACTGCAATCCGAGCCTGGTTTGAACGATGAATATACAACCAATCTGCCTCACAAGGATGTCATCCATGGAAACTTTCTTTATACAACCAATCTGCCTCAGTAACATGAGAATTAGAGAAGTAATTCTTTGCTGGCTGCATACCAATGCCCTGGCTCTGCCCT
8mer-w6	9mer-m11.19	AAAA	left	Context_4	TCTACAGTCCGACGATCAGCACTAAAACTGCAATCCGAGCCTGGTTTGAACGATGAATATACAACCAAAAATCTGCCTCACAAGGATGTCATCCATGGAAACTTTCTTTTATTAATTATTCTGTAAGGTAACATGAGAATTAGAGAAGTAATTCTTTGCTGGCTGCATACCAATGCCCTGGCTCTGCC
8mer-w6	9mer-m11.19	AAAA	right	Context_4	TCTACAGTCCGACGATCAGCACTAAAACTGCAATCCGAGCCTGGTTTGAACGATGAAGACGAAATTATGTGTTCTCCAAGGATGTCATCCATGGAAACTTTCTTTATACAACCAAAAATCTGCCTCAGTAACATGAGAATTAGAGAAGTAATTCTTTGCTGGCTGCATACCAATGCCCTGGCTCTGCC
8mer-w6	9mer-m11.19	AAAA	dual	Context_4	TCTACAGTCCGACGATCAGCACTAAAACTGCAATCCGAGCCTGGTTTGAACGATGAATATACAACCAAAAATCTGCCTCACAAGGATGTCATCCATGGAAACTTTCTTTATACAACCAAAAATCTGCCTCAGTAACATGAGAATTAGAGAAGTAATTCTTTGCTGGCTGCATACCAATGCCCTGGCTC
8mer-w6	9mer-m11.19	T	left	Context_4	TCTACAGTCCGACGATCAGCACTAAAACTGCAATCCGAGCCTGGTTTGAACGATGAATATACAACCATTCTGCCTCACAAGGATGTCATCCATGGAAACTTTCTTTTATTAATTATTCTGTAAGGTAACATGAGAATTAGAGAAGTAATTCTTTGCTGGCTGCATACCAATGCCCTGGCTCTGCCCTG
8mer-w6	9mer-m11.19	T	right	Context_4	TCTACAGTCCGACGATCAGCACTAAAACTGCAATCCGAGCCTGGTTTGAACGATGAAGACGAAATTATGTGTTCTCCAAGGATGTCATCCATGGAAACTTTCTTTATACAACCATTCTGCCTCAGTAACATGAGAATTAGAGAAGTAATTCTTTGCTGGCTGCATACCAATGCCCTGGCTCTGCCCTG
8mer-w6	9mer-m11.19	T	dual	Context_4	TCTACAGTCCGACGATCAGCACTAAAACTGCAATCCGAGCCTGGTTTGAACGATGAATATACAACCATTCTGCCTCACAAGGATGTCATCCATGGAAACTTTCTTTATACAACCATTCTGCCTCAGTAACATGAGAATTAGAGAAGTAATTCTTTGCTGGCTGCATACCAATGCCCTGGCTCTGCCCT
8mer-w6	9mer-m11.19	TTTT	left	Context_4	TCTACAGTCCGACGATCAGCACTAAAACTGCAATCCGAGCCTGGTTTGAACGATGAATATACAACCATTTTTCTGCCTCACAAGGATGTCATCCATGGAAACTTTCTTTTATTAATTATTCTGTAAGGTAACATGAGAATTAGAGAAGTAATTCTTTGCTGGCTGCATACCAATGCCCTGGCTCTGCC
8mer-w6	9mer-m11.19	TTTT	right	Context_4	TCTACAGTCCGACGATCAGCACTAAAACTGCAATCCGAGCCTGGTTTGAACGATGAAGACGAAATTATGTGTTCTCCAAGGATGTCATCCATGGAAACTTTCTTTATACAACCATTTTTCTGCCTCAGTAACATGAGAATTAGAGAAGTAATTCTTTGCTGGCTGCATACCAATGCCCTGGCTCTGCC
8mer-w6	9mer-m11.19	TTTT	dual	Context_4	TCTACAGTCCGACGATCAGCACTAAAACTGCAATCCGAGCCTGGTTTGAACGATGAATATACAACCATTTTTCTGCCTCACAAGGATGTCATCCATGGAAACTTTCTTTATACAACCATTTTTCTGCCTCAGTAACATGAGAATTAGAGAAGTAATTCTTTGCTGGCTGCATACCAATGCCCTGGCTC
8mer-w6	9mer-m13.21		left	Context_4	TCTACAGTCCGACGATCAGCACTAAAACTGCAATCCGAGCCTGGTTTGAACGATGACTATACAATTATCTGCCTCACAAGGATGTCATCCATGGAAACTTTCTTTTATTAATTATTCTGTAAGGTAACATGAGAATTAGAGAAGTAATTCTTTGCTGGCTGCATACCAATGCCCTGGCTCTGCCCTGG
8mer-w6	9mer-m13.21		right	Context_4	TCTACAGTCCGACGATCAGCACTAAAACTGCAATCCGAGCCTGGTTTGAACGATGAAGACGAAATTATGTGTTCTCCAAGGATGTCATCCATGGAAACTTTCACTATACAATTATCTGCCTCAGTAACATGAGAATTAGAGAAGTAATTCTTTGCTGGCTGCATACCAATGCCCTGGCTCTGCCCTGG
8mer-w6	9mer-m13.21		dual	Context_4	TCTACAGTCCGACGATCAGCACTAAAACTGCAATCCGAGCCTGGTTTGAACGATGACTATACAATTATCTGCCTCACAAGGATGTCATCCATGGAAACTTTCACTATACAATTATCTGCCTCAGTAACATGAGAATTAGAGAAGTAATTCTTTGCTGGCTGCATACCAATGCCCTGGCTCTGCCCTGG
8mer-w6	9mer-m13.21	A	left	Context_4	TCTACAGTCCGACGATCAGCACTAAAACTGCAATCCGAGCCTGGTTTGAACGATGACTATACAATTAATCTGCCTCACAAGGATGTCATCCATGGAAACTTTCTTTTATTAATTATTCTGTAAGGTAACATGAGAATTAGAGAAGTAATTCTTTGCTGGCTGCATACCAATGCCCTGGCTCTGCCCTG
8mer-w6	9mer-m13.21	A	right	Context_4	TCTACAGTCCGACGATCAGCACTAAAACTGCAATCCGAGCCTGGTTTGAACGATGAAGACGAAATTATGTGTTCTCCAAGGATGTCATCCATGGAAACTTTCACTATACAATTAATCTGCCTCAGTAACATGAGAATTAGAGAAGTAATTCTTTGCTGGCTGCATACCAATGCCCTGGCTCTGCCCTG
8mer-w6	9mer-m13.21	A	dual	Context_4	TCTACAGTCCGACGATCAGCACTAAAACTGCAATCCGAGCCTGGTTTGAACGATGACTATACAATTAATCTGCCTCACAAGGATGTCATCCATGGAAACTTTCACTATACAATTAATCTGCCTCAGTAACATGAGAATTAGAGAAGTAATTCTTTGCTGGCTGCATACCAATGCCCTGGCTCTGCCCT
8mer-w6	9mer-m13.21	AAAA	left	Context_4	TCTACAGTCCGACGATCAGCACTAAAACTGCAATCCGAGCCTGGTTTGAACGATGACTATACAATTAAAAATCTGCCTCACAAGGATGTCATCCATGGAAACTTTCTTTTATTAATTATTCTGTAAGGTAACATGAGAATTAGAGAAGTAATTCTTTGCTGGCTGCATACCAATGCCCTGGCTCTGCC
8mer-w6	9mer-m13.21	AAAA	right	Context_4	TCTACAGTCCGACGATCAGCACTAAAACTGCAATCCGAGCCTGGTTTGAACGATGAAGACGAAATTATGTGTTCTCCAAGGATGTCATCCATGGAAACTTTCACTATACAATTAAAAATCTGCCTCAGTAACATGAGAATTAGAGAAGTAATTCTTTGCTGGCTGCATACCAATGCCCTGGCTCTGCC
8mer-w6	9mer-m13.21	AAAA	dual	Context_4	TCTACAGTCCGACGATCAGCACTAAAACTGCAATCCGAGCCTGGTTTGAACGATGACTATACAATTAAAAATCTGCCTCACAAGGATGTCATCCATGGAAACTTTCACTATACAATTAAAAATCTGCCTCAGTAACATGAGAATTAGAGAAGTAATTCTTTGCTGGCTGCATACCAATGCCCTGGCTC
8mer-w6	9mer-m13.21	T	left	Context_4	TCTACAGTCCGACGATCAGCACTAAAACTGCAATCCGAGCCTGGTTTGAACGATGACTATACAATTATTCTGCCTCACAAGGATGTCATCCATGGAAACTTTCTTTTATTAATTATTCTGTAAGGTAACATGAGAATTAGAGAAGTAATTCTTTGCTGGCTGCATACCAATGCCCTGGCTCTGCCCTG
8mer-w6	9mer-m13.21	T	right	Context_4	TCTACAGTCCGACGATCAGCACTAAAACTGCAATCCGAGCCTGGTTTGAACGATGAAGACGAAATTATGTGTTCTCCAAGGATGTCATCCATGGAAACTTTCACTATACAATTATTCTGCCTCAGTAACATGAGAATTAGAGAAGTAATTCTTTGCTGGCTGCATACCAATGCCCTGGCTCTGCCCTG
8mer-w6	9mer-m13.21	T	dual	Context_4	TCTACAGTCCGACGATCAGCACTAAAACTGCAATCCGAGCCTGGTTTGAACGATGACTATACAATTATTCTGCCTCACAAGGATGTCATCCATGGAAACTTTCACTATACAATTATTCTGCCTCAGTAACATGAGAATTAGAGAAGTAATTCTTTGCTGGCTGCATACCAATGCCCTGGCTCTGCCCT
8mer-w6	9mer-m13.21	TTTT	left	Context_4	TCTACAGTCCGACGATCAGCACTAAAACTGCAATCCGAGCCTGGTTTGAACGATGACTATACAATTATTTTTCTGCCTCACAAGGATGTCATCCATGGAAACTTTCTTTTATTAATTATTCTGTAAGGTAACATGAGAATTAGAGAAGTAATTCTTTGCTGGCTGCATACCAATGCCCTGGCTCTGCC
8mer-w6	9mer-m13.21	TTTT	right	Context_4	TCTACAGTCCGACGATCAGCACTAAAACTGCAATCCGAGCCTGGTTTGAACGATGAAGACGAAATTATGTGTTCTCCAAGGATGTCATCCATGGAAACTTTCACTATACAATTATTTTTCTGCCTCAGTAACATGAGAATTAGAGAAGTAATTCTTTGCTGGCTGCATACCAATGCCCTGGCTCTGCC
8mer-w6	9mer-m13.21	TTTT	dual	Context_4	TCTACAGTCCGACGATCAGCACTAAAACTGCAATCCGAGCCTGGTTTGAACGATGACTATACAATTATTTTTCTGCCTCACAAGGATGTCATCCATGGAAACTTTCACTATACAATTATTTTTCTGCCTCAGTAACATGAGAATTAGAGAAGTAATTCTTTGCTGGCTGCATACCAATGCCCTGGCTC
No_site_0				Context_4	TCTACAGTCCGACGATCAGCACTAAAACTGCAATCCGAGCCTGGTTTGAACGATGAAGACGAAATTATGTGTTCTCCAAGGATGTCATCCATGGAAACTTTCTTTTATTAATTATTCTGTAAGGTAACATGAGAATTAGAGAAGTAATTCTTTGCTGGCTGCATACCAATGCCCTGGCTCTGCCCTGG
No_site_1				Context_4	TCTACAGTCCGACGATCAGCACTAAAACTGCAATCCGAGCCTGGTTTGAACGATGACAGTGATCATTATGATCCAGCAAGGATGTCATCCATGGAAACTTTCTTCTTGATTCTTGCTAACTGGGTAACATGAGAATTAGAGAAGTAATTCTTTGCTGGCTGCATACCAATGCCCTGGCTCTGCCCTGG
No_site_2				Context_4	TCTACAGTCCGACGATCAGCACTAAAACTGCAATCCGAGCCTGGTTTGAACGATGAATGGAGATTTTTTTTGCCAACAAGGATGTCATCCATGGAAACTTTCTGGCCCCTGCTTGTAAAAAAGGTAACATGAGAATTAGAGAAGTAATTCTTTGCTGGCTGCATACCAATGCCCTGGCTCTGCCCTGG
No_site_3				Context_4	TCTACAGTCCGACGATCAGCACTAAAACTGCAATCCGAGCCTGGTTTGAACGATGACTTTTATGATTTCCAGCTCTCAAGGATGTCATCCATGGAAACTTTCTACATGCCTTGAGGCTTGCCTGTAACATGAGAATTAGAGAAGTAATTCTTTGCTGGCTGCATACCAATGCCCTGGCTCTGCCCTGG
No_site_4				Context_4	TCTACAGTCCGACGATCAGCACTAAAACTGCAATCCGAGCCTGGTTTGAACGATGATAGTGTTAATAATCAGCAAACAAGGATGTCATCCATGGAAACTTTCTATCCCTTATAGGGTTAAGCTGTAACATGAGAATTAGAGAAGTAATTCTTTGCTGGCTGCATACCAATGCCCTGGCTCTGCCCTGG
No_site_5				Context_4	TCTACAGTCCGACGATCAGCACTAAAACTGCAATCCGAGCCTGGTTTGAACGATGAAGTTGATAAAAATTATACCACAAGGATGTCATCCATGGAAACTTTCTTGTGTAGGGTCTAGATTAGGGTAACATGAGAATTAGAGAAGTAATTCTTTGCTGGCTGCATACCAATGCCCTGGCTCTGCCCTGG
No_site_6				Context_4	TCTACAGTCCGACGATCAGCACTAAAACTGCAATCCGAGCCTGGTTTGAACGATGAGAGTGCTAATTTCGCCTCATCAAGGATGTCATCCATGGAAACTTTCTGTGAAGGAGGGAACGCAGACGTAACATGAGAATTAGAGAAGTAATTCTTTGCTGGCTGCATACCAATGCCCTGGCTCTGCCCTGG
lin-41	9mer-m11.19	T	dual	Context_5	TCTACAGTCCGACGATCTCTGATATGCTAGACAAGGCTTGTTACTTTAGCGCTTTAATATACAACCATTCTACACTCATAACTCCCAAAAGTCCTCAGGAGGTCATTATACAACCATTCTGCCTCTTCTGATTCTATTGCTGAGATCTATCTTCGCTGCTCCCTTTTACCAATGCCCTGGCTCTGCCC
8mer			left	Context_5	TCTACAGTCCGACGATCTCTGATATGCTAGACAAGGCTTGTTACTTTAGCGCTTTAATTAGGGCTTATCTACCTCATAACTCCCAAAAGTCCTCAGGAGGTCATGGGGGGCAAATTTCCTGTTTCTGATTCTATTGCTGAGATCTATCTTCGCTGCTCCCTTTTACCAATGCCCTGGCTCTGCCCTGG
8mer			right	Context_5	TCTACAGTCCGACGATCTCTGATATGCTAGACAAGGCTTGTTACTTTAGCGCTTTAATTAGGGCTTATTCTTTCTCTAACTCCCAAAAGTCCTCAGGAGGTCATGGGGGGCAAATCTACCTCATCTGATTCTATTGCTGAGATCTATCTTCGCTGCTCCCTTTTACCAATGCCCTGGCTCTGCCCTGG
8mer			dual	Context_5	TCTACAGTCCGACGATCTCTGATATGCTAGACAAGGCTTGTTACTTTAGCGCTTTAATTAGGGCTTATCTACCTCATAACTCCCAAAAGTCCTCAGGAGGTCATGGGGGGCAAATCTACCTCATCTGATTCTATTGCTGAGATCTATCTTCGCTGCTCCCTTTTACCAATGCCCTGGCTCTGCCCTGG
7mer-m8			left	Context_5	TCTACAGTCCGACGATCTCTGATATGCTAGACAAGGCTTGTTACTTTAGCGCTTTAATTAGGGCTTATCTACCTCCTAACTCCCAAAAGTCCTCAGGAGGTCATGGGGGGCAAATTTCCTGTTTCTGATTCTATTGCTGAGATCTATCTTCGCTGCTCCCTTTTACCAATGCCCTGGCTCTGCCCTGG
7mer-m8			right	Context_5	TCTACAGTCCGACGATCTCTGATATGCTAGACAAGGCTTGTTACTTTAGCGCTTTAATTAGGGCTTATTCTTTCTCTAACTCCCAAAAGTCCTCAGGAGGTCATGGGGGGCAAATCTACCTCTTCTGATTCTATTGCTGAGATCTATCTTCGCTGCTCCCTTTTACCAATGCCCTGGCTCTGCCCTGG
7mer-m8			dual	Context_5	TCTACAGTCCGACGATCTCTGATATGCTAGACAAGGCTTGTTACTTTAGCGCTTTAATTAGGGCTTATCTACCTCCTAACTCCCAAAAGTCCTCAGGAGGTCATGGGGGGCAAATCTACCTCTTCTGATTCTATTGCTGAGATCTATCTTCGCTGCTCCCTTTTACCAATGCCCTGGCTCTGCCCTGG
7mer-A1			left	Context_5	TCTACAGTCCGACGATCTCTGATATGCTAGACAAGGCTTGTTACTTTAGCGCTTTAATTAGGGCTTATTTACCTCATAACTCCCAAAAGTCCTCAGGAGGTCATGGGGGGCAAATTTCCTGTTTCTGATTCTATTGCTGAGATCTATCTTCGCTGCTCCCTTTTACCAATGCCCTGGCTCTGCCCTGG
7mer-A1			right	Context_5	TCTACAGTCCGACGATCTCTGATATGCTAGACAAGGCTTGTTACTTTAGCGCTTTAATTAGGGCTTATTCTTTCTCTAACTCCCAAAAGTCCTCAGGAGGTCATGGGGGGCAAATTTACCTCATCTGATTCTATTGCTGAGATCTATCTTCGCTGCTCCCTTTTACCAATGCCCTGGCTCTGCCCTGG
7mer-A1			dual	Context_5	TCTACAGTCCGACGATCTCTGATATGCTAGACAAGGCTTGTTACTTTAGCGCTTTAATTAGGGCTTATTTACCTCATAACTCCCAAAAGTCCTCAGGAGGTCATGGGGGGCAAATTTACCTCATCTGATTCTATTGCTGAGATCTATCTTCGCTGCTCCCTTTTACCAATGCCCTGGCTCTGCCCTGG
6mer			left	Context_5	TCTACAGTCCGACGATCTCTGATATGCTAGACAAGGCTTGTTACTTTAGCGCTTTAATTAGGGCTTATTTACCTCCTAACTCCCAAAAGTCCTCAGGAGGTCATGGGGGGCAAATTTCCTGTTTCTGATTCTATTGCTGAGATCTATCTTCGCTGCTCCCTTTTACCAATGCCCTGGCTCTGCCCTGG
6mer			right	Context_5	TCTACAGTCCGACGATCTCTGATATGCTAGACAAGGCTTGTTACTTTAGCGCTTTAATTAGGGCTTATTCTTTCTCTAACTCCCAAAAGTCCTCAGGAGGTCATGGGGGGCAAATTTACCTCTTCTGATTCTATTGCTGAGATCTATCTTCGCTGCTCCCTTTTACCAATGCCCTGGCTCTGCCCTGG
6mer			dual	Context_5	TCTACAGTCCGACGATCTCTGATATGCTAGACAAGGCTTGTTACTTTAGCGCTTTAATTAGGGCTTATTTACCTCCTAACTCCCAAAAGTCCTCAGGAGGTCATGGGGGGCAAATTTACCTCTTCTGATTCTATTGCTGAGATCTATCTTCGCTGCTCCCTTTTACCAATGCCCTGGCTCTGCCCTGG
8mer-w6			left	Context_5	TCTACAGTCCGACGATCTCTGATATGCTAGACAAGGCTTGTTACTTTAGCGCTTTAATTAGGGCTTATCTGCCTCATAACTCCCAAAAGTCCTCAGGAGGTCATGGGGGGCAAATTTCCTGTTTCTGATTCTATTGCTGAGATCTATCTTCGCTGCTCCCTTTTACCAATGCCCTGGCTCTGCCCTGG
8mer-w6			right	Context_5	TCTACAGTCCGACGATCTCTGATATGCTAGACAAGGCTTGTTACTTTAGCGCTTTAATTAGGGCTTATTCTTTCTCTAACTCCCAAAAGTCCTCAGGAGGTCATGGGGGGCAAATCTGCCTCATCTGATTCTATTGCTGAGATCTATCTTCGCTGCTCCCTTTTACCAATGCCCTGGCTCTGCCCTGG
8mer-w6			dual	Context_5	TCTACAGTCCGACGATCTCTGATATGCTAGACAAGGCTTGTTACTTTAGCGCTTTAATTAGGGCTTATCTGCCTCATAACTCCCAAAAGTCCTCAGGAGGTCATGGGGGGCAAATCTGCCTCATCTGATTCTATTGCTGAGATCTATCTTCGCTGCTCCCTTTTACCAATGCCCTGGCTCTGCCCTGG
8mer-w6	4mer-m13.16		left	Context_5	TCTACAGTCCGACGATCTCTGATATGCTAGACAAGGCTTGTTACTTTAGCGCTTTAATTAACAATTATCTGCCTCATAACTCCCAAAAGTCCTCAGGAGGTCATGGGGGGCAAATTTCCTGTTTCTGATTCTATTGCTGAGATCTATCTTCGCTGCTCCCTTTTACCAATGCCCTGGCTCTGCCCTGG
8mer-w6	4mer-m13.16		right	Context_5	TCTACAGTCCGACGATCTCTGATATGCTAGACAAGGCTTGTTACTTTAGCGCTTTAATTAGGGCTTATTCTTTCTCTAACTCCCAAAAGTCCTCAGGAGGTCATGGGACAAAAATCTGCCTCATCTGATTCTATTGCTGAGATCTATCTTCGCTGCTCCCTTTTACCAATGCCCTGGCTCTGCCCTGG
8mer-w6	4mer-m13.16		dual	Context_5	TCTACAGTCCGACGATCTCTGATATGCTAGACAAGGCTTGTTACTTTAGCGCTTTAATTAACAATTATCTGCCTCATAACTCCCAAAAGTCCTCAGGAGGTCATGGGACAAAAATCTGCCTCATCTGATTCTATTGCTGAGATCTATCTTCGCTGCTCCCTTTTACCAATGCCCTGGCTCTGCCCTGG
8mer-w6	4mer-m13.16	A	left	Context_5	TCTACAGTCCGACGATCTCTGATATGCTAGACAAGGCTTGTTACTTTAGCGCTTTAATTAACAATTAATCTGCCTCATAACTCCCAAAAGTCCTCAGGAGGTCATGGGGGGCAAATTTCCTGTTTCTGATTCTATTGCTGAGATCTATCTTCGCTGCTCCCTTTTACCAATGCCCTGGCTCTGCCCTG
8mer-w6	4mer-m13.16	A	right	Context_5	TCTACAGTCCGACGATCTCTGATATGCTAGACAAGGCTTGTTACTTTAGCGCTTTAATTAGGGCTTATTCTTTCTCTAACTCCCAAAAGTCCTCAGGAGGTCATGGGACAAAAAATCTGCCTCATCTGATTCTATTGCTGAGATCTATCTTCGCTGCTCCCTTTTACCAATGCCCTGGCTCTGCCCTG
8mer-w6	4mer-m13.16	A	dual	Context_5	TCTACAGTCCGACGATCTCTGATATGCTAGACAAGGCTTGTTACTTTAGCGCTTTAATTAACAATTAATCTGCCTCATAACTCCCAAAAGTCCTCAGGAGGTCATGGGACAAAAAATCTGCCTCATCTGATTCTATTGCTGAGATCTATCTTCGCTGCTCCCTTTTACCAATGCCCTGGCTCTGCCCT
8mer-w6	4mer-m13.16	AAAA	left	Context_5	TCTACAGTCCGACGATCTCTGATATGCTAGACAAGGCTTGTTACTTTAGCGCTTTAATTAACAATTAAAAATCTGCCTCATAACTCCCAAAAGTCCTCAGGAGGTCATGGGGGGCAAATTTCCTGTTTCTGATTCTATTGCTGAGATCTATCTTCGCTGCTCCCTTTTACCAATGCCCTGGCTCTGCC
8mer-w6	4mer-m13.16	AAAA	right	Context_5	TCTACAGTCCGACGATCTCTGATATGCTAGACAAGGCTTGTTACTTTAGCGCTTTAATTAGGGCTTATTCTTTCTCTAACTCCCAAAAGTCCTCAGGAGGTCATGGGACAAAAAAAAATCTGCCTCATCTGATTCTATTGCTGAGATCTATCTTCGCTGCTCCCTTTTACCAATGCCCTGGCTCTGCC
8mer-w6	4mer-m13.16	AAAA	dual	Context_5	TCTACAGTCCGACGATCTCTGATATGCTAGACAAGGCTTGTTACTTTAGCGCTTTAATTAACAATTAAAAATCTGCCTCATAACTCCCAAAAGTCCTCAGGAGGTCATGGGACAAAAAAAAATCTGCCTCATCTGATTCTATTGCTGAGATCTATCTTCGCTGCTCCCTTTTACCAATGCCCTGGCTC
8mer-w6	4mer-m13.16	T	left	Context_5	TCTACAGTCCGACGATCTCTGATATGCTAGACAAGGCTTGTTACTTTAGCGCTTTAATTAACAATTATTCTGCCTCATAACTCCCAAAAGTCCTCAGGAGGTCATGGGGGGCAAATTTCCTGTTTCTGATTCTATTGCTGAGATCTATCTTCGCTGCTCCCTTTTACCAATGCCCTGGCTCTGCCCTG
8mer-w6	4mer-m13.16	T	right	Context_5	TCTACAGTCCGACGATCTCTGATATGCTAGACAAGGCTTGTTACTTTAGCGCTTTAATTAGGGCTTATTCTTTCTCTAACTCCCAAAAGTCCTCAGGAGGTCATGGGACAAAAATTCTGCCTCATCTGATTCTATTGCTGAGATCTATCTTCGCTGCTCCCTTTTACCAATGCCCTGGCTCTGCCCTG
8mer-w6	4mer-m13.16	T	dual	Context_5	TCTACAGTCCGACGATCTCTGATATGCTAGACAAGGCTTGTTACTTTAGCGCTTTAATTAACAATTATTCTGCCTCATAACTCCCAAAAGTCCTCAGGAGGTCATGGGACAAAAATTCTGCCTCATCTGATTCTATTGCTGAGATCTATCTTCGCTGCTCCCTTTTACCAATGCCCTGGCTCTGCCCT
8mer-w6	4mer-m13.16	TTTT	left	Context_5	TCTACAGTCCGACGATCTCTGATATGCTAGACAAGGCTTGTTACTTTAGCGCTTTAATTAACAATTATTTTTCTGCCTCATAACTCCCAAAAGTCCTCAGGAGGTCATGGGGGGCAAATTTCCTGTTTCTGATTCTATTGCTGAGATCTATCTTCGCTGCTCCCTTTTACCAATGCCCTGGCTCTGCC
8mer-w6	4mer-m13.16	TTTT	right	Context_5	TCTACAGTCCGACGATCTCTGATATGCTAGACAAGGCTTGTTACTTTAGCGCTTTAATTAGGGCTTATTCTTTCTCTAACTCCCAAAAGTCCTCAGGAGGTCATGGGACAAAAATTTTTCTGCCTCATCTGATTCTATTGCTGAGATCTATCTTCGCTGCTCCCTTTTACCAATGCCCTGGCTCTGCC
8mer-w6	4mer-m13.16	TTTT	dual	Context_5	TCTACAGTCCGACGATCTCTGATATGCTAGACAAGGCTTGTTACTTTAGCGCTTTAATTAACAATTATTTTTCTGCCTCATAACTCCCAAAAGTCCTCAGGAGGTCATGGGACAAAAATTTTTCTGCCTCATCTGATTCTATTGCTGAGATCTATCTTCGCTGCTCCCTTTTACCAATGCCCTGGCTC
8mer-w6	9mer-m11.19		left	Context_5	TCTACAGTCCGACGATCTCTGATATGCTAGACAAGGCTTGTTACTTTAGCGCTTTAATATACAACCATCTGCCTCATAACTCCCAAAAGTCCTCAGGAGGTCATGGGGGGCAAATTTCCTGTTTCTGATTCTATTGCTGAGATCTATCTTCGCTGCTCCCTTTTACCAATGCCCTGGCTCTGCCCTGG
8mer-w6	9mer-m11.19		right	Context_5	TCTACAGTCCGACGATCTCTGATATGCTAGACAAGGCTTGTTACTTTAGCGCTTTAATTAGGGCTTATTCTTTCTCTAACTCCCAAAAGTCCTCAGGAGGTCATTATACAACCATCTGCCTCATCTGATTCTATTGCTGAGATCTATCTTCGCTGCTCCCTTTTACCAATGCCCTGGCTCTGCCCTGG
8mer-w6	9mer-m11.19		dual	Context_5	TCTACAGTCCGACGATCTCTGATATGCTAGACAAGGCTTGTTACTTTAGCGCTTTAATATACAACCATCTGCCTCATAACTCCCAAAAGTCCTCAGGAGGTCATTATACAACCATCTGCCTCATCTGATTCTATTGCTGAGATCTATCTTCGCTGCTCCCTTTTACCAATGCCCTGGCTCTGCCCTGG
8mer-w6	9mer-m11.19	A	left	Context_5	TCTACAGTCCGACGATCTCTGATATGCTAGACAAGGCTTGTTACTTTAGCGCTTTAATATACAACCAATCTGCCTCATAACTCCCAAAAGTCCTCAGGAGGTCATGGGGGGCAAATTTCCTGTTTCTGATTCTATTGCTGAGATCTATCTTCGCTGCTCCCTTTTACCAATGCCCTGGCTCTGCCCTG
8mer-w6	9mer-m11.19	A	right	Context_5	TCTACAGTCCGACGATCTCTGATATGCTAGACAAGGCTTGTTACTTTAGCGCTTTAATTAGGGCTTATTCTTTCTCTAACTCCCAAAAGTCCTCAGGAGGTCATTATACAACCAATCTGCCTCATCTGATTCTATTGCTGAGATCTATCTTCGCTGCTCCCTTTTACCAATGCCCTGGCTCTGCCCTG
8mer-w6	9mer-m11.19	A	dual	Context_5	TCTACAGTCCGACGATCTCTGATATGCTAGACAAGGCTTGTTACTTTAGCGCTTTAATATACAACCAATCTGCCTCATAACTCCCAAAAGTCCTCAGGAGGTCATTATACAACCAATCTGCCTCATCTGATTCTATTGCTGAGATCTATCTTCGCTGCTCCCTTTTACCAATGCCCTGGCTCTGCCCT
8mer-w6	9mer-m11.19	AAAA	left	Context_5	TCTACAGTCCGACGATCTCTGATATGCTAGACAAGGCTTGTTACTTTAGCGCTTTAATATACAACCAAAAATCTGCCTCATAACTCCCAAAAGTCCTCAGGAGGTCATGGGGGGCAAATTTCCTGTTTCTGATTCTATTGCTGAGATCTATCTTCGCTGCTCCCTTTTACCAATGCCCTGGCTCTGCC
8mer-w6	9mer-m11.19	AAAA	right	Context_5	TCTACAGTCCGACGATCTCTGATATGCTAGACAAGGCTTGTTACTTTAGCGCTTTAATTAGGGCTTATTCTTTCTCTAACTCCCAAAAGTCCTCAGGAGGTCATTATACAACCAAAAATCTGCCTCATCTGATTCTATTGCTGAGATCTATCTTCGCTGCTCCCTTTTACCAATGCCCTGGCTCTGCC
8mer-w6	9mer-m11.19	AAAA	dual	Context_5	TCTACAGTCCGACGATCTCTGATATGCTAGACAAGGCTTGTTACTTTAGCGCTTTAATATACAACCAAAAATCTGCCTCATAACTCCCAAAAGTCCTCAGGAGGTCATTATACAACCAAAAATCTGCCTCATCTGATTCTATTGCTGAGATCTATCTTCGCTGCTCCCTTTTACCAATGCCCTGGCTC
8mer-w6	9mer-m11.19	T	left	Context_5	TCTACAGTCCGACGATCTCTGATATGCTAGACAAGGCTTGTTACTTTAGCGCTTTAATATACAACCATTCTGCCTCATAACTCCCAAAAGTCCTCAGGAGGTCATGGGGGGCAAATTTCCTGTTTCTGATTCTATTGCTGAGATCTATCTTCGCTGCTCCCTTTTACCAATGCCCTGGCTCTGCCCTG
8mer-w6	9mer-m11.19	T	right	Context_5	TCTACAGTCCGACGATCTCTGATATGCTAGACAAGGCTTGTTACTTTAGCGCTTTAATTAGGGCTTATTCTTTCTCTAACTCCCAAAAGTCCTCAGGAGGTCATTATACAACCATTCTGCCTCATCTGATTCTATTGCTGAGATCTATCTTCGCTGCTCCCTTTTACCAATGCCCTGGCTCTGCCCTG
8mer-w6	9mer-m11.19	T	dual	Context_5	TCTACAGTCCGACGATCTCTGATATGCTAGACAAGGCTTGTTACTTTAGCGCTTTAATATACAACCATTCTGCCTCATAACTCCCAAAAGTCCTCAGGAGGTCATTATACAACCATTCTGCCTCATCTGATTCTATTGCTGAGATCTATCTTCGCTGCTCCCTTTTACCAATGCCCTGGCTCTGCCCT
8mer-w6	9mer-m11.19	TTTT	left	Context_5	TCTACAGTCCGACGATCTCTGATATGCTAGACAAGGCTTGTTACTTTAGCGCTTTAATATACAACCATTTTTCTGCCTCATAACTCCCAAAAGTCCTCAGGAGGTCATGGGGGGCAAATTTCCTGTTTCTGATTCTATTGCTGAGATCTATCTTCGCTGCTCCCTTTTACCAATGCCCTGGCTCTGCC
8mer-w6	9mer-m11.19	TTTT	right	Context_5	TCTACAGTCCGACGATCTCTGATATGCTAGACAAGGCTTGTTACTTTAGCGCTTTAATTAGGGCTTATTCTTTCTCTAACTCCCAAAAGTCCTCAGGAGGTCATTATACAACCATTTTTCTGCCTCATCTGATTCTATTGCTGAGATCTATCTTCGCTGCTCCCTTTTACCAATGCCCTGGCTCTGCC
8mer-w6	9mer-m11.19	TTTT	dual	Context_5	TCTACAGTCCGACGATCTCTGATATGCTAGACAAGGCTTGTTACTTTAGCGCTTTAATATACAACCATTTTTCTGCCTCATAACTCCCAAAAGTCCTCAGGAGGTCATTATACAACCATTTTTCTGCCTCATCTGATTCTATTGCTGAGATCTATCTTCGCTGCTCCCTTTTACCAATGCCCTGGCTC
8mer-w6	9mer-m13.21		left	Context_5	TCTACAGTCCGACGATCTCTGATATGCTAGACAAGGCTTGTTACTTTAGCGCTTTACTATACAATTATCTGCCTCATAACTCCCAAAAGTCCTCAGGAGGTCATGGGGGGCAAATTTCCTGTTTCTGATTCTATTGCTGAGATCTATCTTCGCTGCTCCCTTTTACCAATGCCCTGGCTCTGCCCTGG
8mer-w6	9mer-m13.21		right	Context_5	TCTACAGTCCGACGATCTCTGATATGCTAGACAAGGCTTGTTACTTTAGCGCTTTAATTAGGGCTTATTCTTTCTCTAACTCCCAAAAGTCCTCAGGAGGTCACTATACAAAAATCTGCCTCATCTGATTCTATTGCTGAGATCTATCTTCGCTGCTCCCTTTTACCAATGCCCTGGCTCTGCCCTGG
8mer-w6	9mer-m13.21		dual	Context_5	TCTACAGTCCGACGATCTCTGATATGCTAGACAAGGCTTGTTACTTTAGCGCTTTACTATACAATTATCTGCCTCATAACTCCCAAAAGTCCTCAGGAGGTCACTATACAAAAATCTGCCTCATCTGATTCTATTGCTGAGATCTATCTTCGCTGCTCCCTTTTACCAATGCCCTGGCTCTGCCCTGG
8mer-w6	9mer-m13.21	A	left	Context_5	TCTACAGTCCGACGATCTCTGATATGCTAGACAAGGCTTGTTACTTTAGCGCTTTACTATACAATTAATCTGCCTCATAACTCCCAAAAGTCCTCAGGAGGTCATGGGGGGCAAATTTCCTGTTTCTGATTCTATTGCTGAGATCTATCTTCGCTGCTCCCTTTTACCAATGCCCTGGCTCTGCCCTG
8mer-w6	9mer-m13.21	A	right	Context_5	TCTACAGTCCGACGATCTCTGATATGCTAGACAAGGCTTGTTACTTTAGCGCTTTAATTAGGGCTTATTCTTTCTCTAACTCCCAAAAGTCCTCAGGAGGTCACTATACAAAAAATCTGCCTCATCTGATTCTATTGCTGAGATCTATCTTCGCTGCTCCCTTTTACCAATGCCCTGGCTCTGCCCTG
8mer-w6	9mer-m13.21	A	dual	Context_5	TCTACAGTCCGACGATCTCTGATATGCTAGACAAGGCTTGTTACTTTAGCGCTTTACTATACAATTAATCTGCCTCATAACTCCCAAAAGTCCTCAGGAGGTCACTATACAAAAAATCTGCCTCATCTGATTCTATTGCTGAGATCTATCTTCGCTGCTCCCTTTTACCAATGCCCTGGCTCTGCCCT
8mer-w6	9mer-m13.21	AAAA	left	Context_5	TCTACAGTCCGACGATCTCTGATATGCTAGACAAGGCTTGTTACTTTAGCGCTTTACTATACAATTAAAAATCTGCCTCATAACTCCCAAAAGTCCTCAGGAGGTCATGGGGGGCAAATTTCCTGTTTCTGATTCTATTGCTGAGATCTATCTTCGCTGCTCCCTTTTACCAATGCCCTGGCTCTGCC
8mer-w6	9mer-m13.21	AAAA	right	Context_5	TCTACAGTCCGACGATCTCTGATATGCTAGACAAGGCTTGTTACTTTAGCGCTTTAATTAGGGCTTATTCTTTCTCTAACTCCCAAAAGTCCTCAGGAGGTCACTATACAAAAAAAAATCTGCCTCATCTGATTCTATTGCTGAGATCTATCTTCGCTGCTCCCTTTTACCAATGCCCTGGCTCTGCC
8mer-w6	9mer-m13.21	AAAA	dual	Context_5	TCTACAGTCCGACGATCTCTGATATGCTAGACAAGGCTTGTTACTTTAGCGCTTTACTATACAATTAAAAATCTGCCTCATAACTCCCAAAAGTCCTCAGGAGGTCACTATACAAAAAAAAATCTGCCTCATCTGATTCTATTGCTGAGATCTATCTTCGCTGCTCCCTTTTACCAATGCCCTGGCTC
8mer-w6	9mer-m13.21	T	left	Context_5	TCTACAGTCCGACGATCTCTGATATGCTAGACAAGGCTTGTTACTTTAGCGCTTTACTATACAATTATTCTGCCTCATAACTCCCAAAAGTCCTCAGGAGGTCATGGGGGGCAAATTTCCTGTTTCTGATTCTATTGCTGAGATCTATCTTCGCTGCTCCCTTTTACCAATGCCCTGGCTCTGCCCTG
8mer-w6	9mer-m13.21	T	right	Context_5	TCTACAGTCCGACGATCTCTGATATGCTAGACAAGGCTTGTTACTTTAGCGCTTTAATTAGGGCTTATTCTTTCTCTAACTCCCAAAAGTCCTCAGGAGGTCACTATACAAAAATTCTGCCTCATCTGATTCTATTGCTGAGATCTATCTTCGCTGCTCCCTTTTACCAATGCCCTGGCTCTGCCCTG
8mer-w6	9mer-m13.21	T	dual	Context_5	TCTACAGTCCGACGATCTCTGATATGCTAGACAAGGCTTGTTACTTTAGCGCTTTACTATACAATTATTCTGCCTCATAACTCCCAAAAGTCCTCAGGAGGTCACTATACAAAAATTCTGCCTCATCTGATTCTATTGCTGAGATCTATCTTCGCTGCTCCCTTTTACCAATGCCCTGGCTCTGCCCT
8mer-w6	9mer-m13.21	TTTT	left	Context_5	TCTACAGTCCGACGATCTCTGATATGCTAGACAAGGCTTGTTACTTTAGCGCTTTACTATACAATTATTTTTCTGCCTCATAACTCCCAAAAGTCCTCAGGAGGTCATGGGGGGCAAATTTCCTGTTTCTGATTCTATTGCTGAGATCTATCTTCGCTGCTCCCTTTTACCAATGCCCTGGCTCTGCC
8mer-w6	9mer-m13.21	TTTT	right	Context_5	TCTACAGTCCGACGATCTCTGATATGCTAGACAAGGCTTGTTACTTTAGCGCTTTAATTAGGGCTTATTCTTTCTCTAACTCCCAAAAGTCCTCAGGAGGTCACTATACAAAAATTTTTCTGCCTCATCTGATTCTATTGCTGAGATCTATCTTCGCTGCTCCCTTTTACCAATGCCCTGGCTCTGCC
8mer-w6	9mer-m13.21	TTTT	dual	Context_5	TCTACAGTCCGACGATCTCTGATATGCTAGACAAGGCTTGTTACTTTAGCGCTTTACTATACAATTATTTTTCTGCCTCATAACTCCCAAAAGTCCTCAGGAGGTCACTATACAAAAATTTTTCTGCCTCATCTGATTCTATTGCTGAGATCTATCTTCGCTGCTCCCTTTTACCAATGCCCTGGCTC
No_site_0				Context_5	TCTACAGTCCGACGATCTCTGATATGCTAGACAAGGCTTGTTACTTTAGCGCTTTAATTAGGGCTTATTCTTTCTCTAACTCCCAAAAGTCCTCAGGAGGTCATGGGGGGCAAATTTCCTGTTTCTGATTCTATTGCTGAGATCTATCTTCGCTGCTCCCTTTTACCAATGCCCTGGCTCTGCCCTGG
No_site_1				Context_5	TCTACAGTCCGACGATCTCTGATATGCTAGACAAGGCTTGTTACTTTAGCGCTTTAATGCTCCTTTTTAAAGTTGATAACTCCCAAAAGTCCTCAGGAGGTCATGCCTGTTGATAGGAAGGTTTCTGATTCTATTGCTGAGATCTATCTTCGCTGCTCCCTTTTACCAATGCCCTGGCTCTGCCCTGG
No_site_2				Context_5	TCTACAGTCCGACGATCTCTGATATGCTAGACAAGGCTTGTTACTTTAGCGCTTTAGAGGCTCAAAATAATTCCTTTAACTCCCAAAAGTCCTCAGGAGGTCATCACCTGCCTAGGAAGCAGCTCTGATTCTATTGCTGAGATCTATCTTCGCTGCTCCCTTTTACCAATGCCCTGGCTCTGCCCTGG
No_site_3				Context_5	TCTACAGTCCGACGATCTCTGATATGCTAGACAAGGCTTGTTACTTTAGCGCTTTAATTAAATATTTTTGGGGTGATAACTCCCAAAAGTCCTCAGGAGGTCACTGAATCTGACTTTACTGGGTCTGATTCTATTGCTGAGATCTATCTTCGCTGCTCCCTTTTACCAATGCCCTGGCTCTGCCCTGG
No_site_4				Context_5	TCTACAGTCCGACGATCTCTGATATGCTAGACAAGGCTTGTTACTTTAGCGCTTTACTTAATTTTTTAGATGACCCTAACTCCCAAAAGTCCTCAGGAGGTCAGACACTACTGGAGCTCTTCTTCTGATTCTATTGCTGAGATCTATCTTCGCTGCTCCCTTTTACCAATGCCCTGGCTCTGCCCTGG
No_site_5				Context_5	TCTACAGTCCGACGATCTCTGATATGCTAGACAAGGCTTGTTACTTTAGCGCTTTAGTGAGTGGAAATGGCCTAACTAACTCCCAAAAGTCCTCAGGAGGTCAAGTTTGGATTGAGAGGGGAATCTGATTCTATTGCTGAGATCTATCTTCGCTGCTCCCTTTTACCAATGCCCTGGCTCTGCCCTGG
No_site_6				Context_5	TCTACAGTCCGACGATCTCTGATATGCTAGACAAGGCTTGTTACTTTAGCGCTTTAAGCTGCTTTTAAATGACAAGTAACTCCCAAAAGTCCTCAGGAGGTCAGGTAAGCAATGTCCCTGAAATCTGATTCTATTGCTGAGATCTATCTTCGCTGCTCCCTTTTACCAATGCCCTGGCTCTGCCCTGG
lin-41	9mer-m11.19	T	dual	Context_6	TCTACAGTCCGACGATCTGTCTAAATCTAAATTAGCTACTTGTAACTGTCCCGGTGTTATACAACCATTCTACACTCACCAAAACATGCTTTAGAGTATAAGTCCATATACAACCATTCTGCCTCCAGAGCAGATTAAACGGATAAAATGCGTGCTGAAACTTCCTTACCAATGCCCTGGCTCTGCCC
8mer			left	Context_6	TCTACAGTCCGACGATCTGTCTAAATCTAAATTAGCTACTTGTAACTGTCCCGGTGTTGCTTTCGTATCTACCTCACCAAAACATGCTTTAGAGTATAAGTCCAGTATTAAAAATGAAGCAACAGAGCAGATTAAACGGATAAAATGCGTGCTGAAACTTCCTTACCAATGCCCTGGCTCTGCCCTGG
8mer			right	Context_6	TCTACAGTCCGACGATCTGTCTAAATCTAAATTAGCTACTTGTAACTGTCCCGGTGTTGCTTTCGTATGGAACAGGCCAAAACATGCTTTAGAGTATAAGTCCAGTATTAAAAATCTACCTCAAGAGCAGATTAAACGGATAAAATGCGTGCTGAAACTTCCTTACCAATGCCCTGGCTCTGCCCTGG
8mer			dual	Context_6	TCTACAGTCCGACGATCTGTCTAAATCTAAATTAGCTACTTGTAACTGTCCCGGTGTTGCTTTCGTATCTACCTCACCAAAACATGCTTTAGAGTATAAGTCCAGTATTAAAAATCTACCTCAAGAGCAGATTAAACGGATAAAATGCGTGCTGAAACTTCCTTACCAATGCCCTGGCTCTGCCCTGG
7mer-m8			left	Context_6	TCTACAGTCCGACGATCTGTCTAAATCTAAATTAGCTACTTGTAACTGTCCCGGTGTTGCTTTCGTATCTACCTCGCCAAAACATGCTTTAGAGTATAAGTCCAGTATTAAAAATGAAGCAACAGAGCAGATTAAACGGATAAAATGCGTGCTGAAACTTCCTTACCAATGCCCTGGCTCTGCCCTGG
7mer-m8			right	Context_6	TCTACAGTCCGACGATCTGTCTAAATCTAAATTAGCTACTTGTAACTGTCCCGGTGTTGCTTTCGTATGGAACAGGCCAAAACATGCTTTAGAGTATAAGTCCAGTATTAAAAATCTACCTCCAGAGCAGATTAAACGGATAAAATGCGTGCTGAAACTTCCTTACCAATGCCCTGGCTCTGCCCTGG
7mer-m8			dual	Context_6	TCTACAGTCCGACGATCTGTCTAAATCTAAATTAGCTACTTGTAACTGTCCCGGTGTTGCTTTCGTATCTACCTCGCCAAAACATGCTTTAGAGTATAAGTCCAGTATTAAAAATCTACCTCCAGAGCAGATTAAACGGATAAAATGCGTGCTGAAACTTCCTTACCAATGCCCTGGCTCTGCCCTGG
7mer-A1			left	Context_6	TCTACAGTCCGACGATCTGTCTAAATCTAAATTAGCTACTTGTAACTGTCCCGGTGTTGCTTTCGTATGTACCTCACCAAAACATGCTTTAGAGTATAAGTCCAGTATTAAAAATGAAGCAACAGAGCAGATTAAACGGATAAAATGCGTGCTGAAACTTCCTTACCAATGCCCTGGCTCTGCCCTGG
7mer-A1			right	Context_6	TCTACAGTCCGACGATCTGTCTAAATCTAAATTAGCTACTTGTAACTGTCCCGGTGTTGCTTTCGTATGGAACAGGCCAAAACATGCTTTAGAGTATAAGTCCAGTATTAAAAATGTACCTCAAGAGCAGATTAAACGGATAAAATGCGTGCTGAAACTTCCTTACCAATGCCCTGGCTCTGCCCTGG
7mer-A1			dual	Context_6	TCTACAGTCCGACGATCTGTCTAAATCTAAATTAGCTACTTGTAACTGTCCCGGTGTTGCTTTCGTATGTACCTCACCAAAACATGCTTTAGAGTATAAGTCCAGTATTAAAAATGTACCTCAAGAGCAGATTAAACGGATAAAATGCGTGCTGAAACTTCCTTACCAATGCCCTGGCTCTGCCCTGG
6mer			left	Context_6	TCTACAGTCCGACGATCTGTCTAAATCTAAATTAGCTACTTGTAACTGTCCCGGTGTTGCTTTCGTATGTACCTCGCCAAAACATGCTTTAGAGTATAAGTCCAGTATTAAAAATGAAGCAACAGAGCAGATTAAACGGATAAAATGCGTGCTGAAACTTCCTTACCAATGCCCTGGCTCTGCCCTGG
6mer			right	Context_6	TCTACAGTCCGACGATCTGTCTAAATCTAAATTAGCTACTTGTAACTGTCCCGGTGTTGCTTTCGTATGGAACAGGCCAAAACATGCTTTAGAGTATAAGTCCAGTATTAAAAATGTACCTCCAGAGCAGATTAAACGGATAAAATGCGTGCTGAAACTTCCTTACCAATGCCCTGGCTCTGCCCTGG
6mer			dual	Context_6	TCTACAGTCCGACGATCTGTCTAAATCTAAATTAGCTACTTGTAACTGTCCCGGTGTTGCTTTCGTATGTACCTCGCCAAAACATGCTTTAGAGTATAAGTCCAGTATTAAAAATGTACCTCCAGAGCAGATTAAACGGATAAAATGCGTGCTGAAACTTCCTTACCAATGCCCTGGCTCTGCCCTGG
8mer-w6			left	Context_6	TCTACAGTCCGACGATCTGTCTAAATCTAAATTAGCTACTTGTAACTGTCCCGGTGTTGCTTTCGTATCTGCCTCACCAAAACATGCTTTAGAGTATAAGTCCAGTATTAAAAATGAAGCAACAGAGCAGATTAAACGGATAAAATGCGTGCTGAAACTTCCTTACCAATGCCCTGGCTCTGCCCTGG
8mer-w6			right	Context_6	TCTACAGTCCGACGATCTGTCTAAATCTAAATTAGCTACTTGTAACTGTCCCGGTGTTGCTTTCGTATGGAACAGGCCAAAACATGCTTTAGAGTATAAGTCCAGTATTAAAAATCTGCCTCAAGAGCAGATTAAACGGATAAAATGCGTGCTGAAACTTCCTTACCAATGCCCTGGCTCTGCCCTGG
8mer-w6			dual	Context_6	TCTACAGTCCGACGATCTGTCTAAATCTAAATTAGCTACTTGTAACTGTCCCGGTGTTGCTTTCGTATCTGCCTCACCAAAACATGCTTTAGAGTATAAGTCCAGTATTAAAAATCTGCCTCAAGAGCAGATTAAACGGATAAAATGCGTGCTGAAACTTCCTTACCAATGCCCTGGCTCTGCCCTGG
8mer-w6	4mer-m13.16		left	Context_6	TCTACAGTCCGACGATCTGTCTAAATCTAAATTAGCTACTTGTAACTGTCCCGGTGTTGCACAAGTATCTGCCTCACCAAAACATGCTTTAGAGTATAAGTCCAGTATTAAAAATGAAGCAACAGAGCAGATTAAACGGATAAAATGCGTGCTGAAACTTCCTTACCAATGCCCTGGCTCTGCCCTGG
8mer-w6	4mer-m13.16		right	Context_6	TCTACAGTCCGACGATCTGTCTAAATCTAAATTAGCTACTTGTAACTGTCCCGGTGTTGCTTTCGTATGGAACAGGCCAAAACATGCTTTAGAGTATAAGTCCAGTAACAAAAATCTGCCTCAAGAGCAGATTAAACGGATAAAATGCGTGCTGAAACTTCCTTACCAATGCCCTGGCTCTGCCCTGG
8mer-w6	4mer-m13.16		dual	Context_6	TCTACAGTCCGACGATCTGTCTAAATCTAAATTAGCTACTTGTAACTGTCCCGGTGTTGCACAAGTATCTGCCTCACCAAAACATGCTTTAGAGTATAAGTCCAGTAACAAAAATCTGCCTCAAGAGCAGATTAAACGGATAAAATGCGTGCTGAAACTTCCTTACCAATGCCCTGGCTCTGCCCTGG
8mer-w6	4mer-m13.16	A	left	Context_6	TCTACAGTCCGACGATCTGTCTAAATCTAAATTAGCTACTTGTAACTGTCCCGGTGTTGCACAAGTAATCTGCCTCACCAAAACATGCTTTAGAGTATAAGTCCAGTATTAAAAATGAAGCAACAGAGCAGATTAAACGGATAAAATGCGTGCTGAAACTTCCTTACCAATGCCCTGGCTCTGCCCTG
8mer-w6	4mer-m13.16	A	right	Context_6	TCTACAGTCCGACGATCTGTCTAAATCTAAATTAGCTACTTGTAACTGTCCCGGTGTTGCTTTCGTATGGAACAGGCCAAAACATGCTTTAGAGTATAAGTCCAGTAACAAAAAATCTGCCTCAAGAGCAGATTAAACGGATAAAATGCGTGCTGAAACTTCCTTACCAATGCCCTGGCTCTGCCCTG
8mer-w6	4mer-m13.16	A	dual	Context_6	TCTACAGTCCGACGATCTGTCTAAATCTAAATTAGCTACTTGTAACTGTCCCGGTGTTGCACAAGTAATCTGCCTCACCAAAACATGCTTTAGAGTATAAGTCCAGTAACAAAAAATCTGCCTCAAGAGCAGATTAAACGGATAAAATGCGTGCTGAAACTTCCTTACCAATGCCCTGGCTCTGCCCT
8mer-w6	4mer-m13.16	AAAA	left	Context_6	TCTACAGTCCGACGATCTGTCTAAATCTAAATTAGCTACTTGTAACTGTCCCGGTGTTGCACAAGTAAAAATCTGCCTCACCAAAACATGCTTTAGAGTATAAGTCCAGTATTAAAAATGAAGCAACAGAGCAGATTAAACGGATAAAATGCGTGCTGAAACTTCCTTACCAATGCCCTGGCTCTGCC
8mer-w6	4mer-m13.16	AAAA	right	Context_6	TCTACAGTCCGACGATCTGTCTAAATCTAAATTAGCTACTTGTAACTGTCCCGGTGTTGCTTTCGTATGGAACAGGCCAAAACATGCTTTAGAGTATAAGTCCAGTAACAAAAAAAAATCTGCCTCAAGAGCAGATTAAACGGATAAAATGCGTGCTGAAACTTCCTTACCAATGCCCTGGCTCTGCC
8mer-w6	4mer-m13.16	AAAA	dual	Context_6	TCTACAGTCCGACGATCTGTCTAAATCTAAATTAGCTACTTGTAACTGTCCCGGTGTTGCACAAGTAAAAATCTGCCTCACCAAAACATGCTTTAGAGTATAAGTCCAGTAACAAAAAAAAATCTGCCTCAAGAGCAGATTAAACGGATAAAATGCGTGCTGAAACTTCCTTACCAATGCCCTGGCTC
8mer-w6	4mer-m13.16	T	left	Context_6	TCTACAGTCCGACGATCTGTCTAAATCTAAATTAGCTACTTGTAACTGTCCCGGTGTTGCACAAGTATTCTGCCTCACCAAAACATGCTTTAGAGTATAAGTCCAGTATTAAAAATGAAGCAACAGAGCAGATTAAACGGATAAAATGCGTGCTGAAACTTCCTTACCAATGCCCTGGCTCTGCCCTG
8mer-w6	4mer-m13.16	T	right	Context_6	TCTACAGTCCGACGATCTGTCTAAATCTAAATTAGCTACTTGTAACTGTCCCGGTGTTGCTTTCGTATGGAACAGGCCAAAACATGCTTTAGAGTATAAGTCCAGTAACAAAAATTCTGCCTCAAGAGCAGATTAAACGGATAAAATGCGTGCTGAAACTTCCTTACCAATGCCCTGGCTCTGCCCTG
8mer-w6	4mer-m13.16	T	dual	Context_6	TCTACAGTCCGACGATCTGTCTAAATCTAAATTAGCTACTTGTAACTGTCCCGGTGTTGCACAAGTATTCTGCCTCACCAAAACATGCTTTAGAGTATAAGTCCAGTAACAAAAATTCTGCCTCAAGAGCAGATTAAACGGATAAAATGCGTGCTGAAACTTCCTTACCAATGCCCTGGCTCTGCCCT
8mer-w6	4mer-m13.16	TTTT	left	Context_6	TCTACAGTCCGACGATCTGTCTAAATCTAAATTAGCTACTTGTAACTGTCCCGGTGTTGCACAAGTATTTTTCTGCCTCACCAAAACATGCTTTAGAGTATAAGTCCAGTATTAAAAATGAAGCAACAGAGCAGATTAAACGGATAAAATGCGTGCTGAAACTTCCTTACCAATGCCCTGGCTCTGCC
8mer-w6	4mer-m13.16	TTTT	right	Context_6	TCTACAGTCCGACGATCTGTCTAAATCTAAATTAGCTACTTGTAACTGTCCCGGTGTTGCTTTCGTATGGAACAGGCCAAAACATGCTTTAGAGTATAAGTCCAGTAACAAAAATTTTTCTGCCTCAAGAGCAGATTAAACGGATAAAATGCGTGCTGAAACTTCCTTACCAATGCCCTGGCTCTGCC
8mer-w6	4mer-m13.16	TTTT	dual	Context_6	TCTACAGTCCGACGATCTGTCTAAATCTAAATTAGCTACTTGTAACTGTCCCGGTGTTGCACAAGTATTTTTCTGCCTCACCAAAACATGCTTTAGAGTATAAGTCCAGTAACAAAAATTTTTCTGCCTCAAGAGCAGATTAAACGGATAAAATGCGTGCTGAAACTTCCTTACCAATGCCCTGGCTC
8mer-w6	9mer-m11.19		left	Context_6	TCTACAGTCCGACGATCTGTCTAAATCTAAATTAGCTACTTGTAACTGTCCCGGTGTTATACAACCATCTGCCTCACCAAAACATGCTTTAGAGTATAAGTCCAGTATTAAAAATGAAGCAACAGAGCAGATTAAACGGATAAAATGCGTGCTGAAACTTCCTTACCAATGCCCTGGCTCTGCCCTGG
8mer-w6	9mer-m11.19		right	Context_6	TCTACAGTCCGACGATCTGTCTAAATCTAAATTAGCTACTTGTAACTGTCCCGGTGTTGCTTTCGTATGGAACAGGCCAAAACATGCTTTAGAGTATAAGTCCATATACAACCATCTGCCTCAAGAGCAGATTAAACGGATAAAATGCGTGCTGAAACTTCCTTACCAATGCCCTGGCTCTGCCCTGG
8mer-w6	9mer-m11.19		dual	Context_6	TCTACAGTCCGACGATCTGTCTAAATCTAAATTAGCTACTTGTAACTGTCCCGGTGTTATACAACCATCTGCCTCACCAAAACATGCTTTAGAGTATAAGTCCATATACAACCATCTGCCTCAAGAGCAGATTAAACGGATAAAATGCGTGCTGAAACTTCCTTACCAATGCCCTGGCTCTGCCCTGG
8mer-w6	9mer-m11.19	A	left	Context_6	TCTACAGTCCGACGATCTGTCTAAATCTAAATTAGCTACTTGTAACTGTCCCGGTGTTATACAACCAATCTGCCTCACCAAAACATGCTTTAGAGTATAAGTCCAGTATTAAAAATGAAGCAACAGAGCAGATTAAACGGATAAAATGCGTGCTGAAACTTCCTTACCAATGCCCTGGCTCTGCCCTG
8mer-w6	9mer-m11.19	A	right	Context_6	TCTACAGTCCGACGATCTGTCTAAATCTAAATTAGCTACTTGTAACTGTCCCGGTGTTGCTTTCGTATGGAACAGGCCAAAACATGCTTTAGAGTATAAGTCCATATACAACCAATCTGCCTCAAGAGCAGATTAAACGGATAAAATGCGTGCTGAAACTTCCTTACCAATGCCCTGGCTCTGCCCTG
8mer-w6	9mer-m11.19	A	dual	Context_6	TCTACAGTCCGACGATCTGTCTAAATCTAAATTAGCTACTTGTAACTGTCCCGGTGTTATACAACCAATCTGCCTCACCAAAACATGCTTTAGAGTATAAGTCCATATACAACCAATCTGCCTCAAGAGCAGATTAAACGGATAAAATGCGTGCTGAAACTTCCTTACCAATGCCCTGGCTCTGCCCT
8mer-w6	9mer-m11.19	AAAA	left	Context_6	TCTACAGTCCGACGATCTGTCTAAATCTAAATTAGCTACTTGTAACTGTCCCGGTGTTATACAACCAAAAATCTGCCTCACCAAAACATGCTTTAGAGTATAAGTCCAGTATTAAAAATGAAGCAACAGAGCAGATTAAACGGATAAAATGCGTGCTGAAACTTCCTTACCAATGCCCTGGCTCTGCC
8mer-w6	9mer-m11.19	AAAA	right	Context_6	TCTACAGTCCGACGATCTGTCTAAATCTAAATTAGCTACTTGTAACTGTCCCGGTGTTGCTTTCGTATGGAACAGGCCAAAACATGCTTTAGAGTATAAGTCCATATACAACCAAAAATCTGCCTCAAGAGCAGATTAAACGGATAAAATGCGTGCTGAAACTTCCTTACCAATGCCCTGGCTCTGCC
8mer-w6	9mer-m11.19	AAAA	dual	Context_6	TCTACAGTCCGACGATCTGTCTAAATCTAAATTAGCTACTTGTAACTGTCCCGGTGTTATACAACCAAAAATCTGCCTCACCAAAACATGCTTTAGAGTATAAGTCCATATACAACCAAAAATCTGCCTCAAGAGCAGATTAAACGGATAAAATGCGTGCTGAAACTTCCTTACCAATGCCCTGGCTC
8mer-w6	9mer-m11.19	T	left	Context_6	TCTACAGTCCGACGATCTGTCTAAATCTAAATTAGCTACTTGTAACTGTCCCGGTGTTATACAACCATTCTGCCTCACCAAAACATGCTTTAGAGTATAAGTCCAGTATTAAAAATGAAGCAACAGAGCAGATTAAACGGATAAAATGCGTGCTGAAACTTCCTTACCAATGCCCTGGCTCTGCCCTG
8mer-w6	9mer-m11.19	T	right	Context_6	TCTACAGTCCGACGATCTGTCTAAATCTAAATTAGCTACTTGTAACTGTCCCGGTGTTGCTTTCGTATGGAACAGGCCAAAACATGCTTTAGAGTATAAGTCCATATACAACCATTCTGCCTCAAGAGCAGATTAAACGGATAAAATGCGTGCTGAAACTTCCTTACCAATGCCCTGGCTCTGCCCTG
8mer-w6	9mer-m11.19	T	dual	Context_6	TCTACAGTCCGACGATCTGTCTAAATCTAAATTAGCTACTTGTAACTGTCCCGGTGTTATACAACCATTCTGCCTCACCAAAACATGCTTTAGAGTATAAGTCCATATACAACCATTCTGCCTCAAGAGCAGATTAAACGGATAAAATGCGTGCTGAAACTTCCTTACCAATGCCCTGGCTCTGCCCT
8mer-w6	9mer-m11.19	TTTT	left	Context_6	TCTACAGTCCGACGATCTGTCTAAATCTAAATTAGCTACTTGTAACTGTCCCGGTGTTATACAACCATTTTTCTGCCTCACCAAAACATGCTTTAGAGTATAAGTCCAGTATTAAAAATGAAGCAACAGAGCAGATTAAACGGATAAAATGCGTGCTGAAACTTCCTTACCAATGCCCTGGCTCTGCC
8mer-w6	9mer-m11.19	TTTT	right	Context_6	TCTACAGTCCGACGATCTGTCTAAATCTAAATTAGCTACTTGTAACTGTCCCGGTGTTGCTTTCGTATGGAACAGGCCAAAACATGCTTTAGAGTATAAGTCCATATACAACCATTTTTCTGCCTCAAGAGCAGATTAAACGGATAAAATGCGTGCTGAAACTTCCTTACCAATGCCCTGGCTCTGCC
8mer-w6	9mer-m11.19	TTTT	dual	Context_6	TCTACAGTCCGACGATCTGTCTAAATCTAAATTAGCTACTTGTAACTGTCCCGGTGTTATACAACCATTTTTCTGCCTCACCAAAACATGCTTTAGAGTATAAGTCCATATACAACCATTTTTCTGCCTCAAGAGCAGATTAAACGGATAAAATGCGTGCTGAAACTTCCTTACCAATGCCCTGGCTC
8mer-w6	9mer-m13.21		left	Context_6	TCTACAGTCCGACGATCTGTCTAAATCTAAATTAGCTACTTGTAACTGTCCCGGTACTATACAAGTATCTGCCTCACCAAAACATGCTTTAGAGTATAAGTCCAGTATTAAAAATGAAGCAACAGAGCAGATTAAACGGATAAAATGCGTGCTGAAACTTCCTTACCAATGCCCTGGCTCTGCCCTGG
8mer-w6	9mer-m13.21		right	Context_6	TCTACAGTCCGACGATCTGTCTAAATCTAAATTAGCTACTTGTAACTGTCCCGGTGTTGCTTTCGTATGGAACAGGCCAAAACATGCTTTAGAGTATAAGTCACTATACAAAAATCTGCCTCAAGAGCAGATTAAACGGATAAAATGCGTGCTGAAACTTCCTTACCAATGCCCTGGCTCTGCCCTGG
8mer-w6	9mer-m13.21		dual	Context_6	TCTACAGTCCGACGATCTGTCTAAATCTAAATTAGCTACTTGTAACTGTCCCGGTACTATACAAGTATCTGCCTCACCAAAACATGCTTTAGAGTATAAGTCACTATACAAAAATCTGCCTCAAGAGCAGATTAAACGGATAAAATGCGTGCTGAAACTTCCTTACCAATGCCCTGGCTCTGCCCTGG
8mer-w6	9mer-m13.21	A	left	Context_6	TCTACAGTCCGACGATCTGTCTAAATCTAAATTAGCTACTTGTAACTGTCCCGGTACTATACAAGTAATCTGCCTCACCAAAACATGCTTTAGAGTATAAGTCCAGTATTAAAAATGAAGCAACAGAGCAGATTAAACGGATAAAATGCGTGCTGAAACTTCCTTACCAATGCCCTGGCTCTGCCCTG
8mer-w6	9mer-m13.21	A	right	Context_6	TCTACAGTCCGACGATCTGTCTAAATCTAAATTAGCTACTTGTAACTGTCCCGGTGTTGCTTTCGTATGGAACAGGCCAAAACATGCTTTAGAGTATAAGTCACTATACAAAAAATCTGCCTCAAGAGCAGATTAAACGGATAAAATGCGTGCTGAAACTTCCTTACCAATGCCCTGGCTCTGCCCTG
8mer-w6	9mer-m13.21	A	dual	Context_6	TCTACAGTCCGACGATCTGTCTAAATCTAAATTAGCTACTTGTAACTGTCCCGGTACTATACAAGTAATCTGCCTCACCAAAACATGCTTTAGAGTATAAGTCACTATACAAAAAATCTGCCTCAAGAGCAGATTAAACGGATAAAATGCGTGCTGAAACTTCCTTACCAATGCCCTGGCTCTGCCCT
8mer-w6	9mer-m13.21	AAAA	left	Context_6	TCTACAGTCCGACGATCTGTCTAAATCTAAATTAGCTACTTGTAACTGTCCCGGTACTATACAAGTAAAAATCTGCCTCACCAAAACATGCTTTAGAGTATAAGTCCAGTATTAAAAATGAAGCAACAGAGCAGATTAAACGGATAAAATGCGTGCTGAAACTTCCTTACCAATGCCCTGGCTCTGCC
8mer-w6	9mer-m13.21	AAAA	right	Context_6	TCTACAGTCCGACGATCTGTCTAAATCTAAATTAGCTACTTGTAACTGTCCCGGTGTTGCTTTCGTATGGAACAGGCCAAAACATGCTTTAGAGTATAAGTCACTATACAAAAAAAAATCTGCCTCAAGAGCAGATTAAACGGATAAAATGCGTGCTGAAACTTCCTTACCAATGCCCTGGCTCTGCC
8mer-w6	9mer-m13.21	AAAA	dual	Context_6	TCTACAGTCCGACGATCTGTCTAAATCTAAATTAGCTACTTGTAACTGTCCCGGTACTATACAAGTAAAAATCTGCCTCACCAAAACATGCTTTAGAGTATAAGTCACTATACAAAAAAAAATCTGCCTCAAGAGCAGATTAAACGGATAAAATGCGTGCTGAAACTTCCTTACCAATGCCCTGGCTC
8mer-w6	9mer-m13.21	T	left	Context_6	TCTACAGTCCGACGATCTGTCTAAATCTAAATTAGCTACTTGTAACTGTCCCGGTACTATACAAGTATTCTGCCTCACCAAAACATGCTTTAGAGTATAAGTCCAGTATTAAAAATGAAGCAACAGAGCAGATTAAACGGATAAAATGCGTGCTGAAACTTCCTTACCAATGCCCTGGCTCTGCCCTG
8mer-w6	9mer-m13.21	T	right	Context_6	TCTACAGTCCGACGATCTGTCTAAATCTAAATTAGCTACTTGTAACTGTCCCGGTGTTGCTTTCGTATGGAACAGGCCAAAACATGCTTTAGAGTATAAGTCACTATACAAAAATTCTGCCTCAAGAGCAGATTAAACGGATAAAATGCGTGCTGAAACTTCCTTACCAATGCCCTGGCTCTGCCCTG
8mer-w6	9mer-m13.21	T	dual	Context_6	TCTACAGTCCGACGATCTGTCTAAATCTAAATTAGCTACTTGTAACTGTCCCGGTACTATACAAGTATTCTGCCTCACCAAAACATGCTTTAGAGTATAAGTCACTATACAAAAATTCTGCCTCAAGAGCAGATTAAACGGATAAAATGCGTGCTGAAACTTCCTTACCAATGCCCTGGCTCTGCCCT
8mer-w6	9mer-m13.21	TTTT	left	Context_6	TCTACAGTCCGACGATCTGTCTAAATCTAAATTAGCTACTTGTAACTGTCCCGGTACTATACAAGTATTTTTCTGCCTCACCAAAACATGCTTTAGAGTATAAGTCCAGTATTAAAAATGAAGCAACAGAGCAGATTAAACGGATAAAATGCGTGCTGAAACTTCCTTACCAATGCCCTGGCTCTGCC
8mer-w6	9mer-m13.21	TTTT	right	Context_6	TCTACAGTCCGACGATCTGTCTAAATCTAAATTAGCTACTTGTAACTGTCCCGGTGTTGCTTTCGTATGGAACAGGCCAAAACATGCTTTAGAGTATAAGTCACTATACAAAAATTTTTCTGCCTCAAGAGCAGATTAAACGGATAAAATGCGTGCTGAAACTTCCTTACCAATGCCCTGGCTCTGCC
8mer-w6	9mer-m13.21	TTTT	dual	Context_6	TCTACAGTCCGACGATCTGTCTAAATCTAAATTAGCTACTTGTAACTGTCCCGGTACTATACAAGTATTTTTCTGCCTCACCAAAACATGCTTTAGAGTATAAGTCACTATACAAAAATTTTTCTGCCTCAAGAGCAGATTAAACGGATAAAATGCGTGCTGAAACTTCCTTACCAATGCCCTGGCTC
No_site_0				Context_6	TCTACAGTCCGACGATCTGTCTAAATCTAAATTAGCTACTTGTAACTGTCCCGGTGTTGCTTTCGTATGGAACAGGCCAAAACATGCTTTAGAGTATAAGTCCAGTATTAAAAATGAAGCAACAGAGCAGATTAAACGGATAAAATGCGTGCTGAAACTTCCTTACCAATGCCCTGGCTCTGCCCTGG
No_site_1				Context_6	TCTACAGTCCGACGATCTGTCTAAATCTAAATTAGCTACTTGTAACTGTCCCGGTGAGTGTAACAATTAAAGGAACCCAAAACATGCTTTAGAGTATAAGTCCGGCTATAACCTCTGATTCAAAGAGCAGATTAAACGGATAAAATGCGTGCTGAAACTTCCTTACCAATGCCCTGGCTCTGCCCTGG
No_site_2				Context_6	TCTACAGTCCGACGATCTGTCTAAATCTAAATTAGCTACTTGTAACTGTCCCGGTGCTTCCTTTTTTTTCCCTAAGCCAAAACATGCTTTAGAGTATAAGTCCCTGTGGTACTGTTCATGAATAGAGCAGATTAAACGGATAAAATGCGTGCTGAAACTTCCTTACCAATGCCCTGGCTCTGCCCTGG
No_site_3				Context_6	TCTACAGTCCGACGATCTGTCTAAATCTAAATTAGCTACTTGTAACTGTCCCGGTGAAAGCTATATTTTCAAAATACCAAAACATGCTTTAGAGTATAAGTCCTGTCCCCACCGAAACCCTGGAGAGCAGATTAAACGGATAAAATGCGTGCTGAAACTTCCTTACCAATGCCCTGGCTCTGCCCTGG
No_site_4				Context_6	TCTACAGTCCGACGATCTGTCTAAATCTAAATTAGCTACTTGTAACTGTCCCGGTGGGTCATTATAATACATCAGCCCAAAACATGCTTTAGAGTATAAGTCCAGTAGTGCTTGCCAAACCACAGAGCAGATTAAACGGATAAAATGCGTGCTGAAACTTCCTTACCAATGCCCTGGCTCTGCCCTGG
No_site_5				Context_6	TCTACAGTCCGACGATCTGTCTAAATCTAAATTAGCTACTTGTAACTGTCCCGGTGGAAGTCTAATTTTGCTTGAGCCAAAACATGCTTTAGAGTATAAGTCCACCTTTTGGAAATCCCTACCAGAGCAGATTAAACGGATAAAATGCGTGCTGAAACTTCCTTACCAATGCCCTGGCTCTGCCCTGG
No_site_6				Context_6	TCTACAGTCCGACGATCTGTCTAAATCTAAATTAGCTACTTGTAACTGTCCCGGTGTAGGGGTTTTAAGAGTGGCACCAAAACATGCTTTAGAGTATAAGTCCTAGAGAACTCCCTCTGGCCTAGAGCAGATTAAACGGATAAAATGCGTGCTGAAACTTCCTTACCAATGCCCTGGCTCTGCCCTGG
lin-41	9mer-m11.19	T	dual	Context_7	TCTACAGTCCGACGATCAAGTGGAGTTACCTAGGGTGCCAGGACTTCCCCTTCTTAGTATACAACCATTCTACACTCATTGATCTCTTCTGATACACCCTAGGGTTTATACAACCATTCTGCCTCTTGATTTCCCTCTTGCAACAATGCTATGGCTTTGTAAAGGGTACCAATGCCCTGGCTCTGCCC
8mer			left	Context_7	TCTACAGTCCGACGATCAAGTGGAGTTACCTAGGGTGCCAGGACTTCCCCTTCTTAGAAGAGTTAAATCTACCTCATTGATCTCTTCTGATACACCCTAGGGTTTAGTATGAAATGCCAGGGTTGATTTCCCTCTTGCAACAATGCTATGGCTTTGTAAAGGGTACCAATGCCCTGGCTCTGCCCTGG
8mer			right	Context_7	TCTACAGTCCGACGATCAAGTGGAGTTACCTAGGGTGCCAGGACTTCCCCTTCTTAGAAGAGTTAAATGGACCTTTTTGATCTCTTCTGATACACCCTAGGGTTTAGTATGAAATCTACCTCATGATTTCCCTCTTGCAACAATGCTATGGCTTTGTAAAGGGTACCAATGCCCTGGCTCTGCCCTGG
8mer			dual	Context_7	TCTACAGTCCGACGATCAAGTGGAGTTACCTAGGGTGCCAGGACTTCCCCTTCTTAGAAGAGTTAAATCTACCTCATTGATCTCTTCTGATACACCCTAGGGTTTAGTATGAAATCTACCTCATGATTTCCCTCTTGCAACAATGCTATGGCTTTGTAAAGGGTACCAATGCCCTGGCTCTGCCCTGG
7mer-m8			left	Context_7	TCTACAGTCCGACGATCAAGTGGAGTTACCTAGGGTGCCAGGACTTCCCCTTCTTAGAAGAGTTAAATCTACCTCTTTGATCTCTTCTGATACACCCTAGGGTTTAGTATGAAATGCCAGGGTTGATTTCCCTCTTGCAACAATGCTATGGCTTTGTAAAGGGTACCAATGCCCTGGCTCTGCCCTGG
7mer-m8			right	Context_7	TCTACAGTCCGACGATCAAGTGGAGTTACCTAGGGTGCCAGGACTTCCCCTTCTTAGAAGAGTTAAATGGACCTTTTTGATCTCTTCTGATACACCCTAGGGTTTAGTATGAAATCTACCTCTTGATTTCCCTCTTGCAACAATGCTATGGCTTTGTAAAGGGTACCAATGCCCTGGCTCTGCCCTGG
7mer-m8			dual	Context_7	TCTACAGTCCGACGATCAAGTGGAGTTACCTAGGGTGCCAGGACTTCCCCTTCTTAGAAGAGTTAAATCTACCTCTTTGATCTCTTCTGATACACCCTAGGGTTTAGTATGAAATCTACCTCTTGATTTCCCTCTTGCAACAATGCTATGGCTTTGTAAAGGGTACCAATGCCCTGGCTCTGCCCTGG
7mer-A1			left	Context_7	TCTACAGTCCGACGATCAAGTGGAGTTACCTAGGGTGCCAGGACTTCCCCTTCTTAGAAGAGTTAAATGTACCTCATTGATCTCTTCTGATACACCCTAGGGTTTAGTATGAAATGCCAGGGTTGATTTCCCTCTTGCAACAATGCTATGGCTTTGTAAAGGGTACCAATGCCCTGGCTCTGCCCTGG
7mer-A1			right	Context_7	TCTACAGTCCGACGATCAAGTGGAGTTACCTAGGGTGCCAGGACTTCCCCTTCTTAGAAGAGTTAAATGGACCTTTTTGATCTCTTCTGATACACCCTAGGGTTTAGTATGAAATGTACCTCATGATTTCCCTCTTGCAACAATGCTATGGCTTTGTAAAGGGTACCAATGCCCTGGCTCTGCCCTGG
7mer-A1			dual	Context_7	TCTACAGTCCGACGATCAAGTGGAGTTACCTAGGGTGCCAGGACTTCCCCTTCTTAGAAGAGTTAAATGTACCTCATTGATCTCTTCTGATACACCCTAGGGTTTAGTATGAAATGTACCTCATGATTTCCCTCTTGCAACAATGCTATGGCTTTGTAAAGGGTACCAATGCCCTGGCTCTGCCCTGG
6mer			left	Context_7	TCTACAGTCCGACGATCAAGTGGAGTTACCTAGGGTGCCAGGACTTCCCCTTCTTAGAAGAGTTAAATGTACCTCTTTGATCTCTTCTGATACACCCTAGGGTTTAGTATGAAATGCCAGGGTTGATTTCCCTCTTGCAACAATGCTATGGCTTTGTAAAGGGTACCAATGCCCTGGCTCTGCCCTGG
6mer			right	Context_7	TCTACAGTCCGACGATCAAGTGGAGTTACCTAGGGTGCCAGGACTTCCCCTTCTTAGAAGAGTTAAATGGACCTTTTTGATCTCTTCTGATACACCCTAGGGTTTAGTATGAAATGTACCTCTTGATTTCCCTCTTGCAACAATGCTATGGCTTTGTAAAGGGTACCAATGCCCTGGCTCTGCCCTGG
6mer			dual	Context_7	TCTACAGTCCGACGATCAAGTGGAGTTACCTAGGGTGCCAGGACTTCCCCTTCTTAGAAGAGTTAAATGTACCTCTTTGATCTCTTCTGATACACCCTAGGGTTTAGTATGAAATGTACCTCTTGATTTCCCTCTTGCAACAATGCTATGGCTTTGTAAAGGGTACCAATGCCCTGGCTCTGCCCTGG
8mer-w6			left	Context_7	TCTACAGTCCGACGATCAAGTGGAGTTACCTAGGGTGCCAGGACTTCCCCTTCTTAGAAGAGTTAAATCTGCCTCATTGATCTCTTCTGATACACCCTAGGGTTTAGTATGAAATGCCAGGGTTGATTTCCCTCTTGCAACAATGCTATGGCTTTGTAAAGGGTACCAATGCCCTGGCTCTGCCCTGG
8mer-w6			right	Context_7	TCTACAGTCCGACGATCAAGTGGAGTTACCTAGGGTGCCAGGACTTCCCCTTCTTAGAAGAGTTAAATGGACCTTTTTGATCTCTTCTGATACACCCTAGGGTTTAGTATGAAATCTGCCTCATGATTTCCCTCTTGCAACAATGCTATGGCTTTGTAAAGGGTACCAATGCCCTGGCTCTGCCCTGG
8mer-w6			dual	Context_7	TCTACAGTCCGACGATCAAGTGGAGTTACCTAGGGTGCCAGGACTTCCCCTTCTTAGAAGAGTTAAATCTGCCTCATTGATCTCTTCTGATACACCCTAGGGTTTAGTATGAAATCTGCCTCATGATTTCCCTCTTGCAACAATGCTATGGCTTTGTAAAGGGTACCAATGCCCTGGCTCTGCCCTGG
8mer-w6	4mer-m13.16		left	Context_7	TCTACAGTCCGACGATCAAGTGGAGTTACCTAGGGTGCCAGGACTTCCCCTTCTTAGAAGACAAAAATCTGCCTCATTGATCTCTTCTGATACACCCTAGGGTTTAGTATGAAATGCCAGGGTTGATTTCCCTCTTGCAACAATGCTATGGCTTTGTAAAGGGTACCAATGCCCTGGCTCTGCCCTGG
8mer-w6	4mer-m13.16		right	Context_7	TCTACAGTCCGACGATCAAGTGGAGTTACCTAGGGTGCCAGGACTTCCCCTTCTTAGAAGAGTTAAATGGACCTTTTTGATCTCTTCTGATACACCCTAGGGTTTAGACAAAAATCTGCCTCATGATTTCCCTCTTGCAACAATGCTATGGCTTTGTAAAGGGTACCAATGCCCTGGCTCTGCCCTGG
8mer-w6	4mer-m13.16		dual	Context_7	TCTACAGTCCGACGATCAAGTGGAGTTACCTAGGGTGCCAGGACTTCCCCTTCTTAGAAGACAAAAATCTGCCTCATTGATCTCTTCTGATACACCCTAGGGTTTAGACAAAAATCTGCCTCATGATTTCCCTCTTGCAACAATGCTATGGCTTTGTAAAGGGTACCAATGCCCTGGCTCTGCCCTGG
8mer-w6	4mer-m13.16	A	left	Context_7	TCTACAGTCCGACGATCAAGTGGAGTTACCTAGGGTGCCAGGACTTCCCCTTCTTAGAAGACAAAAAATCTGCCTCATTGATCTCTTCTGATACACCCTAGGGTTTAGTATGAAATGCCAGGGTTGATTTCCCTCTTGCAACAATGCTATGGCTTTGTAAAGGGTACCAATGCCCTGGCTCTGCCCTG
8mer-w6	4mer-m13.16	A	right	Context_7	TCTACAGTCCGACGATCAAGTGGAGTTACCTAGGGTGCCAGGACTTCCCCTTCTTAGAAGAGTTAAATGGACCTTTTTGATCTCTTCTGATACACCCTAGGGTTTAGACAAAAAATCTGCCTCATGATTTCCCTCTTGCAACAATGCTATGGCTTTGTAAAGGGTACCAATGCCCTGGCTCTGCCCTG
8mer-w6	4mer-m13.16	A	dual	Context_7	TCTACAGTCCGACGATCAAGTGGAGTTACCTAGGGTGCCAGGACTTCCCCTTCTTAGAAGACAAAAAATCTGCCTCATTGATCTCTTCTGATACACCCTAGGGTTTAGACAAAAAATCTGCCTCATGATTTCCCTCTTGCAACAATGCTATGGCTTTGTAAAGGGTACCAATGCCCTGGCTCTGCCCT
8mer-w6	4mer-m13.16	AAAA	left	Context_7	TCTACAGTCCGACGATCAAGTGGAGTTACCTAGGGTGCCAGGACTTCCCCTTCTTAGAAGACAAAAAAAAATCTGCCTCATTGATCTCTTCTGATACACCCTAGGGTTTAGTATGAAATGCCAGGGTTGATTTCCCTCTTGCAACAATGCTATGGCTTTGTAAAGGGTACCAATGCCCTGGCTCTGCC
8mer-w6	4mer-m13.16	AAAA	right	Context_7	TCTACAGTCCGACGATCAAGTGGAGTTACCTAGGGTGCCAGGACTTCCCCTTCTTAGAAGAGTTAAATGGACCTTTTTGATCTCTTCTGATACACCCTAGGGTTTAGACAAAAAAAAATCTGCCTCATGATTTCCCTCTTGCAACAATGCTATGGCTTTGTAAAGGGTACCAATGCCCTGGCTCTGCC
8mer-w6	4mer-m13.16	AAAA	dual	Context_7	TCTACAGTCCGACGATCAAGTGGAGTTACCTAGGGTGCCAGGACTTCCCCTTCTTAGAAGACAAAAAAAAATCTGCCTCATTGATCTCTTCTGATACACCCTAGGGTTTAGACAAAAAAAAATCTGCCTCATGATTTCCCTCTTGCAACAATGCTATGGCTTTGTAAAGGGTACCAATGCCCTGGCTC
8mer-w6	4mer-m13.16	T	left	Context_7	TCTACAGTCCGACGATCAAGTGGAGTTACCTAGGGTGCCAGGACTTCCCCTTCTTAGAAGACAAAAATTCTGCCTCATTGATCTCTTCTGATACACCCTAGGGTTTAGTATGAAATGCCAGGGTTGATTTCCCTCTTGCAACAATGCTATGGCTTTGTAAAGGGTACCAATGCCCTGGCTCTGCCCTG
8mer-w6	4mer-m13.16	T	right	Context_7	TCTACAGTCCGACGATCAAGTGGAGTTACCTAGGGTGCCAGGACTTCCCCTTCTTAGAAGAGTTAAATGGACCTTTTTGATCTCTTCTGATACACCCTAGGGTTTAGACAAAAATTCTGCCTCATGATTTCCCTCTTGCAACAATGCTATGGCTTTGTAAAGGGTACCAATGCCCTGGCTCTGCCCTG
8mer-w6	4mer-m13.16	T	dual	Context_7	TCTACAGTCCGACGATCAAGTGGAGTTACCTAGGGTGCCAGGACTTCCCCTTCTTAGAAGACAAAAATTCTGCCTCATTGATCTCTTCTGATACACCCTAGGGTTTAGACAAAAATTCTGCCTCATGATTTCCCTCTTGCAACAATGCTATGGCTTTGTAAAGGGTACCAATGCCCTGGCTCTGCCCT
8mer-w6	4mer-m13.16	TTTT	left	Context_7	TCTACAGTCCGACGATCAAGTGGAGTTACCTAGGGTGCCAGGACTTCCCCTTCTTAGAAGACAAAAATTTTTCTGCCTCATTGATCTCTTCTGATACACCCTAGGGTTTAGTATGAAATGCCAGGGTTGATTTCCCTCTTGCAACAATGCTATGGCTTTGTAAAGGGTACCAATGCCCTGGCTCTGCC
8mer-w6	4mer-m13.16	TTTT	right	Context_7	TCTACAGTCCGACGATCAAGTGGAGTTACCTAGGGTGCCAGGACTTCCCCTTCTTAGAAGAGTTAAATGGACCTTTTTGATCTCTTCTGATACACCCTAGGGTTTAGACAAAAATTTTTCTGCCTCATGATTTCCCTCTTGCAACAATGCTATGGCTTTGTAAAGGGTACCAATGCCCTGGCTCTGCC
8mer-w6	4mer-m13.16	TTTT	dual	Context_7	TCTACAGTCCGACGATCAAGTGGAGTTACCTAGGGTGCCAGGACTTCCCCTTCTTAGAAGACAAAAATTTTTCTGCCTCATTGATCTCTTCTGATACACCCTAGGGTTTAGACAAAAATTTTTCTGCCTCATGATTTCCCTCTTGCAACAATGCTATGGCTTTGTAAAGGGTACCAATGCCCTGGCTC
8mer-w6	9mer-m11.19		left	Context_7	TCTACAGTCCGACGATCAAGTGGAGTTACCTAGGGTGCCAGGACTTCCCCTTCTTAGTATACAACCATCTGCCTCATTGATCTCTTCTGATACACCCTAGGGTTTAGTATGAAATGCCAGGGTTGATTTCCCTCTTGCAACAATGCTATGGCTTTGTAAAGGGTACCAATGCCCTGGCTCTGCCCTGG
8mer-w6	9mer-m11.19		right	Context_7	TCTACAGTCCGACGATCAAGTGGAGTTACCTAGGGTGCCAGGACTTCCCCTTCTTAGAAGAGTTAAATGGACCTTTTTGATCTCTTCTGATACACCCTAGGGTTTATACAACCATCTGCCTCATGATTTCCCTCTTGCAACAATGCTATGGCTTTGTAAAGGGTACCAATGCCCTGGCTCTGCCCTGG
8mer-w6	9mer-m11.19		dual	Context_7	TCTACAGTCCGACGATCAAGTGGAGTTACCTAGGGTGCCAGGACTTCCCCTTCTTAGTATACAACCATCTGCCTCATTGATCTCTTCTGATACACCCTAGGGTTTATACAACCATCTGCCTCATGATTTCCCTCTTGCAACAATGCTATGGCTTTGTAAAGGGTACCAATGCCCTGGCTCTGCCCTGG
8mer-w6	9mer-m11.19	A	left	Context_7	TCTACAGTCCGACGATCAAGTGGAGTTACCTAGGGTGCCAGGACTTCCCCTTCTTAGTATACAACCAATCTGCCTCATTGATCTCTTCTGATACACCCTAGGGTTTAGTATGAAATGCCAGGGTTGATTTCCCTCTTGCAACAATGCTATGGCTTTGTAAAGGGTACCAATGCCCTGGCTCTGCCCTG
8mer-w6	9mer-m11.19	A	right	Context_7	TCTACAGTCCGACGATCAAGTGGAGTTACCTAGGGTGCCAGGACTTCCCCTTCTTAGAAGAGTTAAATGGACCTTTTTGATCTCTTCTGATACACCCTAGGGTTTATACAACCAATCTGCCTCATGATTTCCCTCTTGCAACAATGCTATGGCTTTGTAAAGGGTACCAATGCCCTGGCTCTGCCCTG
8mer-w6	9mer-m11.19	A	dual	Context_7	TCTACAGTCCGACGATCAAGTGGAGTTACCTAGGGTGCCAGGACTTCCCCTTCTTAGTATACAACCAATCTGCCTCATTGATCTCTTCTGATACACCCTAGGGTTTATACAACCAATCTGCCTCATGATTTCCCTCTTGCAACAATGCTATGGCTTTGTAAAGGGTACCAATGCCCTGGCTCTGCCCT
8mer-w6	9mer-m11.19	AAAA	left	Context_7	TCTACAGTCCGACGATCAAGTGGAGTTACCTAGGGTGCCAGGACTTCCCCTTCTTAGTATACAACCAAAAATCTGCCTCATTGATCTCTTCTGATACACCCTAGGGTTTAGTATGAAATGCCAGGGTTGATTTCCCTCTTGCAACAATGCTATGGCTTTGTAAAGGGTACCAATGCCCTGGCTCTGCC
8mer-w6	9mer-m11.19	AAAA	right	Context_7	TCTACAGTCCGACGATCAAGTGGAGTTACCTAGGGTGCCAGGACTTCCCCTTCTTAGAAGAGTTAAATGGACCTTTTTGATCTCTTCTGATACACCCTAGGGTTTATACAACCAAAAATCTGCCTCATGATTTCCCTCTTGCAACAATGCTATGGCTTTGTAAAGGGTACCAATGCCCTGGCTCTGCC
8mer-w6	9mer-m11.19	AAAA	dual	Context_7	TCTACAGTCCGACGATCAAGTGGAGTTACCTAGGGTGCCAGGACTTCCCCTTCTTAGTATACAACCAAAAATCTGCCTCATTGATCTCTTCTGATACACCCTAGGGTTTATACAACCAAAAATCTGCCTCATGATTTCCCTCTTGCAACAATGCTATGGCTTTGTAAAGGGTACCAATGCCCTGGCTC
8mer-w6	9mer-m11.19	T	left	Context_7	TCTACAGTCCGACGATCAAGTGGAGTTACCTAGGGTGCCAGGACTTCCCCTTCTTAGTATACAACCATTCTGCCTCATTGATCTCTTCTGATACACCCTAGGGTTTAGTATGAAATGCCAGGGTTGATTTCCCTCTTGCAACAATGCTATGGCTTTGTAAAGGGTACCAATGCCCTGGCTCTGCCCTG
8mer-w6	9mer-m11.19	T	right	Context_7	TCTACAGTCCGACGATCAAGTGGAGTTACCTAGGGTGCCAGGACTTCCCCTTCTTAGAAGAGTTAAATGGACCTTTTTGATCTCTTCTGATACACCCTAGGGTTTATACAACCATTCTGCCTCATGATTTCCCTCTTGCAACAATGCTATGGCTTTGTAAAGGGTACCAATGCCCTGGCTCTGCCCTG
8mer-w6	9mer-m11.19	T	dual	Context_7	TCTACAGTCCGACGATCAAGTGGAGTTACCTAGGGTGCCAGGACTTCCCCTTCTTAGTATACAACCATTCTGCCTCATTGATCTCTTCTGATACACCCTAGGGTTTATACAACCATTCTGCCTCATGATTTCCCTCTTGCAACAATGCTATGGCTTTGTAAAGGGTACCAATGCCCTGGCTCTGCCCT
8mer-w6	9mer-m11.19	TTTT	left	Context_7	TCTACAGTCCGACGATCAAGTGGAGTTACCTAGGGTGCCAGGACTTCCCCTTCTTAGTATACAACCATTTTTCTGCCTCATTGATCTCTTCTGATACACCCTAGGGTTTAGTATGAAATGCCAGGGTTGATTTCCCTCTTGCAACAATGCTATGGCTTTGTAAAGGGTACCAATGCCCTGGCTCTGCC
8mer-w6	9mer-m11.19	TTTT	right	Context_7	TCTACAGTCCGACGATCAAGTGGAGTTACCTAGGGTGCCAGGACTTCCCCTTCTTAGAAGAGTTAAATGGACCTTTTTGATCTCTTCTGATACACCCTAGGGTTTATACAACCATTTTTCTGCCTCATGATTTCCCTCTTGCAACAATGCTATGGCTTTGTAAAGGGTACCAATGCCCTGGCTCTGCC
8mer-w6	9mer-m11.19	TTTT	dual	Context_7	TCTACAGTCCGACGATCAAGTGGAGTTACCTAGGGTGCCAGGACTTCCCCTTCTTAGTATACAACCATTTTTCTGCCTCATTGATCTCTTCTGATACACCCTAGGGTTTATACAACCATTTTTCTGCCTCATGATTTCCCTCTTGCAACAATGCTATGGCTTTGTAAAGGGTACCAATGCCCTGGCTC
8mer-w6	9mer-m13.21		left	Context_7	TCTACAGTCCGACGATCAAGTGGAGTTACCTAGGGTGCCAGGACTTCCCCTTCTTACTATACAAAAATCTGCCTCATTGATCTCTTCTGATACACCCTAGGGTTTAGTATGAAATGCCAGGGTTGATTTCCCTCTTGCAACAATGCTATGGCTTTGTAAAGGGTACCAATGCCCTGGCTCTGCCCTGG
8mer-w6	9mer-m13.21		right	Context_7	TCTACAGTCCGACGATCAAGTGGAGTTACCTAGGGTGCCAGGACTTCCCCTTCTTAGAAGAGTTAAATGGACCTTTTTGATCTCTTCTGATACACCCTAGGGACTATACAAAAATCTGCCTCATGATTTCCCTCTTGCAACAATGCTATGGCTTTGTAAAGGGTACCAATGCCCTGGCTCTGCCCTGG
8mer-w6	9mer-m13.21		dual	Context_7	TCTACAGTCCGACGATCAAGTGGAGTTACCTAGGGTGCCAGGACTTCCCCTTCTTACTATACAAAAATCTGCCTCATTGATCTCTTCTGATACACCCTAGGGACTATACAAAAATCTGCCTCATGATTTCCCTCTTGCAACAATGCTATGGCTTTGTAAAGGGTACCAATGCCCTGGCTCTGCCCTGG
8mer-w6	9mer-m13.21	A	left	Context_7	TCTACAGTCCGACGATCAAGTGGAGTTACCTAGGGTGCCAGGACTTCCCCTTCTTACTATACAAAAAATCTGCCTCATTGATCTCTTCTGATACACCCTAGGGTTTAGTATGAAATGCCAGGGTTGATTTCCCTCTTGCAACAATGCTATGGCTTTGTAAAGGGTACCAATGCCCTGGCTCTGCCCTG
8mer-w6	9mer-m13.21	A	right	Context_7	TCTACAGTCCGACGATCAAGTGGAGTTACCTAGGGTGCCAGGACTTCCCCTTCTTAGAAGAGTTAAATGGACCTTTTTGATCTCTTCTGATACACCCTAGGGACTATACAAAAAATCTGCCTCATGATTTCCCTCTTGCAACAATGCTATGGCTTTGTAAAGGGTACCAATGCCCTGGCTCTGCCCTG
8mer-w6	9mer-m13.21	A	dual	Context_7	TCTACAGTCCGACGATCAAGTGGAGTTACCTAGGGTGCCAGGACTTCCCCTTCTTACTATACAAAAAATCTGCCTCATTGATCTCTTCTGATACACCCTAGGGACTATACAAAAAATCTGCCTCATGATTTCCCTCTTGCAACAATGCTATGGCTTTGTAAAGGGTACCAATGCCCTGGCTCTGCCCT
8mer-w6	9mer-m13.21	AAAA	left	Context_7	TCTACAGTCCGACGATCAAGTGGAGTTACCTAGGGTGCCAGGACTTCCCCTTCTTACTATACAAAAAAAAATCTGCCTCATTGATCTCTTCTGATACACCCTAGGGTTTAGTATGAAATGCCAGGGTTGATTTCCCTCTTGCAACAATGCTATGGCTTTGTAAAGGGTACCAATGCCCTGGCTCTGCC
8mer-w6	9mer-m13.21	AAAA	right	Context_7	TCTACAGTCCGACGATCAAGTGGAGTTACCTAGGGTGCCAGGACTTCCCCTTCTTAGAAGAGTTAAATGGACCTTTTTGATCTCTTCTGATACACCCTAGGGACTATACAAAAAAAAATCTGCCTCATGATTTCCCTCTTGCAACAATGCTATGGCTTTGTAAAGGGTACCAATGCCCTGGCTCTGCC
8mer-w6	9mer-m13.21	AAAA	dual	Context_7	TCTACAGTCCGACGATCAAGTGGAGTTACCTAGGGTGCCAGGACTTCCCCTTCTTACTATACAAAAAAAAATCTGCCTCATTGATCTCTTCTGATACACCCTAGGGACTATACAAAAAAAAATCTGCCTCATGATTTCCCTCTTGCAACAATGCTATGGCTTTGTAAAGGGTACCAATGCCCTGGCTC
8mer-w6	9mer-m13.21	T	left	Context_7	TCTACAGTCCGACGATCAAGTGGAGTTACCTAGGGTGCCAGGACTTCCCCTTCTTACTATACAAAAATTCTGCCTCATTGATCTCTTCTGATACACCCTAGGGTTTAGTATGAAATGCCAGGGTTGATTTCCCTCTTGCAACAATGCTATGGCTTTGTAAAGGGTACCAATGCCCTGGCTCTGCCCTG
8mer-w6	9mer-m13.21	T	right	Context_7	TCTACAGTCCGACGATCAAGTGGAGTTACCTAGGGTGCCAGGACTTCCCCTTCTTAGAAGAGTTAAATGGACCTTTTTGATCTCTTCTGATACACCCTAGGGACTATACAAAAATTCTGCCTCATGATTTCCCTCTTGCAACAATGCTATGGCTTTGTAAAGGGTACCAATGCCCTGGCTCTGCCCTG
8mer-w6	9mer-m13.21	T	dual	Context_7	TCTACAGTCCGACGATCAAGTGGAGTTACCTAGGGTGCCAGGACTTCCCCTTCTTACTATACAAAAATTCTGCCTCATTGATCTCTTCTGATACACCCTAGGGACTATACAAAAATTCTGCCTCATGATTTCCCTCTTGCAACAATGCTATGGCTTTGTAAAGGGTACCAATGCCCTGGCTCTGCCCT
8mer-w6	9mer-m13.21	TTTT	left	Context_7	TCTACAGTCCGACGATCAAGTGGAGTTACCTAGGGTGCCAGGACTTCCCCTTCTTACTATACAAAAATTTTTCTGCCTCATTGATCTCTTCTGATACACCCTAGGGTTTAGTATGAAATGCCAGGGTTGATTTCCCTCTTGCAACAATGCTATGGCTTTGTAAAGGGTACCAATGCCCTGGCTCTGCC
8mer-w6	9mer-m13.21	TTTT	right	Context_7	TCTACAGTCCGACGATCAAGTGGAGTTACCTAGGGTGCCAGGACTTCCCCTTCTTAGAAGAGTTAAATGGACCTTTTTGATCTCTTCTGATACACCCTAGGGACTATACAAAAATTTTTCTGCCTCATGATTTCCCTCTTGCAACAATGCTATGGCTTTGTAAAGGGTACCAATGCCCTGGCTCTGCC
8mer-w6	9mer-m13.21	TTTT	dual	Context_7	TCTACAGTCCGACGATCAAGTGGAGTTACCTAGGGTGCCAGGACTTCCCCTTCTTACTATACAAAAATTTTTCTGCCTCATTGATCTCTTCTGATACACCCTAGGGACTATACAAAAATTTTTCTGCCTCATGATTTCCCTCTTGCAACAATGCTATGGCTTTGTAAAGGGTACCAATGCCCTGGCTC
No_site_0				Context_7	TCTACAGTCCGACGATCAAGTGGAGTTACCTAGGGTGCCAGGACTTCCCCTTCTTAGAAGAGTTAAATGGACCTTTTTGATCTCTTCTGATACACCCTAGGGTTTAGTATGAAATGCCAGGGTTGATTTCCCTCTTGCAACAATGCTATGGCTTTGTAAAGGGTACCAATGCCCTGGCTCTGCCCTGG
No_site_1				Context_7	TCTACAGTCCGACGATCAAGTGGAGTTACCTAGGGTGCCAGGACTTCCCCTTCTTATTTCCAATAATTGGCACTTATTGATCTCTTCTGATACACCCTAGGGTCACATAAAGAGGACAGGGCCTGATTTCCCTCTTGCAACAATGCTATGGCTTTGTAAAGGGTACCAATGCCCTGGCTCTGCCCTGG
No_site_2				Context_7	TCTACAGTCCGACGATCAAGTGGAGTTACCTAGGGTGCCAGGACTTCCCCTTCTTAAAAGGCCATAAAGCGCATTATTGATCTCTTCTGATACACCCTAGGGTTTTTTGACCATTTATCCCCCTGATTTCCCTCTTGCAACAATGCTATGGCTTTGTAAAGGGTACCAATGCCCTGGCTCTGCCCTGG
No_site_3				Context_7	TCTACAGTCCGACGATCAAGTGGAGTTACCTAGGGTGCCAGGACTTCCCCTTCTTATTCCCTGATATTTAAGTAGTTTGATCTCTTCTGATACACCCTAGGGTGAAAGATCTCATGCCTTGGTTGATTTCCCTCTTGCAACAATGCTATGGCTTTGTAAAGGGTACCAATGCCCTGGCTCTGCCCTGG
No_site_4				Context_7	TCTACAGTCCGACGATCAAGTGGAGTTACCTAGGGTGCCAGGACTTCCCCTTCTTAGGTTGCCTTAAAAAAAAGAATTGATCTCTTCTGATACACCCTAGGGTTGTGTCTTTGGTTAACTTGCTGATTTCCCTCTTGCAACAATGCTATGGCTTTGTAAAGGGTACCAATGCCCTGGCTCTGCCCTGG
No_site_5				Context_7	TCTACAGTCCGACGATCAAGTGGAGTTACCTAGGGTGCCAGGACTTCCCCTTCTTATTGCAAGAAATATTTCAAGTTTGATCTCTTCTGATACACCCTAGGGTCCCTCTCGCAGTTTACATATTGATTTCCCTCTTGCAACAATGCTATGGCTTTGTAAAGGGTACCAATGCCCTGGCTCTGCCCTGG
No_site_6				Context_7	TCTACAGTCCGACGATCAAGTGGAGTTACCTAGGGTGCCAGGACTTCCCCTTCTTAAAGAAAAGATTTAGTCTTCCTTGATCTCTTCTGATACACCCTAGGGTTCATCAATTTATTCACTCCATGATTTCCCTCTTGCAACAATGCTATGGCTTTGTAAAGGGTACCAATGCCCTGGCTCTGCCCTGG
lin-41	9mer-m11.19	T	dual	Context_8	TCTACAGTCCGACGATCCATGGGGGTTTGTCAAAGATTGTTAGGGAGTATAGATGAATATACAACCATTCTACACTCATTAGCTTAACTGTACGGTTTGAACTTCATATACAACCATTCTGCCTCTATTAAAAAGGTGGGTTCCTAAGTTTGGGTTGTCCCTGCCATACCAATGCCCTGGCTCTGCCC
8mer			left	Context_8	TCTACAGTCCGACGATCCATGGGGGTTTGTCAAAGATTGTTAGGGAGTATAGATGAAAGGATTTGTATCTACCTCATTAGCTTAACTGTACGGTTTGAACTTCAAGAAGTGTTATTGACCTTTATTAAAAAGGTGGGTTCCTAAGTTTGGGTTGTCCCTGCCATACCAATGCCCTGGCTCTGCCCTGG
8mer			right	Context_8	TCTACAGTCCGACGATCCATGGGGGTTTGTCAAAGATTGTTAGGGAGTATAGATGAAAGGATTTGTATGCTTGTCTTTAGCTTAACTGTACGGTTTGAACTTCAAGAAGTGTTATCTACCTCAATTAAAAAGGTGGGTTCCTAAGTTTGGGTTGTCCCTGCCATACCAATGCCCTGGCTCTGCCCTGG
8mer			dual	Context_8	TCTACAGTCCGACGATCCATGGGGGTTTGTCAAAGATTGTTAGGGAGTATAGATGAAAGGATTTGTATCTACCTCATTAGCTTAACTGTACGGTTTGAACTTCAAGAAGTGTTATCTACCTCAATTAAAAAGGTGGGTTCCTAAGTTTGGGTTGTCCCTGCCATACCAATGCCCTGGCTCTGCCCTGG
7mer-m8			left	Context_8	TCTACAGTCCGACGATCCATGGGGGTTTGTCAAAGATTGTTAGGGAGTATAGATGAAAGGATTTGTATCTACCTCTTTAGCTTAACTGTACGGTTTGAACTTCAAGAAGTGTTATTGACCTTTATTAAAAAGGTGGGTTCCTAAGTTTGGGTTGTCCCTGCCATACCAATGCCCTGGCTCTGCCCTGG
7mer-m8			right	Context_8	TCTACAGTCCGACGATCCATGGGGGTTTGTCAAAGATTGTTAGGGAGTATAGATGAAAGGATTTGTATGCTTGTCTTTAGCTTAACTGTACGGTTTGAACTTCAAGAAGTGTTATCTACCTCTATTAAAAAGGTGGGTTCCTAAGTTTGGGTTGTCCCTGCCATACCAATGCCCTGGCTCTGCCCTGG
7mer-m8			dual	Context_8	TCTACAGTCCGACGATCCATGGGGGTTTGTCAAAGATTGTTAGGGAGTATAGATGAAAGGATTTGTATCTACCTCTTTAGCTTAACTGTACGGTTTGAACTTCAAGAAGTGTTATCTACCTCTATTAAAAAGGTGGGTTCCTAAGTTTGGGTTGTCCCTGCCATACCAATGCCCTGGCTCTGCCCTGG
7mer-A1			left	Context_8	TCTACAGTCCGACGATCCATGGGGGTTTGTCAAAGATTGTTAGGGAGTATAGATGAAAGGATTTGTATGTACCTCATTAGCTTAACTGTACGGTTTGAACTTCAAGAAGTGTTATTGACCTTTATTAAAAAGGTGGGTTCCTAAGTTTGGGTTGTCCCTGCCATACCAATGCCCTGGCTCTGCCCTGG
7mer-A1			right	Context_8	TCTACAGTCCGACGATCCATGGGGGTTTGTCAAAGATTGTTAGGGAGTATAGATGAAAGGATTTGTATGCTTGTCTTTAGCTTAACTGTACGGTTTGAACTTCAAGAAGTGTTATTTACCTCAATTAAAAAGGTGGGTTCCTAAGTTTGGGTTGTCCCTGCCATACCAATGCCCTGGCTCTGCCCTGG
7mer-A1			dual	Context_8	TCTACAGTCCGACGATCCATGGGGGTTTGTCAAAGATTGTTAGGGAGTATAGATGAAAGGATTTGTATGTACCTCATTAGCTTAACTGTACGGTTTGAACTTCAAGAAGTGTTATTTACCTCAATTAAAAAGGTGGGTTCCTAAGTTTGGGTTGTCCCTGCCATACCAATGCCCTGGCTCTGCCCTGG
6mer			left	Context_8	TCTACAGTCCGACGATCCATGGGGGTTTGTCAAAGATTGTTAGGGAGTATAGATGAAAGGATTTGTATGTACCTCTTTAGCTTAACTGTACGGTTTGAACTTCAAGAAGTGTTATTGACCTTTATTAAAAAGGTGGGTTCCTAAGTTTGGGTTGTCCCTGCCATACCAATGCCCTGGCTCTGCCCTGG
6mer			right	Context_8	TCTACAGTCCGACGATCCATGGGGGTTTGTCAAAGATTGTTAGGGAGTATAGATGAAAGGATTTGTATGCTTGTCTTTAGCTTAACTGTACGGTTTGAACTTCAAGAAGTGTTATTTACCTCTATTAAAAAGGTGGGTTCCTAAGTTTGGGTTGTCCCTGCCATACCAATGCCCTGGCTCTGCCCTGG
6mer			dual	Context_8	TCTACAGTCCGACGATCCATGGGGGTTTGTCAAAGATTGTTAGGGAGTATAGATGAAAGGATTTGTATGTACCTCTTTAGCTTAACTGTACGGTTTGAACTTCAAGAAGTGTTATTTACCTCTATTAAAAAGGTGGGTTCCTAAGTTTGGGTTGTCCCTGCCATACCAATGCCCTGGCTCTGCCCTGG
8mer-w6			left	Context_8	TCTACAGTCCGACGATCCATGGGGGTTTGTCAAAGATTGTTAGGGAGTATAGATGAAAGGATTTGTATCTGCCTCATTAGCTTAACTGTACGGTTTGAACTTCAAGAAGTGTTATTGACCTTTATTAAAAAGGTGGGTTCCTAAGTTTGGGTTGTCCCTGCCATACCAATGCCCTGGCTCTGCCCTGG
8mer-w6			right	Context_8	TCTACAGTCCGACGATCCATGGGGGTTTGTCAAAGATTGTTAGGGAGTATAGATGAAAGGATTTGTATGCTTGTCTTTAGCTTAACTGTACGGTTTGAACTTCAAGAAGTGTTATCTGCCTCAATTAAAAAGGTGGGTTCCTAAGTTTGGGTTGTCCCTGCCATACCAATGCCCTGGCTCTGCCCTGG
8mer-w6			dual	Context_8	TCTACAGTCCGACGATCCATGGGGGTTTGTCAAAGATTGTTAGGGAGTATAGATGAAAGGATTTGTATCTGCCTCATTAGCTTAACTGTACGGTTTGAACTTCAAGAAGTGTTATCTGCCTCAATTAAAAAGGTGGGTTCCTAAGTTTGGGTTGTCCCTGCCATACCAATGCCCTGGCTCTGCCCTGG
8mer-w6	4mer-m13.16		left	Context_8	TCTACAGTCCGACGATCCATGGGGGTTTGTCAAAGATTGTTAGGGAGTATAGATGAAAGGACAAGTATCTGCCTCATTAGCTTAACTGTACGGTTTGAACTTCAAGAAGTGTTATTGACCTTTATTAAAAAGGTGGGTTCCTAAGTTTGGGTTGTCCCTGCCATACCAATGCCCTGGCTCTGCCCTGG
8mer-w6	4mer-m13.16		right	Context_8	TCTACAGTCCGACGATCCATGGGGGTTTGTCAAAGATTGTTAGGGAGTATAGATGAAAGGATTTGTATGCTTGTCTTTAGCTTAACTGTACGGTTTGAACTTCAAGAACAATTATCTGCCTCAATTAAAAAGGTGGGTTCCTAAGTTTGGGTTGTCCCTGCCATACCAATGCCCTGGCTCTGCCCTGG
8mer-w6	4mer-m13.16		dual	Context_8	TCTACAGTCCGACGATCCATGGGGGTTTGTCAAAGATTGTTAGGGAGTATAGATGAAAGGACAAGTATCTGCCTCATTAGCTTAACTGTACGGTTTGAACTTCAAGAACAATTATCTGCCTCAATTAAAAAGGTGGGTTCCTAAGTTTGGGTTGTCCCTGCCATACCAATGCCCTGGCTCTGCCCTGG
8mer-w6	4mer-m13.16	A	left	Context_8	TCTACAGTCCGACGATCCATGGGGGTTTGTCAAAGATTGTTAGGGAGTATAGATGAAAGGACAAGTAATCTGCCTCATTAGCTTAACTGTACGGTTTGAACTTCAAGAAGTGTTATTGACCTTTATTAAAAAGGTGGGTTCCTAAGTTTGGGTTGTCCCTGCCATACCAATGCCCTGGCTCTGCCCTG
8mer-w6	4mer-m13.16	A	right	Context_8	TCTACAGTCCGACGATCCATGGGGGTTTGTCAAAGATTGTTAGGGAGTATAGATGAAAGGATTTGTATGCTTGTCTTTAGCTTAACTGTACGGTTTGAACTTCAAGAACAATTAATCTGCCTCAATTAAAAAGGTGGGTTCCTAAGTTTGGGTTGTCCCTGCCATACCAATGCCCTGGCTCTGCCCTG
8mer-w6	4mer-m13.16	A	dual	Context_8	TCTACAGTCCGACGATCCATGGGGGTTTGTCAAAGATTGTTAGGGAGTATAGATGAAAGGACAAGTAATCTGCCTCATTAGCTTAACTGTACGGTTTGAACTTCAAGAACAATTAATCTGCCTCAATTAAAAAGGTGGGTTCCTAAGTTTGGGTTGTCCCTGCCATACCAATGCCCTGGCTCTGCCCT
8mer-w6	4mer-m13.16	AAAA	left	Context_8	TCTACAGTCCGACGATCCATGGGGGTTTGTCAAAGATTGTTAGGGAGTATAGATGAAAGGACAAGTAAAAATCTGCCTCATTAGCTTAACTGTACGGTTTGAACTTCAAGAAGTGTTATTGACCTTTATTAAAAAGGTGGGTTCCTAAGTTTGGGTTGTCCCTGCCATACCAATGCCCTGGCTCTGCC
8mer-w6	4mer-m13.16	AAAA	right	Context_8	TCTACAGTCCGACGATCCATGGGGGTTTGTCAAAGATTGTTAGGGAGTATAGATGAAAGGATTTGTATGCTTGTCTTTAGCTTAACTGTACGGTTTGAACTTCAAGAACAATTAAAAATCTGCCTCAATTAAAAAGGTGGGTTCCTAAGTTTGGGTTGTCCCTGCCATACCAATGCCCTGGCTCTGCC
8mer-w6	4mer-m13.16	AAAA	dual	Context_8	TCTACAGTCCGACGATCCATGGGGGTTTGTCAAAGATTGTTAGGGAGTATAGATGAAAGGACAAGTAAAAATCTGCCTCATTAGCTTAACTGTACGGTTTGAACTTCAAGAACAATTAAAAATCTGCCTCAATTAAAAAGGTGGGTTCCTAAGTTTGGGTTGTCCCTGCCATACCAATGCCCTGGCTC
8mer-w6	4mer-m13.16	T	left	Context_8	TCTACAGTCCGACGATCCATGGGGGTTTGTCAAAGATTGTTAGGGAGTATAGATGAAAGGACAAGTATTCTGCCTCATTAGCTTAACTGTACGGTTTGAACTTCAAGAAGTGTTATTGACCTTTATTAAAAAGGTGGGTTCCTAAGTTTGGGTTGTCCCTGCCATACCAATGCCCTGGCTCTGCCCTG
8mer-w6	4mer-m13.16	T	right	Context_8	TCTACAGTCCGACGATCCATGGGGGTTTGTCAAAGATTGTTAGGGAGTATAGATGAAAGGATTTGTATGCTTGTCTTTAGCTTAACTGTACGGTTTGAACTTCAAGAACAATTATTCTGCCTCAATTAAAAAGGTGGGTTCCTAAGTTTGGGTTGTCCCTGCCATACCAATGCCCTGGCTCTGCCCTG
8mer-w6	4mer-m13.16	T	dual	Context_8	TCTACAGTCCGACGATCCATGGGGGTTTGTCAAAGATTGTTAGGGAGTATAGATGAAAGGACAAGTATTCTGCCTCATTAGCTTAACTGTACGGTTTGAACTTCAAGAACAATTATTCTGCCTCAATTAAAAAGGTGGGTTCCTAAGTTTGGGTTGTCCCTGCCATACCAATGCCCTGGCTCTGCCCT
8mer-w6	4mer-m13.16	TTTT	left	Context_8	TCTACAGTCCGACGATCCATGGGGGTTTGTCAAAGATTGTTAGGGAGTATAGATGAAAGGACAAGTATTTTTCTGCCTCATTAGCTTAACTGTACGGTTTGAACTTCAAGAAGTGTTATTGACCTTTATTAAAAAGGTGGGTTCCTAAGTTTGGGTTGTCCCTGCCATACCAATGCCCTGGCTCTGCC
8mer-w6	4mer-m13.16	TTTT	right	Context_8	TCTACAGTCCGACGATCCATGGGGGTTTGTCAAAGATTGTTAGGGAGTATAGATGAAAGGATTTGTATGCTTGTCTTTAGCTTAACTGTACGGTTTGAACTTCAAGAACAATTATTTTTCTGCCTCAATTAAAAAGGTGGGTTCCTAAGTTTGGGTTGTCCCTGCCATACCAATGCCCTGGCTCTGCC
8mer-w6	4mer-m13.16	TTTT	dual	Context_8	TCTACAGTCCGACGATCCATGGGGGTTTGTCAAAGATTGTTAGGGAGTATAGATGAAAGGACAAGTATTTTTCTGCCTCATTAGCTTAACTGTACGGTTTGAACTTCAAGAACAATTATTTTTCTGCCTCAATTAAAAAGGTGGGTTCCTAAGTTTGGGTTGTCCCTGCCATACCAATGCCCTGGCTC
8mer-w6	9mer-m11.19		left	Context_8	TCTACAGTCCGACGATCCATGGGGGTTTGTCAAAGATTGTTAGGGAGTATAGATGAATATACAACCATCTGCCTCATTAGCTTAACTGTACGGTTTGAACTTCAAGAAGTGTTATTGACCTTTATTAAAAAGGTGGGTTCCTAAGTTTGGGTTGTCCCTGCCATACCAATGCCCTGGCTCTGCCCTGG
8mer-w6	9mer-m11.19		right	Context_8	TCTACAGTCCGACGATCCATGGGGGTTTGTCAAAGATTGTTAGGGAGTATAGATGAAAGGATTTGTATGCTTGTCTTTAGCTTAACTGTACGGTTTGAACTTCATATACAACCATCTGCCTCAATTAAAAAGGTGGGTTCCTAAGTTTGGGTTGTCCCTGCCATACCAATGCCCTGGCTCTGCCCTGG
8mer-w6	9mer-m11.19		dual	Context_8	TCTACAGTCCGACGATCCATGGGGGTTTGTCAAAGATTGTTAGGGAGTATAGATGAATATACAACCATCTGCCTCATTAGCTTAACTGTACGGTTTGAACTTCATATACAACCATCTGCCTCAATTAAAAAGGTGGGTTCCTAAGTTTGGGTTGTCCCTGCCATACCAATGCCCTGGCTCTGCCCTGG
8mer-w6	9mer-m11.19	A	left	Context_8	TCTACAGTCCGACGATCCATGGGGGTTTGTCAAAGATTGTTAGGGAGTATAGATGAATATACAACCAATCTGCCTCATTAGCTTAACTGTACGGTTTGAACTTCAAGAAGTGTTATTGACCTTTATTAAAAAGGTGGGTTCCTAAGTTTGGGTTGTCCCTGCCATACCAATGCCCTGGCTCTGCCCTG
8mer-w6	9mer-m11.19	A	right	Context_8	TCTACAGTCCGACGATCCATGGGGGTTTGTCAAAGATTGTTAGGGAGTATAGATGAAAGGATTTGTATGCTTGTCTTTAGCTTAACTGTACGGTTTGAACTTCATATACAACCAATCTGCCTCAATTAAAAAGGTGGGTTCCTAAGTTTGGGTTGTCCCTGCCATACCAATGCCCTGGCTCTGCCCTG
8mer-w6	9mer-m11.19	A	dual	Context_8	TCTACAGTCCGACGATCCATGGGGGTTTGTCAAAGATTGTTAGGGAGTATAGATGAATATACAACCAATCTGCCTCATTAGCTTAACTGTACGGTTTGAACTTCATATACAACCAATCTGCCTCAATTAAAAAGGTGGGTTCCTAAGTTTGGGTTGTCCCTGCCATACCAATGCCCTGGCTCTGCCCT
8mer-w6	9mer-m11.19	AAAA	left	Context_8	TCTACAGTCCGACGATCCATGGGGGTTTGTCAAAGATTGTTAGGGAGTATAGATGAATATACAACCAAAAATCTGCCTCATTAGCTTAACTGTACGGTTTGAACTTCAAGAAGTGTTATTGACCTTTATTAAAAAGGTGGGTTCCTAAGTTTGGGTTGTCCCTGCCATACCAATGCCCTGGCTCTGCC
8mer-w6	9mer-m11.19	AAAA	right	Context_8	TCTACAGTCCGACGATCCATGGGGGTTTGTCAAAGATTGTTAGGGAGTATAGATGAAAGGATTTGTATGCTTGTCTTTAGCTTAACTGTACGGTTTGAACTTCATATACAACCAAAAATCTGCCTCAATTAAAAAGGTGGGTTCCTAAGTTTGGGTTGTCCCTGCCATACCAATGCCCTGGCTCTGCC
8mer-w6	9mer-m11.19	AAAA	dual	Context_8	TCTACAGTCCGACGATCCATGGGGGTTTGTCAAAGATTGTTAGGGAGTATAGATGAATATACAACCAAAAATCTGCCTCATTAGCTTAACTGTACGGTTTGAACTTCATATACAACCAAAAATCTGCCTCAATTAAAAAGGTGGGTTCCTAAGTTTGGGTTGTCCCTGCCATACCAATGCCCTGGCTC
8mer-w6	9mer-m11.19	T	left	Context_8	TCTACAGTCCGACGATCCATGGGGGTTTGTCAAAGATTGTTAGGGAGTATAGATGAATATACAACCATTCTGCCTCATTAGCTTAACTGTACGGTTTGAACTTCAAGAAGTGTTATTGACCTTTATTAAAAAGGTGGGTTCCTAAGTTTGGGTTGTCCCTGCCATACCAATGCCCTGGCTCTGCCCTG
8mer-w6	9mer-m11.19	T	right	Context_8	TCTACAGTCCGACGATCCATGGGGGTTTGTCAAAGATTGTTAGGGAGTATAGATGAAAGGATTTGTATGCTTGTCTTTAGCTTAACTGTACGGTTTGAACTTCATATACAACCATTCTGCCTCAATTAAAAAGGTGGGTTCCTAAGTTTGGGTTGTCCCTGCCATACCAATGCCCTGGCTCTGCCCTG
8mer-w6	9mer-m11.19	T	dual	Context_8	TCTACAGTCCGACGATCCATGGGGGTTTGTCAAAGATTGTTAGGGAGTATAGATGAATATACAACCATTCTGCCTCATTAGCTTAACTGTACGGTTTGAACTTCATATACAACCATTCTGCCTCAATTAAAAAGGTGGGTTCCTAAGTTTGGGTTGTCCCTGCCATACCAATGCCCTGGCTCTGCCCT
8mer-w6	9mer-m11.19	TTTT	left	Context_8	TCTACAGTCCGACGATCCATGGGGGTTTGTCAAAGATTGTTAGGGAGTATAGATGAATATACAACCATTTTTCTGCCTCATTAGCTTAACTGTACGGTTTGAACTTCAAGAAGTGTTATTGACCTTTATTAAAAAGGTGGGTTCCTAAGTTTGGGTTGTCCCTGCCATACCAATGCCCTGGCTCTGCC
8mer-w6	9mer-m11.19	TTTT	right	Context_8	TCTACAGTCCGACGATCCATGGGGGTTTGTCAAAGATTGTTAGGGAGTATAGATGAAAGGATTTGTATGCTTGTCTTTAGCTTAACTGTACGGTTTGAACTTCATATACAACCATTTTTCTGCCTCAATTAAAAAGGTGGGTTCCTAAGTTTGGGTTGTCCCTGCCATACCAATGCCCTGGCTCTGCC
8mer-w6	9mer-m11.19	TTTT	dual	Context_8	TCTACAGTCCGACGATCCATGGGGGTTTGTCAAAGATTGTTAGGGAGTATAGATGAATATACAACCATTTTTCTGCCTCATTAGCTTAACTGTACGGTTTGAACTTCATATACAACCATTTTTCTGCCTCAATTAAAAAGGTGGGTTCCTAAGTTTGGGTTGTCCCTGCCATACCAATGCCCTGGCTC
8mer-w6	9mer-m13.21		left	Context_8	TCTACAGTCCGACGATCCATGGGGGTTTGTCAAAGATTGTTAGGGAGTATAGATGACTATACAAGTATCTGCCTCATTAGCTTAACTGTACGGTTTGAACTTCAAGAAGTGTTATTGACCTTTATTAAAAAGGTGGGTTCCTAAGTTTGGGTTGTCCCTGCCATACCAATGCCCTGGCTCTGCCCTGG
8mer-w6	9mer-m13.21		right	Context_8	TCTACAGTCCGACGATCCATGGGGGTTTGTCAAAGATTGTTAGGGAGTATAGATGAAAGGATTTGTATGCTTGTCTTTAGCTTAACTGTACGGTTTGAACTTACTATACAATTATCTGCCTCAATTAAAAAGGTGGGTTCCTAAGTTTGGGTTGTCCCTGCCATACCAATGCCCTGGCTCTGCCCTGG
8mer-w6	9mer-m13.21		dual	Context_8	TCTACAGTCCGACGATCCATGGGGGTTTGTCAAAGATTGTTAGGGAGTATAGATGACTATACAAGTATCTGCCTCATTAGCTTAACTGTACGGTTTGAACTTACTATACAATTATCTGCCTCAATTAAAAAGGTGGGTTCCTAAGTTTGGGTTGTCCCTGCCATACCAATGCCCTGGCTCTGCCCTGG
8mer-w6	9mer-m13.21	A	left	Context_8	TCTACAGTCCGACGATCCATGGGGGTTTGTCAAAGATTGTTAGGGAGTATAGATGACTATACAAGTAATCTGCCTCATTAGCTTAACTGTACGGTTTGAACTTCAAGAAGTGTTATTGACCTTTATTAAAAAGGTGGGTTCCTAAGTTTGGGTTGTCCCTGCCATACCAATGCCCTGGCTCTGCCCTG
8mer-w6	9mer-m13.21	A	right	Context_8	TCTACAGTCCGACGATCCATGGGGGTTTGTCAAAGATTGTTAGGGAGTATAGATGAAAGGATTTGTATGCTTGTCTTTAGCTTAACTGTACGGTTTGAACTTACTATACAATTAATCTGCCTCAATTAAAAAGGTGGGTTCCTAAGTTTGGGTTGTCCCTGCCATACCAATGCCCTGGCTCTGCCCTG
8mer-w6	9mer-m13.21	A	dual	Context_8	TCTACAGTCCGACGATCCATGGGGGTTTGTCAAAGATTGTTAGGGAGTATAGATGACTATACAAGTAATCTGCCTCATTAGCTTAACTGTACGGTTTGAACTTACTATACAATTAATCTGCCTCAATTAAAAAGGTGGGTTCCTAAGTTTGGGTTGTCCCTGCCATACCAATGCCCTGGCTCTGCCCT
8mer-w6	9mer-m13.21	AAAA	left	Context_8	TCTACAGTCCGACGATCCATGGGGGTTTGTCAAAGATTGTTAGGGAGTATAGATGACTATACAAGTAAAAATCTGCCTCATTAGCTTAACTGTACGGTTTGAACTTCAAGAAGTGTTATTGACCTTTATTAAAAAGGTGGGTTCCTAAGTTTGGGTTGTCCCTGCCATACCAATGCCCTGGCTCTGCC
8mer-w6	9mer-m13.21	AAAA	right	Context_8	TCTACAGTCCGACGATCCATGGGGGTTTGTCAAAGATTGTTAGGGAGTATAGATGAAAGGATTTGTATGCTTGTCTTTAGCTTAACTGTACGGTTTGAACTTACTATACAATTAAAAATCTGCCTCAATTAAAAAGGTGGGTTCCTAAGTTTGGGTTGTCCCTGCCATACCAATGCCCTGGCTCTGCC
8mer-w6	9mer-m13.21	AAAA	dual	Context_8	TCTACAGTCCGACGATCCATGGGGGTTTGTCAAAGATTGTTAGGGAGTATAGATGACTATACAAGTAAAAATCTGCCTCATTAGCTTAACTGTACGGTTTGAACTTACTATACAATTAAAAATCTGCCTCAATTAAAAAGGTGGGTTCCTAAGTTTGGGTTGTCCCTGCCATACCAATGCCCTGGCTC
8mer-w6	9mer-m13.21	T	left	Context_8	TCTACAGTCCGACGATCCATGGGGGTTTGTCAAAGATTGTTAGGGAGTATAGATGACTATACAAGTATTCTGCCTCATTAGCTTAACTGTACGGTTTGAACTTCAAGAAGTGTTATTGACCTTTATTAAAAAGGTGGGTTCCTAAGTTTGGGTTGTCCCTGCCATACCAATGCCCTGGCTCTGCCCTG
8mer-w6	9mer-m13.21	T	right	Context_8	TCTACAGTCCGACGATCCATGGGGGTTTGTCAAAGATTGTTAGGGAGTATAGATGAAAGGATTTGTATGCTTGTCTTTAGCTTAACTGTACGGTTTGAACTTACTATACAATTATTCTGCCTCAATTAAAAAGGTGGGTTCCTAAGTTTGGGTTGTCCCTGCCATACCAATGCCCTGGCTCTGCCCTG
8mer-w6	9mer-m13.21	T	dual	Context_8	TCTACAGTCCGACGATCCATGGGGGTTTGTCAAAGATTGTTAGGGAGTATAGATGACTATACAAGTATTCTGCCTCATTAGCTTAACTGTACGGTTTGAACTTACTATACAATTATTCTGCCTCAATTAAAAAGGTGGGTTCCTAAGTTTGGGTTGTCCCTGCCATACCAATGCCCTGGCTCTGCCCT
8mer-w6	9mer-m13.21	TTTT	left	Context_8	TCTACAGTCCGACGATCCATGGGGGTTTGTCAAAGATTGTTAGGGAGTATAGATGACTATACAAGTATTTTTCTGCCTCATTAGCTTAACTGTACGGTTTGAACTTCAAGAAGTGTTATTGACCTTTATTAAAAAGGTGGGTTCCTAAGTTTGGGTTGTCCCTGCCATACCAATGCCCTGGCTCTGCC
8mer-w6	9mer-m13.21	TTTT	right	Context_8	TCTACAGTCCGACGATCCATGGGGGTTTGTCAAAGATTGTTAGGGAGTATAGATGAAAGGATTTGTATGCTTGTCTTTAGCTTAACTGTACGGTTTGAACTTACTATACAATTATTTTTCTGCCTCAATTAAAAAGGTGGGTTCCTAAGTTTGGGTTGTCCCTGCCATACCAATGCCCTGGCTCTGCC
8mer-w6	9mer-m13.21	TTTT	dual	Context_8	TCTACAGTCCGACGATCCATGGGGGTTTGTCAAAGATTGTTAGGGAGTATAGATGACTATACAAGTATTTTTCTGCCTCATTAGCTTAACTGTACGGTTTGAACTTACTATACAATTATTTTTCTGCCTCAATTAAAAAGGTGGGTTCCTAAGTTTGGGTTGTCCCTGCCATACCAATGCCCTGGCTC
No_site_0				Context_8	TCTACAGTCCGACGATCCATGGGGGTTTGTCAAAGATTGTTAGGGAGTATAGATGAAAGGATTTGTATGCTTGTCTTTAGCTTAACTGTACGGTTTGAACTTCAAGAAGTGTTATTGACCTTTATTAAAAAGGTGGGTTCCTAAGTTTGGGTTGTCCCTGCCATACCAATGCCCTGGCTCTGCCCTGG
No_site_1				Context_8	TCTACAGTCCGACGATCCATGGGGGTTTGTCAAAGATTGTTAGGGAGTATAGATGAACAAAAAAATTTATGTCACTTTAGCTTAACTGTACGGTTTGAACTTCCCCCCGGCTTGAACCAGAACATTAAAAAGGTGGGTTCCTAAGTTTGGGTTGTCCCTGCCATACCAATGCCCTGGCTCTGCCCTGG
No_site_2				Context_8	TCTACAGTCCGACGATCCATGGGGGTTTGTCAAAGATTGTTAGGGAGTATAGATGAAAAAGGATTTTTCTGTGTTTTTAGCTTAACTGTACGGTTTGAACTTCTTTGCTGCATGGGTTTAGAAATTAAAAAGGTGGGTTCCTAAGTTTGGGTTGTCCCTGCCATACCAATGCCCTGGCTCTGCCCTGG
No_site_3				Context_8	TCTACAGTCCGACGATCCATGGGGGTTTGTCAAAGATTGTTAGGGAGTATAGATGATCAAAGTGAAATTTGAGTCATTAGCTTAACTGTACGGTTTGAACTTCTTATGTGGTTGATGGGGCTGATTAAAAAGGTGGGTTCCTAAGTTTGGGTTGTCCCTGCCATACCAATGCCCTGGCTCTGCCCTGG
No_site_4				Context_8	TCTACAGTCCGACGATCCATGGGGGTTTGTCAAAGATTGTTAGGGAGTATAGATGAATAACTGCTAAATCCTAGAGTTAGCTTAACTGTACGGTTTGAACTTCTGACTTAATCAGTTTAGTGCATTAAAAAGGTGGGTTCCTAAGTTTGGGTTGTCCCTGCCATACCAATGCCCTGGCTCTGCCCTGG
No_site_5				Context_8	TCTACAGTCCGACGATCCATGGGGGTTTGTCAAAGATTGTTAGGGAGTATAGATGATATATGCCTTTTCTTTCACCTTAGCTTAACTGTACGGTTTGAACTTCACTAAATTCCCTGATCTGGGATTAAAAAGGTGGGTTCCTAAGTTTGGGTTGTCCCTGCCATACCAATGCCCTGGCTCTGCCCTGG
No_site_6				Context_8	TCTACAGTCCGACGATCCATGGGGGTTTGTCAAAGATTGTTAGGGAGTATAGATGACATCCGCATATATCCTTACATTAGCTTAACTGTACGGTTTGAACTTCAACAGCCCTACCCATGCTTCATTAAAAAGGTGGGTTCCTAAGTTTGGGTTGTCCCTGCCATACCAATGCCCTGGCTCTGCCCTGG
lin-41	9mer-m11.19	T	dual	Context_9	TCTACAGTCCGACGATCTAAAAACTCCCTCTACTGCCTTGAAAGGTTATTCTGTTGTTATACAACCATTCTACACTCACATATGCTCAATCAGCAAGACGAGGTTTTATACAACCATTCTGCCTCTGTTTGTTTAGCGTTCCAAAGAGCTTAGCTATGGAAGTATGTACCAATGCCCTGGCTCTGCCC
8mer			left	Context_9	TCTACAGTCCGACGATCTAAAAACTCCCTCTACTGCCTTGAAAGGTTATTCTGTTGTGCGCCAAGAATCTACCTCACATATGCTCAATCAGCAAGACGAGGTTTCTCCCTTTTATTATAAGGTGTTTGTTTAGCGTTCCAAAGAGCTTAGCTATGGAAGTATGTACCAATGCCCTGGCTCTGCCCTGG
8mer			right	Context_9	TCTACAGTCCGACGATCTAAAAACTCCCTCTACTGCCTTGAAAGGTTATTCTGTTGTGCGCCAAGAATTCAATGGTCATATGCTCAATCAGCAAGACGAGGTTTCTCCCTTTTATCTACCTCAGTTTGTTTAGCGTTCCAAAGAGCTTAGCTATGGAAGTATGTACCAATGCCCTGGCTCTGCCCTGG
8mer			dual	Context_9	TCTACAGTCCGACGATCTAAAAACTCCCTCTACTGCCTTGAAAGGTTATTCTGTTGTGCGCCAAGAATCTACCTCACATATGCTCAATCAGCAAGACGAGGTTTCTCCCTTTTATCTACCTCAGTTTGTTTAGCGTTCCAAAGAGCTTAGCTATGGAAGTATGTACCAATGCCCTGGCTCTGCCCTGG
7mer-m8			left	Context_9	TCTACAGTCCGACGATCTAAAAACTCCCTCTACTGCCTTGAAAGGTTATTCTGTTGTGCGCCAAGAATCTACCTCTCATATGCTCAATCAGCAAGACGAGGTTTCTCCCTTTTATTATAAGGTGTTTGTTTAGCGTTCCAAAGAGCTTAGCTATGGAAGTATGTACCAATGCCCTGGCTCTGCCCTGG
7mer-m8			right	Context_9	TCTACAGTCCGACGATCTAAAAACTCCCTCTACTGCCTTGAAAGGTTATTCTGTTGTGCGCCAAGAATTCAATGGTCATATGCTCAATCAGCAAGACGAGGTTTCTCCCTTTTATCTACCTCTGTTTGTTTAGCGTTCCAAAGAGCTTAGCTATGGAAGTATGTACCAATGCCCTGGCTCTGCCCTGG
7mer-m8			dual	Context_9	TCTACAGTCCGACGATCTAAAAACTCCCTCTACTGCCTTGAAAGGTTATTCTGTTGTGCGCCAAGAATCTACCTCTCATATGCTCAATCAGCAAGACGAGGTTTCTCCCTTTTATCTACCTCTGTTTGTTTAGCGTTCCAAAGAGCTTAGCTATGGAAGTATGTACCAATGCCCTGGCTCTGCCCTGG
7mer-A1			left	Context_9	TCTACAGTCCGACGATCTAAAAACTCCCTCTACTGCCTTGAAAGGTTATTCTGTTGTGCGCCAAGAATTTACCTCACATATGCTCAATCAGCAAGACGAGGTTTCTCCCTTTTATTATAAGGTGTTTGTTTAGCGTTCCAAAGAGCTTAGCTATGGAAGTATGTACCAATGCCCTGGCTCTGCCCTGG
7mer-A1			right	Context_9	TCTACAGTCCGACGATCTAAAAACTCCCTCTACTGCCTTGAAAGGTTATTCTGTTGTGCGCCAAGAATTCAATGGTCATATGCTCAATCAGCAAGACGAGGTTTCTCCCTTTTATTTACCTCAGTTTGTTTAGCGTTCCAAAGAGCTTAGCTATGGAAGTATGTACCAATGCCCTGGCTCTGCCCTGG
7mer-A1			dual	Context_9	TCTACAGTCCGACGATCTAAAAACTCCCTCTACTGCCTTGAAAGGTTATTCTGTTGTGCGCCAAGAATTTACCTCACATATGCTCAATCAGCAAGACGAGGTTTCTCCCTTTTATTTACCTCAGTTTGTTTAGCGTTCCAAAGAGCTTAGCTATGGAAGTATGTACCAATGCCCTGGCTCTGCCCTGG
6mer			left	Context_9	TCTACAGTCCGACGATCTAAAAACTCCCTCTACTGCCTTGAAAGGTTATTCTGTTGTGCGCCAAGAATTTACCTCTCATATGCTCAATCAGCAAGACGAGGTTTCTCCCTTTTATTATAAGGTGTTTGTTTAGCGTTCCAAAGAGCTTAGCTATGGAAGTATGTACCAATGCCCTGGCTCTGCCCTGG
6mer			right	Context_9	TCTACAGTCCGACGATCTAAAAACTCCCTCTACTGCCTTGAAAGGTTATTCTGTTGTGCGCCAAGAATTCAATGGTCATATGCTCAATCAGCAAGACGAGGTTTCTCCCTTTTATTTACCTCTGTTTGTTTAGCGTTCCAAAGAGCTTAGCTATGGAAGTATGTACCAATGCCCTGGCTCTGCCCTGG
6mer			dual	Context_9	TCTACAGTCCGACGATCTAAAAACTCCCTCTACTGCCTTGAAAGGTTATTCTGTTGTGCGCCAAGAATTTACCTCTCATATGCTCAATCAGCAAGACGAGGTTTCTCCCTTTTATTTACCTCTGTTTGTTTAGCGTTCCAAAGAGCTTAGCTATGGAAGTATGTACCAATGCCCTGGCTCTGCCCTGG
8mer-w6			left	Context_9	TCTACAGTCCGACGATCTAAAAACTCCCTCTACTGCCTTGAAAGGTTATTCTGTTGTGCGCCAAGAATCTGCCTCACATATGCTCAATCAGCAAGACGAGGTTTCTCCCTTTTATTATAAGGTGTTTGTTTAGCGTTCCAAAGAGCTTAGCTATGGAAGTATGTACCAATGCCCTGGCTCTGCCCTGG
8mer-w6			right	Context_9	TCTACAGTCCGACGATCTAAAAACTCCCTCTACTGCCTTGAAAGGTTATTCTGTTGTGCGCCAAGAATTCAATGGTCATATGCTCAATCAGCAAGACGAGGTTTCTCCCTTTTATCTGCCTCAGTTTGTTTAGCGTTCCAAAGAGCTTAGCTATGGAAGTATGTACCAATGCCCTGGCTCTGCCCTGG
8mer-w6			dual	Context_9	TCTACAGTCCGACGATCTAAAAACTCCCTCTACTGCCTTGAAAGGTTATTCTGTTGTGCGCCAAGAATCTGCCTCACATATGCTCAATCAGCAAGACGAGGTTTCTCCCTTTTATCTGCCTCAGTTTGTTTAGCGTTCCAAAGAGCTTAGCTATGGAAGTATGTACCAATGCCCTGGCTCTGCCCTGG
8mer-w6	4mer-m13.16		left	Context_9	TCTACAGTCCGACGATCTAAAAACTCCCTCTACTGCCTTGAAAGGTTATTCTGTTGTGCGACAAGAATCTGCCTCACATATGCTCAATCAGCAAGACGAGGTTTCTCCCTTTTATTATAAGGTGTTTGTTTAGCGTTCCAAAGAGCTTAGCTATGGAAGTATGTACCAATGCCCTGGCTCTGCCCTGG
8mer-w6	4mer-m13.16		right	Context_9	TCTACAGTCCGACGATCTAAAAACTCCCTCTACTGCCTTGAAAGGTTATTCTGTTGTGCGCCAAGAATTCAATGGTCATATGCTCAATCAGCAAGACGAGGTTTCTCACAATTATCTGCCTCAGTTTGTTTAGCGTTCCAAAGAGCTTAGCTATGGAAGTATGTACCAATGCCCTGGCTCTGCCCTGG
8mer-w6	4mer-m13.16		dual	Context_9	TCTACAGTCCGACGATCTAAAAACTCCCTCTACTGCCTTGAAAGGTTATTCTGTTGTGCGACAAGAATCTGCCTCACATATGCTCAATCAGCAAGACGAGGTTTCTCACAATTATCTGCCTCAGTTTGTTTAGCGTTCCAAAGAGCTTAGCTATGGAAGTATGTACCAATGCCCTGGCTCTGCCCTGG
8mer-w6	4mer-m13.16	A	left	Context_9	TCTACAGTCCGACGATCTAAAAACTCCCTCTACTGCCTTGAAAGGTTATTCTGTTGTGCGACAAGAAATCTGCCTCACATATGCTCAATCAGCAAGACGAGGTTTCTCCCTTTTATTATAAGGTGTTTGTTTAGCGTTCCAAAGAGCTTAGCTATGGAAGTATGTACCAATGCCCTGGCTCTGCCCTG
8mer-w6	4mer-m13.16	A	right	Context_9	TCTACAGTCCGACGATCTAAAAACTCCCTCTACTGCCTTGAAAGGTTATTCTGTTGTGCGCCAAGAATTCAATGGTCATATGCTCAATCAGCAAGACGAGGTTTCTCACAATTAATCTGCCTCAGTTTGTTTAGCGTTCCAAAGAGCTTAGCTATGGAAGTATGTACCAATGCCCTGGCTCTGCCCTG
8mer-w6	4mer-m13.16	A	dual	Context_9	TCTACAGTCCGACGATCTAAAAACTCCCTCTACTGCCTTGAAAGGTTATTCTGTTGTGCGACAAGAAATCTGCCTCACATATGCTCAATCAGCAAGACGAGGTTTCTCACAATTAATCTGCCTCAGTTTGTTTAGCGTTCCAAAGAGCTTAGCTATGGAAGTATGTACCAATGCCCTGGCTCTGCCCT
8mer-w6	4mer-m13.16	AAAA	left	Context_9	TCTACAGTCCGACGATCTAAAAACTCCCTCTACTGCCTTGAAAGGTTATTCTGTTGTGCGACAAGAAAAAATCTGCCTCACATATGCTCAATCAGCAAGACGAGGTTTCTCCCTTTTATTATAAGGTGTTTGTTTAGCGTTCCAAAGAGCTTAGCTATGGAAGTATGTACCAATGCCCTGGCTCTGCC
8mer-w6	4mer-m13.16	AAAA	right	Context_9	TCTACAGTCCGACGATCTAAAAACTCCCTCTACTGCCTTGAAAGGTTATTCTGTTGTGCGCCAAGAATTCAATGGTCATATGCTCAATCAGCAAGACGAGGTTTCTCACAATTAAAAATCTGCCTCAGTTTGTTTAGCGTTCCAAAGAGCTTAGCTATGGAAGTATGTACCAATGCCCTGGCTCTGCC
8mer-w6	4mer-m13.16	AAAA	dual	Context_9	TCTACAGTCCGACGATCTAAAAACTCCCTCTACTGCCTTGAAAGGTTATTCTGTTGTGCGACAAGAAAAAATCTGCCTCACATATGCTCAATCAGCAAGACGAGGTTTCTCACAATTAAAAATCTGCCTCAGTTTGTTTAGCGTTCCAAAGAGCTTAGCTATGGAAGTATGTACCAATGCCCTGGCTC
8mer-w6	4mer-m13.16	T	left	Context_9	TCTACAGTCCGACGATCTAAAAACTCCCTCTACTGCCTTGAAAGGTTATTCTGTTGTGCGACAAGAATTCTGCCTCACATATGCTCAATCAGCAAGACGAGGTTTCTCCCTTTTATTATAAGGTGTTTGTTTAGCGTTCCAAAGAGCTTAGCTATGGAAGTATGTACCAATGCCCTGGCTCTGCCCTG
8mer-w6	4mer-m13.16	T	right	Context_9	TCTACAGTCCGACGATCTAAAAACTCCCTCTACTGCCTTGAAAGGTTATTCTGTTGTGCGCCAAGAATTCAATGGTCATATGCTCAATCAGCAAGACGAGGTTTCTCACAATTATTCTGCCTCAGTTTGTTTAGCGTTCCAAAGAGCTTAGCTATGGAAGTATGTACCAATGCCCTGGCTCTGCCCTG
8mer-w6	4mer-m13.16	T	dual	Context_9	TCTACAGTCCGACGATCTAAAAACTCCCTCTACTGCCTTGAAAGGTTATTCTGTTGTGCGACAAGAATTCTGCCTCACATATGCTCAATCAGCAAGACGAGGTTTCTCACAATTATTCTGCCTCAGTTTGTTTAGCGTTCCAAAGAGCTTAGCTATGGAAGTATGTACCAATGCCCTGGCTCTGCCCT
8mer-w6	4mer-m13.16	TTTT	left	Context_9	TCTACAGTCCGACGATCTAAAAACTCCCTCTACTGCCTTGAAAGGTTATTCTGTTGTGCGACAAGAATTTTTCTGCCTCACATATGCTCAATCAGCAAGACGAGGTTTCTCCCTTTTATTATAAGGTGTTTGTTTAGCGTTCCAAAGAGCTTAGCTATGGAAGTATGTACCAATGCCCTGGCTCTGCC
8mer-w6	4mer-m13.16	TTTT	right	Context_9	TCTACAGTCCGACGATCTAAAAACTCCCTCTACTGCCTTGAAAGGTTATTCTGTTGTGCGCCAAGAATTCAATGGTCATATGCTCAATCAGCAAGACGAGGTTTCTCACAATTATTTTTCTGCCTCAGTTTGTTTAGCGTTCCAAAGAGCTTAGCTATGGAAGTATGTACCAATGCCCTGGCTCTGCC
8mer-w6	4mer-m13.16	TTTT	dual	Context_9	TCTACAGTCCGACGATCTAAAAACTCCCTCTACTGCCTTGAAAGGTTATTCTGTTGTGCGACAAGAATTTTTCTGCCTCACATATGCTCAATCAGCAAGACGAGGTTTCTCACAATTATTTTTCTGCCTCAGTTTGTTTAGCGTTCCAAAGAGCTTAGCTATGGAAGTATGTACCAATGCCCTGGCTC
8mer-w6	9mer-m11.19		left	Context_9	TCTACAGTCCGACGATCTAAAAACTCCCTCTACTGCCTTGAAAGGTTATTCTGTTGTTATACAACCATCTGCCTCACATATGCTCAATCAGCAAGACGAGGTTTCTCCCTTTTATTATAAGGTGTTTGTTTAGCGTTCCAAAGAGCTTAGCTATGGAAGTATGTACCAATGCCCTGGCTCTGCCCTGG
8mer-w6	9mer-m11.19		right	Context_9	TCTACAGTCCGACGATCTAAAAACTCCCTCTACTGCCTTGAAAGGTTATTCTGTTGTGCGCCAAGAATTCAATGGTCATATGCTCAATCAGCAAGACGAGGTTTTATACAACCATCTGCCTCAGTTTGTTTAGCGTTCCAAAGAGCTTAGCTATGGAAGTATGTACCAATGCCCTGGCTCTGCCCTGG
8mer-w6	9mer-m11.19		dual	Context_9	TCTACAGTCCGACGATCTAAAAACTCCCTCTACTGCCTTGAAAGGTTATTCTGTTGTTATACAACCATCTGCCTCACATATGCTCAATCAGCAAGACGAGGTTTTATACAACCATCTGCCTCAGTTTGTTTAGCGTTCCAAAGAGCTTAGCTATGGAAGTATGTACCAATGCCCTGGCTCTGCCCTGG
8mer-w6	9mer-m11.19	A	left	Context_9	TCTACAGTCCGACGATCTAAAAACTCCCTCTACTGCCTTGAAAGGTTATTCTGTTGTTATACAACCAATCTGCCTCACATATGCTCAATCAGCAAGACGAGGTTTCTCCCTTTTATTATAAGGTGTTTGTTTAGCGTTCCAAAGAGCTTAGCTATGGAAGTATGTACCAATGCCCTGGCTCTGCCCTG
8mer-w6	9mer-m11.19	A	right	Context_9	TCTACAGTCCGACGATCTAAAAACTCCCTCTACTGCCTTGAAAGGTTATTCTGTTGTGCGCCAAGAATTCAATGGTCATATGCTCAATCAGCAAGACGAGGTTTTATACAACCAATCTGCCTCAGTTTGTTTAGCGTTCCAAAGAGCTTAGCTATGGAAGTATGTACCAATGCCCTGGCTCTGCCCTG
8mer-w6	9mer-m11.19	A	dual	Context_9	TCTACAGTCCGACGATCTAAAAACTCCCTCTACTGCCTTGAAAGGTTATTCTGTTGTTATACAACCAATCTGCCTCACATATGCTCAATCAGCAAGACGAGGTTTTATACAACCAATCTGCCTCAGTTTGTTTAGCGTTCCAAAGAGCTTAGCTATGGAAGTATGTACCAATGCCCTGGCTCTGCCCT
8mer-w6	9mer-m11.19	AAAA	left	Context_9	TCTACAGTCCGACGATCTAAAAACTCCCTCTACTGCCTTGAAAGGTTATTCTGTTGTTATACAACCAAAAATCTGCCTCACATATGCTCAATCAGCAAGACGAGGTTTCTCCCTTTTATTATAAGGTGTTTGTTTAGCGTTCCAAAGAGCTTAGCTATGGAAGTATGTACCAATGCCCTGGCTCTGCC
8mer-w6	9mer-m11.19	AAAA	right	Context_9	TCTACAGTCCGACGATCTAAAAACTCCCTCTACTGCCTTGAAAGGTTATTCTGTTGTGCGCCAAGAATTCAATGGTCATATGCTCAATCAGCAAGACGAGGTTTTATACAACCAAAAATCTGCCTCAGTTTGTTTAGCGTTCCAAAGAGCTTAGCTATGGAAGTATGTACCAATGCCCTGGCTCTGCC
8mer-w6	9mer-m11.19	AAAA	dual	Context_9	TCTACAGTCCGACGATCTAAAAACTCCCTCTACTGCCTTGAAAGGTTATTCTGTTGTTATACAACCAAAAATCTGCCTCACATATGCTCAATCAGCAAGACGAGGTTTTATACAACCAAAAATCTGCCTCAGTTTGTTTAGCGTTCCAAAGAGCTTAGCTATGGAAGTATGTACCAATGCCCTGGCTC
8mer-w6	9mer-m11.19	T	left	Context_9	TCTACAGTCCGACGATCTAAAAACTCCCTCTACTGCCTTGAAAGGTTATTCTGTTGTTATACAACCATTCTGCCTCACATATGCTCAATCAGCAAGACGAGGTTTCTCCCTTTTATTATAAGGTGTTTGTTTAGCGTTCCAAAGAGCTTAGCTATGGAAGTATGTACCAATGCCCTGGCTCTGCCCTG
8mer-w6	9mer-m11.19	T	right	Context_9	TCTACAGTCCGACGATCTAAAAACTCCCTCTACTGCCTTGAAAGGTTATTCTGTTGTGCGCCAAGAATTCAATGGTCATATGCTCAATCAGCAAGACGAGGTTTTATACAACCATTCTGCCTCAGTTTGTTTAGCGTTCCAAAGAGCTTAGCTATGGAAGTATGTACCAATGCCCTGGCTCTGCCCTG
8mer-w6	9mer-m11.19	T	dual	Context_9	TCTACAGTCCGACGATCTAAAAACTCCCTCTACTGCCTTGAAAGGTTATTCTGTTGTTATACAACCATTCTGCCTCACATATGCTCAATCAGCAAGACGAGGTTTTATACAACCATTCTGCCTCAGTTTGTTTAGCGTTCCAAAGAGCTTAGCTATGGAAGTATGTACCAATGCCCTGGCTCTGCCCT
8mer-w6	9mer-m11.19	TTTT	left	Context_9	TCTACAGTCCGACGATCTAAAAACTCCCTCTACTGCCTTGAAAGGTTATTCTGTTGTTATACAACCATTTTTCTGCCTCACATATGCTCAATCAGCAAGACGAGGTTTCTCCCTTTTATTATAAGGTGTTTGTTTAGCGTTCCAAAGAGCTTAGCTATGGAAGTATGTACCAATGCCCTGGCTCTGCC
8mer-w6	9mer-m11.19	TTTT	right	Context_9	TCTACAGTCCGACGATCTAAAAACTCCCTCTACTGCCTTGAAAGGTTATTCTGTTGTGCGCCAAGAATTCAATGGTCATATGCTCAATCAGCAAGACGAGGTTTTATACAACCATTTTTCTGCCTCAGTTTGTTTAGCGTTCCAAAGAGCTTAGCTATGGAAGTATGTACCAATGCCCTGGCTCTGCC
8mer-w6	9mer-m11.19	TTTT	dual	Context_9	TCTACAGTCCGACGATCTAAAAACTCCCTCTACTGCCTTGAAAGGTTATTCTGTTGTTATACAACCATTTTTCTGCCTCACATATGCTCAATCAGCAAGACGAGGTTTTATACAACCATTTTTCTGCCTCAGTTTGTTTAGCGTTCCAAAGAGCTTAGCTATGGAAGTATGTACCAATGCCCTGGCTC
8mer-w6	9mer-m13.21		left	Context_9	TCTACAGTCCGACGATCTAAAAACTCCCTCTACTGCCTTGAAAGGTTATTCTGTTACTATACAAGAATCTGCCTCACATATGCTCAATCAGCAAGACGAGGTTTCTCCCTTTTATTATAAGGTGTTTGTTTAGCGTTCCAAAGAGCTTAGCTATGGAAGTATGTACCAATGCCCTGGCTCTGCCCTGG
8mer-w6	9mer-m13.21		right	Context_9	TCTACAGTCCGACGATCTAAAAACTCCCTCTACTGCCTTGAAAGGTTATTCTGTTGTGCGCCAAGAATTCAATGGTCATATGCTCAATCAGCAAGACGAGGTACTATACAATTATCTGCCTCAGTTTGTTTAGCGTTCCAAAGAGCTTAGCTATGGAAGTATGTACCAATGCCCTGGCTCTGCCCTGG
8mer-w6	9mer-m13.21		dual	Context_9	TCTACAGTCCGACGATCTAAAAACTCCCTCTACTGCCTTGAAAGGTTATTCTGTTACTATACAAGAATCTGCCTCACATATGCTCAATCAGCAAGACGAGGTACTATACAATTATCTGCCTCAGTTTGTTTAGCGTTCCAAAGAGCTTAGCTATGGAAGTATGTACCAATGCCCTGGCTCTGCCCTGG
8mer-w6	9mer-m13.21	A	left	Context_9	TCTACAGTCCGACGATCTAAAAACTCCCTCTACTGCCTTGAAAGGTTATTCTGTTACTATACAAGAAATCTGCCTCACATATGCTCAATCAGCAAGACGAGGTTTCTCCCTTTTATTATAAGGTGTTTGTTTAGCGTTCCAAAGAGCTTAGCTATGGAAGTATGTACCAATGCCCTGGCTCTGCCCTG
8mer-w6	9mer-m13.21	A	right	Context_9	TCTACAGTCCGACGATCTAAAAACTCCCTCTACTGCCTTGAAAGGTTATTCTGTTGTGCGCCAAGAATTCAATGGTCATATGCTCAATCAGCAAGACGAGGTACTATACAATTAATCTGCCTCAGTTTGTTTAGCGTTCCAAAGAGCTTAGCTATGGAAGTATGTACCAATGCCCTGGCTCTGCCCTG
8mer-w6	9mer-m13.21	A	dual	Context_9	TCTACAGTCCGACGATCTAAAAACTCCCTCTACTGCCTTGAAAGGTTATTCTGTTACTATACAAGAAATCTGCCTCACATATGCTCAATCAGCAAGACGAGGTACTATACAATTAATCTGCCTCAGTTTGTTTAGCGTTCCAAAGAGCTTAGCTATGGAAGTATGTACCAATGCCCTGGCTCTGCCCT
8mer-w6	9mer-m13.21	AAAA	left	Context_9	TCTACAGTCCGACGATCTAAAAACTCCCTCTACTGCCTTGAAAGGTTATTCTGTTACTATACAAGAAAAAATCTGCCTCACATATGCTCAATCAGCAAGACGAGGTTTCTCCCTTTTATTATAAGGTGTTTGTTTAGCGTTCCAAAGAGCTTAGCTATGGAAGTATGTACCAATGCCCTGGCTCTGCC
8mer-w6	9mer-m13.21	AAAA	right	Context_9	TCTACAGTCCGACGATCTAAAAACTCCCTCTACTGCCTTGAAAGGTTATTCTGTTGTGCGCCAAGAATTCAATGGTCATATGCTCAATCAGCAAGACGAGGTACTATACAATTAAAAATCTGCCTCAGTTTGTTTAGCGTTCCAAAGAGCTTAGCTATGGAAGTATGTACCAATGCCCTGGCTCTGCC
8mer-w6	9mer-m13.21	AAAA	dual	Context_9	TCTACAGTCCGACGATCTAAAAACTCCCTCTACTGCCTTGAAAGGTTATTCTGTTACTATACAAGAAAAAATCTGCCTCACATATGCTCAATCAGCAAGACGAGGTACTATACAATTAAAAATCTGCCTCAGTTTGTTTAGCGTTCCAAAGAGCTTAGCTATGGAAGTATGTACCAATGCCCTGGCTC
8mer-w6	9mer-m13.21	T	left	Context_9	TCTACAGTCCGACGATCTAAAAACTCCCTCTACTGCCTTGAAAGGTTATTCTGTTACTATACAAGAATTCTGCCTCACATATGCTCAATCAGCAAGACGAGGTTTCTCCCTTTTATTATAAGGTGTTTGTTTAGCGTTCCAAAGAGCTTAGCTATGGAAGTATGTACCAATGCCCTGGCTCTGCCCTG
8mer-w6	9mer-m13.21	T	right	Context_9	TCTACAGTCCGACGATCTAAAAACTCCCTCTACTGCCTTGAAAGGTTATTCTGTTGTGCGCCAAGAATTCAATGGTCATATGCTCAATCAGCAAGACGAGGTACTATACAATTATTCTGCCTCAGTTTGTTTAGCGTTCCAAAGAGCTTAGCTATGGAAGTATGTACCAATGCCCTGGCTCTGCCCTG
8mer-w6	9mer-m13.21	T	dual	Context_9	TCTACAGTCCGACGATCTAAAAACTCCCTCTACTGCCTTGAAAGGTTATTCTGTTACTATACAAGAATTCTGCCTCACATATGCTCAATCAGCAAGACGAGGTACTATACAATTATTCTGCCTCAGTTTGTTTAGCGTTCCAAAGAGCTTAGCTATGGAAGTATGTACCAATGCCCTGGCTCTGCCCT
8mer-w6	9mer-m13.21	TTTT	left	Context_9	TCTACAGTCCGACGATCTAAAAACTCCCTCTACTGCCTTGAAAGGTTATTCTGTTACTATACAAGAATTTTTCTGCCTCACATATGCTCAATCAGCAAGACGAGGTTTCTCCCTTTTATTATAAGGTGTTTGTTTAGCGTTCCAAAGAGCTTAGCTATGGAAGTATGTACCAATGCCCTGGCTCTGCC
8mer-w6	9mer-m13.21	TTTT	right	Context_9	TCTACAGTCCGACGATCTAAAAACTCCCTCTACTGCCTTGAAAGGTTATTCTGTTGTGCGCCAAGAATTCAATGGTCATATGCTCAATCAGCAAGACGAGGTACTATACAATTATTTTTCTGCCTCAGTTTGTTTAGCGTTCCAAAGAGCTTAGCTATGGAAGTATGTACCAATGCCCTGGCTCTGCC
8mer-w6	9mer-m13.21	TTTT	dual	Context_9	TCTACAGTCCGACGATCTAAAAACTCCCTCTACTGCCTTGAAAGGTTATTCTGTTACTATACAAGAATTTTTCTGCCTCACATATGCTCAATCAGCAAGACGAGGTACTATACAATTATTTTTCTGCCTCAGTTTGTTTAGCGTTCCAAAGAGCTTAGCTATGGAAGTATGTACCAATGCCCTGGCTC
No_site_0				Context_9	TCTACAGTCCGACGATCTAAAAACTCCCTCTACTGCCTTGAAAGGTTATTCTGTTGTGCGCCAAGAATTCAATGGTCATATGCTCAATCAGCAAGACGAGGTTTCTCCCTTTTATTATAAGGTGTTTGTTTAGCGTTCCAAAGAGCTTAGCTATGGAAGTATGTACCAATGCCCTGGCTCTGCCCTGG
No_site_1				Context_9	TCTACAGTCCGACGATCTAAAAACTCCCTCTACTGCCTTGAAAGGTTATTCTGTTGGTTACCTTTATTCTTTGACCCATATGCTCAATCAGCAAGACGAGGTTTAAAGATCTTAGTTTTGTTGGTTTGTTTAGCGTTCCAAAGAGCTTAGCTATGGAAGTATGTACCAATGCCCTGGCTCTGCCCTGG
No_site_2				Context_9	TCTACAGTCCGACGATCTAAAAACTCCCTCTACTGCCTTGAAAGGTTATTCTGTTGGGTGACATTAATGACAAAATCATATGCTCAATCAGCAAGACGAGGTTGCCTATAAGCAGCATCATCTGTTTGTTTAGCGTTCCAAAGAGCTTAGCTATGGAAGTATGTACCAATGCCCTGGCTCTGCCCTGG
No_site_3				Context_9	TCTACAGTCCGACGATCTAAAAACTCCCTCTACTGCCTTGAAAGGTTATTCTGTTGTGCGATCATAAAATTATTAGCATATGCTCAATCAGCAAGACGAGGTTGTGGGCATCATTGAACCTGGGTTTGTTTAGCGTTCCAAAGAGCTTAGCTATGGAAGTATGTACCAATGCCCTGGCTCTGCCCTGG
No_site_4				Context_9	TCTACAGTCCGACGATCTAAAAACTCCCTCTACTGCCTTGAAAGGTTATTCTGTTGGGCTCTCAAATTAAAAACAACATATGCTCAATCAGCAAGACGAGGTTACCTTGTGATAAGAGCAACGGTTTGTTTAGCGTTCCAAAGAGCTTAGCTATGGAAGTATGTACCAATGCCCTGGCTCTGCCCTGG
No_site_5				Context_9	TCTACAGTCCGACGATCTAAAAACTCCCTCTACTGCCTTGAAAGGTTATTCTGTTGTTAGAATTATTAGAAAAGGGCATATGCTCAATCAGCAAGACGAGGTTCTGTGTGTCATTTTCTAAGTGTTTGTTTAGCGTTCCAAAGAGCTTAGCTATGGAAGTATGTACCAATGCCCTGGCTCTGCCCTGG
No_site_6				Context_9	TCTACAGTCCGACGATCTAAAAACTCCCTCTACTGCCTTGAAAGGTTATTCTGTTGACTGTTCGTAAAAACTGTGGCATATGCTCAATCAGCAAGACGAGGTTAGGCTTATGTTACTGACGCTGTTTGTTTAGCGTTCCAAAGAGCTTAGCTATGGAAGTATGTACCAATGCCCTGGCTCTGCCCTGG
lin-41	9mer-m11.19	T	dual	Context_10	TCTACAGTCCGACGATCATACTTCCGATTGTTTGCAAATTGATACTTACCAGGGTAGTATACAACCATTCTACACTCAAGCCTGCATAGATTGATGCCGTCCCCGGTATACAACCATTCTGCCTCTTGCTTTGGGGAGCTAAAAAAATGAGAGCCCTGGGCTGCTCTACCAATGCCCTGGCTCTGCCC
8mer			left	Context_10	TCTACAGTCCGACGATCATACTTCCGATTGTTTGCAAATTGATACTTACCAGGGTAGCGCCCCCAAATCTACCTCAAGCCTGCATAGATTGATGCCGTCCCCGGCAAGCTCTTATGCAGTCCTTGCTTTGGGGAGCTAAAAAAATGAGAGCCCTGGGCTGCTCTACCAATGCCCTGGCTCTGCCCTGG
8mer			right	Context_10	TCTACAGTCCGACGATCATACTTCCGATTGTTTGCAAATTGATACTTACCAGGGTAGCGCCCCCAAATGGTAAACCAGCCTGCATAGATTGATGCCGTCCCCGGCAAGCTCTTATCTACCTCATGCTTTGGGGAGCTAAAAAAATGAGAGCCCTGGGCTGCTCTACCAATGCCCTGGCTCTGCCCTGG
8mer			dual	Context_10	TCTACAGTCCGACGATCATACTTCCGATTGTTTGCAAATTGATACTTACCAGGGTAGCGCCCCCAAATCTACCTCAAGCCTGCATAGATTGATGCCGTCCCCGGCAAGCTCTTATCTACCTCATGCTTTGGGGAGCTAAAAAAATGAGAGCCCTGGGCTGCTCTACCAATGCCCTGGCTCTGCCCTGG
7mer-m8			left	Context_10	TCTACAGTCCGACGATCATACTTCCGATTGTTTGCAAATTGATACTTACCAGGGTAGCGCCCCCAAATCTACCTCCAGCCTGCATAGATTGATGCCGTCCCCGGCAAGCTCTTATGCAGTCCTTGCTTTGGGGAGCTAAAAAAATGAGAGCCCTGGGCTGCTCTACCAATGCCCTGGCTCTGCCCTGG
7mer-m8			right	Context_10	TCTACAGTCCGACGATCATACTTCCGATTGTTTGCAAATTGATACTTACCAGGGTAGCGCCCCCAAATGGTAAACCAGCCTGCATAGATTGATGCCGTCCCCGGCAAGCTCTTATCTACCTCTTGCTTTGGGGAGCTAAAAAAATGAGAGCCCTGGGCTGCTCTACCAATGCCCTGGCTCTGCCCTGG
7mer-m8			dual	Context_10	TCTACAGTCCGACGATCATACTTCCGATTGTTTGCAAATTGATACTTACCAGGGTAGCGCCCCCAAATCTACCTCCAGCCTGCATAGATTGATGCCGTCCCCGGCAAGCTCTTATCTACCTCTTGCTTTGGGGAGCTAAAAAAATGAGAGCCCTGGGCTGCTCTACCAATGCCCTGGCTCTGCCCTGG
7mer-A1			left	Context_10	TCTACAGTCCGACGATCATACTTCCGATTGTTTGCAAATTGATACTTACCAGGGTAGCGCCCCCAAATGTACCTCAAGCCTGCATAGATTGATGCCGTCCCCGGCAAGCTCTTATGCAGTCCTTGCTTTGGGGAGCTAAAAAAATGAGAGCCCTGGGCTGCTCTACCAATGCCCTGGCTCTGCCCTGG
7mer-A1			right	Context_10	TCTACAGTCCGACGATCATACTTCCGATTGTTTGCAAATTGATACTTACCAGGGTAGCGCCCCCAAATGGTAAACCAGCCTGCATAGATTGATGCCGTCCCCGGCAAGCTCTTATGTACCTCATGCTTTGGGGAGCTAAAAAAATGAGAGCCCTGGGCTGCTCTACCAATGCCCTGGCTCTGCCCTGG
7mer-A1			dual	Context_10	TCTACAGTCCGACGATCATACTTCCGATTGTTTGCAAATTGATACTTACCAGGGTAGCGCCCCCAAATGTACCTCAAGCCTGCATAGATTGATGCCGTCCCCGGCAAGCTCTTATGTACCTCATGCTTTGGGGAGCTAAAAAAATGAGAGCCCTGGGCTGCTCTACCAATGCCCTGGCTCTGCCCTGG
6mer			left	Context_10	TCTACAGTCCGACGATCATACTTCCGATTGTTTGCAAATTGATACTTACCAGGGTAGCGCCCCCAAATGTACCTCCAGCCTGCATAGATTGATGCCGTCCCCGGCAAGCTCTTATGCAGTCCTTGCTTTGGGGAGCTAAAAAAATGAGAGCCCTGGGCTGCTCTACCAATGCCCTGGCTCTGCCCTGG
6mer			right	Context_10	TCTACAGTCCGACGATCATACTTCCGATTGTTTGCAAATTGATACTTACCAGGGTAGCGCCCCCAAATGGTAAACCAGCCTGCATAGATTGATGCCGTCCCCGGCAAGCTCTTATGTACCTCTTGCTTTGGGGAGCTAAAAAAATGAGAGCCCTGGGCTGCTCTACCAATGCCCTGGCTCTGCCCTGG
6mer			dual	Context_10	TCTACAGTCCGACGATCATACTTCCGATTGTTTGCAAATTGATACTTACCAGGGTAGCGCCCCCAAATGTACCTCCAGCCTGCATAGATTGATGCCGTCCCCGGCAAGCTCTTATGTACCTCTTGCTTTGGGGAGCTAAAAAAATGAGAGCCCTGGGCTGCTCTACCAATGCCCTGGCTCTGCCCTGG
8mer-w6			left	Context_10	TCTACAGTCCGACGATCATACTTCCGATTGTTTGCAAATTGATACTTACCAGGGTAGCGCCCCCAAATCTGCCTCAAGCCTGCATAGATTGATGCCGTCCCCGGCAAGCTCTTATGCAGTCCTTGCTTTGGGGAGCTAAAAAAATGAGAGCCCTGGGCTGCTCTACCAATGCCCTGGCTCTGCCCTGG
8mer-w6			right	Context_10	TCTACAGTCCGACGATCATACTTCCGATTGTTTGCAAATTGATACTTACCAGGGTAGCGCCCCCAAATGGTAAACCAGCCTGCATAGATTGATGCCGTCCCCGGCAAGCTCTTATCTGCCTCATGCTTTGGGGAGCTAAAAAAATGAGAGCCCTGGGCTGCTCTACCAATGCCCTGGCTCTGCCCTGG
8mer-w6			dual	Context_10	TCTACAGTCCGACGATCATACTTCCGATTGTTTGCAAATTGATACTTACCAGGGTAGCGCCCCCAAATCTGCCTCAAGCCTGCATAGATTGATGCCGTCCCCGGCAAGCTCTTATCTGCCTCATGCTTTGGGGAGCTAAAAAAATGAGAGCCCTGGGCTGCTCTACCAATGCCCTGGCTCTGCCCTGG
8mer-w6	4mer-m13.16		left	Context_10	TCTACAGTCCGACGATCATACTTCCGATTGTTTGCAAATTGATACTTACCAGGGTAGCGCACAAAAATCTGCCTCAAGCCTGCATAGATTGATGCCGTCCCCGGCAAGCTCTTATGCAGTCCTTGCTTTGGGGAGCTAAAAAAATGAGAGCCCTGGGCTGCTCTACCAATGCCCTGGCTCTGCCCTGG
8mer-w6	4mer-m13.16		right	Context_10	TCTACAGTCCGACGATCATACTTCCGATTGTTTGCAAATTGATACTTACCAGGGTAGCGCCCCCAAATGGTAAACCAGCCTGCATAGATTGATGCCGTCCCCGGCAAACAATTATCTGCCTCATGCTTTGGGGAGCTAAAAAAATGAGAGCCCTGGGCTGCTCTACCAATGCCCTGGCTCTGCCCTGG
8mer-w6	4mer-m13.16		dual	Context_10	TCTACAGTCCGACGATCATACTTCCGATTGTTTGCAAATTGATACTTACCAGGGTAGCGCACAAAAATCTGCCTCAAGCCTGCATAGATTGATGCCGTCCCCGGCAAACAATTATCTGCCTCATGCTTTGGGGAGCTAAAAAAATGAGAGCCCTGGGCTGCTCTACCAATGCCCTGGCTCTGCCCTGG
8mer-w6	4mer-m13.16	A	left	Context_10	TCTACAGTCCGACGATCATACTTCCGATTGTTTGCAAATTGATACTTACCAGGGTAGCGCACAAAAAATCTGCCTCAAGCCTGCATAGATTGATGCCGTCCCCGGCAAGCTCTTATGCAGTCCTTGCTTTGGGGAGCTAAAAAAATGAGAGCCCTGGGCTGCTCTACCAATGCCCTGGCTCTGCCCTG
8mer-w6	4mer-m13.16	A	right	Context_10	TCTACAGTCCGACGATCATACTTCCGATTGTTTGCAAATTGATACTTACCAGGGTAGCGCCCCCAAATGGTAAACCAGCCTGCATAGATTGATGCCGTCCCCGGCAAACAATTAATCTGCCTCATGCTTTGGGGAGCTAAAAAAATGAGAGCCCTGGGCTGCTCTACCAATGCCCTGGCTCTGCCCTG
8mer-w6	4mer-m13.16	A	dual	Context_10	TCTACAGTCCGACGATCATACTTCCGATTGTTTGCAAATTGATACTTACCAGGGTAGCGCACAAAAAATCTGCCTCAAGCCTGCATAGATTGATGCCGTCCCCGGCAAACAATTAATCTGCCTCATGCTTTGGGGAGCTAAAAAAATGAGAGCCCTGGGCTGCTCTACCAATGCCCTGGCTCTGCCCT
8mer-w6	4mer-m13.16	AAAA	left	Context_10	TCTACAGTCCGACGATCATACTTCCGATTGTTTGCAAATTGATACTTACCAGGGTAGCGCACAAAAAAAAATCTGCCTCAAGCCTGCATAGATTGATGCCGTCCCCGGCAAGCTCTTATGCAGTCCTTGCTTTGGGGAGCTAAAAAAATGAGAGCCCTGGGCTGCTCTACCAATGCCCTGGCTCTGCC
8mer-w6	4mer-m13.16	AAAA	right	Context_10	TCTACAGTCCGACGATCATACTTCCGATTGTTTGCAAATTGATACTTACCAGGGTAGCGCCCCCAAATGGTAAACCAGCCTGCATAGATTGATGCCGTCCCCGGCAAACAATTAAAAATCTGCCTCATGCTTTGGGGAGCTAAAAAAATGAGAGCCCTGGGCTGCTCTACCAATGCCCTGGCTCTGCC
8mer-w6	4mer-m13.16	AAAA	dual	Context_10	TCTACAGTCCGACGATCATACTTCCGATTGTTTGCAAATTGATACTTACCAGGGTAGCGCACAAAAAAAAATCTGCCTCAAGCCTGCATAGATTGATGCCGTCCCCGGCAAACAATTAAAAATCTGCCTCATGCTTTGGGGAGCTAAAAAAATGAGAGCCCTGGGCTGCTCTACCAATGCCCTGGCTC
8mer-w6	4mer-m13.16	T	left	Context_10	TCTACAGTCCGACGATCATACTTCCGATTGTTTGCAAATTGATACTTACCAGGGTAGCGCACAAAAATTCTGCCTCAAGCCTGCATAGATTGATGCCGTCCCCGGCAAGCTCTTATGCAGTCCTTGCTTTGGGGAGCTAAAAAAATGAGAGCCCTGGGCTGCTCTACCAATGCCCTGGCTCTGCCCTG
8mer-w6	4mer-m13.16	T	right	Context_10	TCTACAGTCCGACGATCATACTTCCGATTGTTTGCAAATTGATACTTACCAGGGTAGCGCCCCCAAATGGTAAACCAGCCTGCATAGATTGATGCCGTCCCCGGCAAACAATTATTCTGCCTCATGCTTTGGGGAGCTAAAAAAATGAGAGCCCTGGGCTGCTCTACCAATGCCCTGGCTCTGCCCTG
8mer-w6	4mer-m13.16	T	dual	Context_10	TCTACAGTCCGACGATCATACTTCCGATTGTTTGCAAATTGATACTTACCAGGGTAGCGCACAAAAATTCTGCCTCAAGCCTGCATAGATTGATGCCGTCCCCGGCAAACAATTATTCTGCCTCATGCTTTGGGGAGCTAAAAAAATGAGAGCCCTGGGCTGCTCTACCAATGCCCTGGCTCTGCCCT
8mer-w6	4mer-m13.16	TTTT	left	Context_10	TCTACAGTCCGACGATCATACTTCCGATTGTTTGCAAATTGATACTTACCAGGGTAGCGCACAAAAATTTTTCTGCCTCAAGCCTGCATAGATTGATGCCGTCCCCGGCAAGCTCTTATGCAGTCCTTGCTTTGGGGAGCTAAAAAAATGAGAGCCCTGGGCTGCTCTACCAATGCCCTGGCTCTGCC
8mer-w6	4mer-m13.16	TTTT	right	Context_10	TCTACAGTCCGACGATCATACTTCCGATTGTTTGCAAATTGATACTTACCAGGGTAGCGCCCCCAAATGGTAAACCAGCCTGCATAGATTGATGCCGTCCCCGGCAAACAATTATTTTTCTGCCTCATGCTTTGGGGAGCTAAAAAAATGAGAGCCCTGGGCTGCTCTACCAATGCCCTGGCTCTGCC
8mer-w6	4mer-m13.16	TTTT	dual	Context_10	TCTACAGTCCGACGATCATACTTCCGATTGTTTGCAAATTGATACTTACCAGGGTAGCGCACAAAAATTTTTCTGCCTCAAGCCTGCATAGATTGATGCCGTCCCCGGCAAACAATTATTTTTCTGCCTCATGCTTTGGGGAGCTAAAAAAATGAGAGCCCTGGGCTGCTCTACCAATGCCCTGGCTC
8mer-w6	9mer-m11.19		left	Context_10	TCTACAGTCCGACGATCATACTTCCGATTGTTTGCAAATTGATACTTACCAGGGTAGTATACAACCATCTGCCTCAAGCCTGCATAGATTGATGCCGTCCCCGGCAAGCTCTTATGCAGTCCTTGCTTTGGGGAGCTAAAAAAATGAGAGCCCTGGGCTGCTCTACCAATGCCCTGGCTCTGCCCTGG
8mer-w6	9mer-m11.19		right	Context_10	TCTACAGTCCGACGATCATACTTCCGATTGTTTGCAAATTGATACTTACCAGGGTAGCGCCCCCAAATGGTAAACCAGCCTGCATAGATTGATGCCGTCCCCGGTATACAACCATCTGCCTCATGCTTTGGGGAGCTAAAAAAATGAGAGCCCTGGGCTGCTCTACCAATGCCCTGGCTCTGCCCTGG
8mer-w6	9mer-m11.19		dual	Context_10	TCTACAGTCCGACGATCATACTTCCGATTGTTTGCAAATTGATACTTACCAGGGTAGTATACAACCATCTGCCTCAAGCCTGCATAGATTGATGCCGTCCCCGGTATACAACCATCTGCCTCATGCTTTGGGGAGCTAAAAAAATGAGAGCCCTGGGCTGCTCTACCAATGCCCTGGCTCTGCCCTGG
8mer-w6	9mer-m11.19	A	left	Context_10	TCTACAGTCCGACGATCATACTTCCGATTGTTTGCAAATTGATACTTACCAGGGTAGTATACAACCAATCTGCCTCAAGCCTGCATAGATTGATGCCGTCCCCGGCAAGCTCTTATGCAGTCCTTGCTTTGGGGAGCTAAAAAAATGAGAGCCCTGGGCTGCTCTACCAATGCCCTGGCTCTGCCCTG
8mer-w6	9mer-m11.19	A	right	Context_10	TCTACAGTCCGACGATCATACTTCCGATTGTTTGCAAATTGATACTTACCAGGGTAGCGCCCCCAAATGGTAAACCAGCCTGCATAGATTGATGCCGTCCCCGGTATACAACCAATCTGCCTCATGCTTTGGGGAGCTAAAAAAATGAGAGCCCTGGGCTGCTCTACCAATGCCCTGGCTCTGCCCTG
8mer-w6	9mer-m11.19	A	dual	Context_10	TCTACAGTCCGACGATCATACTTCCGATTGTTTGCAAATTGATACTTACCAGGGTAGTATACAACCAATCTGCCTCAAGCCTGCATAGATTGATGCCGTCCCCGGTATACAACCAATCTGCCTCATGCTTTGGGGAGCTAAAAAAATGAGAGCCCTGGGCTGCTCTACCAATGCCCTGGCTCTGCCCT
8mer-w6	9mer-m11.19	AAAA	left	Context_10	TCTACAGTCCGACGATCATACTTCCGATTGTTTGCAAATTGATACTTACCAGGGTAGTATACAACCAAAAATCTGCCTCAAGCCTGCATAGATTGATGCCGTCCCCGGCAAGCTCTTATGCAGTCCTTGCTTTGGGGAGCTAAAAAAATGAGAGCCCTGGGCTGCTCTACCAATGCCCTGGCTCTGCC
8mer-w6	9mer-m11.19	AAAA	right	Context_10	TCTACAGTCCGACGATCATACTTCCGATTGTTTGCAAATTGATACTTACCAGGGTAGCGCCCCCAAATGGTAAACCAGCCTGCATAGATTGATGCCGTCCCCGGTATACAACCAAAAATCTGCCTCATGCTTTGGGGAGCTAAAAAAATGAGAGCCCTGGGCTGCTCTACCAATGCCCTGGCTCTGCC
8mer-w6	9mer-m11.19	AAAA	dual	Context_10	TCTACAGTCCGACGATCATACTTCCGATTGTTTGCAAATTGATACTTACCAGGGTAGTATACAACCAAAAATCTGCCTCAAGCCTGCATAGATTGATGCCGTCCCCGGTATACAACCAAAAATCTGCCTCATGCTTTGGGGAGCTAAAAAAATGAGAGCCCTGGGCTGCTCTACCAATGCCCTGGCTC
8mer-w6	9mer-m11.19	T	left	Context_10	TCTACAGTCCGACGATCATACTTCCGATTGTTTGCAAATTGATACTTACCAGGGTAGTATACAACCATTCTGCCTCAAGCCTGCATAGATTGATGCCGTCCCCGGCAAGCTCTTATGCAGTCCTTGCTTTGGGGAGCTAAAAAAATGAGAGCCCTGGGCTGCTCTACCAATGCCCTGGCTCTGCCCTG
8mer-w6	9mer-m11.19	T	right	Context_10	TCTACAGTCCGACGATCATACTTCCGATTGTTTGCAAATTGATACTTACCAGGGTAGCGCCCCCAAATGGTAAACCAGCCTGCATAGATTGATGCCGTCCCCGGTATACAACCATTCTGCCTCATGCTTTGGGGAGCTAAAAAAATGAGAGCCCTGGGCTGCTCTACCAATGCCCTGGCTCTGCCCTG
8mer-w6	9mer-m11.19	T	dual	Context_10	TCTACAGTCCGACGATCATACTTCCGATTGTTTGCAAATTGATACTTACCAGGGTAGTATACAACCATTCTGCCTCAAGCCTGCATAGATTGATGCCGTCCCCGGTATACAACCATTCTGCCTCATGCTTTGGGGAGCTAAAAAAATGAGAGCCCTGGGCTGCTCTACCAATGCCCTGGCTCTGCCCT
8mer-w6	9mer-m11.19	TTTT	left	Context_10	TCTACAGTCCGACGATCATACTTCCGATTGTTTGCAAATTGATACTTACCAGGGTAGTATACAACCATTTTTCTGCCTCAAGCCTGCATAGATTGATGCCGTCCCCGGCAAGCTCTTATGCAGTCCTTGCTTTGGGGAGCTAAAAAAATGAGAGCCCTGGGCTGCTCTACCAATGCCCTGGCTCTGCC
8mer-w6	9mer-m11.19	TTTT	right	Context_10	TCTACAGTCCGACGATCATACTTCCGATTGTTTGCAAATTGATACTTACCAGGGTAGCGCCCCCAAATGGTAAACCAGCCTGCATAGATTGATGCCGTCCCCGGTATACAACCATTTTTCTGCCTCATGCTTTGGGGAGCTAAAAAAATGAGAGCCCTGGGCTGCTCTACCAATGCCCTGGCTCTGCC
8mer-w6	9mer-m11.19	TTTT	dual	Context_10	TCTACAGTCCGACGATCATACTTCCGATTGTTTGCAAATTGATACTTACCAGGGTAGTATACAACCATTTTTCTGCCTCAAGCCTGCATAGATTGATGCCGTCCCCGGTATACAACCATTTTTCTGCCTCATGCTTTGGGGAGCTAAAAAAATGAGAGCCCTGGGCTGCTCTACCAATGCCCTGGCTC
8mer-w6	9mer-m13.21		left	Context_10	TCTACAGTCCGACGATCATACTTCCGATTGTTTGCAAATTGATACTTACCAGGGTACTATACAAAAATCTGCCTCAAGCCTGCATAGATTGATGCCGTCCCCGGCAAGCTCTTATGCAGTCCTTGCTTTGGGGAGCTAAAAAAATGAGAGCCCTGGGCTGCTCTACCAATGCCCTGGCTCTGCCCTGG
8mer-w6	9mer-m13.21		right	Context_10	TCTACAGTCCGACGATCATACTTCCGATTGTTTGCAAATTGATACTTACCAGGGTAGCGCCCCCAAATGGTAAACCAGCCTGCATAGATTGATGCCGTCCCCACTATACAATTATCTGCCTCATGCTTTGGGGAGCTAAAAAAATGAGAGCCCTGGGCTGCTCTACCAATGCCCTGGCTCTGCCCTGG
8mer-w6	9mer-m13.21		dual	Context_10	TCTACAGTCCGACGATCATACTTCCGATTGTTTGCAAATTGATACTTACCAGGGTACTATACAAAAATCTGCCTCAAGCCTGCATAGATTGATGCCGTCCCCACTATACAATTATCTGCCTCATGCTTTGGGGAGCTAAAAAAATGAGAGCCCTGGGCTGCTCTACCAATGCCCTGGCTCTGCCCTGG
8mer-w6	9mer-m13.21	A	left	Context_10	TCTACAGTCCGACGATCATACTTCCGATTGTTTGCAAATTGATACTTACCAGGGTACTATACAAAAAATCTGCCTCAAGCCTGCATAGATTGATGCCGTCCCCGGCAAGCTCTTATGCAGTCCTTGCTTTGGGGAGCTAAAAAAATGAGAGCCCTGGGCTGCTCTACCAATGCCCTGGCTCTGCCCTG
8mer-w6	9mer-m13.21	A	right	Context_10	TCTACAGTCCGACGATCATACTTCCGATTGTTTGCAAATTGATACTTACCAGGGTAGCGCCCCCAAATGGTAAACCAGCCTGCATAGATTGATGCCGTCCCCACTATACAATTAATCTGCCTCATGCTTTGGGGAGCTAAAAAAATGAGAGCCCTGGGCTGCTCTACCAATGCCCTGGCTCTGCCCTG
8mer-w6	9mer-m13.21	A	dual	Context_10	TCTACAGTCCGACGATCATACTTCCGATTGTTTGCAAATTGATACTTACCAGGGTACTATACAAAAAATCTGCCTCAAGCCTGCATAGATTGATGCCGTCCCCACTATACAATTAATCTGCCTCATGCTTTGGGGAGCTAAAAAAATGAGAGCCCTGGGCTGCTCTACCAATGCCCTGGCTCTGCCCT
8mer-w6	9mer-m13.21	AAAA	left	Context_10	TCTACAGTCCGACGATCATACTTCCGATTGTTTGCAAATTGATACTTACCAGGGTACTATACAAAAAAAAATCTGCCTCAAGCCTGCATAGATTGATGCCGTCCCCGGCAAGCTCTTATGCAGTCCTTGCTTTGGGGAGCTAAAAAAATGAGAGCCCTGGGCTGCTCTACCAATGCCCTGGCTCTGCC
8mer-w6	9mer-m13.21	AAAA	right	Context_10	TCTACAGTCCGACGATCATACTTCCGATTGTTTGCAAATTGATACTTACCAGGGTAGCGCCCCCAAATGGTAAACCAGCCTGCATAGATTGATGCCGTCCCCACTATACAATTAAAAATCTGCCTCATGCTTTGGGGAGCTAAAAAAATGAGAGCCCTGGGCTGCTCTACCAATGCCCTGGCTCTGCC
8mer-w6	9mer-m13.21	AAAA	dual	Context_10	TCTACAGTCCGACGATCATACTTCCGATTGTTTGCAAATTGATACTTACCAGGGTACTATACAAAAAAAAATCTGCCTCAAGCCTGCATAGATTGATGCCGTCCCCACTATACAATTAAAAATCTGCCTCATGCTTTGGGGAGCTAAAAAAATGAGAGCCCTGGGCTGCTCTACCAATGCCCTGGCTC
8mer-w6	9mer-m13.21	T	left	Context_10	TCTACAGTCCGACGATCATACTTCCGATTGTTTGCAAATTGATACTTACCAGGGTACTATACAAAAATTCTGCCTCAAGCCTGCATAGATTGATGCCGTCCCCGGCAAGCTCTTATGCAGTCCTTGCTTTGGGGAGCTAAAAAAATGAGAGCCCTGGGCTGCTCTACCAATGCCCTGGCTCTGCCCTG
8mer-w6	9mer-m13.21	T	right	Context_10	TCTACAGTCCGACGATCATACTTCCGATTGTTTGCAAATTGATACTTACCAGGGTAGCGCCCCCAAATGGTAAACCAGCCTGCATAGATTGATGCCGTCCCCACTATACAATTATTCTGCCTCATGCTTTGGGGAGCTAAAAAAATGAGAGCCCTGGGCTGCTCTACCAATGCCCTGGCTCTGCCCTG
8mer-w6	9mer-m13.21	T	dual	Context_10	TCTACAGTCCGACGATCATACTTCCGATTGTTTGCAAATTGATACTTACCAGGGTACTATACAAAAATTCTGCCTCAAGCCTGCATAGATTGATGCCGTCCCCACTATACAATTATTCTGCCTCATGCTTTGGGGAGCTAAAAAAATGAGAGCCCTGGGCTGCTCTACCAATGCCCTGGCTCTGCCCT
8mer-w6	9mer-m13.21	TTTT	left	Context_10	TCTACAGTCCGACGATCATACTTCCGATTGTTTGCAAATTGATACTTACCAGGGTACTATACAAAAATTTTTCTGCCTCAAGCCTGCATAGATTGATGCCGTCCCCGGCAAGCTCTTATGCAGTCCTTGCTTTGGGGAGCTAAAAAAATGAGAGCCCTGGGCTGCTCTACCAATGCCCTGGCTCTGCC
8mer-w6	9mer-m13.21	TTTT	right	Context_10	TCTACAGTCCGACGATCATACTTCCGATTGTTTGCAAATTGATACTTACCAGGGTAGCGCCCCCAAATGGTAAACCAGCCTGCATAGATTGATGCCGTCCCCACTATACAATTATTTTTCTGCCTCATGCTTTGGGGAGCTAAAAAAATGAGAGCCCTGGGCTGCTCTACCAATGCCCTGGCTCTGCC
8mer-w6	9mer-m13.21	TTTT	dual	Context_10	TCTACAGTCCGACGATCATACTTCCGATTGTTTGCAAATTGATACTTACCAGGGTACTATACAAAAATTTTTCTGCCTCAAGCCTGCATAGATTGATGCCGTCCCCACTATACAATTATTTTTCTGCCTCATGCTTTGGGGAGCTAAAAAAATGAGAGCCCTGGGCTGCTCTACCAATGCCCTGGCTC
No_site_0				Context_10	TCTACAGTCCGACGATCATACTTCCGATTGTTTGCAAATTGATACTTACCAGGGTAGCGCCCCCAAATGGTAAACCAGCCTGCATAGATTGATGCCGTCCCCGGCAAGCTCTTATGCAGTCCTTGCTTTGGGGAGCTAAAAAAATGAGAGCCCTGGGCTGCTCTACCAATGCCCTGGCTCTGCCCTGG
No_site_1				Context_10	TCTACAGTCCGACGATCATACTTCCGATTGTTTGCAAATTGATACTTACCAGGGTATGGCCAGTTTTAATGAATTCAGCCTGCATAGATTGATGCCGTCCCCGGGAAACCTCCCATACCAGAATGCTTTGGGGAGCTAAAAAAATGAGAGCCCTGGGCTGCTCTACCAATGCCCTGGCTCTGCCCTGG
No_site_2				Context_10	TCTACAGTCCGACGATCATACTTCCGATTGTTTGCAAATTGATACTTACCAGGGTATTTCTGGGTTTTGTTCATTGAGCCTGCATAGATTGATGCCGTCCCCGGCCCACTTTTAATTGGCTGATGCTTTGGGGAGCTAAAAAAATGAGAGCCCTGGGCTGCTCTACCAATGCCCTGGCTCTGCCCTGG
No_site_3				Context_10	TCTACAGTCCGACGATCATACTTCCGATTGTTTGCAAATTGATACTTACCAGGGTACTCTCAGCTAAACTAGAGTTAGCCTGCATAGATTGATGCCGTCCCCGTCAGACCTCTAGGGGTTAGCTGCTTTGGGGAGCTAAAAAAATGAGAGCCCTGGGCTGCTCTACCAATGCCCTGGCTCTGCCCTGG
No_site_4				Context_10	TCTACAGTCCGACGATCATACTTCCGATTGTTTGCAAATTGATACTTACCAGGGTAGCAGAATTTTTTTGCTAAAAAGCCTGCATAGATTGATGCCGTCCCCGTGTCCTGTCATTCATTCGCTTGCTTTGGGGAGCTAAAAAAATGAGAGCCCTGGGCTGCTCTACCAATGCCCTGGCTCTGCCCTGG
No_site_5				Context_10	TCTACAGTCCGACGATCATACTTCCGATTGTTTGCAAATTGATACTTACCAGGGTATGAAGTTCAAAAAATTCTTTAGCCTGCATAGATTGATGCCGTCCCCGTCTCTGCAGTTTGGTCCTTGTGCTTTGGGGAGCTAAAAAAATGAGAGCCCTGGGCTGCTCTACCAATGCCCTGGCTCTGCCCTGG
No_site_6				Context_10	TCTACAGTCCGACGATCATACTTCCGATTGTTTGCAAATTGATACTTACCAGGGTAGTCCAATGTTTACAAAGTTCAGCCTGCATAGATTGATGCCGTCCCCGGTGAGCGGCATTGGAAAATTTGCTTTGGGGAGCTAAAAAAATGAGAGCCCTGGGCTGCTCTACCAATGCCCTGGCTCTGCCCTGG
lin-41	9mer-m11.19	T	dual	Context_11	TCTACAGTCCGACGATCATTGAGGAGAGAAGAGAGCAGCCTTAGTTTGGTTCTGGCATATACAACCATTCTACACTCAGTTGAGGTGTTGGATTCTTGCAAGAGAGTATACAACCATTCTGCCTCGGTTATGGAGGTAAATCAGTTAACTCTTGAGGAGGCATAGTTACCAATGCCCTGGCTCTGCCC
8mer			left	Context_11	TCTACAGTCCGACGATCATTGAGGAGAGAAGAGAGCAGCCTTAGTTTGGTTCTGGCAAAAAATAGAATCTACCTCAGTTGAGGTGTTGGATTCTTGCAAGAGAGTGGCCCATTATTAAGCACGGTTATGGAGGTAAATCAGTTAACTCTTGAGGAGGCATAGTTACCAATGCCCTGGCTCTGCCCTGG
8mer			right	Context_11	TCTACAGTCCGACGATCATTGAGGAGAGAAGAGAGCAGCCTTAGTTTGGTTCTGGCAAAAAATAGAATGGCAATTTGTTGAGGTGTTGGATTCTTGCAAGAGAGTGGCCCATTATCTACCTCAGTTATGGAGGTAAATCAGTTAACTCTTGAGGAGGCATAGTTACCAATGCCCTGGCTCTGCCCTGG
8mer			dual	Context_11	TCTACAGTCCGACGATCATTGAGGAGAGAAGAGAGCAGCCTTAGTTTGGTTCTGGCAAAAAATAGAATCTACCTCAGTTGAGGTGTTGGATTCTTGCAAGAGAGTGGCCCATTATCTACCTCAGTTATGGAGGTAAATCAGTTAACTCTTGAGGAGGCATAGTTACCAATGCCCTGGCTCTGCCCTGG
7mer-m8			left	Context_11	TCTACAGTCCGACGATCATTGAGGAGAGAAGAGAGCAGCCTTAGTTTGGTTCTGGCAAAAAATAGAATCTACCTCTGTTGAGGTGTTGGATTCTTGCAAGAGAGTGGCCCATTATTAAGCACGGTTATGGAGGTAAATCAGTTAACTCTTGAGGAGGCATAGTTACCAATGCCCTGGCTCTGCCCTGG
7mer-m8			right	Context_11	TCTACAGTCCGACGATCATTGAGGAGAGAAGAGAGCAGCCTTAGTTTGGTTCTGGCAAAAAATAGAATGGCAATTTGTTGAGGTGTTGGATTCTTGCAAGAGAGTGGCCCATTATCTACCTCGGTTATGGAGGTAAATCAGTTAACTCTTGAGGAGGCATAGTTACCAATGCCCTGGCTCTGCCCTGG
7mer-m8			dual	Context_11	TCTACAGTCCGACGATCATTGAGGAGAGAAGAGAGCAGCCTTAGTTTGGTTCTGGCAAAAAATAGAATCTACCTCTGTTGAGGTGTTGGATTCTTGCAAGAGAGTGGCCCATTATCTACCTCGGTTATGGAGGTAAATCAGTTAACTCTTGAGGAGGCATAGTTACCAATGCCCTGGCTCTGCCCTGG
7mer-A1			left	Context_11	TCTACAGTCCGACGATCATTGAGGAGAGAAGAGAGCAGCCTTAGTTTGGTTCTGGCAAAAAATAGAATGTACCTCAGTTGAGGTGTTGGATTCTTGCAAGAGAGTGGCCCATTATTAAGCACGGTTATGGAGGTAAATCAGTTAACTCTTGAGGAGGCATAGTTACCAATGCCCTGGCTCTGCCCTGG
7mer-A1			right	Context_11	TCTACAGTCCGACGATCATTGAGGAGAGAAGAGAGCAGCCTTAGTTTGGTTCTGGCAAAAAATAGAATGGCAATTTGTTGAGGTGTTGGATTCTTGCAAGAGAGTGGCCCATTATTTACCTCAGTTATGGAGGTAAATCAGTTAACTCTTGAGGAGGCATAGTTACCAATGCCCTGGCTCTGCCCTGG
7mer-A1			dual	Context_11	TCTACAGTCCGACGATCATTGAGGAGAGAAGAGAGCAGCCTTAGTTTGGTTCTGGCAAAAAATAGAATGTACCTCAGTTGAGGTGTTGGATTCTTGCAAGAGAGTGGCCCATTATTTACCTCAGTTATGGAGGTAAATCAGTTAACTCTTGAGGAGGCATAGTTACCAATGCCCTGGCTCTGCCCTGG
6mer			left	Context_11	TCTACAGTCCGACGATCATTGAGGAGAGAAGAGAGCAGCCTTAGTTTGGTTCTGGCAAAAAATAGAATGTACCTCTGTTGAGGTGTTGGATTCTTGCAAGAGAGTGGCCCATTATTAAGCACGGTTATGGAGGTAAATCAGTTAACTCTTGAGGAGGCATAGTTACCAATGCCCTGGCTCTGCCCTGG
6mer			right	Context_11	TCTACAGTCCGACGATCATTGAGGAGAGAAGAGAGCAGCCTTAGTTTGGTTCTGGCAAAAAATAGAATGGCAATTTGTTGAGGTGTTGGATTCTTGCAAGAGAGTGGCCCATTATTTACCTCGGTTATGGAGGTAAATCAGTTAACTCTTGAGGAGGCATAGTTACCAATGCCCTGGCTCTGCCCTGG
6mer			dual	Context_11	TCTACAGTCCGACGATCATTGAGGAGAGAAGAGAGCAGCCTTAGTTTGGTTCTGGCAAAAAATAGAATGTACCTCTGTTGAGGTGTTGGATTCTTGCAAGAGAGTGGCCCATTATTTACCTCGGTTATGGAGGTAAATCAGTTAACTCTTGAGGAGGCATAGTTACCAATGCCCTGGCTCTGCCCTGG
8mer-w6			left	Context_11	TCTACAGTCCGACGATCATTGAGGAGAGAAGAGAGCAGCCTTAGTTTGGTTCTGGCAAAAAATAGAATCTGCCTCAGTTGAGGTGTTGGATTCTTGCAAGAGAGTGGCCCATTATTAAGCACGGTTATGGAGGTAAATCAGTTAACTCTTGAGGAGGCATAGTTACCAATGCCCTGGCTCTGCCCTGG
8mer-w6			right	Context_11	TCTACAGTCCGACGATCATTGAGGAGAGAAGAGAGCAGCCTTAGTTTGGTTCTGGCAAAAAATAGAATGGCAATTTGTTGAGGTGTTGGATTCTTGCAAGAGAGTGGCCCATTATCTGCCTCAGTTATGGAGGTAAATCAGTTAACTCTTGAGGAGGCATAGTTACCAATGCCCTGGCTCTGCCCTGG
8mer-w6			dual	Context_11	TCTACAGTCCGACGATCATTGAGGAGAGAAGAGAGCAGCCTTAGTTTGGTTCTGGCAAAAAATAGAATCTGCCTCAGTTGAGGTGTTGGATTCTTGCAAGAGAGTGGCCCATTATCTGCCTCAGTTATGGAGGTAAATCAGTTAACTCTTGAGGAGGCATAGTTACCAATGCCCTGGCTCTGCCCTGG
8mer-w6	4mer-m13.16		left	Context_11	TCTACAGTCCGACGATCATTGAGGAGAGAAGAGAGCAGCCTTAGTTTGGTTCTGGCAAAAACAAGAATCTGCCTCAGTTGAGGTGTTGGATTCTTGCAAGAGAGTGGCCCATTATTAAGCACGGTTATGGAGGTAAATCAGTTAACTCTTGAGGAGGCATAGTTACCAATGCCCTGGCTCTGCCCTGG
8mer-w6	4mer-m13.16		right	Context_11	TCTACAGTCCGACGATCATTGAGGAGAGAAGAGAGCAGCCTTAGTTTGGTTCTGGCAAAAAATAGAATGGCAATTTGTTGAGGTGTTGGATTCTTGCAAGAGAGTGGACAATTATCTGCCTCAGTTATGGAGGTAAATCAGTTAACTCTTGAGGAGGCATAGTTACCAATGCCCTGGCTCTGCCCTGG
8mer-w6	4mer-m13.16		dual	Context_11	TCTACAGTCCGACGATCATTGAGGAGAGAAGAGAGCAGCCTTAGTTTGGTTCTGGCAAAAACAAGAATCTGCCTCAGTTGAGGTGTTGGATTCTTGCAAGAGAGTGGACAATTATCTGCCTCAGTTATGGAGGTAAATCAGTTAACTCTTGAGGAGGCATAGTTACCAATGCCCTGGCTCTGCCCTGG
8mer-w6	4mer-m13.16	A	left	Context_11	TCTACAGTCCGACGATCATTGAGGAGAGAAGAGAGCAGCCTTAGTTTGGTTCTGGCAAAAACAAGAAATCTGCCTCAGTTGAGGTGTTGGATTCTTGCAAGAGAGTGGCCCATTATTAAGCACGGTTATGGAGGTAAATCAGTTAACTCTTGAGGAGGCATAGTTACCAATGCCCTGGCTCTGCCCTG
8mer-w6	4mer-m13.16	A	right	Context_11	TCTACAGTCCGACGATCATTGAGGAGAGAAGAGAGCAGCCTTAGTTTGGTTCTGGCAAAAAATAGAATGGCAATTTGTTGAGGTGTTGGATTCTTGCAAGAGAGTGGACAATTAATCTGCCTCAGTTATGGAGGTAAATCAGTTAACTCTTGAGGAGGCATAGTTACCAATGCCCTGGCTCTGCCCTG
8mer-w6	4mer-m13.16	A	dual	Context_11	TCTACAGTCCGACGATCATTGAGGAGAGAAGAGAGCAGCCTTAGTTTGGTTCTGGCAAAAACAAGAAATCTGCCTCAGTTGAGGTGTTGGATTCTTGCAAGAGAGTGGACAATTAATCTGCCTCAGTTATGGAGGTAAATCAGTTAACTCTTGAGGAGGCATAGTTACCAATGCCCTGGCTCTGCCCT
8mer-w6	4mer-m13.16	AAAA	left	Context_11	TCTACAGTCCGACGATCATTGAGGAGAGAAGAGAGCAGCCTTAGTTTGGTTCTGGCAAAAACAAGAAAAAATCTGCCTCAGTTGAGGTGTTGGATTCTTGCAAGAGAGTGGCCCATTATTAAGCACGGTTATGGAGGTAAATCAGTTAACTCTTGAGGAGGCATAGTTACCAATGCCCTGGCTCTGCC
8mer-w6	4mer-m13.16	AAAA	right	Context_11	TCTACAGTCCGACGATCATTGAGGAGAGAAGAGAGCAGCCTTAGTTTGGTTCTGGCAAAAAATAGAATGGCAATTTGTTGAGGTGTTGGATTCTTGCAAGAGAGTGGACAATTAAAAATCTGCCTCAGTTATGGAGGTAAATCAGTTAACTCTTGAGGAGGCATAGTTACCAATGCCCTGGCTCTGCC
8mer-w6	4mer-m13.16	AAAA	dual	Context_11	TCTACAGTCCGACGATCATTGAGGAGAGAAGAGAGCAGCCTTAGTTTGGTTCTGGCAAAAACAAGAAAAAATCTGCCTCAGTTGAGGTGTTGGATTCTTGCAAGAGAGTGGACAATTAAAAATCTGCCTCAGTTATGGAGGTAAATCAGTTAACTCTTGAGGAGGCATAGTTACCAATGCCCTGGCTC
8mer-w6	4mer-m13.16	T	left	Context_11	TCTACAGTCCGACGATCATTGAGGAGAGAAGAGAGCAGCCTTAGTTTGGTTCTGGCAAAAACAAGAATTCTGCCTCAGTTGAGGTGTTGGATTCTTGCAAGAGAGTGGCCCATTATTAAGCACGGTTATGGAGGTAAATCAGTTAACTCTTGAGGAGGCATAGTTACCAATGCCCTGGCTCTGCCCTG
8mer-w6	4mer-m13.16	T	right	Context_11	TCTACAGTCCGACGATCATTGAGGAGAGAAGAGAGCAGCCTTAGTTTGGTTCTGGCAAAAAATAGAATGGCAATTTGTTGAGGTGTTGGATTCTTGCAAGAGAGTGGACAATTATTCTGCCTCAGTTATGGAGGTAAATCAGTTAACTCTTGAGGAGGCATAGTTACCAATGCCCTGGCTCTGCCCTG
8mer-w6	4mer-m13.16	T	dual	Context_11	TCTACAGTCCGACGATCATTGAGGAGAGAAGAGAGCAGCCTTAGTTTGGTTCTGGCAAAAACAAGAATTCTGCCTCAGTTGAGGTGTTGGATTCTTGCAAGAGAGTGGACAATTATTCTGCCTCAGTTATGGAGGTAAATCAGTTAACTCTTGAGGAGGCATAGTTACCAATGCCCTGGCTCTGCCCT
8mer-w6	4mer-m13.16	TTTT	left	Context_11	TCTACAGTCCGACGATCATTGAGGAGAGAAGAGAGCAGCCTTAGTTTGGTTCTGGCAAAAACAAGAATTTTTCTGCCTCAGTTGAGGTGTTGGATTCTTGCAAGAGAGTGGCCCATTATTAAGCACGGTTATGGAGGTAAATCAGTTAACTCTTGAGGAGGCATAGTTACCAATGCCCTGGCTCTGCC
8mer-w6	4mer-m13.16	TTTT	right	Context_11	TCTACAGTCCGACGATCATTGAGGAGAGAAGAGAGCAGCCTTAGTTTGGTTCTGGCAAAAAATAGAATGGCAATTTGTTGAGGTGTTGGATTCTTGCAAGAGAGTGGACAATTATTTTTCTGCCTCAGTTATGGAGGTAAATCAGTTAACTCTTGAGGAGGCATAGTTACCAATGCCCTGGCTCTGCC
8mer-w6	4mer-m13.16	TTTT	dual	Context_11	TCTACAGTCCGACGATCATTGAGGAGAGAAGAGAGCAGCCTTAGTTTGGTTCTGGCAAAAACAAGAATTTTTCTGCCTCAGTTGAGGTGTTGGATTCTTGCAAGAGAGTGGACAATTATTTTTCTGCCTCAGTTATGGAGGTAAATCAGTTAACTCTTGAGGAGGCATAGTTACCAATGCCCTGGCTC
8mer-w6	9mer-m11.19		left	Context_11	TCTACAGTCCGACGATCATTGAGGAGAGAAGAGAGCAGCCTTAGTTTGGTTCTGGCATATACAACCATCTGCCTCAGTTGAGGTGTTGGATTCTTGCAAGAGAGTGGCCCATTATTAAGCACGGTTATGGAGGTAAATCAGTTAACTCTTGAGGAGGCATAGTTACCAATGCCCTGGCTCTGCCCTGG
8mer-w6	9mer-m11.19		right	Context_11	TCTACAGTCCGACGATCATTGAGGAGAGAAGAGAGCAGCCTTAGTTTGGTTCTGGCAAAAAATAGAATGGCAATTTGTTGAGGTGTTGGATTCTTGCAAGAGAGTATACAACCATCTGCCTCAGTTATGGAGGTAAATCAGTTAACTCTTGAGGAGGCATAGTTACCAATGCCCTGGCTCTGCCCTGG
8mer-w6	9mer-m11.19		dual	Context_11	TCTACAGTCCGACGATCATTGAGGAGAGAAGAGAGCAGCCTTAGTTTGGTTCTGGCATATACAACCATCTGCCTCAGTTGAGGTGTTGGATTCTTGCAAGAGAGTATACAACCATCTGCCTCAGTTATGGAGGTAAATCAGTTAACTCTTGAGGAGGCATAGTTACCAATGCCCTGGCTCTGCCCTGG
8mer-w6	9mer-m11.19	A	left	Context_11	TCTACAGTCCGACGATCATTGAGGAGAGAAGAGAGCAGCCTTAGTTTGGTTCTGGCATATACAACCAATCTGCCTCAGTTGAGGTGTTGGATTCTTGCAAGAGAGTGGCCCATTATTAAGCACGGTTATGGAGGTAAATCAGTTAACTCTTGAGGAGGCATAGTTACCAATGCCCTGGCTCTGCCCTG
8mer-w6	9mer-m11.19	A	right	Context_11	TCTACAGTCCGACGATCATTGAGGAGAGAAGAGAGCAGCCTTAGTTTGGTTCTGGCAAAAAATAGAATGGCAATTTGTTGAGGTGTTGGATTCTTGCAAGAGAGTATACAACCAATCTGCCTCAGTTATGGAGGTAAATCAGTTAACTCTTGAGGAGGCATAGTTACCAATGCCCTGGCTCTGCCCTG
8mer-w6	9mer-m11.19	A	dual	Context_11	TCTACAGTCCGACGATCATTGAGGAGAGAAGAGAGCAGCCTTAGTTTGGTTCTGGCATATACAACCAATCTGCCTCAGTTGAGGTGTTGGATTCTTGCAAGAGAGTATACAACCAATCTGCCTCAGTTATGGAGGTAAATCAGTTAACTCTTGAGGAGGCATAGTTACCAATGCCCTGGCTCTGCCCT
8mer-w6	9mer-m11.19	AAAA	left	Context_11	TCTACAGTCCGACGATCATTGAGGAGAGAAGAGAGCAGCCTTAGTTTGGTTCTGGCATATACAACCAAAAATCTGCCTCAGTTGAGGTGTTGGATTCTTGCAAGAGAGTGGCCCATTATTAAGCACGGTTATGGAGGTAAATCAGTTAACTCTTGAGGAGGCATAGTTACCAATGCCCTGGCTCTGCC
8mer-w6	9mer-m11.19	AAAA	right	Context_11	TCTACAGTCCGACGATCATTGAGGAGAGAAGAGAGCAGCCTTAGTTTGGTTCTGGCAAAAAATAGAATGGCAATTTGTTGAGGTGTTGGATTCTTGCAAGAGAGTATACAACCAAAAATCTGCCTCAGTTATGGAGGTAAATCAGTTAACTCTTGAGGAGGCATAGTTACCAATGCCCTGGCTCTGCC
8mer-w6	9mer-m11.19	AAAA	dual	Context_11	TCTACAGTCCGACGATCATTGAGGAGAGAAGAGAGCAGCCTTAGTTTGGTTCTGGCATATACAACCAAAAATCTGCCTCAGTTGAGGTGTTGGATTCTTGCAAGAGAGTATACAACCAAAAATCTGCCTCAGTTATGGAGGTAAATCAGTTAACTCTTGAGGAGGCATAGTTACCAATGCCCTGGCTC
8mer-w6	9mer-m11.19	T	left	Context_11	TCTACAGTCCGACGATCATTGAGGAGAGAAGAGAGCAGCCTTAGTTTGGTTCTGGCATATACAACCATTCTGCCTCAGTTGAGGTGTTGGATTCTTGCAAGAGAGTGGCCCATTATTAAGCACGGTTATGGAGGTAAATCAGTTAACTCTTGAGGAGGCATAGTTACCAATGCCCTGGCTCTGCCCTG
8mer-w6	9mer-m11.19	T	right	Context_11	TCTACAGTCCGACGATCATTGAGGAGAGAAGAGAGCAGCCTTAGTTTGGTTCTGGCAAAAAATAGAATGGCAATTTGTTGAGGTGTTGGATTCTTGCAAGAGAGTATACAACCATTCTGCCTCAGTTATGGAGGTAAATCAGTTAACTCTTGAGGAGGCATAGTTACCAATGCCCTGGCTCTGCCCTG
8mer-w6	9mer-m11.19	T	dual	Context_11	TCTACAGTCCGACGATCATTGAGGAGAGAAGAGAGCAGCCTTAGTTTGGTTCTGGCATATACAACCATTCTGCCTCAGTTGAGGTGTTGGATTCTTGCAAGAGAGTATACAACCATTCTGCCTCAGTTATGGAGGTAAATCAGTTAACTCTTGAGGAGGCATAGTTACCAATGCCCTGGCTCTGCCCT
8mer-w6	9mer-m11.19	TTTT	left	Context_11	TCTACAGTCCGACGATCATTGAGGAGAGAAGAGAGCAGCCTTAGTTTGGTTCTGGCATATACAACCATTTTTCTGCCTCAGTTGAGGTGTTGGATTCTTGCAAGAGAGTGGCCCATTATTAAGCACGGTTATGGAGGTAAATCAGTTAACTCTTGAGGAGGCATAGTTACCAATGCCCTGGCTCTGCC
8mer-w6	9mer-m11.19	TTTT	right	Context_11	TCTACAGTCCGACGATCATTGAGGAGAGAAGAGAGCAGCCTTAGTTTGGTTCTGGCAAAAAATAGAATGGCAATTTGTTGAGGTGTTGGATTCTTGCAAGAGAGTATACAACCATTTTTCTGCCTCAGTTATGGAGGTAAATCAGTTAACTCTTGAGGAGGCATAGTTACCAATGCCCTGGCTCTGCC
8mer-w6	9mer-m11.19	TTTT	dual	Context_11	TCTACAGTCCGACGATCATTGAGGAGAGAAGAGAGCAGCCTTAGTTTGGTTCTGGCATATACAACCATTTTTCTGCCTCAGTTGAGGTGTTGGATTCTTGCAAGAGAGTATACAACCATTTTTCTGCCTCAGTTATGGAGGTAAATCAGTTAACTCTTGAGGAGGCATAGTTACCAATGCCCTGGCTC
8mer-w6	9mer-m13.21		left	Context_11	TCTACAGTCCGACGATCATTGAGGAGAGAAGAGAGCAGCCTTAGTTTGGTTCTGGACTATACAAGAATCTGCCTCAGTTGAGGTGTTGGATTCTTGCAAGAGAGTGGCCCATTATTAAGCACGGTTATGGAGGTAAATCAGTTAACTCTTGAGGAGGCATAGTTACCAATGCCCTGGCTCTGCCCTGG
8mer-w6	9mer-m13.21		right	Context_11	TCTACAGTCCGACGATCATTGAGGAGAGAAGAGAGCAGCCTTAGTTTGGTTCTGGCAAAAAATAGAATGGCAATTTGTTGAGGTGTTGGATTCTTGCAAGAGACTATACAATTATCTGCCTCAGTTATGGAGGTAAATCAGTTAACTCTTGAGGAGGCATAGTTACCAATGCCCTGGCTCTGCCCTGG
8mer-w6	9mer-m13.21		dual	Context_11	TCTACAGTCCGACGATCATTGAGGAGAGAAGAGAGCAGCCTTAGTTTGGTTCTGGACTATACAAGAATCTGCCTCAGTTGAGGTGTTGGATTCTTGCAAGAGACTATACAATTATCTGCCTCAGTTATGGAGGTAAATCAGTTAACTCTTGAGGAGGCATAGTTACCAATGCCCTGGCTCTGCCCTGG
8mer-w6	9mer-m13.21	A	left	Context_11	TCTACAGTCCGACGATCATTGAGGAGAGAAGAGAGCAGCCTTAGTTTGGTTCTGGACTATACAAGAAATCTGCCTCAGTTGAGGTGTTGGATTCTTGCAAGAGAGTGGCCCATTATTAAGCACGGTTATGGAGGTAAATCAGTTAACTCTTGAGGAGGCATAGTTACCAATGCCCTGGCTCTGCCCTG
8mer-w6	9mer-m13.21	A	right	Context_11	TCTACAGTCCGACGATCATTGAGGAGAGAAGAGAGCAGCCTTAGTTTGGTTCTGGCAAAAAATAGAATGGCAATTTGTTGAGGTGTTGGATTCTTGCAAGAGACTATACAATTAATCTGCCTCAGTTATGGAGGTAAATCAGTTAACTCTTGAGGAGGCATAGTTACCAATGCCCTGGCTCTGCCCTG
8mer-w6	9mer-m13.21	A	dual	Context_11	TCTACAGTCCGACGATCATTGAGGAGAGAAGAGAGCAGCCTTAGTTTGGTTCTGGACTATACAAGAAATCTGCCTCAGTTGAGGTGTTGGATTCTTGCAAGAGACTATACAATTAATCTGCCTCAGTTATGGAGGTAAATCAGTTAACTCTTGAGGAGGCATAGTTACCAATGCCCTGGCTCTGCCCT
8mer-w6	9mer-m13.21	AAAA	left	Context_11	TCTACAGTCCGACGATCATTGAGGAGAGAAGAGAGCAGCCTTAGTTTGGTTCTGGACTATACAAGAAAAAATCTGCCTCAGTTGAGGTGTTGGATTCTTGCAAGAGAGTGGCCCATTATTAAGCACGGTTATGGAGGTAAATCAGTTAACTCTTGAGGAGGCATAGTTACCAATGCCCTGGCTCTGCC
8mer-w6	9mer-m13.21	AAAA	right	Context_11	TCTACAGTCCGACGATCATTGAGGAGAGAAGAGAGCAGCCTTAGTTTGGTTCTGGCAAAAAATAGAATGGCAATTTGTTGAGGTGTTGGATTCTTGCAAGAGACTATACAATTAAAAATCTGCCTCAGTTATGGAGGTAAATCAGTTAACTCTTGAGGAGGCATAGTTACCAATGCCCTGGCTCTGCC
8mer-w6	9mer-m13.21	AAAA	dual	Context_11	TCTACAGTCCGACGATCATTGAGGAGAGAAGAGAGCAGCCTTAGTTTGGTTCTGGACTATACAAGAAAAAATCTGCCTCAGTTGAGGTGTTGGATTCTTGCAAGAGACTATACAATTAAAAATCTGCCTCAGTTATGGAGGTAAATCAGTTAACTCTTGAGGAGGCATAGTTACCAATGCCCTGGCTC
8mer-w6	9mer-m13.21	T	left	Context_11	TCTACAGTCCGACGATCATTGAGGAGAGAAGAGAGCAGCCTTAGTTTGGTTCTGGACTATACAAGAATTCTGCCTCAGTTGAGGTGTTGGATTCTTGCAAGAGAGTGGCCCATTATTAAGCACGGTTATGGAGGTAAATCAGTTAACTCTTGAGGAGGCATAGTTACCAATGCCCTGGCTCTGCCCTG
8mer-w6	9mer-m13.21	T	right	Context_11	TCTACAGTCCGACGATCATTGAGGAGAGAAGAGAGCAGCCTTAGTTTGGTTCTGGCAAAAAATAGAATGGCAATTTGTTGAGGTGTTGGATTCTTGCAAGAGACTATACAATTATTCTGCCTCAGTTATGGAGGTAAATCAGTTAACTCTTGAGGAGGCATAGTTACCAATGCCCTGGCTCTGCCCTG
8mer-w6	9mer-m13.21	T	dual	Context_11	TCTACAGTCCGACGATCATTGAGGAGAGAAGAGAGCAGCCTTAGTTTGGTTCTGGACTATACAAGAATTCTGCCTCAGTTGAGGTGTTGGATTCTTGCAAGAGACTATACAATTATTCTGCCTCAGTTATGGAGGTAAATCAGTTAACTCTTGAGGAGGCATAGTTACCAATGCCCTGGCTCTGCCCT
8mer-w6	9mer-m13.21	TTTT	left	Context_11	TCTACAGTCCGACGATCATTGAGGAGAGAAGAGAGCAGCCTTAGTTTGGTTCTGGACTATACAAGAATTTTTCTGCCTCAGTTGAGGTGTTGGATTCTTGCAAGAGAGTGGCCCATTATTAAGCACGGTTATGGAGGTAAATCAGTTAACTCTTGAGGAGGCATAGTTACCAATGCCCTGGCTCTGCC
8mer-w6	9mer-m13.21	TTTT	right	Context_11	TCTACAGTCCGACGATCATTGAGGAGAGAAGAGAGCAGCCTTAGTTTGGTTCTGGCAAAAAATAGAATGGCAATTTGTTGAGGTGTTGGATTCTTGCAAGAGACTATACAATTATTTTTCTGCCTCAGTTATGGAGGTAAATCAGTTAACTCTTGAGGAGGCATAGTTACCAATGCCCTGGCTCTGCC
8mer-w6	9mer-m13.21	TTTT	dual	Context_11	TCTACAGTCCGACGATCATTGAGGAGAGAAGAGAGCAGCCTTAGTTTGGTTCTGGACTATACAAGAATTTTTCTGCCTCAGTTGAGGTGTTGGATTCTTGCAAGAGACTATACAATTATTTTTCTGCCTCAGTTATGGAGGTAAATCAGTTAACTCTTGAGGAGGCATAGTTACCAATGCCCTGGCTC
No_site_0				Context_11	TCTACAGTCCGACGATCATTGAGGAGAGAAGAGAGCAGCCTTAGTTTGGTTCTGGCAAAAAATAGAATGGCAATTTGTTGAGGTGTTGGATTCTTGCAAGAGAGTGGCCCATTATTAAGCACGGTTATGGAGGTAAATCAGTTAACTCTTGAGGAGGCATAGTTACCAATGCCCTGGCTCTGCCCTGG
No_site_1				Context_11	TCTACAGTCCGACGATCATTGAGGAGAGAAGAGAGCAGCCTTAGTTTGGTTCTGGCTTCAAAAGTATATCTCCAGTGTTGAGGTGTTGGATTCTTGCAAGAGACTGAGATTTAACCATGGACCGTTATGGAGGTAAATCAGTTAACTCTTGAGGAGGCATAGTTACCAATGCCCTGGCTCTGCCCTGG
No_site_2				Context_11	TCTACAGTCCGACGATCATTGAGGAGAGAAGAGAGCAGCCTTAGTTTGGTTCTGGCTGGCTTGAAATTGCCCCAGGGTTGAGGTGTTGGATTCTTGCAAGAGAATATGCTTGCCCATTGGGCTGTTATGGAGGTAAATCAGTTAACTCTTGAGGAGGCATAGTTACCAATGCCCTGGCTCTGCCCTGG
No_site_3				Context_11	TCTACAGTCCGACGATCATTGAGGAGAGAAGAGAGCAGCCTTAGTTTGGTTCTGGCCAGATCTTATTTATAGTGCAGTTGAGGTGTTGGATTCTTGCAAGAGAATTGGTTAACAGGCCTGGGAGTTATGGAGGTAAATCAGTTAACTCTTGAGGAGGCATAGTTACCAATGCCCTGGCTCTGCCCTGG
No_site_4				Context_11	TCTACAGTCCGACGATCATTGAGGAGAGAAGAGAGCAGCCTTAGTTTGGTTCTGGCTCATGGCAAAAAACCATACCGTTGAGGTGTTGGATTCTTGCAAGAGACCAGTATAGGCCATAAACAAGTTATGGAGGTAAATCAGTTAACTCTTGAGGAGGCATAGTTACCAATGCCCTGGCTCTGCCCTGG
No_site_5				Context_11	TCTACAGTCCGACGATCATTGAGGAGAGAAGAGAGCAGCCTTAGTTTGGTTCTGGCTAATGGGAAAATTGAATGTGGTTGAGGTGTTGGATTCTTGCAAGAGAGTGGAGATTTTCTGTGTTTTGTTATGGAGGTAAATCAGTTAACTCTTGAGGAGGCATAGTTACCAATGCCCTGGCTCTGCCCTGG
No_site_6				Context_11	TCTACAGTCCGACGATCATTGAGGAGAGAAGAGAGCAGCCTTAGTTTGGTTCTGGCAATTTCCGAATTAGAAAGAGGTTGAGGTGTTGGATTCTTGCAAGAGAGAAGGATTTGCTTGTAGATGGTTATGGAGGTAAATCAGTTAACTCTTGAGGAGGCATAGTTACCAATGCCCTGGCTCTGCCCTGG
lin-41	9mer-m11.19	T	dual	Context_12	TCTACAGTCCGACGATCAATCATACCATACGCTTTTCAGCAACTGGAACCATTTTATTATACAACCATTCTACACTCATTTTGCTATGATGGGTAAAAGGAGACAATATACAACCATTCTGCCTCGGGTGATCCCAATCTGGAGAAACCATAAATAGTTACGACGTTACCAATGCCCTGGCTCTGCCC
8mer			left	Context_12	TCTACAGTCCGACGATCAATCATACCATACGCTTTTCAGCAACTGGAACCATTTTATAAGTGCTGTATCTACCTCATTTTGCTATGATGGGTAAAAGGAGACAAAAAGATCTTATGGGCGTAGGGTGATCCCAATCTGGAGAAACCATAAATAGTTACGACGTTACCAATGCCCTGGCTCTGCCCTGG
8mer			right	Context_12	TCTACAGTCCGACGATCAATCATACCATACGCTTTTCAGCAACTGGAACCATTTTATAAGTGCTGTATGTTGCTCTTTTTGCTATGATGGGTAAAAGGAGACAAAAAGATCTTATCTACCTCAGGTGATCCCAATCTGGAGAAACCATAAATAGTTACGACGTTACCAATGCCCTGGCTCTGCCCTGG
8mer			dual	Context_12	TCTACAGTCCGACGATCAATCATACCATACGCTTTTCAGCAACTGGAACCATTTTATAAGTGCTGTATCTACCTCATTTTGCTATGATGGGTAAAAGGAGACAAAAAGATCTTATCTACCTCAGGTGATCCCAATCTGGAGAAACCATAAATAGTTACGACGTTACCAATGCCCTGGCTCTGCCCTGG
7mer-m8			left	Context_12	TCTACAGTCCGACGATCAATCATACCATACGCTTTTCAGCAACTGGAACCATTTTATAAGTGCTGTATCTACCTCTTTTTGCTATGATGGGTAAAAGGAGACAAAAAGATCTTATGGGCGTAGGGTGATCCCAATCTGGAGAAACCATAAATAGTTACGACGTTACCAATGCCCTGGCTCTGCCCTGG
7mer-m8			right	Context_12	TCTACAGTCCGACGATCAATCATACCATACGCTTTTCAGCAACTGGAACCATTTTATAAGTGCTGTATGTTGCTCTTTTTGCTATGATGGGTAAAAGGAGACAAAAAGATCTTATCTACCTCGGGTGATCCCAATCTGGAGAAACCATAAATAGTTACGACGTTACCAATGCCCTGGCTCTGCCCTGG
7mer-m8			dual	Context_12	TCTACAGTCCGACGATCAATCATACCATACGCTTTTCAGCAACTGGAACCATTTTATAAGTGCTGTATCTACCTCTTTTTGCTATGATGGGTAAAAGGAGACAAAAAGATCTTATCTACCTCGGGTGATCCCAATCTGGAGAAACCATAAATAGTTACGACGTTACCAATGCCCTGGCTCTGCCCTGG
7mer-A1			left	Context_12	TCTACAGTCCGACGATCAATCATACCATACGCTTTTCAGCAACTGGAACCATTTTATAAGTGCTGTATGTACCTCATTTTGCTATGATGGGTAAAAGGAGACAAAAAGATCTTATGGGCGTAGGGTGATCCCAATCTGGAGAAACCATAAATAGTTACGACGTTACCAATGCCCTGGCTCTGCCCTGG
7mer-A1			right	Context_12	TCTACAGTCCGACGATCAATCATACCATACGCTTTTCAGCAACTGGAACCATTTTATAAGTGCTGTATGTTGCTCTTTTTGCTATGATGGGTAAAAGGAGACAAAAAGATCTTATGTACCTCAGGTGATCCCAATCTGGAGAAACCATAAATAGTTACGACGTTACCAATGCCCTGGCTCTGCCCTGG
7mer-A1			dual	Context_12	TCTACAGTCCGACGATCAATCATACCATACGCTTTTCAGCAACTGGAACCATTTTATAAGTGCTGTATGTACCTCATTTTGCTATGATGGGTAAAAGGAGACAAAAAGATCTTATGTACCTCAGGTGATCCCAATCTGGAGAAACCATAAATAGTTACGACGTTACCAATGCCCTGGCTCTGCCCTGG
6mer			left	Context_12	TCTACAGTCCGACGATCAATCATACCATACGCTTTTCAGCAACTGGAACCATTTTATAAGTGCTGTATGTACCTCTTTTTGCTATGATGGGTAAAAGGAGACAAAAAGATCTTATGGGCGTAGGGTGATCCCAATCTGGAGAAACCATAAATAGTTACGACGTTACCAATGCCCTGGCTCTGCCCTGG
6mer			right	Context_12	TCTACAGTCCGACGATCAATCATACCATACGCTTTTCAGCAACTGGAACCATTTTATAAGTGCTGTATGTTGCTCTTTTTGCTATGATGGGTAAAAGGAGACAAAAAGATCTTATGTACCTCGGGTGATCCCAATCTGGAGAAACCATAAATAGTTACGACGTTACCAATGCCCTGGCTCTGCCCTGG
6mer			dual	Context_12	TCTACAGTCCGACGATCAATCATACCATACGCTTTTCAGCAACTGGAACCATTTTATAAGTGCTGTATGTACCTCTTTTTGCTATGATGGGTAAAAGGAGACAAAAAGATCTTATGTACCTCGGGTGATCCCAATCTGGAGAAACCATAAATAGTTACGACGTTACCAATGCCCTGGCTCTGCCCTGG
8mer-w6			left	Context_12	TCTACAGTCCGACGATCAATCATACCATACGCTTTTCAGCAACTGGAACCATTTTATAAGTGCTGTATCTGCCTCATTTTGCTATGATGGGTAAAAGGAGACAAAAAGATCTTATGGGCGTAGGGTGATCCCAATCTGGAGAAACCATAAATAGTTACGACGTTACCAATGCCCTGGCTCTGCCCTGG
8mer-w6			right	Context_12	TCTACAGTCCGACGATCAATCATACCATACGCTTTTCAGCAACTGGAACCATTTTATAAGTGCTGTATGTTGCTCTTTTTGCTATGATGGGTAAAAGGAGACAAAAAGATCTTATCTGCCTCAGGTGATCCCAATCTGGAGAAACCATAAATAGTTACGACGTTACCAATGCCCTGGCTCTGCCCTGG
8mer-w6			dual	Context_12	TCTACAGTCCGACGATCAATCATACCATACGCTTTTCAGCAACTGGAACCATTTTATAAGTGCTGTATCTGCCTCATTTTGCTATGATGGGTAAAAGGAGACAAAAAGATCTTATCTGCCTCAGGTGATCCCAATCTGGAGAAACCATAAATAGTTACGACGTTACCAATGCCCTGGCTCTGCCCTGG
8mer-w6	4mer-m13.16		left	Context_12	TCTACAGTCCGACGATCAATCATACCATACGCTTTTCAGCAACTGGAACCATTTTATAAGACAAGTATCTGCCTCATTTTGCTATGATGGGTAAAAGGAGACAAAAAGATCTTATGGGCGTAGGGTGATCCCAATCTGGAGAAACCATAAATAGTTACGACGTTACCAATGCCCTGGCTCTGCCCTGG
8mer-w6	4mer-m13.16		right	Context_12	TCTACAGTCCGACGATCAATCATACCATACGCTTTTCAGCAACTGGAACCATTTTATAAGTGCTGTATGTTGCTCTTTTTGCTATGATGGGTAAAAGGAGACAAAAAACAATTATCTGCCTCAGGTGATCCCAATCTGGAGAAACCATAAATAGTTACGACGTTACCAATGCCCTGGCTCTGCCCTGG
8mer-w6	4mer-m13.16		dual	Context_12	TCTACAGTCCGACGATCAATCATACCATACGCTTTTCAGCAACTGGAACCATTTTATAAGACAAGTATCTGCCTCATTTTGCTATGATGGGTAAAAGGAGACAAAAAACAATTATCTGCCTCAGGTGATCCCAATCTGGAGAAACCATAAATAGTTACGACGTTACCAATGCCCTGGCTCTGCCCTGG
8mer-w6	4mer-m13.16	A	left	Context_12	TCTACAGTCCGACGATCAATCATACCATACGCTTTTCAGCAACTGGAACCATTTTATAAGACAAGTAATCTGCCTCATTTTGCTATGATGGGTAAAAGGAGACAAAAAGATCTTATGGGCGTAGGGTGATCCCAATCTGGAGAAACCATAAATAGTTACGACGTTACCAATGCCCTGGCTCTGCCCTG
8mer-w6	4mer-m13.16	A	right	Context_12	TCTACAGTCCGACGATCAATCATACCATACGCTTTTCAGCAACTGGAACCATTTTATAAGTGCTGTATGTTGCTCTTTTTGCTATGATGGGTAAAAGGAGACAAAAAACAATTAATCTGCCTCAGGTGATCCCAATCTGGAGAAACCATAAATAGTTACGACGTTACCAATGCCCTGGCTCTGCCCTG
8mer-w6	4mer-m13.16	A	dual	Context_12	TCTACAGTCCGACGATCAATCATACCATACGCTTTTCAGCAACTGGAACCATTTTATAAGACAAGTAATCTGCCTCATTTTGCTATGATGGGTAAAAGGAGACAAAAAACAATTAATCTGCCTCAGGTGATCCCAATCTGGAGAAACCATAAATAGTTACGACGTTACCAATGCCCTGGCTCTGCCCT
8mer-w6	4mer-m13.16	AAAA	left	Context_12	TCTACAGTCCGACGATCAATCATACCATACGCTTTTCAGCAACTGGAACCATTTTATAAGACAAGTAAAAATCTGCCTCATTTTGCTATGATGGGTAAAAGGAGACAAAAAGATCTTATGGGCGTAGGGTGATCCCAATCTGGAGAAACCATAAATAGTTACGACGTTACCAATGCCCTGGCTCTGCC
8mer-w6	4mer-m13.16	AAAA	right	Context_12	TCTACAGTCCGACGATCAATCATACCATACGCTTTTCAGCAACTGGAACCATTTTATAAGTGCTGTATGTTGCTCTTTTTGCTATGATGGGTAAAAGGAGACAAAAAACAATTAAAAATCTGCCTCAGGTGATCCCAATCTGGAGAAACCATAAATAGTTACGACGTTACCAATGCCCTGGCTCTGCC
8mer-w6	4mer-m13.16	AAAA	dual	Context_12	TCTACAGTCCGACGATCAATCATACCATACGCTTTTCAGCAACTGGAACCATTTTATAAGACAAGTAAAAATCTGCCTCATTTTGCTATGATGGGTAAAAGGAGACAAAAAACAATTAAAAATCTGCCTCAGGTGATCCCAATCTGGAGAAACCATAAATAGTTACGACGTTACCAATGCCCTGGCTC
8mer-w6	4mer-m13.16	T	left	Context_12	TCTACAGTCCGACGATCAATCATACCATACGCTTTTCAGCAACTGGAACCATTTTATAAGACAAGTATTCTGCCTCATTTTGCTATGATGGGTAAAAGGAGACAAAAAGATCTTATGGGCGTAGGGTGATCCCAATCTGGAGAAACCATAAATAGTTACGACGTTACCAATGCCCTGGCTCTGCCCTG
8mer-w6	4mer-m13.16	T	right	Context_12	TCTACAGTCCGACGATCAATCATACCATACGCTTTTCAGCAACTGGAACCATTTTATAAGTGCTGTATGTTGCTCTTTTTGCTATGATGGGTAAAAGGAGACAAAAAACAATTATTCTGCCTCAGGTGATCCCAATCTGGAGAAACCATAAATAGTTACGACGTTACCAATGCCCTGGCTCTGCCCTG
8mer-w6	4mer-m13.16	T	dual	Context_12	TCTACAGTCCGACGATCAATCATACCATACGCTTTTCAGCAACTGGAACCATTTTATAAGACAAGTATTCTGCCTCATTTTGCTATGATGGGTAAAAGGAGACAAAAAACAATTATTCTGCCTCAGGTGATCCCAATCTGGAGAAACCATAAATAGTTACGACGTTACCAATGCCCTGGCTCTGCCCT
8mer-w6	4mer-m13.16	TTTT	left	Context_12	TCTACAGTCCGACGATCAATCATACCATACGCTTTTCAGCAACTGGAACCATTTTATAAGACAAGTATTTTTCTGCCTCATTTTGCTATGATGGGTAAAAGGAGACAAAAAGATCTTATGGGCGTAGGGTGATCCCAATCTGGAGAAACCATAAATAGTTACGACGTTACCAATGCCCTGGCTCTGCC
8mer-w6	4mer-m13.16	TTTT	right	Context_12	TCTACAGTCCGACGATCAATCATACCATACGCTTTTCAGCAACTGGAACCATTTTATAAGTGCTGTATGTTGCTCTTTTTGCTATGATGGGTAAAAGGAGACAAAAAACAATTATTTTTCTGCCTCAGGTGATCCCAATCTGGAGAAACCATAAATAGTTACGACGTTACCAATGCCCTGGCTCTGCC
8mer-w6	4mer-m13.16	TTTT	dual	Context_12	TCTACAGTCCGACGATCAATCATACCATACGCTTTTCAGCAACTGGAACCATTTTATAAGACAAGTATTTTTCTGCCTCATTTTGCTATGATGGGTAAAAGGAGACAAAAAACAATTATTTTTCTGCCTCAGGTGATCCCAATCTGGAGAAACCATAAATAGTTACGACGTTACCAATGCCCTGGCTC
8mer-w6	9mer-m11.19		left	Context_12	TCTACAGTCCGACGATCAATCATACCATACGCTTTTCAGCAACTGGAACCATTTTATTATACAACCATCTGCCTCATTTTGCTATGATGGGTAAAAGGAGACAAAAAGATCTTATGGGCGTAGGGTGATCCCAATCTGGAGAAACCATAAATAGTTACGACGTTACCAATGCCCTGGCTCTGCCCTGG
8mer-w6	9mer-m11.19		right	Context_12	TCTACAGTCCGACGATCAATCATACCATACGCTTTTCAGCAACTGGAACCATTTTATAAGTGCTGTATGTTGCTCTTTTTGCTATGATGGGTAAAAGGAGACAATATACAACCATCTGCCTCAGGTGATCCCAATCTGGAGAAACCATAAATAGTTACGACGTTACCAATGCCCTGGCTCTGCCCTGG
8mer-w6	9mer-m11.19		dual	Context_12	TCTACAGTCCGACGATCAATCATACCATACGCTTTTCAGCAACTGGAACCATTTTATTATACAACCATCTGCCTCATTTTGCTATGATGGGTAAAAGGAGACAATATACAACCATCTGCCTCAGGTGATCCCAATCTGGAGAAACCATAAATAGTTACGACGTTACCAATGCCCTGGCTCTGCCCTGG
8mer-w6	9mer-m11.19	A	left	Context_12	TCTACAGTCCGACGATCAATCATACCATACGCTTTTCAGCAACTGGAACCATTTTATTATACAACCAATCTGCCTCATTTTGCTATGATGGGTAAAAGGAGACAAAAAGATCTTATGGGCGTAGGGTGATCCCAATCTGGAGAAACCATAAATAGTTACGACGTTACCAATGCCCTGGCTCTGCCCTG
8mer-w6	9mer-m11.19	A	right	Context_12	TCTACAGTCCGACGATCAATCATACCATACGCTTTTCAGCAACTGGAACCATTTTATAAGTGCTGTATGTTGCTCTTTTTGCTATGATGGGTAAAAGGAGACAATATACAACCAATCTGCCTCAGGTGATCCCAATCTGGAGAAACCATAAATAGTTACGACGTTACCAATGCCCTGGCTCTGCCCTG
8mer-w6	9mer-m11.19	A	dual	Context_12	TCTACAGTCCGACGATCAATCATACCATACGCTTTTCAGCAACTGGAACCATTTTATTATACAACCAATCTGCCTCATTTTGCTATGATGGGTAAAAGGAGACAATATACAACCAATCTGCCTCAGGTGATCCCAATCTGGAGAAACCATAAATAGTTACGACGTTACCAATGCCCTGGCTCTGCCCT
8mer-w6	9mer-m11.19	AAAA	left	Context_12	TCTACAGTCCGACGATCAATCATACCATACGCTTTTCAGCAACTGGAACCATTTTATTATACAACCAAAAATCTGCCTCATTTTGCTATGATGGGTAAAAGGAGACAAAAAGATCTTATGGGCGTAGGGTGATCCCAATCTGGAGAAACCATAAATAGTTACGACGTTACCAATGCCCTGGCTCTGCC
8mer-w6	9mer-m11.19	AAAA	right	Context_12	TCTACAGTCCGACGATCAATCATACCATACGCTTTTCAGCAACTGGAACCATTTTATAAGTGCTGTATGTTGCTCTTTTTGCTATGATGGGTAAAAGGAGACAATATACAACCAAAAATCTGCCTCAGGTGATCCCAATCTGGAGAAACCATAAATAGTTACGACGTTACCAATGCCCTGGCTCTGCC
8mer-w6	9mer-m11.19	AAAA	dual	Context_12	TCTACAGTCCGACGATCAATCATACCATACGCTTTTCAGCAACTGGAACCATTTTATTATACAACCAAAAATCTGCCTCATTTTGCTATGATGGGTAAAAGGAGACAATATACAACCAAAAATCTGCCTCAGGTGATCCCAATCTGGAGAAACCATAAATAGTTACGACGTTACCAATGCCCTGGCTC
8mer-w6	9mer-m11.19	T	left	Context_12	TCTACAGTCCGACGATCAATCATACCATACGCTTTTCAGCAACTGGAACCATTTTATTATACAACCATTCTGCCTCATTTTGCTATGATGGGTAAAAGGAGACAAAAAGATCTTATGGGCGTAGGGTGATCCCAATCTGGAGAAACCATAAATAGTTACGACGTTACCAATGCCCTGGCTCTGCCCTG
8mer-w6	9mer-m11.19	T	right	Context_12	TCTACAGTCCGACGATCAATCATACCATACGCTTTTCAGCAACTGGAACCATTTTATAAGTGCTGTATGTTGCTCTTTTTGCTATGATGGGTAAAAGGAGACAATATACAACCATTCTGCCTCAGGTGATCCCAATCTGGAGAAACCATAAATAGTTACGACGTTACCAATGCCCTGGCTCTGCCCTG
8mer-w6	9mer-m11.19	T	dual	Context_12	TCTACAGTCCGACGATCAATCATACCATACGCTTTTCAGCAACTGGAACCATTTTATTATACAACCATTCTGCCTCATTTTGCTATGATGGGTAAAAGGAGACAATATACAACCATTCTGCCTCAGGTGATCCCAATCTGGAGAAACCATAAATAGTTACGACGTTACCAATGCCCTGGCTCTGCCCT
8mer-w6	9mer-m11.19	TTTT	left	Context_12	TCTACAGTCCGACGATCAATCATACCATACGCTTTTCAGCAACTGGAACCATTTTATTATACAACCATTTTTCTGCCTCATTTTGCTATGATGGGTAAAAGGAGACAAAAAGATCTTATGGGCGTAGGGTGATCCCAATCTGGAGAAACCATAAATAGTTACGACGTTACCAATGCCCTGGCTCTGCC
8mer-w6	9mer-m11.19	TTTT	right	Context_12	TCTACAGTCCGACGATCAATCATACCATACGCTTTTCAGCAACTGGAACCATTTTATAAGTGCTGTATGTTGCTCTTTTTGCTATGATGGGTAAAAGGAGACAATATACAACCATTTTTCTGCCTCAGGTGATCCCAATCTGGAGAAACCATAAATAGTTACGACGTTACCAATGCCCTGGCTCTGCC
8mer-w6	9mer-m11.19	TTTT	dual	Context_12	TCTACAGTCCGACGATCAATCATACCATACGCTTTTCAGCAACTGGAACCATTTTATTATACAACCATTTTTCTGCCTCATTTTGCTATGATGGGTAAAAGGAGACAATATACAACCATTTTTCTGCCTCAGGTGATCCCAATCTGGAGAAACCATAAATAGTTACGACGTTACCAATGCCCTGGCTC
8mer-w6	9mer-m13.21		left	Context_12	TCTACAGTCCGACGATCAATCATACCATACGCTTTTCAGCAACTGGAACCATTTTACTATACAAGTATCTGCCTCATTTTGCTATGATGGGTAAAAGGAGACAAAAAGATCTTATGGGCGTAGGGTGATCCCAATCTGGAGAAACCATAAATAGTTACGACGTTACCAATGCCCTGGCTCTGCCCTGG
8mer-w6	9mer-m13.21		right	Context_12	TCTACAGTCCGACGATCAATCATACCATACGCTTTTCAGCAACTGGAACCATTTTATAAGTGCTGTATGTTGCTCTTTTTGCTATGATGGGTAAAAGGAGACACTATACAATTATCTGCCTCAGGTGATCCCAATCTGGAGAAACCATAAATAGTTACGACGTTACCAATGCCCTGGCTCTGCCCTGG
8mer-w6	9mer-m13.21		dual	Context_12	TCTACAGTCCGACGATCAATCATACCATACGCTTTTCAGCAACTGGAACCATTTTACTATACAAGTATCTGCCTCATTTTGCTATGATGGGTAAAAGGAGACACTATACAATTATCTGCCTCAGGTGATCCCAATCTGGAGAAACCATAAATAGTTACGACGTTACCAATGCCCTGGCTCTGCCCTGG
8mer-w6	9mer-m13.21	A	left	Context_12	TCTACAGTCCGACGATCAATCATACCATACGCTTTTCAGCAACTGGAACCATTTTACTATACAAGTAATCTGCCTCATTTTGCTATGATGGGTAAAAGGAGACAAAAAGATCTTATGGGCGTAGGGTGATCCCAATCTGGAGAAACCATAAATAGTTACGACGTTACCAATGCCCTGGCTCTGCCCTG
8mer-w6	9mer-m13.21	A	right	Context_12	TCTACAGTCCGACGATCAATCATACCATACGCTTTTCAGCAACTGGAACCATTTTATAAGTGCTGTATGTTGCTCTTTTTGCTATGATGGGTAAAAGGAGACACTATACAATTAATCTGCCTCAGGTGATCCCAATCTGGAGAAACCATAAATAGTTACGACGTTACCAATGCCCTGGCTCTGCCCTG
8mer-w6	9mer-m13.21	A	dual	Context_12	TCTACAGTCCGACGATCAATCATACCATACGCTTTTCAGCAACTGGAACCATTTTACTATACAAGTAATCTGCCTCATTTTGCTATGATGGGTAAAAGGAGACACTATACAATTAATCTGCCTCAGGTGATCCCAATCTGGAGAAACCATAAATAGTTACGACGTTACCAATGCCCTGGCTCTGCCCT
8mer-w6	9mer-m13.21	AAAA	left	Context_12	TCTACAGTCCGACGATCAATCATACCATACGCTTTTCAGCAACTGGAACCATTTTACTATACAAGTAAAAATCTGCCTCATTTTGCTATGATGGGTAAAAGGAGACAAAAAGATCTTATGGGCGTAGGGTGATCCCAATCTGGAGAAACCATAAATAGTTACGACGTTACCAATGCCCTGGCTCTGCC
8mer-w6	9mer-m13.21	AAAA	right	Context_12	TCTACAGTCCGACGATCAATCATACCATACGCTTTTCAGCAACTGGAACCATTTTATAAGTGCTGTATGTTGCTCTTTTTGCTATGATGGGTAAAAGGAGACACTATACAATTAAAAATCTGCCTCAGGTGATCCCAATCTGGAGAAACCATAAATAGTTACGACGTTACCAATGCCCTGGCTCTGCC
8mer-w6	9mer-m13.21	AAAA	dual	Context_12	TCTACAGTCCGACGATCAATCATACCATACGCTTTTCAGCAACTGGAACCATTTTACTATACAAGTAAAAATCTGCCTCATTTTGCTATGATGGGTAAAAGGAGACACTATACAATTAAAAATCTGCCTCAGGTGATCCCAATCTGGAGAAACCATAAATAGTTACGACGTTACCAATGCCCTGGCTC
8mer-w6	9mer-m13.21	T	left	Context_12	TCTACAGTCCGACGATCAATCATACCATACGCTTTTCAGCAACTGGAACCATTTTACTATACAAGTATTCTGCCTCATTTTGCTATGATGGGTAAAAGGAGACAAAAAGATCTTATGGGCGTAGGGTGATCCCAATCTGGAGAAACCATAAATAGTTACGACGTTACCAATGCCCTGGCTCTGCCCTG
8mer-w6	9mer-m13.21	T	right	Context_12	TCTACAGTCCGACGATCAATCATACCATACGCTTTTCAGCAACTGGAACCATTTTATAAGTGCTGTATGTTGCTCTTTTTGCTATGATGGGTAAAAGGAGACACTATACAATTATTCTGCCTCAGGTGATCCCAATCTGGAGAAACCATAAATAGTTACGACGTTACCAATGCCCTGGCTCTGCCCTG
8mer-w6	9mer-m13.21	T	dual	Context_12	TCTACAGTCCGACGATCAATCATACCATACGCTTTTCAGCAACTGGAACCATTTTACTATACAAGTATTCTGCCTCATTTTGCTATGATGGGTAAAAGGAGACACTATACAATTATTCTGCCTCAGGTGATCCCAATCTGGAGAAACCATAAATAGTTACGACGTTACCAATGCCCTGGCTCTGCCCT
8mer-w6	9mer-m13.21	TTTT	left	Context_12	TCTACAGTCCGACGATCAATCATACCATACGCTTTTCAGCAACTGGAACCATTTTACTATACAAGTATTTTTCTGCCTCATTTTGCTATGATGGGTAAAAGGAGACAAAAAGATCTTATGGGCGTAGGGTGATCCCAATCTGGAGAAACCATAAATAGTTACGACGTTACCAATGCCCTGGCTCTGCC
8mer-w6	9mer-m13.21	TTTT	right	Context_12	TCTACAGTCCGACGATCAATCATACCATACGCTTTTCAGCAACTGGAACCATTTTATAAGTGCTGTATGTTGCTCTTTTTGCTATGATGGGTAAAAGGAGACACTATACAATTATTTTTCTGCCTCAGGTGATCCCAATCTGGAGAAACCATAAATAGTTACGACGTTACCAATGCCCTGGCTCTGCC
8mer-w6	9mer-m13.21	TTTT	dual	Context_12	TCTACAGTCCGACGATCAATCATACCATACGCTTTTCAGCAACTGGAACCATTTTACTATACAAGTATTTTTCTGCCTCATTTTGCTATGATGGGTAAAAGGAGACACTATACAATTATTTTTCTGCCTCAGGTGATCCCAATCTGGAGAAACCATAAATAGTTACGACGTTACCAATGCCCTGGCTC
No_site_0				Context_12	TCTACAGTCCGACGATCAATCATACCATACGCTTTTCAGCAACTGGAACCATTTTATAAGTGCTGTATGTTGCTCTTTTTGCTATGATGGGTAAAAGGAGACAAAAAGATCTTATGGGCGTAGGGTGATCCCAATCTGGAGAAACCATAAATAGTTACGACGTTACCAATGCCCTGGCTCTGCCCTGG
No_site_1				Context_12	TCTACAGTCCGACGATCAATCATACCATACGCTTTTCAGCAACTGGAACCATTTTAAGATTGATTTTTGATAGGACTTTTGCTATGATGGGTAAAAGGAGACATTGGTTCTCTGCTAAACTTTGGTGATCCCAATCTGGAGAAACCATAAATAGTTACGACGTTACCAATGCCCTGGCTCTGCCCTGG
No_site_2				Context_12	TCTACAGTCCGACGATCAATCATACCATACGCTTTTCAGCAACTGGAACCATTTTATGCTTGAATTTAGACCTGTATTTTGCTATGATGGGTAAAAGGAGACAGAGTATTCTGGAGAACAGAGGGTGATCCCAATCTGGAGAAACCATAAATAGTTACGACGTTACCAATGCCCTGGCTCTGCCCTGG
No_site_3				Context_12	TCTACAGTCCGACGATCAATCATACCATACGCTTTTCAGCAACTGGAACCATTTTAAAGCGTTCATTTGGGCTTTTTTTTGCTATGATGGGTAAAAGGAGACAAATCGGTGACCCTCTTGTGGGGTGATCCCAATCTGGAGAAACCATAAATAGTTACGACGTTACCAATGCCCTGGCTCTGCCCTGG
No_site_4				Context_12	TCTACAGTCCGACGATCAATCATACCATACGCTTTTCAGCAACTGGAACCATTTTATGAAGCTTTTTTACCCCACCTTTTGCTATGATGGGTAAAAGGAGACATTGTGTTAACCACAATTTGAGGTGATCCCAATCTGGAGAAACCATAAATAGTTACGACGTTACCAATGCCCTGGCTCTGCCCTGG
No_site_5				Context_12	TCTACAGTCCGACGATCAATCATACCATACGCTTTTCAGCAACTGGAACCATTTTATCCTCTGTTTTTTGGGAAGTTTTTGCTATGATGGGTAAAAGGAGACATGTTTAAAATTCCGTCACAGGGTGATCCCAATCTGGAGAAACCATAAATAGTTACGACGTTACCAATGCCCTGGCTCTGCCCTGG
No_site_6				Context_12	TCTACAGTCCGACGATCAATCATACCATACGCTTTTCAGCAACTGGAACCATTTTACCAACTCCTAAACTTTGGTCTTTTGCTATGATGGGTAAAAGGAGACAGTGGTTTGCAGGCAAGCCCAGGTGATCCCAATCTGGAGAAACCATAAATAGTTACGACGTTACCAATGCCCTGGCTCTGCCCTGG
lin-41	9mer-m11.19	T	dual	Context_13	TCTACAGTCCGACGATCGCCTTACAGCATGTTCTTAACTTGTTTAAATTTGAGGCAATATACAACCATTCTACACTCATGATGCCCAGATTGTCTGGCAGGTGGAATATACAACCATTCTGCCTCGTAACCCCAATCTCCTTGGGGGTGGACCTAGTGCGTTTGCCTACCAATGCCCTGGCTCTGCCC
8mer			left	Context_13	TCTACAGTCCGACGATCGCCTTACAGCATGTTCTTAACTTGTTTAAATTTGAGGCAAGTATGGGAAATCTACCTCATGATGCCCAGATTGTCTGGCAGGTGGAAGTCCTGATTATGTTTCATGTAACCCCAATCTCCTTGGGGGTGGACCTAGTGCGTTTGCCTACCAATGCCCTGGCTCTGCCCTGG
8mer			right	Context_13	TCTACAGTCCGACGATCGCCTTACAGCATGTTCTTAACTTGTTTAAATTTGAGGCAAGTATGGGAAATGGCTCAGTTGATGCCCAGATTGTCTGGCAGGTGGAAGTCCTGATTATCTACCTCATAACCCCAATCTCCTTGGGGGTGGACCTAGTGCGTTTGCCTACCAATGCCCTGGCTCTGCCCTGG
8mer			dual	Context_13	TCTACAGTCCGACGATCGCCTTACAGCATGTTCTTAACTTGTTTAAATTTGAGGCAAGTATGGGAAATCTACCTCATGATGCCCAGATTGTCTGGCAGGTGGAAGTCCTGATTATCTACCTCATAACCCCAATCTCCTTGGGGGTGGACCTAGTGCGTTTGCCTACCAATGCCCTGGCTCTGCCCTGG
7mer-m8			left	Context_13	TCTACAGTCCGACGATCGCCTTACAGCATGTTCTTAACTTGTTTAAATTTGAGGCAAGTATGGGAAATCTACCTCTTGATGCCCAGATTGTCTGGCAGGTGGAAGTCCTGATTATGTTTCATGTAACCCCAATCTCCTTGGGGGTGGACCTAGTGCGTTTGCCTACCAATGCCCTGGCTCTGCCCTGG
7mer-m8			right	Context_13	TCTACAGTCCGACGATCGCCTTACAGCATGTTCTTAACTTGTTTAAATTTGAGGCAAGTATGGGAAATGGCTCAGTTGATGCCCAGATTGTCTGGCAGGTGGAAGTCCTGATTATCTACCTCGTAACCCCAATCTCCTTGGGGGTGGACCTAGTGCGTTTGCCTACCAATGCCCTGGCTCTGCCCTGG
7mer-m8			dual	Context_13	TCTACAGTCCGACGATCGCCTTACAGCATGTTCTTAACTTGTTTAAATTTGAGGCAAGTATGGGAAATCTACCTCTTGATGCCCAGATTGTCTGGCAGGTGGAAGTCCTGATTATCTACCTCGTAACCCCAATCTCCTTGGGGGTGGACCTAGTGCGTTTGCCTACCAATGCCCTGGCTCTGCCCTGG
7mer-A1			left	Context_13	TCTACAGTCCGACGATCGCCTTACAGCATGTTCTTAACTTGTTTAAATTTGAGGCAAGTATGGGAAATGTACCTCATGATGCCCAGATTGTCTGGCAGGTGGAAGTCCTGATTATGTTTCATGTAACCCCAATCTCCTTGGGGGTGGACCTAGTGCGTTTGCCTACCAATGCCCTGGCTCTGCCCTGG
7mer-A1			right	Context_13	TCTACAGTCCGACGATCGCCTTACAGCATGTTCTTAACTTGTTTAAATTTGAGGCAAGTATGGGAAATGGCTCAGTTGATGCCCAGATTGTCTGGCAGGTGGAAGTCCTGATTATGTACCTCATAACCCCAATCTCCTTGGGGGTGGACCTAGTGCGTTTGCCTACCAATGCCCTGGCTCTGCCCTGG
7mer-A1			dual	Context_13	TCTACAGTCCGACGATCGCCTTACAGCATGTTCTTAACTTGTTTAAATTTGAGGCAAGTATGGGAAATGTACCTCATGATGCCCAGATTGTCTGGCAGGTGGAAGTCCTGATTATGTACCTCATAACCCCAATCTCCTTGGGGGTGGACCTAGTGCGTTTGCCTACCAATGCCCTGGCTCTGCCCTGG
6mer			left	Context_13	TCTACAGTCCGACGATCGCCTTACAGCATGTTCTTAACTTGTTTAAATTTGAGGCAAGTATGGGAAATGTACCTCTTGATGCCCAGATTGTCTGGCAGGTGGAAGTCCTGATTATGTTTCATGTAACCCCAATCTCCTTGGGGGTGGACCTAGTGCGTTTGCCTACCAATGCCCTGGCTCTGCCCTGG
6mer			right	Context_13	TCTACAGTCCGACGATCGCCTTACAGCATGTTCTTAACTTGTTTAAATTTGAGGCAAGTATGGGAAATGGCTCAGTTGATGCCCAGATTGTCTGGCAGGTGGAAGTCCTGATTATGTACCTCGTAACCCCAATCTCCTTGGGGGTGGACCTAGTGCGTTTGCCTACCAATGCCCTGGCTCTGCCCTGG
6mer			dual	Context_13	TCTACAGTCCGACGATCGCCTTACAGCATGTTCTTAACTTGTTTAAATTTGAGGCAAGTATGGGAAATGTACCTCTTGATGCCCAGATTGTCTGGCAGGTGGAAGTCCTGATTATGTACCTCGTAACCCCAATCTCCTTGGGGGTGGACCTAGTGCGTTTGCCTACCAATGCCCTGGCTCTGCCCTGG
8mer-w6			left	Context_13	TCTACAGTCCGACGATCGCCTTACAGCATGTTCTTAACTTGTTTAAATTTGAGGCAAGTATGGGAAATCTGCCTCATGATGCCCAGATTGTCTGGCAGGTGGAAGTCCTGATTATGTTTCATGTAACCCCAATCTCCTTGGGGGTGGACCTAGTGCGTTTGCCTACCAATGCCCTGGCTCTGCCCTGG
8mer-w6			right	Context_13	TCTACAGTCCGACGATCGCCTTACAGCATGTTCTTAACTTGTTTAAATTTGAGGCAAGTATGGGAAATGGCTCAGTTGATGCCCAGATTGTCTGGCAGGTGGAAGTCCTGATTATCTGCCTCATAACCCCAATCTCCTTGGGGGTGGACCTAGTGCGTTTGCCTACCAATGCCCTGGCTCTGCCCTGG
8mer-w6			dual	Context_13	TCTACAGTCCGACGATCGCCTTACAGCATGTTCTTAACTTGTTTAAATTTGAGGCAAGTATGGGAAATCTGCCTCATGATGCCCAGATTGTCTGGCAGGTGGAAGTCCTGATTATCTGCCTCATAACCCCAATCTCCTTGGGGGTGGACCTAGTGCGTTTGCCTACCAATGCCCTGGCTCTGCCCTGG
8mer-w6	4mer-m13.16		left	Context_13	TCTACAGTCCGACGATCGCCTTACAGCATGTTCTTAACTTGTTTAAATTTGAGGCAAGTAACAAAAATCTGCCTCATGATGCCCAGATTGTCTGGCAGGTGGAAGTCCTGATTATGTTTCATGTAACCCCAATCTCCTTGGGGGTGGACCTAGTGCGTTTGCCTACCAATGCCCTGGCTCTGCCCTGG
8mer-w6	4mer-m13.16		right	Context_13	TCTACAGTCCGACGATCGCCTTACAGCATGTTCTTAACTTGTTTAAATTTGAGGCAAGTATGGGAAATGGCTCAGTTGATGCCCAGATTGTCTGGCAGGTGGAAGTCACAATTATCTGCCTCATAACCCCAATCTCCTTGGGGGTGGACCTAGTGCGTTTGCCTACCAATGCCCTGGCTCTGCCCTGG
8mer-w6	4mer-m13.16		dual	Context_13	TCTACAGTCCGACGATCGCCTTACAGCATGTTCTTAACTTGTTTAAATTTGAGGCAAGTAACAAAAATCTGCCTCATGATGCCCAGATTGTCTGGCAGGTGGAAGTCACAATTATCTGCCTCATAACCCCAATCTCCTTGGGGGTGGACCTAGTGCGTTTGCCTACCAATGCCCTGGCTCTGCCCTGG
8mer-w6	4mer-m13.16	A	left	Context_13	TCTACAGTCCGACGATCGCCTTACAGCATGTTCTTAACTTGTTTAAATTTGAGGCAAGTAACAAAAAATCTGCCTCATGATGCCCAGATTGTCTGGCAGGTGGAAGTCCTGATTATGTTTCATGTAACCCCAATCTCCTTGGGGGTGGACCTAGTGCGTTTGCCTACCAATGCCCTGGCTCTGCCCTG
8mer-w6	4mer-m13.16	A	right	Context_13	TCTACAGTCCGACGATCGCCTTACAGCATGTTCTTAACTTGTTTAAATTTGAGGCAAGTATGGGAAATGGCTCAGTTGATGCCCAGATTGTCTGGCAGGTGGAAGTCACAATTAATCTGCCTCATAACCCCAATCTCCTTGGGGGTGGACCTAGTGCGTTTGCCTACCAATGCCCTGGCTCTGCCCTG
8mer-w6	4mer-m13.16	A	dual	Context_13	TCTACAGTCCGACGATCGCCTTACAGCATGTTCTTAACTTGTTTAAATTTGAGGCAAGTAACAAAAAATCTGCCTCATGATGCCCAGATTGTCTGGCAGGTGGAAGTCACAATTAATCTGCCTCATAACCCCAATCTCCTTGGGGGTGGACCTAGTGCGTTTGCCTACCAATGCCCTGGCTCTGCCCT
8mer-w6	4mer-m13.16	AAAA	left	Context_13	TCTACAGTCCGACGATCGCCTTACAGCATGTTCTTAACTTGTTTAAATTTGAGGCAAGTAACAAAAAAAAATCTGCCTCATGATGCCCAGATTGTCTGGCAGGTGGAAGTCCTGATTATGTTTCATGTAACCCCAATCTCCTTGGGGGTGGACCTAGTGCGTTTGCCTACCAATGCCCTGGCTCTGCC
8mer-w6	4mer-m13.16	AAAA	right	Context_13	TCTACAGTCCGACGATCGCCTTACAGCATGTTCTTAACTTGTTTAAATTTGAGGCAAGTATGGGAAATGGCTCAGTTGATGCCCAGATTGTCTGGCAGGTGGAAGTCACAATTAAAAATCTGCCTCATAACCCCAATCTCCTTGGGGGTGGACCTAGTGCGTTTGCCTACCAATGCCCTGGCTCTGCC
8mer-w6	4mer-m13.16	AAAA	dual	Context_13	TCTACAGTCCGACGATCGCCTTACAGCATGTTCTTAACTTGTTTAAATTTGAGGCAAGTAACAAAAAAAAATCTGCCTCATGATGCCCAGATTGTCTGGCAGGTGGAAGTCACAATTAAAAATCTGCCTCATAACCCCAATCTCCTTGGGGGTGGACCTAGTGCGTTTGCCTACCAATGCCCTGGCTC
8mer-w6	4mer-m13.16	T	left	Context_13	TCTACAGTCCGACGATCGCCTTACAGCATGTTCTTAACTTGTTTAAATTTGAGGCAAGTAACAAAAATTCTGCCTCATGATGCCCAGATTGTCTGGCAGGTGGAAGTCCTGATTATGTTTCATGTAACCCCAATCTCCTTGGGGGTGGACCTAGTGCGTTTGCCTACCAATGCCCTGGCTCTGCCCTG
8mer-w6	4mer-m13.16	T	right	Context_13	TCTACAGTCCGACGATCGCCTTACAGCATGTTCTTAACTTGTTTAAATTTGAGGCAAGTATGGGAAATGGCTCAGTTGATGCCCAGATTGTCTGGCAGGTGGAAGTCACAATTATTCTGCCTCATAACCCCAATCTCCTTGGGGGTGGACCTAGTGCGTTTGCCTACCAATGCCCTGGCTCTGCCCTG
8mer-w6	4mer-m13.16	T	dual	Context_13	TCTACAGTCCGACGATCGCCTTACAGCATGTTCTTAACTTGTTTAAATTTGAGGCAAGTAACAAAAATTCTGCCTCATGATGCCCAGATTGTCTGGCAGGTGGAAGTCACAATTATTCTGCCTCATAACCCCAATCTCCTTGGGGGTGGACCTAGTGCGTTTGCCTACCAATGCCCTGGCTCTGCCCT
8mer-w6	4mer-m13.16	TTTT	left	Context_13	TCTACAGTCCGACGATCGCCTTACAGCATGTTCTTAACTTGTTTAAATTTGAGGCAAGTAACAAAAATTTTTCTGCCTCATGATGCCCAGATTGTCTGGCAGGTGGAAGTCCTGATTATGTTTCATGTAACCCCAATCTCCTTGGGGGTGGACCTAGTGCGTTTGCCTACCAATGCCCTGGCTCTGCC
8mer-w6	4mer-m13.16	TTTT	right	Context_13	TCTACAGTCCGACGATCGCCTTACAGCATGTTCTTAACTTGTTTAAATTTGAGGCAAGTATGGGAAATGGCTCAGTTGATGCCCAGATTGTCTGGCAGGTGGAAGTCACAATTATTTTTCTGCCTCATAACCCCAATCTCCTTGGGGGTGGACCTAGTGCGTTTGCCTACCAATGCCCTGGCTCTGCC
8mer-w6	4mer-m13.16	TTTT	dual	Context_13	TCTACAGTCCGACGATCGCCTTACAGCATGTTCTTAACTTGTTTAAATTTGAGGCAAGTAACAAAAATTTTTCTGCCTCATGATGCCCAGATTGTCTGGCAGGTGGAAGTCACAATTATTTTTCTGCCTCATAACCCCAATCTCCTTGGGGGTGGACCTAGTGCGTTTGCCTACCAATGCCCTGGCTC
8mer-w6	9mer-m11.19		left	Context_13	TCTACAGTCCGACGATCGCCTTACAGCATGTTCTTAACTTGTTTAAATTTGAGGCAATATACAACCATCTGCCTCATGATGCCCAGATTGTCTGGCAGGTGGAAGTCCTGATTATGTTTCATGTAACCCCAATCTCCTTGGGGGTGGACCTAGTGCGTTTGCCTACCAATGCCCTGGCTCTGCCCTGG
8mer-w6	9mer-m11.19		right	Context_13	TCTACAGTCCGACGATCGCCTTACAGCATGTTCTTAACTTGTTTAAATTTGAGGCAAGTATGGGAAATGGCTCAGTTGATGCCCAGATTGTCTGGCAGGTGGAATATACAACCATCTGCCTCATAACCCCAATCTCCTTGGGGGTGGACCTAGTGCGTTTGCCTACCAATGCCCTGGCTCTGCCCTGG
8mer-w6	9mer-m11.19		dual	Context_13	TCTACAGTCCGACGATCGCCTTACAGCATGTTCTTAACTTGTTTAAATTTGAGGCAATATACAACCATCTGCCTCATGATGCCCAGATTGTCTGGCAGGTGGAATATACAACCATCTGCCTCATAACCCCAATCTCCTTGGGGGTGGACCTAGTGCGTTTGCCTACCAATGCCCTGGCTCTGCCCTGG
8mer-w6	9mer-m11.19	A	left	Context_13	TCTACAGTCCGACGATCGCCTTACAGCATGTTCTTAACTTGTTTAAATTTGAGGCAATATACAACCAATCTGCCTCATGATGCCCAGATTGTCTGGCAGGTGGAAGTCCTGATTATGTTTCATGTAACCCCAATCTCCTTGGGGGTGGACCTAGTGCGTTTGCCTACCAATGCCCTGGCTCTGCCCTG
8mer-w6	9mer-m11.19	A	right	Context_13	TCTACAGTCCGACGATCGCCTTACAGCATGTTCTTAACTTGTTTAAATTTGAGGCAAGTATGGGAAATGGCTCAGTTGATGCCCAGATTGTCTGGCAGGTGGAATATACAACCAATCTGCCTCATAACCCCAATCTCCTTGGGGGTGGACCTAGTGCGTTTGCCTACCAATGCCCTGGCTCTGCCCTG
8mer-w6	9mer-m11.19	A	dual	Context_13	TCTACAGTCCGACGATCGCCTTACAGCATGTTCTTAACTTGTTTAAATTTGAGGCAATATACAACCAATCTGCCTCATGATGCCCAGATTGTCTGGCAGGTGGAATATACAACCAATCTGCCTCATAACCCCAATCTCCTTGGGGGTGGACCTAGTGCGTTTGCCTACCAATGCCCTGGCTCTGCCCT
8mer-w6	9mer-m11.19	AAAA	left	Context_13	TCTACAGTCCGACGATCGCCTTACAGCATGTTCTTAACTTGTTTAAATTTGAGGCAATATACAACCAAAAATCTGCCTCATGATGCCCAGATTGTCTGGCAGGTGGAAGTCCTGATTATGTTTCATGTAACCCCAATCTCCTTGGGGGTGGACCTAGTGCGTTTGCCTACCAATGCCCTGGCTCTGCC
8mer-w6	9mer-m11.19	AAAA	right	Context_13	TCTACAGTCCGACGATCGCCTTACAGCATGTTCTTAACTTGTTTAAATTTGAGGCAAGTATGGGAAATGGCTCAGTTGATGCCCAGATTGTCTGGCAGGTGGAATATACAACCAAAAATCTGCCTCATAACCCCAATCTCCTTGGGGGTGGACCTAGTGCGTTTGCCTACCAATGCCCTGGCTCTGCC
8mer-w6	9mer-m11.19	AAAA	dual	Context_13	TCTACAGTCCGACGATCGCCTTACAGCATGTTCTTAACTTGTTTAAATTTGAGGCAATATACAACCAAAAATCTGCCTCATGATGCCCAGATTGTCTGGCAGGTGGAATATACAACCAAAAATCTGCCTCATAACCCCAATCTCCTTGGGGGTGGACCTAGTGCGTTTGCCTACCAATGCCCTGGCTC
8mer-w6	9mer-m11.19	T	left	Context_13	TCTACAGTCCGACGATCGCCTTACAGCATGTTCTTAACTTGTTTAAATTTGAGGCAATATACAACCATTCTGCCTCATGATGCCCAGATTGTCTGGCAGGTGGAAGTCCTGATTATGTTTCATGTAACCCCAATCTCCTTGGGGGTGGACCTAGTGCGTTTGCCTACCAATGCCCTGGCTCTGCCCTG
8mer-w6	9mer-m11.19	T	right	Context_13	TCTACAGTCCGACGATCGCCTTACAGCATGTTCTTAACTTGTTTAAATTTGAGGCAAGTATGGGAAATGGCTCAGTTGATGCCCAGATTGTCTGGCAGGTGGAATATACAACCATTCTGCCTCATAACCCCAATCTCCTTGGGGGTGGACCTAGTGCGTTTGCCTACCAATGCCCTGGCTCTGCCCTG
8mer-w6	9mer-m11.19	T	dual	Context_13	TCTACAGTCCGACGATCGCCTTACAGCATGTTCTTAACTTGTTTAAATTTGAGGCAATATACAACCATTCTGCCTCATGATGCCCAGATTGTCTGGCAGGTGGAATATACAACCATTCTGCCTCATAACCCCAATCTCCTTGGGGGTGGACCTAGTGCGTTTGCCTACCAATGCCCTGGCTCTGCCCT
8mer-w6	9mer-m11.19	TTTT	left	Context_13	TCTACAGTCCGACGATCGCCTTACAGCATGTTCTTAACTTGTTTAAATTTGAGGCAATATACAACCATTTTTCTGCCTCATGATGCCCAGATTGTCTGGCAGGTGGAAGTCCTGATTATGTTTCATGTAACCCCAATCTCCTTGGGGGTGGACCTAGTGCGTTTGCCTACCAATGCCCTGGCTCTGCC
8mer-w6	9mer-m11.19	TTTT	right	Context_13	TCTACAGTCCGACGATCGCCTTACAGCATGTTCTTAACTTGTTTAAATTTGAGGCAAGTATGGGAAATGGCTCAGTTGATGCCCAGATTGTCTGGCAGGTGGAATATACAACCATTTTTCTGCCTCATAACCCCAATCTCCTTGGGGGTGGACCTAGTGCGTTTGCCTACCAATGCCCTGGCTCTGCC
8mer-w6	9mer-m11.19	TTTT	dual	Context_13	TCTACAGTCCGACGATCGCCTTACAGCATGTTCTTAACTTGTTTAAATTTGAGGCAATATACAACCATTTTTCTGCCTCATGATGCCCAGATTGTCTGGCAGGTGGAATATACAACCATTTTTCTGCCTCATAACCCCAATCTCCTTGGGGGTGGACCTAGTGCGTTTGCCTACCAATGCCCTGGCTC
8mer-w6	9mer-m13.21		left	Context_13	TCTACAGTCCGACGATCGCCTTACAGCATGTTCTTAACTTGTTTAAATTTGAGGCACTATACAAAAATCTGCCTCATGATGCCCAGATTGTCTGGCAGGTGGAAGTCCTGATTATGTTTCATGTAACCCCAATCTCCTTGGGGGTGGACCTAGTGCGTTTGCCTACCAATGCCCTGGCTCTGCCCTGG
8mer-w6	9mer-m13.21		right	Context_13	TCTACAGTCCGACGATCGCCTTACAGCATGTTCTTAACTTGTTTAAATTTGAGGCAAGTATGGGAAATGGCTCAGTTGATGCCCAGATTGTCTGGCAGGTGGACTATACAATTATCTGCCTCATAACCCCAATCTCCTTGGGGGTGGACCTAGTGCGTTTGCCTACCAATGCCCTGGCTCTGCCCTGG
8mer-w6	9mer-m13.21		dual	Context_13	TCTACAGTCCGACGATCGCCTTACAGCATGTTCTTAACTTGTTTAAATTTGAGGCACTATACAAAAATCTGCCTCATGATGCCCAGATTGTCTGGCAGGTGGACTATACAATTATCTGCCTCATAACCCCAATCTCCTTGGGGGTGGACCTAGTGCGTTTGCCTACCAATGCCCTGGCTCTGCCCTGG
8mer-w6	9mer-m13.21	A	left	Context_13	TCTACAGTCCGACGATCGCCTTACAGCATGTTCTTAACTTGTTTAAATTTGAGGCACTATACAAAAAATCTGCCTCATGATGCCCAGATTGTCTGGCAGGTGGAAGTCCTGATTATGTTTCATGTAACCCCAATCTCCTTGGGGGTGGACCTAGTGCGTTTGCCTACCAATGCCCTGGCTCTGCCCTG
8mer-w6	9mer-m13.21	A	right	Context_13	TCTACAGTCCGACGATCGCCTTACAGCATGTTCTTAACTTGTTTAAATTTGAGGCAAGTATGGGAAATGGCTCAGTTGATGCCCAGATTGTCTGGCAGGTGGACTATACAATTAATCTGCCTCATAACCCCAATCTCCTTGGGGGTGGACCTAGTGCGTTTGCCTACCAATGCCCTGGCTCTGCCCTG
8mer-w6	9mer-m13.21	A	dual	Context_13	TCTACAGTCCGACGATCGCCTTACAGCATGTTCTTAACTTGTTTAAATTTGAGGCACTATACAAAAAATCTGCCTCATGATGCCCAGATTGTCTGGCAGGTGGACTATACAATTAATCTGCCTCATAACCCCAATCTCCTTGGGGGTGGACCTAGTGCGTTTGCCTACCAATGCCCTGGCTCTGCCCT
8mer-w6	9mer-m13.21	AAAA	left	Context_13	TCTACAGTCCGACGATCGCCTTACAGCATGTTCTTAACTTGTTTAAATTTGAGGCACTATACAAAAAAAAATCTGCCTCATGATGCCCAGATTGTCTGGCAGGTGGAAGTCCTGATTATGTTTCATGTAACCCCAATCTCCTTGGGGGTGGACCTAGTGCGTTTGCCTACCAATGCCCTGGCTCTGCC
8mer-w6	9mer-m13.21	AAAA	right	Context_13	TCTACAGTCCGACGATCGCCTTACAGCATGTTCTTAACTTGTTTAAATTTGAGGCAAGTATGGGAAATGGCTCAGTTGATGCCCAGATTGTCTGGCAGGTGGACTATACAATTAAAAATCTGCCTCATAACCCCAATCTCCTTGGGGGTGGACCTAGTGCGTTTGCCTACCAATGCCCTGGCTCTGCC
8mer-w6	9mer-m13.21	AAAA	dual	Context_13	TCTACAGTCCGACGATCGCCTTACAGCATGTTCTTAACTTGTTTAAATTTGAGGCACTATACAAAAAAAAATCTGCCTCATGATGCCCAGATTGTCTGGCAGGTGGACTATACAATTAAAAATCTGCCTCATAACCCCAATCTCCTTGGGGGTGGACCTAGTGCGTTTGCCTACCAATGCCCTGGCTC
8mer-w6	9mer-m13.21	T	left	Context_13	TCTACAGTCCGACGATCGCCTTACAGCATGTTCTTAACTTGTTTAAATTTGAGGCACTATACAAAAATTCTGCCTCATGATGCCCAGATTGTCTGGCAGGTGGAAGTCCTGATTATGTTTCATGTAACCCCAATCTCCTTGGGGGTGGACCTAGTGCGTTTGCCTACCAATGCCCTGGCTCTGCCCTG
8mer-w6	9mer-m13.21	T	right	Context_13	TCTACAGTCCGACGATCGCCTTACAGCATGTTCTTAACTTGTTTAAATTTGAGGCAAGTATGGGAAATGGCTCAGTTGATGCCCAGATTGTCTGGCAGGTGGACTATACAATTATTCTGCCTCATAACCCCAATCTCCTTGGGGGTGGACCTAGTGCGTTTGCCTACCAATGCCCTGGCTCTGCCCTG
8mer-w6	9mer-m13.21	T	dual	Context_13	TCTACAGTCCGACGATCGCCTTACAGCATGTTCTTAACTTGTTTAAATTTGAGGCACTATACAAAAATTCTGCCTCATGATGCCCAGATTGTCTGGCAGGTGGACTATACAATTATTCTGCCTCATAACCCCAATCTCCTTGGGGGTGGACCTAGTGCGTTTGCCTACCAATGCCCTGGCTCTGCCCT
8mer-w6	9mer-m13.21	TTTT	left	Context_13	TCTACAGTCCGACGATCGCCTTACAGCATGTTCTTAACTTGTTTAAATTTGAGGCACTATACAAAAATTTTTCTGCCTCATGATGCCCAGATTGTCTGGCAGGTGGAAGTCCTGATTATGTTTCATGTAACCCCAATCTCCTTGGGGGTGGACCTAGTGCGTTTGCCTACCAATGCCCTGGCTCTGCC
8mer-w6	9mer-m13.21	TTTT	right	Context_13	TCTACAGTCCGACGATCGCCTTACAGCATGTTCTTAACTTGTTTAAATTTGAGGCAAGTATGGGAAATGGCTCAGTTGATGCCCAGATTGTCTGGCAGGTGGACTATACAATTATTTTTCTGCCTCATAACCCCAATCTCCTTGGGGGTGGACCTAGTGCGTTTGCCTACCAATGCCCTGGCTCTGCC
8mer-w6	9mer-m13.21	TTTT	dual	Context_13	TCTACAGTCCGACGATCGCCTTACAGCATGTTCTTAACTTGTTTAAATTTGAGGCACTATACAAAAATTTTTCTGCCTCATGATGCCCAGATTGTCTGGCAGGTGGACTATACAATTATTTTTCTGCCTCATAACCCCAATCTCCTTGGGGGTGGACCTAGTGCGTTTGCCTACCAATGCCCTGGCTC
No_site_0				Context_13	TCTACAGTCCGACGATCGCCTTACAGCATGTTCTTAACTTGTTTAAATTTGAGGCAAGTATGGGAAATGGCTCAGTTGATGCCCAGATTGTCTGGCAGGTGGAAGTCCTGATTATGTTTCATGTAACCCCAATCTCCTTGGGGGTGGACCTAGTGCGTTTGCCTACCAATGCCCTGGCTCTGCCCTGG
No_site_1				Context_13	TCTACAGTCCGACGATCGCCTTACAGCATGTTCTTAACTTGTTTAAATTTGAGGCATGGGCAATATTTCAGGAGACTGATGCCCAGATTGTCTGGCAGGTGGAAAAGTGCTAAGGCCAGCCACTAACCCCAATCTCCTTGGGGGTGGACCTAGTGCGTTTGCCTACCAATGCCCTGGCTCTGCCCTGG
No_site_2				Context_13	TCTACAGTCCGACGATCGCCTTACAGCATGTTCTTAACTTGTTTAAATTTGAGGCAGCCCCCATTTTTAGTTCTTATGATGCCCAGATTGTCTGGCAGGTGGAAAAGCCAATTTTTAGGATGATAACCCCAATCTCCTTGGGGGTGGACCTAGTGCGTTTGCCTACCAATGCCCTGGCTCTGCCCTGG
No_site_3				Context_13	TCTACAGTCCGACGATCGCCTTACAGCATGTTCTTAACTTGTTTAAATTTGAGGCAATTTTGATTTTTCCTGAGAGTGATGCCCAGATTGTCTGGCAGGTGGAGCCTTGGTCCAATGGCACTGTAACCCCAATCTCCTTGGGGGTGGACCTAGTGCGTTTGCCTACCAATGCCCTGGCTCTGCCCTGG
No_site_4				Context_13	TCTACAGTCCGACGATCGCCTTACAGCATGTTCTTAACTTGTTTAAATTTGAGGCATTGTAATGATAACAATTCAGTGATGCCCAGATTGTCTGGCAGGTGGATTCACTGCTGACTGCTATCATAACCCCAATCTCCTTGGGGGTGGACCTAGTGCGTTTGCCTACCAATGCCCTGGCTCTGCCCTGG
No_site_5				Context_13	TCTACAGTCCGACGATCGCCTTACAGCATGTTCTTAACTTGTTTAAATTTGAGGCATCACATCAAAATTTTGAAGTTGATGCCCAGATTGTCTGGCAGGTGGAGCCTGGCCCTTAACACTTGATAACCCCAATCTCCTTGGGGGTGGACCTAGTGCGTTTGCCTACCAATGCCCTGGCTCTGCCCTGG
No_site_6				Context_13	TCTACAGTCCGACGATCGCCTTACAGCATGTTCTTAACTTGTTTAAATTTGAGGCAGCACACACTTTATTTTCAGCTGATGCCCAGATTGTCTGGCAGGTGGAAACATGGGGCTTAATTGTGGTAACCCCAATCTCCTTGGGGGTGGACCTAGTGCGTTTGCCTACCAATGCCCTGGCTCTGCCCTGG
