# Supplementary figures and images for: MicroRNA 3′-compensatory pairing occurs through two binding modes, with affinity shaped by nucleotide identity and position
Source: eLife journal article supplement (doi:10.7554/elife.69803), 2022-02-22

Figure 5—figure supplement 8.

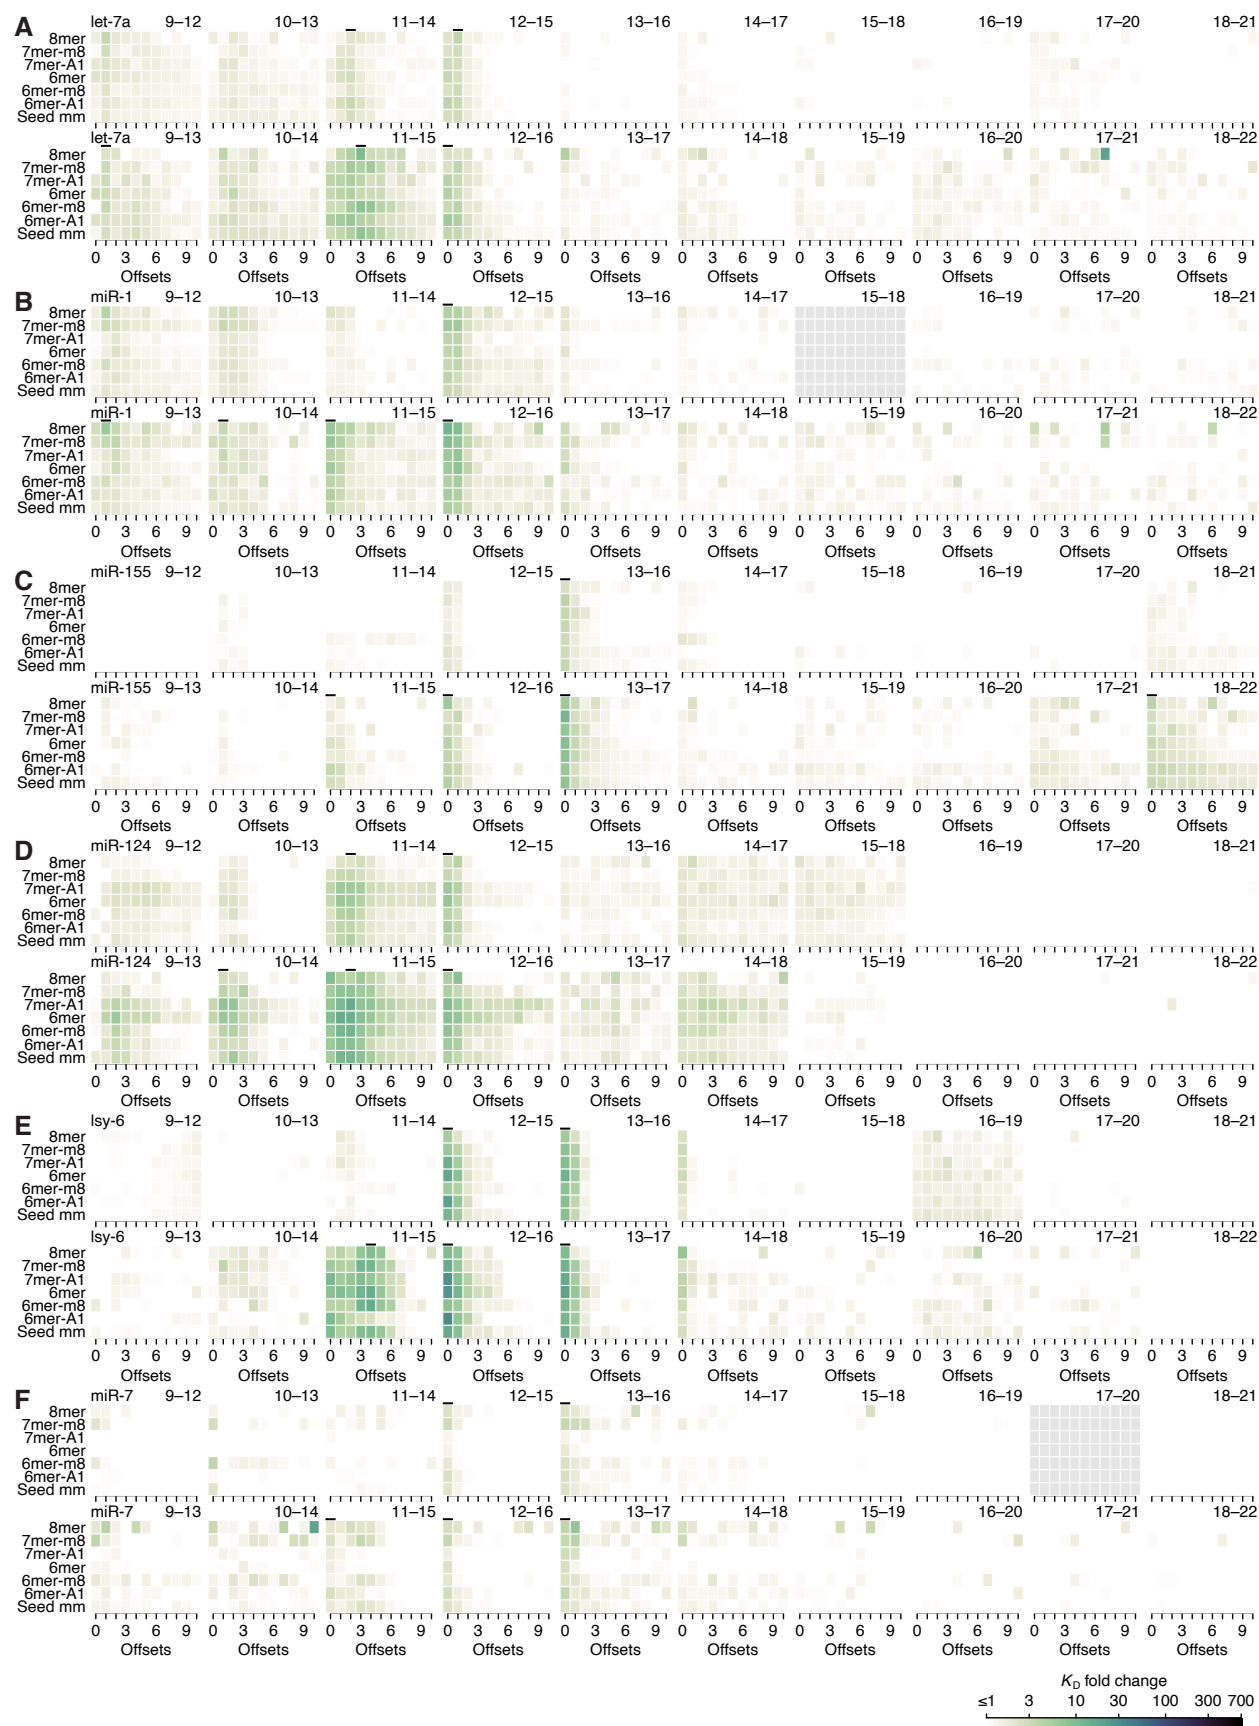

Supplement: supp [file elife-69803-supp-v1.zip]

Figure 5—figure supplement 4.

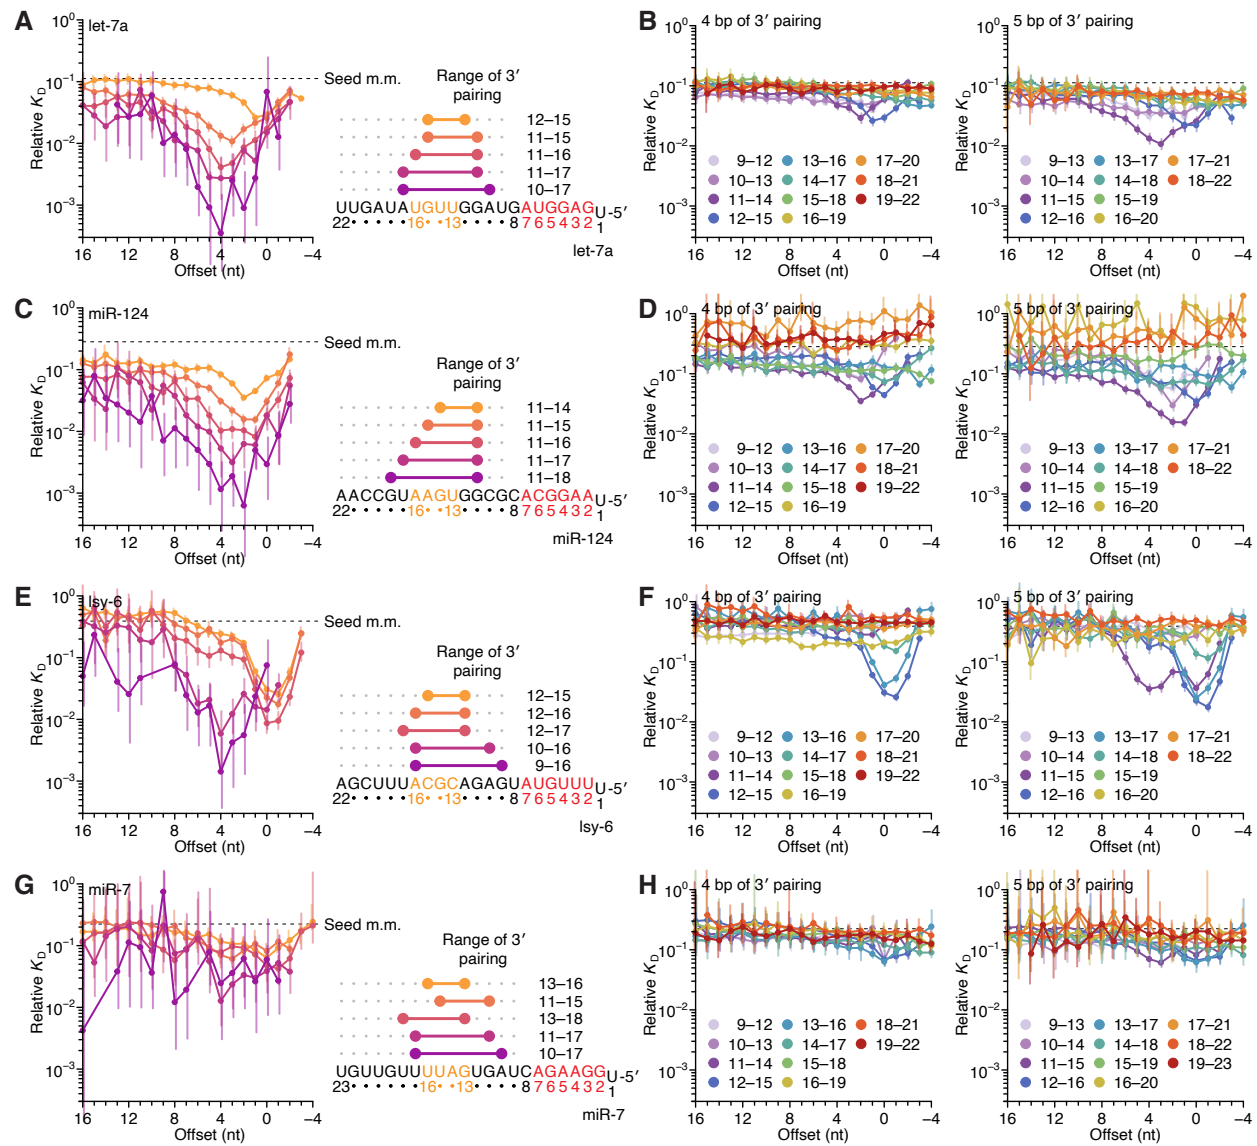

Supplement: supp [file elife-69803-supp-v1.zip]

Figure 7—figure supplement 2.

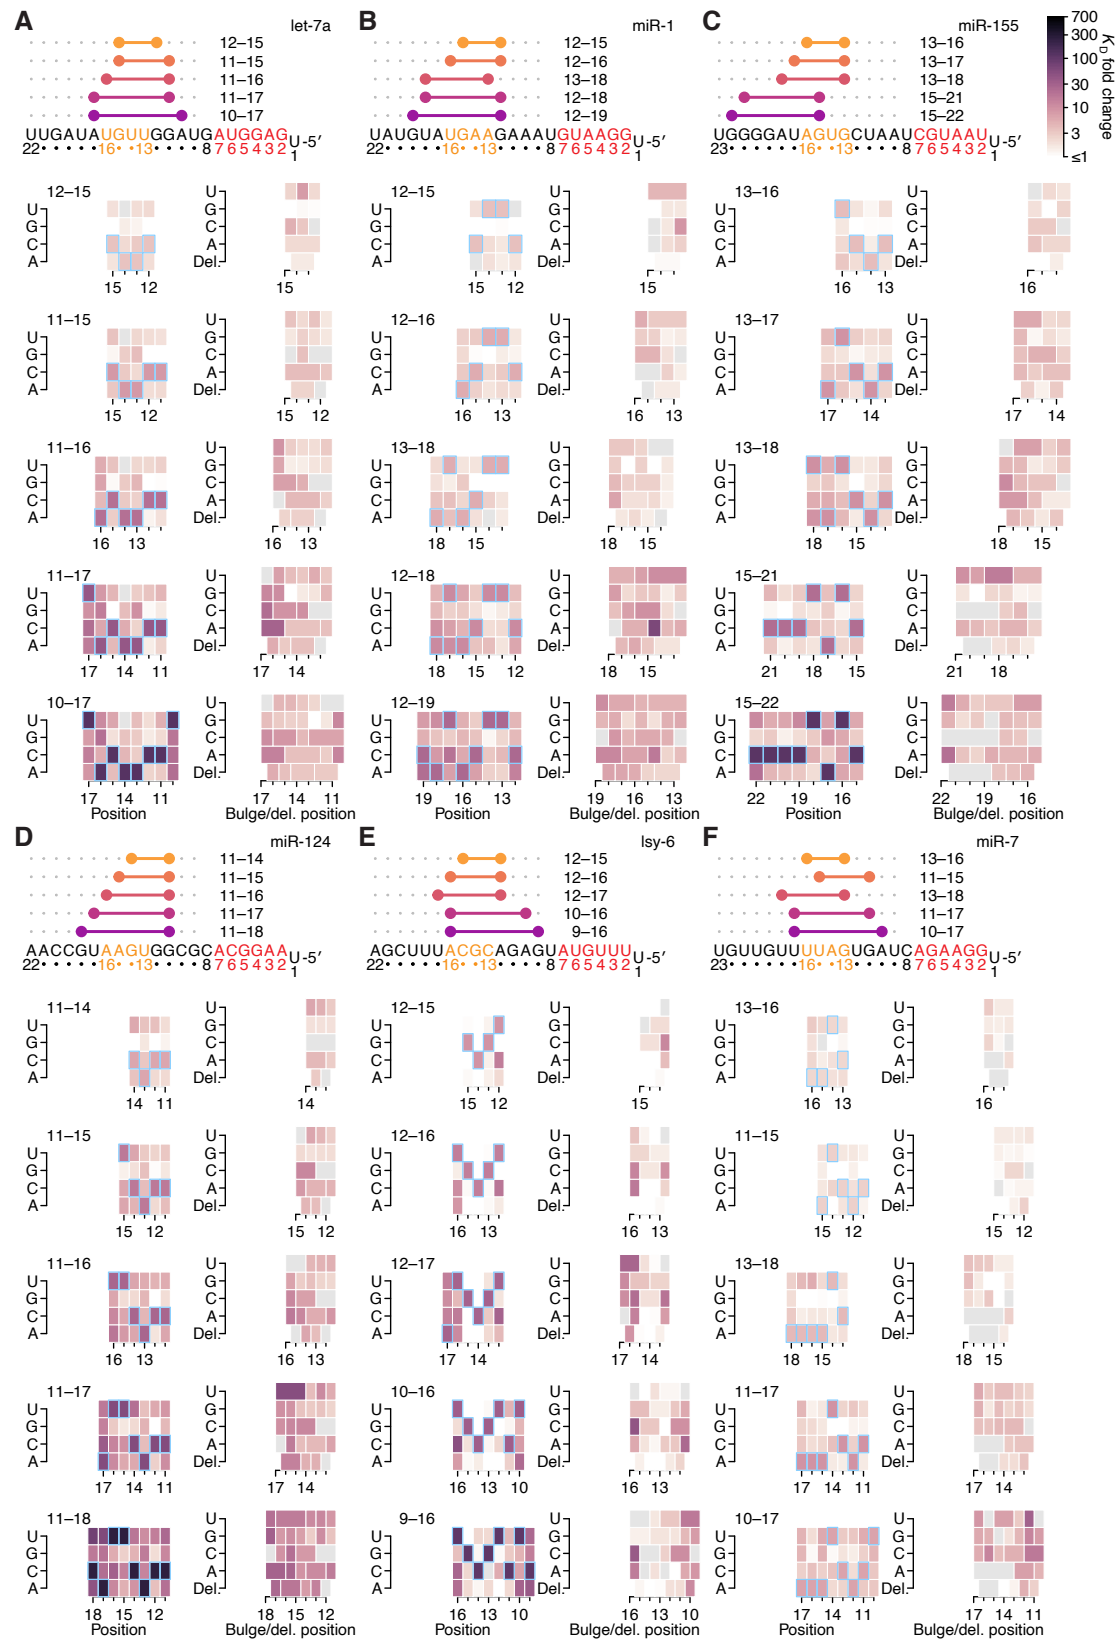

Supplement: supp [file elife-69803-supp-v1.zip]

Figure 5—figure supplement 5.

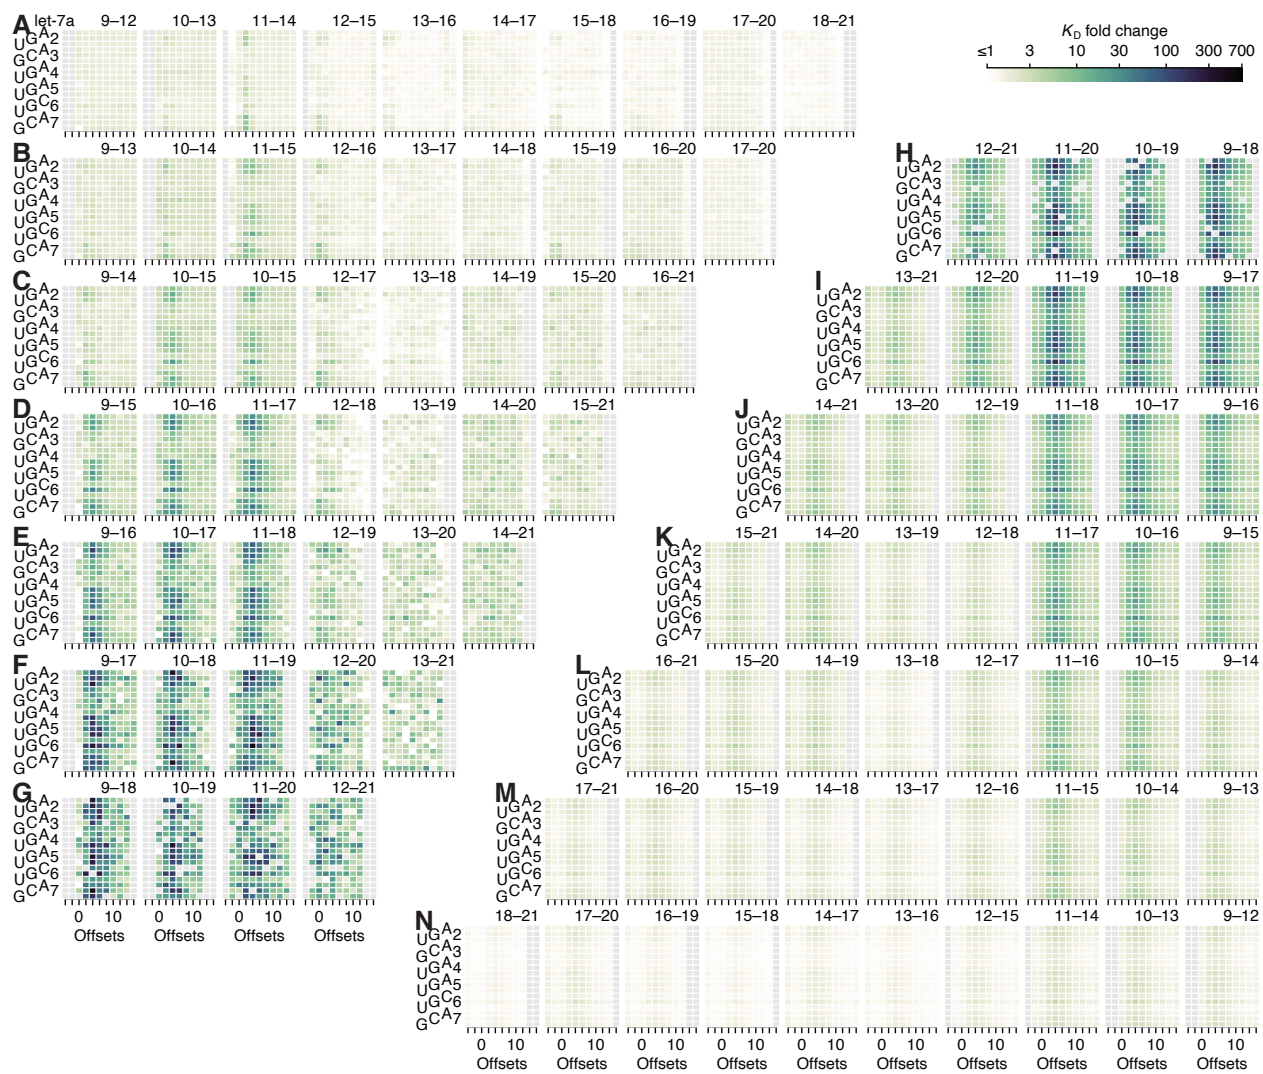

Supplement: supp [file elife-69803-supp-v1.zip]

Figure 6—figure supplement 2.

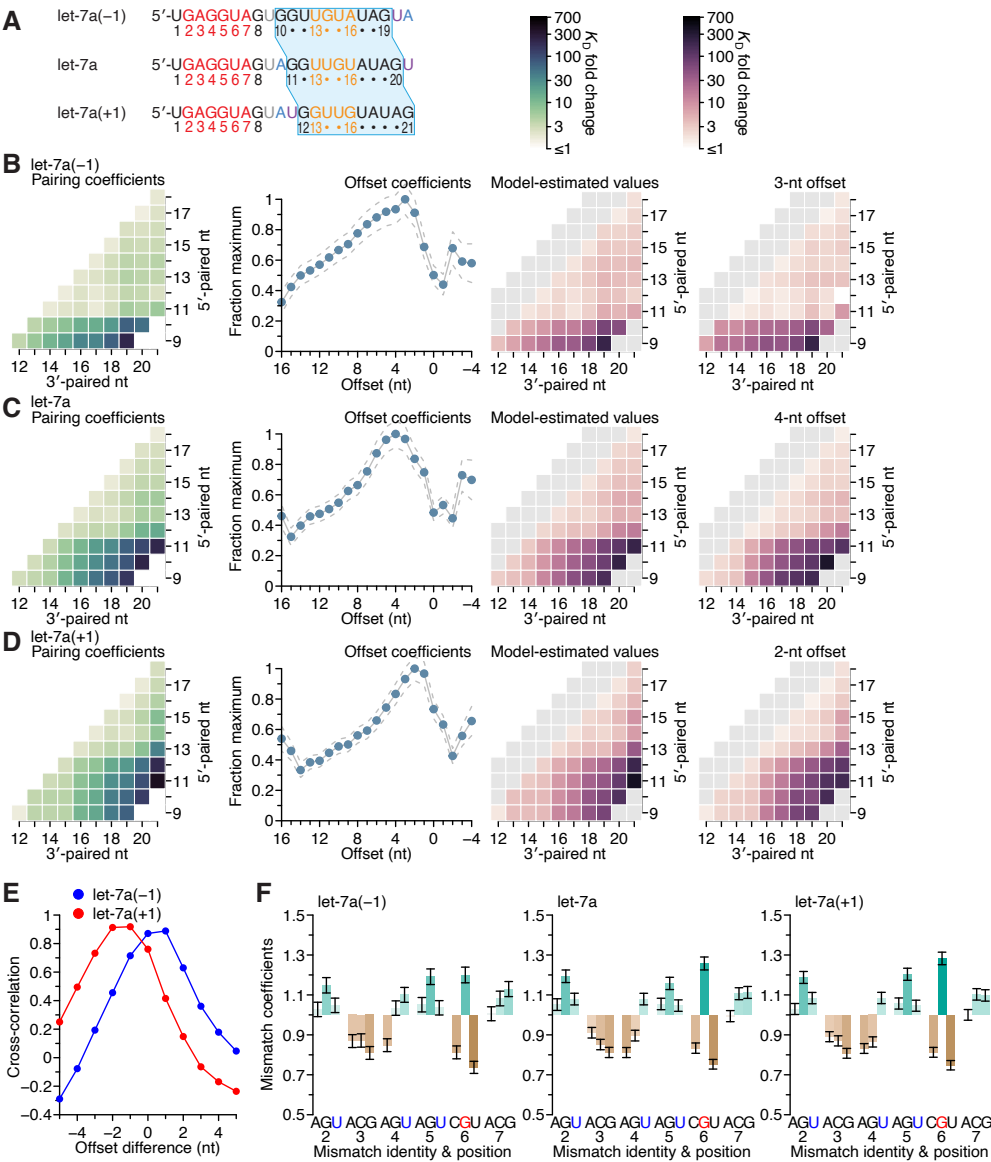

Supplement: supp [file elife-69803-supp-v1.zip]

Figure 2—figure supplement 2.

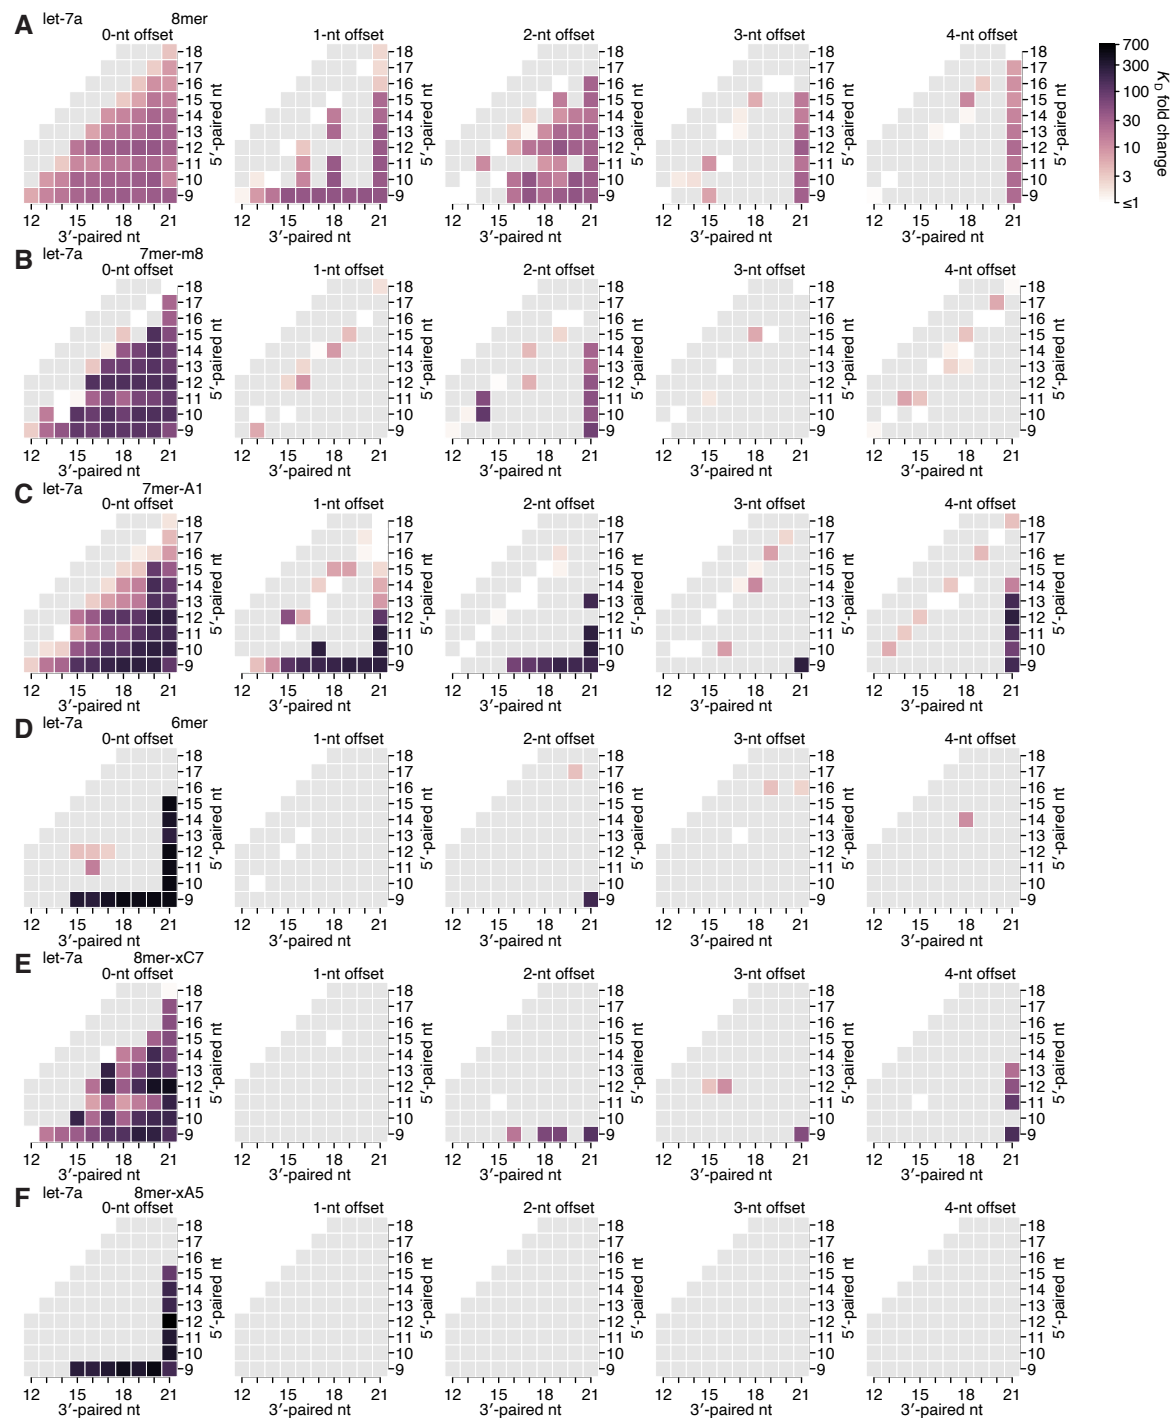

Supplement: supp [file elife-69803-supp-v1.zip]

Figure 4—figure supplement 1.

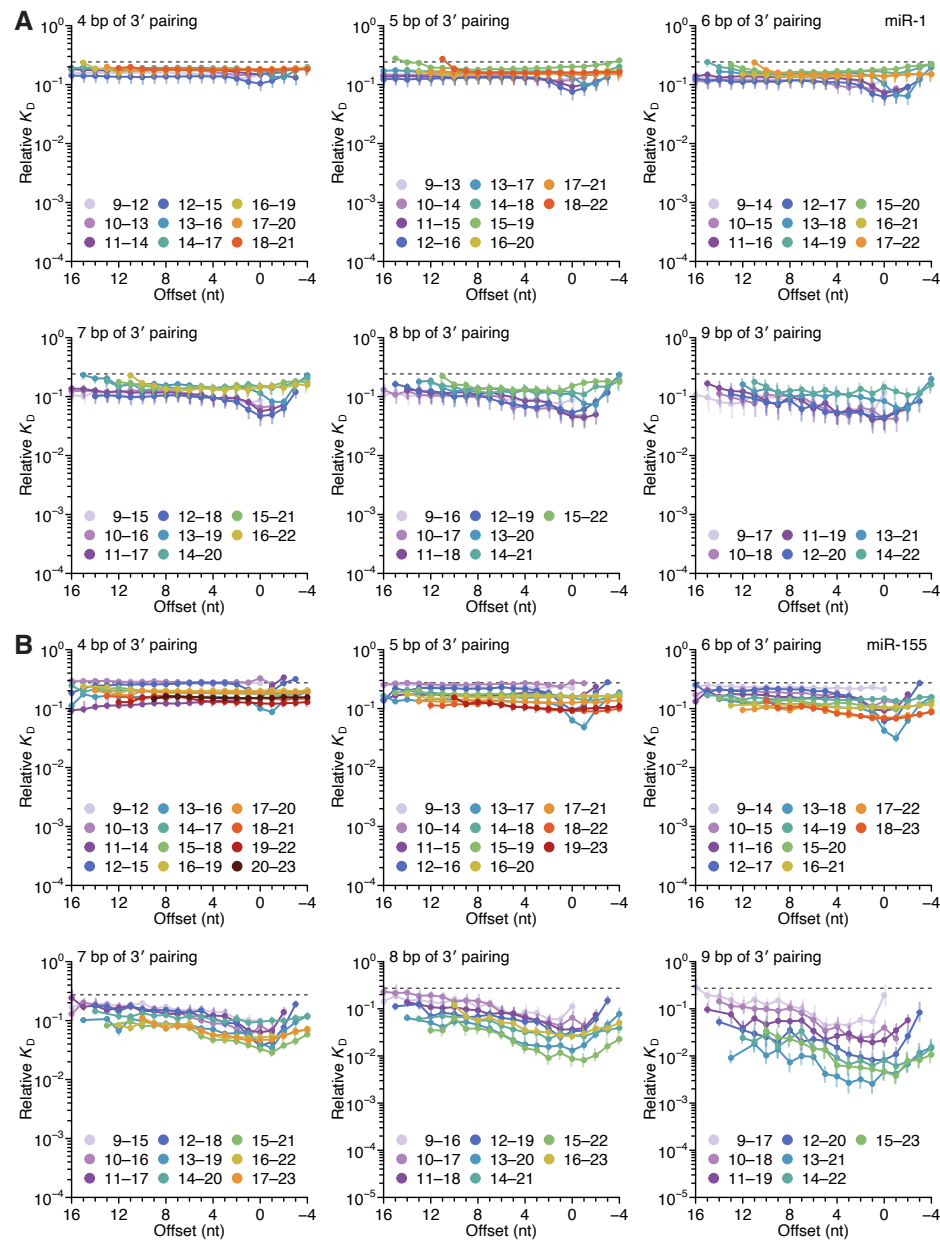

Supplement: supp [file elife-69803-supp-v1.zip]

Figure 6—figure supplement 1.

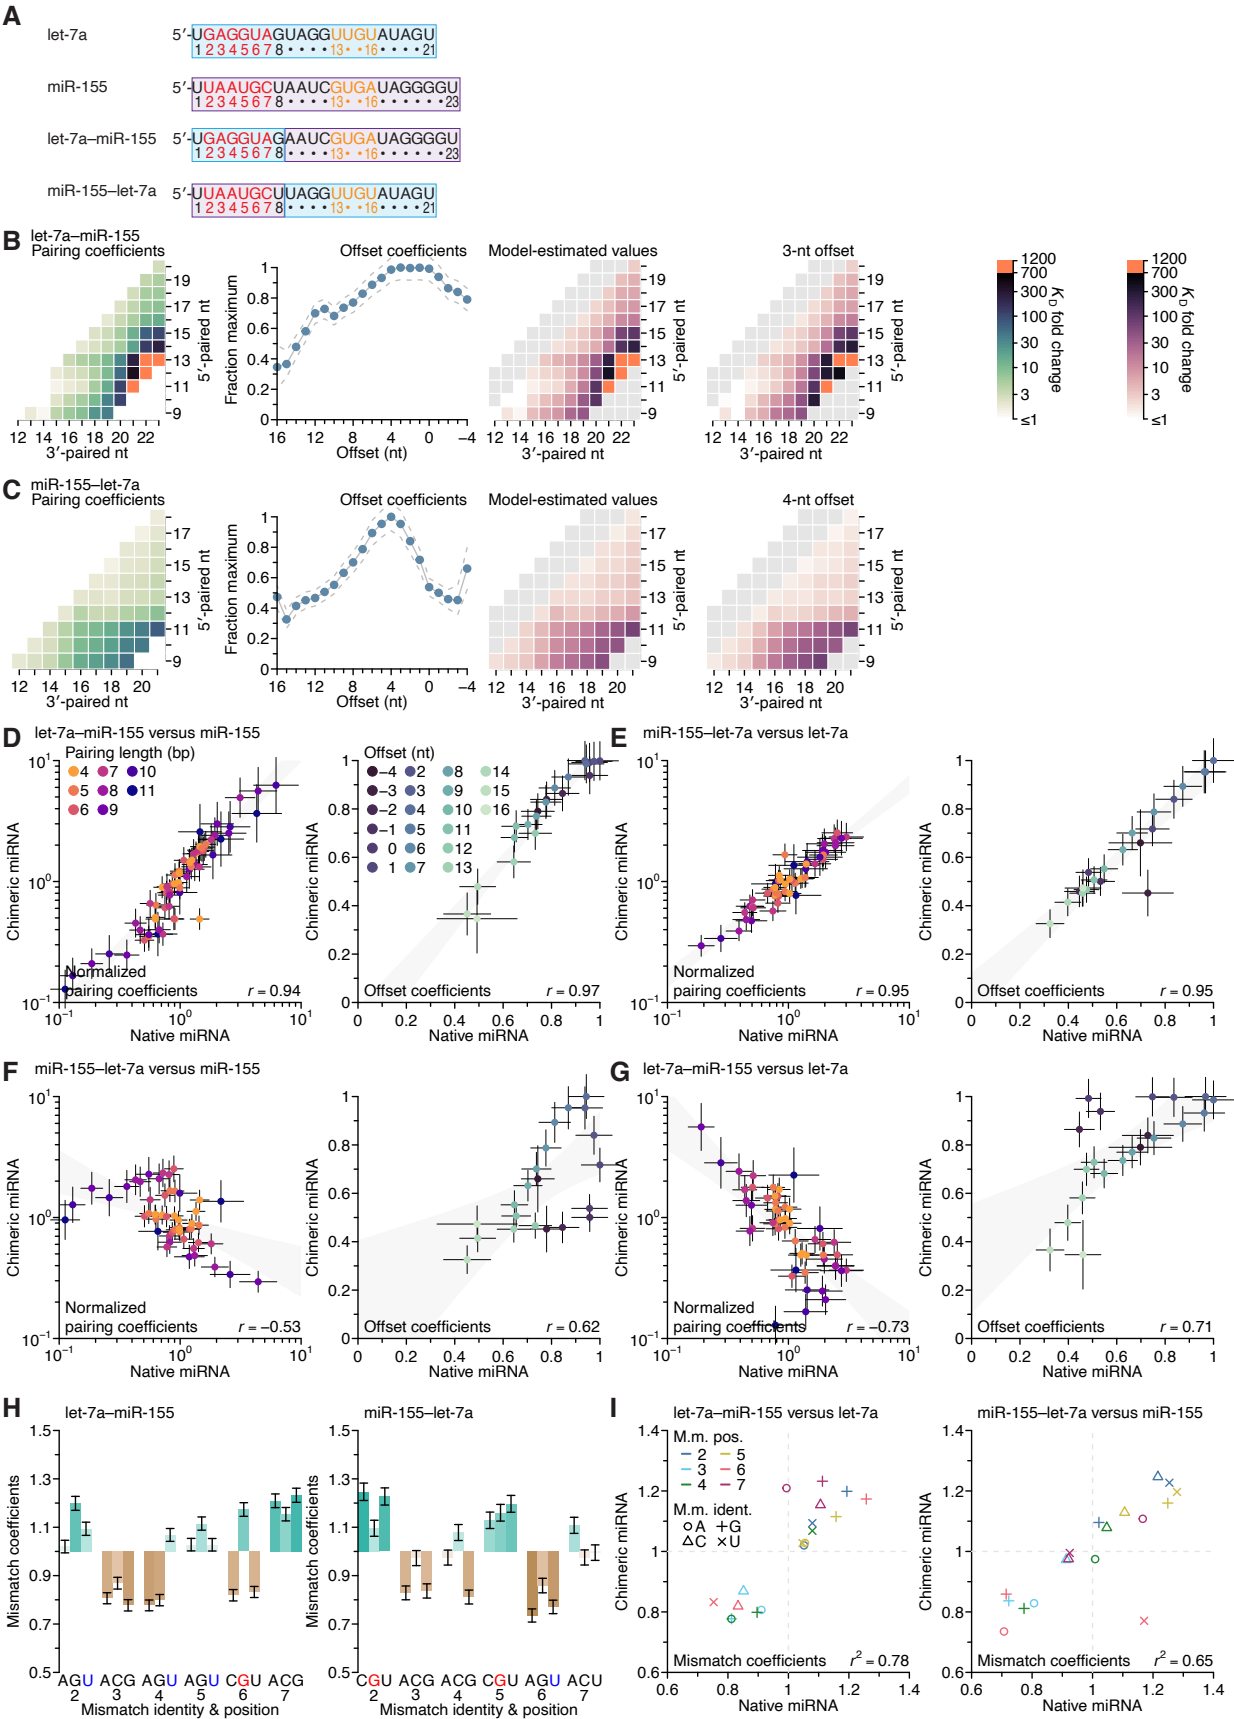

Supplement: supp [file elife-69803-supp-v1.zip]

Figure 7—figure supplement 1.

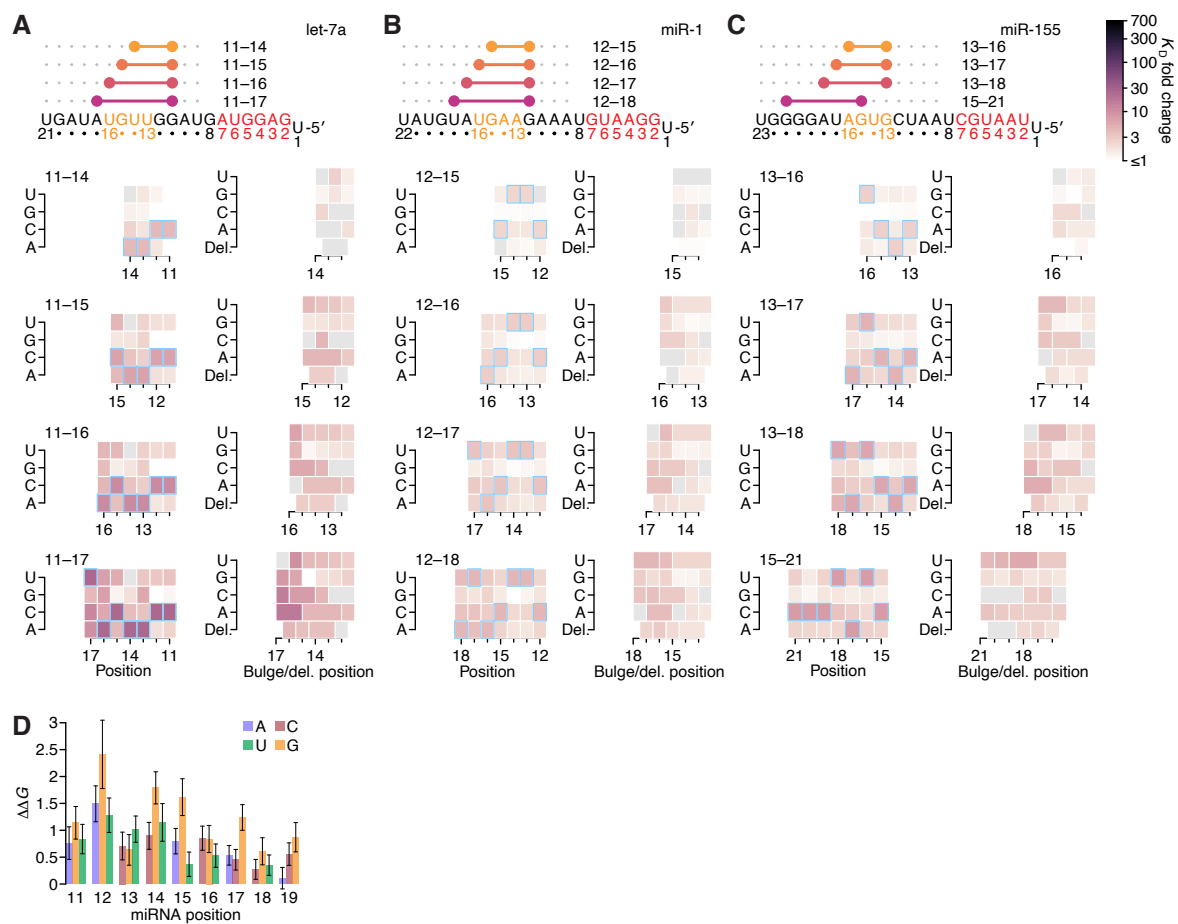

Supplement: supp [file elife-69803-supp-v1.zip]

Figure 5—figure supplement 3.

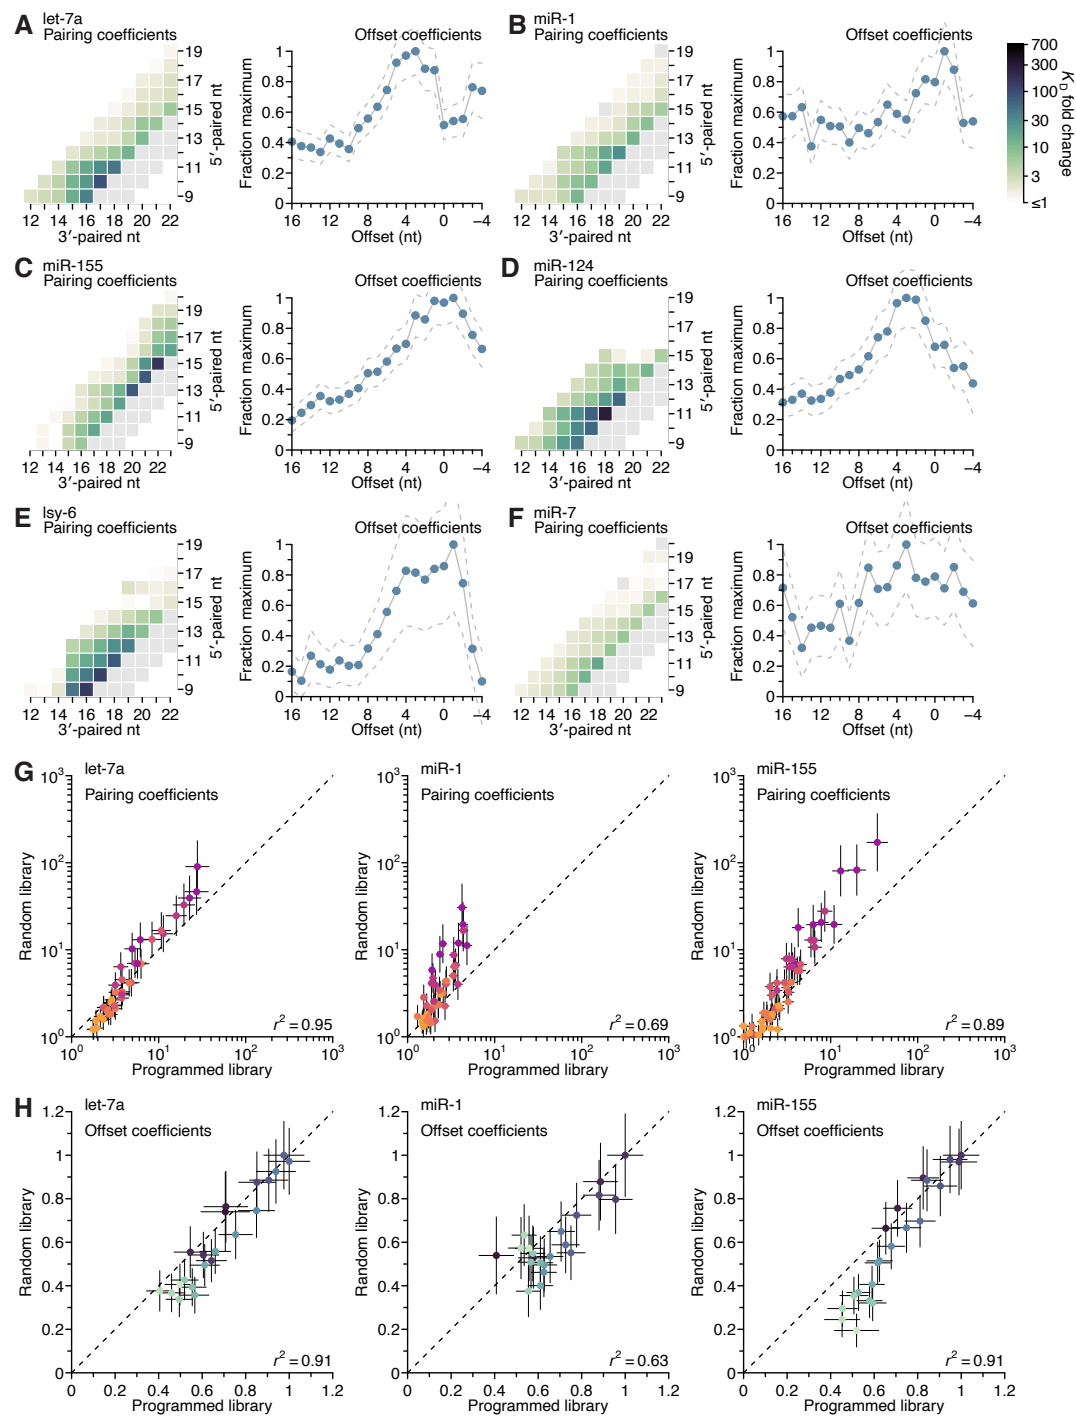

Supplement: supp [file elife-69803-supp-v1.zip]

Figure 3—figure supplement 1.

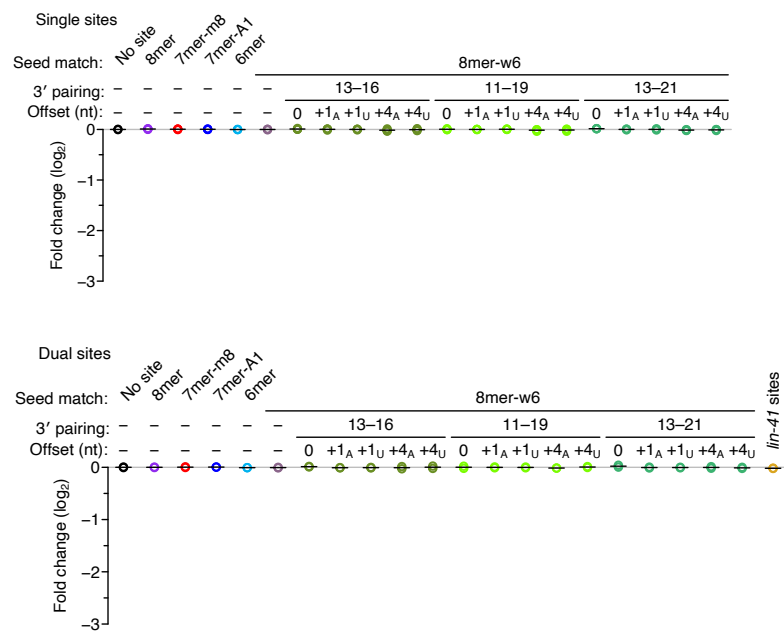

Supplement: supp [file elife-69803-supp-v1.zip]

Figure 5—figure supplement 6.

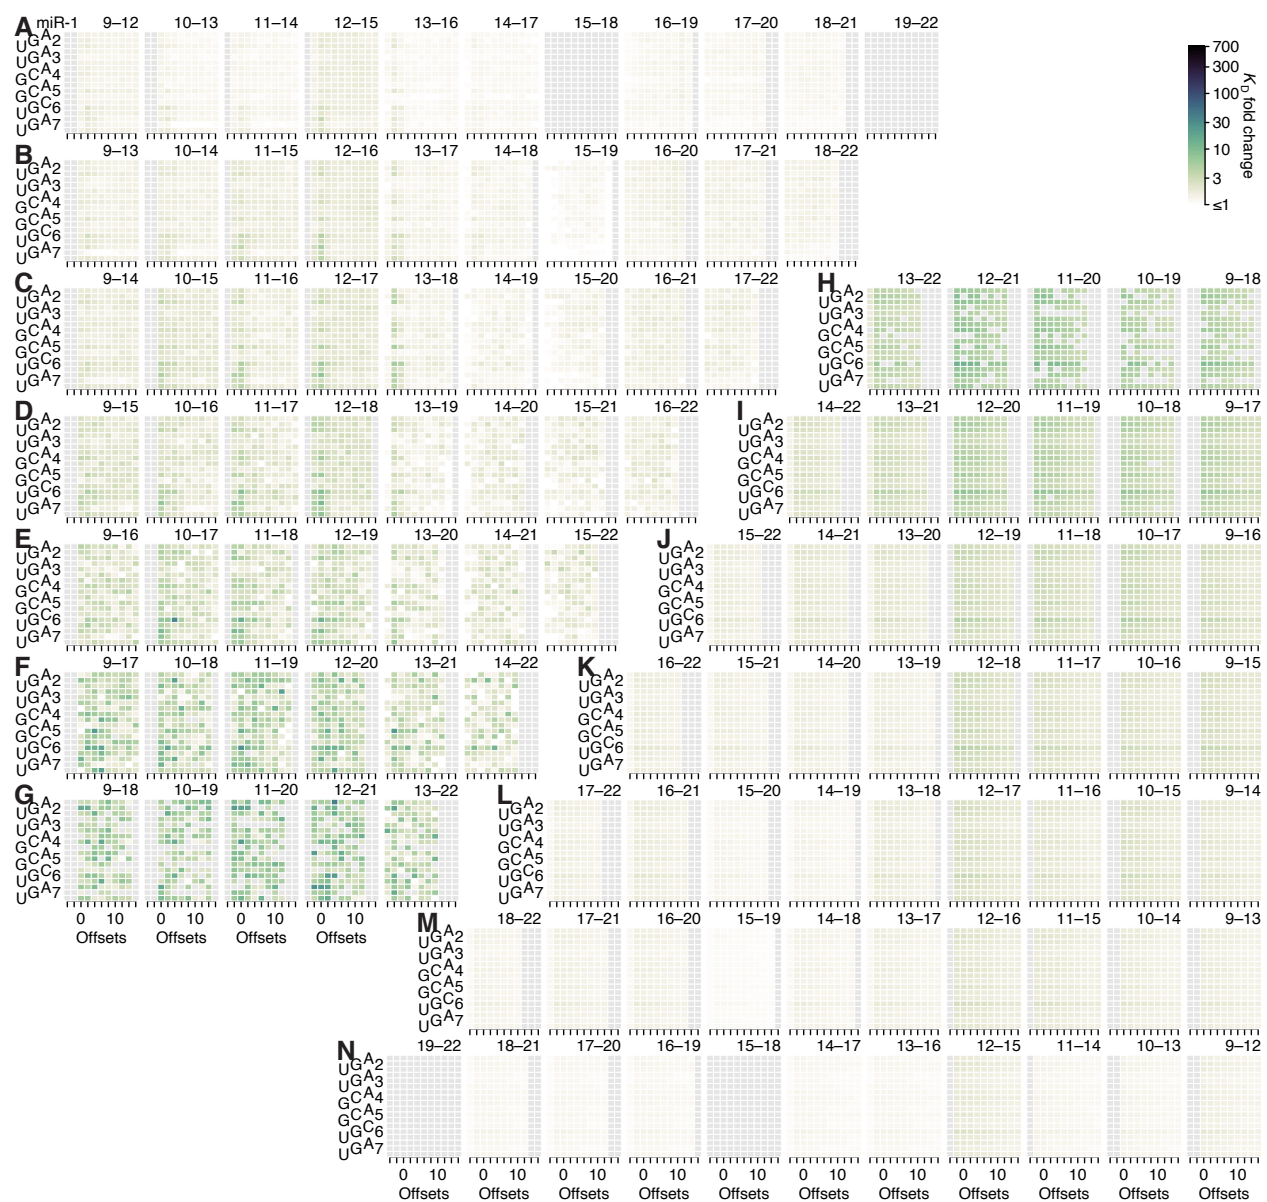

Supplement: supp [file elife-69803-supp-v1.zip]

Figure 5—figure supplement 1.

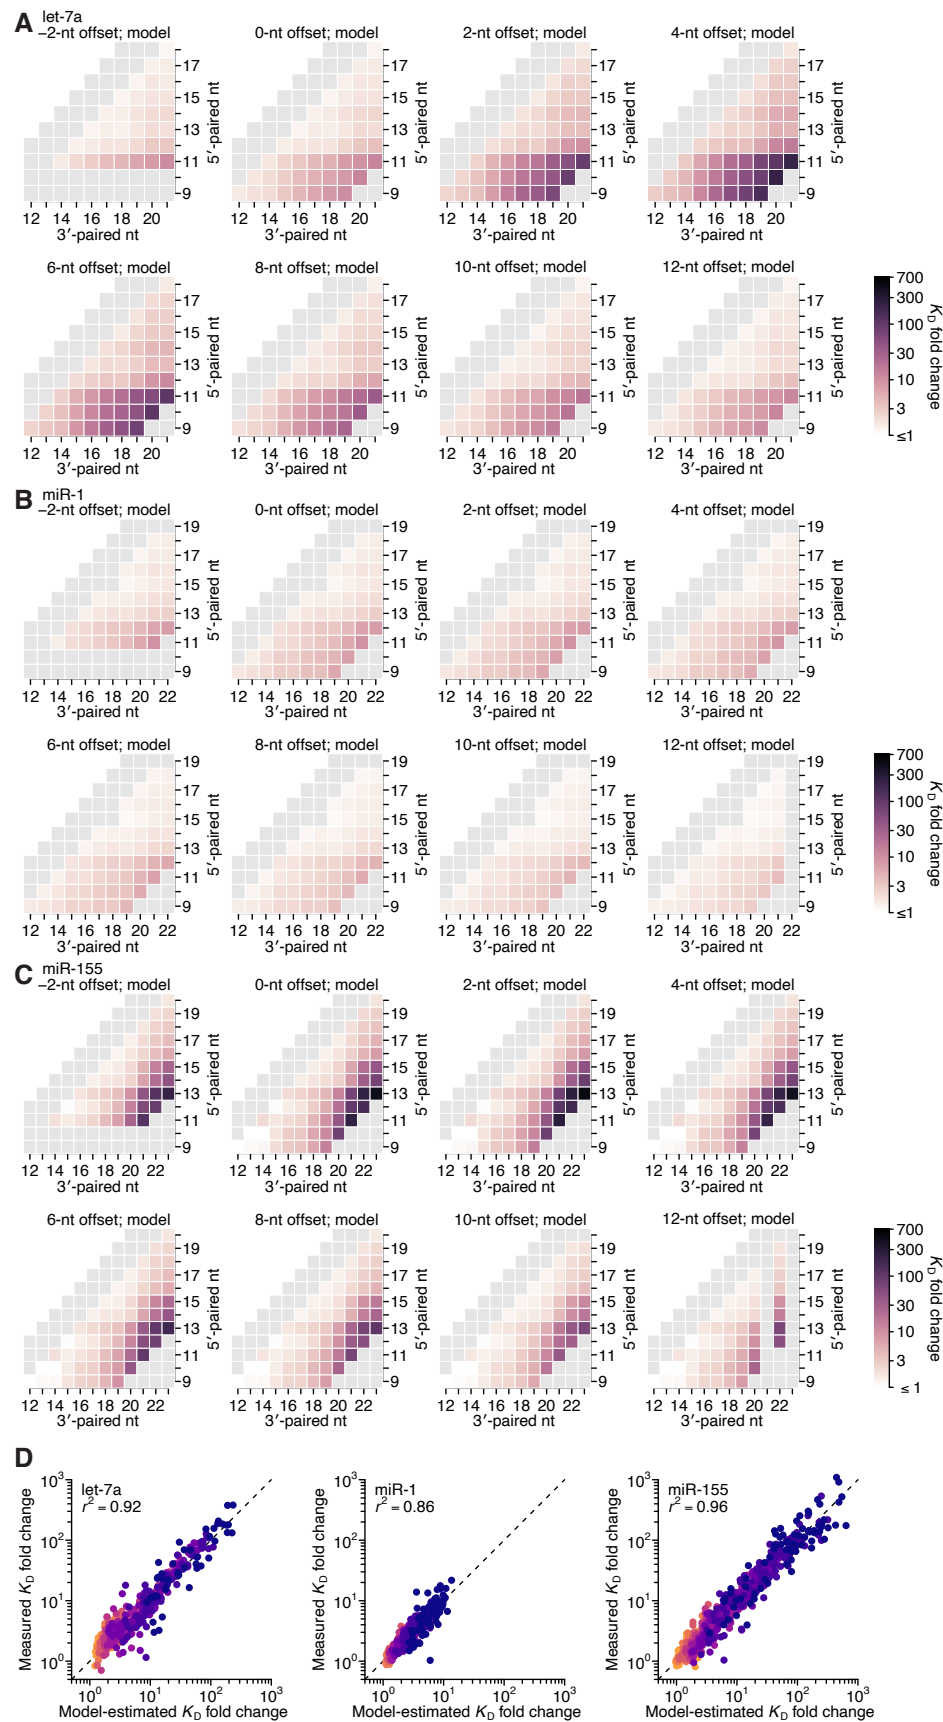

Supplement: supp [file elife-69803-supp-v1.zip]

Figure 3—figure supplement 2.

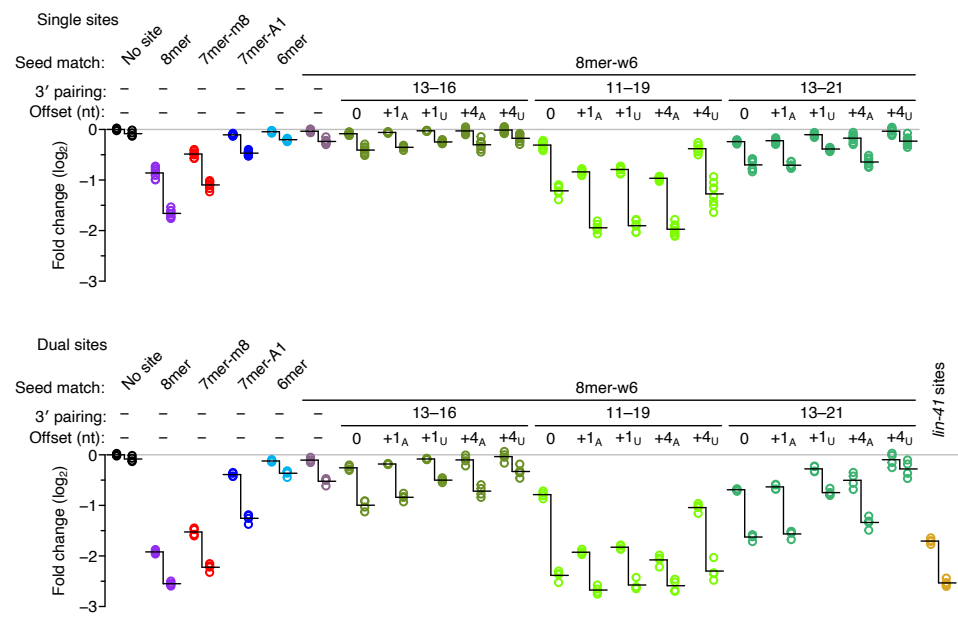

Supplement: supp [file elife-69803-supp-v1.zip]

Figure 2—figure supplement 1.

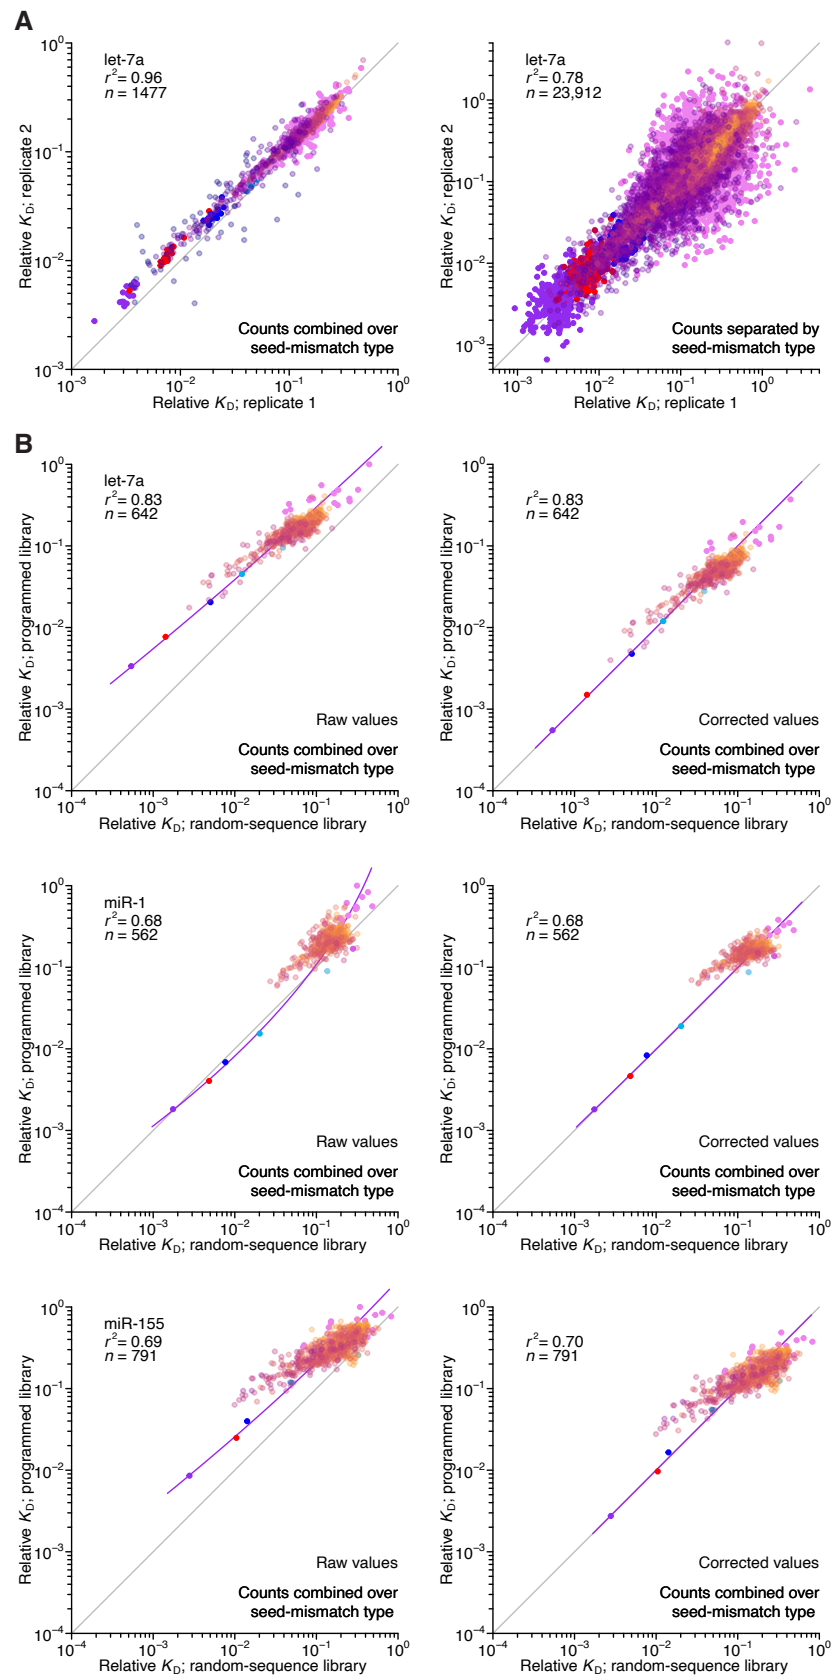

Supplement: supp [file elife-69803-supp-v1.zip]

Figure 5—figure supplement 2.

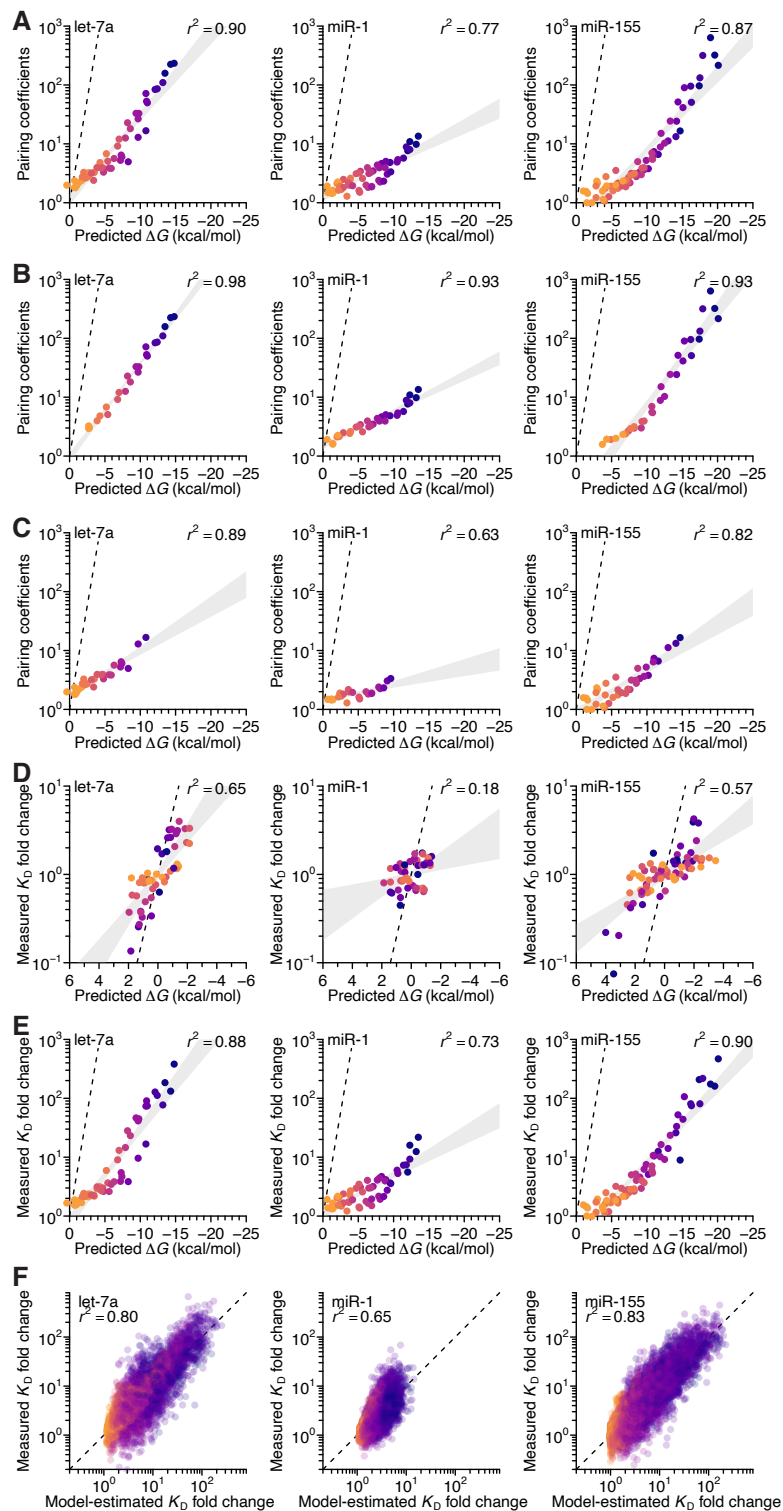

Supplement: supp [file elife-69803-supp-v1.zip]

Figure 5—figure supplement 7.

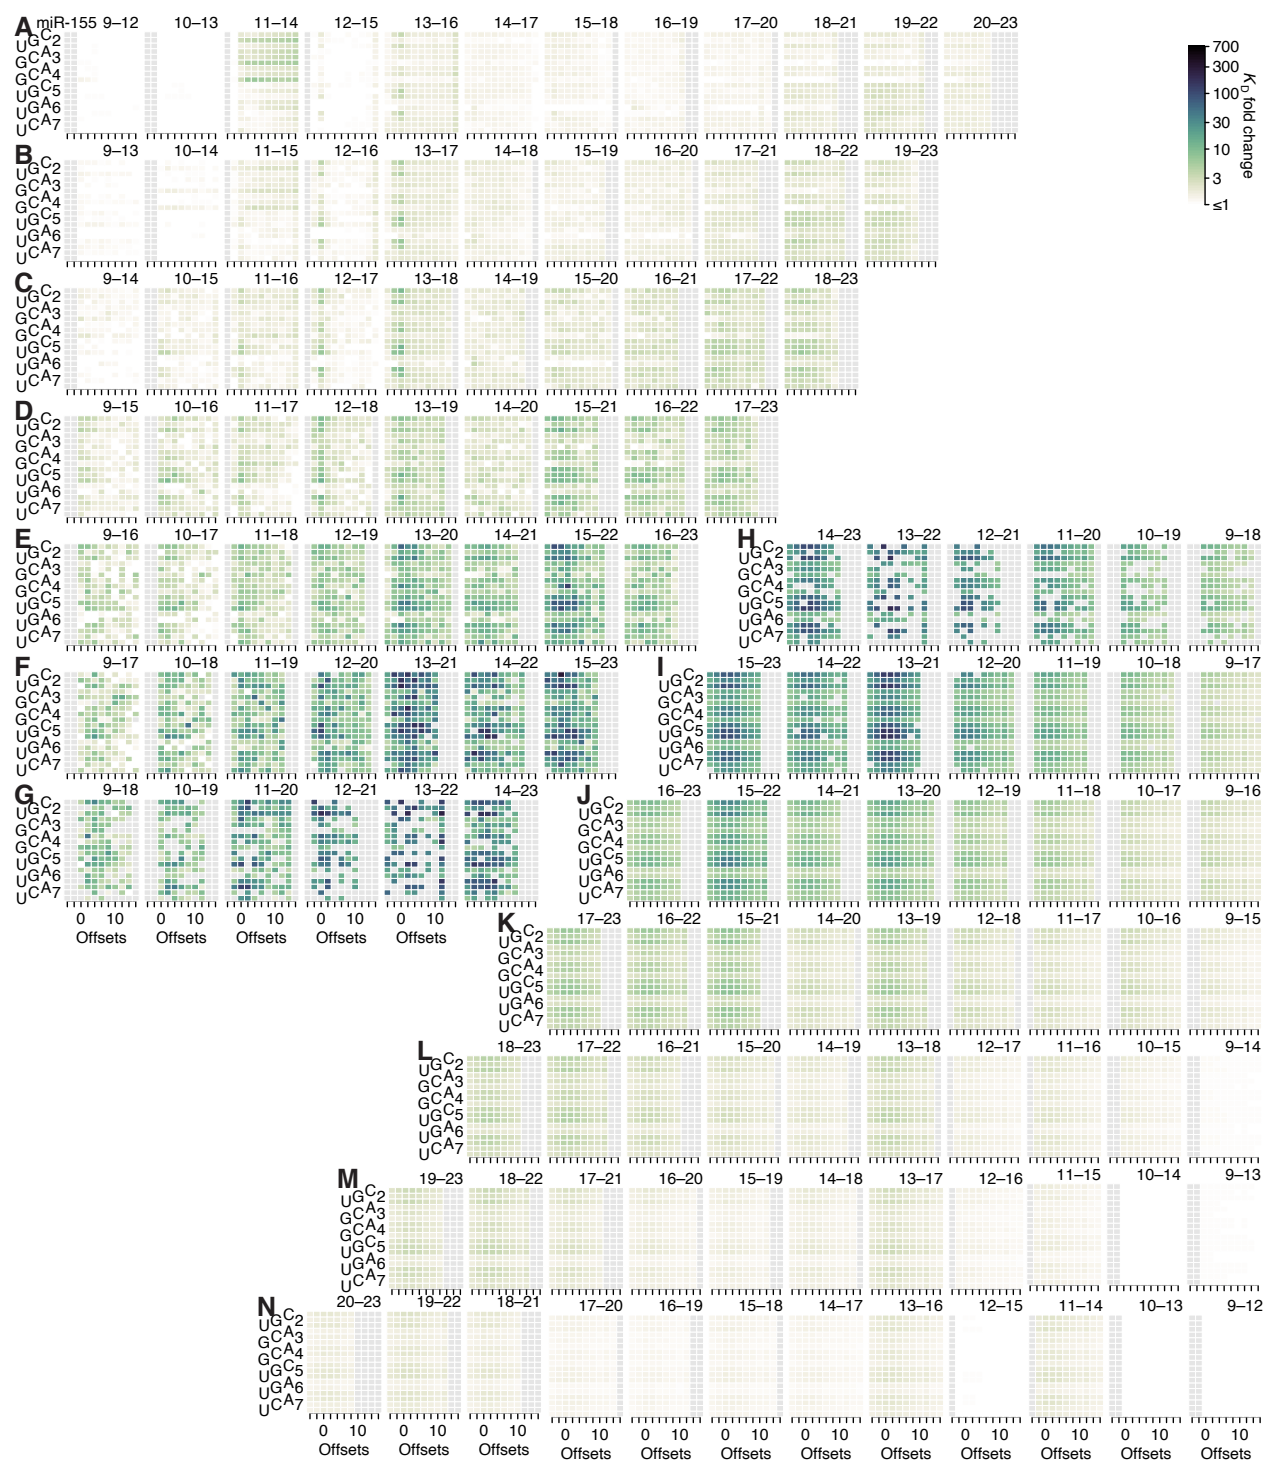

Supplement: supp [file elife-69803-supp-v1.zip]
